# Supplementary material for: A biosynthetically inspired route to substituted furans using the Appel reaction: total synthesis of the furan fatty acid F5
Source: Royal Society of Chemistry journal article supplement (doi:10.1039/c7cc03229c), 2017-01-01

Supplementary information for:

**A biosynthetically inspired route to substituted furans using the Appel reaction: total synthesis of the furan fatty acid F<sub>5</sub>**

Robert J. Lee,[a] Martin R. Lindley,[b] Gareth J. Pritchard[a]\* and Marc C. Kimber[a]\*

[a] School of Science, Department of Chemistry, Loughborough University, Loughborough, LE11 3TU, UK

Email: [M.C.Kimber@lboro.ac.uk](mailto:M.C.Kimber@lboro.ac.uk)

Phone: (+) 44 1509 22 2570

Email: [G.J.Pritchard@lboro.ac.uk](mailto:G.J.Pritchard@lboro.ac.uk)

Phone: (+) 44 1509 22 2586

[b] Dr. M. R. Lindley

School of Sports, Exercise and Health Science, Loughborough University, Loughborough, LE11 3TU, UK

**Contents:**

|                                                          |            |
|----------------------------------------------------------|------------|
| 1. General Experimental Details                          | S2         |
| 2. Synthetic Procedures                                  | S3-S14     |
| 3. NMR Spectral Data ( <sup>1</sup> H / <sup>13</sup> C) | S15 – S112 |

All reactions requiring the omission of air/water were performed under nitrogen atmosphere, using oven-dried glassware. All solvents and commercially available reagents were purchased from Sigma-Aldrich, Alfa Aesar, or Fischer Scientific, and were used without prior purification apart from THF, which was distilled as required over benzophenone and sodium.  $^1\text{H}$  and  $^{13}\text{C}$  NMR spectra, recorded at 400MHz and 100 MHz respectively, were obtained using a Bruker Avance 400 MHz spectrometer or JEOL ECS-400 400 MHz spectrometer. Chemical shifts are reported in parts per million (ppm) downfield from TMS, with the solvent resonance as the reference standard. Coupling constants ( $J$ ) are reported in Hz. Where compounds were obtained as a mixture of isomers, data for the major isomer is quoted. High resolution mass spectra (HRMS) were obtained using a Thermofischer exactive (orbi) resolution mass spectrometer, with ESI as the ionisation source. Thin layer chromatography (TLC) analysis was performed on aluminium backed silica plates. Plates were visualised by ultraviolet light (254 nm), or with vanillin or  $\text{KMnO}_4$  stains and heating. Column chromatography was performed using Apollo Scientific ZEOprep-60 silica, with a particle size of 40 – 63 microns; eluents are specified in brackets.

## 2. Synthetic Procedures

### (E)-Buta-1,3-dien-1-ylbenzene (16b)

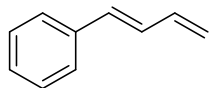

Methyltriphenylphosphonium iodide (2.021 g, 5.00 mmol) was suspended in anhydrous THF (50 mL) and cooled to  $-78^{\circ}\text{C}$ .  $n\text{-BuLi}$  (3.0 mL, 2.5 M in hexanes, 7.50 mmol) was added dropwise, and the mixture brought to room temperature and stirred for 30 minutes to give a clear orange-red solution. *Trans*-cinnamaldehyde (0.95 mL, 7.50 mmol) was added in one portion, and the mixture stirred for 18 hours. Removal of solvents *in vacuo* followed by column chromatography (100% hexanes,  $R_f = 0.35$ ) afforded the title compound as a colourless oil (397 mg, 3.1 mmol, 61%).  **$\delta\text{H}$**  (400 MHz,  $\text{CDCl}_3$ ): 7.47 – 7.42 (2H, m), 7.38 – 7.35 (2H, m), 7.30 – 7.25 (1H, m), 6.88 – 6.81 (1H, m), 6.63 – 6.52 (2H, m), 5.39 (1H, d,  $J = 16.8$  Hz), 5.23 (1H, d,  $J = 10.4$  Hz).  **$\delta\text{C}$**  (100 MHz,  $\text{CDCl}_3$ ): 137.3, 137.3, 133.0, 129.8, 128.8, 127.8, 126.6, 117.8. **IR** ( $\nu_{\text{max}}$ ,  $\text{cm}^{-1}$ ): 1804, 1602, 1494, 1449. **MS** ( $m/z$ ): Found 131.0859, ( $\text{C}_{10}\text{H}_{11}^+$  requires 131.0855).

### 3-Phenyl-3,6-dihydro-1,2-dioxine (14b)<sup>1</sup>

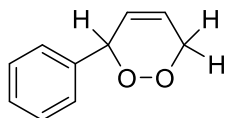

A constant stream of oxygen was passed through a solution of **16b** (0.130 g, 1.00 mmol) and  $10^{-4}$  M disodium Rose Bengal in  $\text{CH}_2\text{Cl}_2/\text{MeOH}$  (19:1, 30 mL) whilst exposed to a 400W halogen light source for 30 hours at room temperature. After removal of solvents *in vacuo*, column chromatography (9:1 hexanes/ethyl acetate  $R_f = 0.45$ ) afforded **14b** as an unstable colourless oil (0.026 g, 0.20 mmol, 16%).  **$\delta\text{H}$**  (400 MHz,  $\text{CDCl}_3$ ): 7.41 – 7.33 (5H, m), 6.21 – 6.16 (1H, m), 6.14 – 6.10 (1H, m), 5.65 – 5.62 (1H, m), 4.80 – 4.74 (1H, m), 4.62 – 4.56 (1H, m).  **$\delta\text{C}$**  (100 MHz,  $\text{CDCl}_3$ ): 137.1, 129.0, 128.6, 126.9, 124.9, 80.7, 69.9. **IR** ( $\nu_{\text{max}}$ ,  $\text{cm}^{-1}$ ): 1493, 1454, 1379, 1260, 1059, 1033. **MS** ( $m/z$ ): Found 185.0575, ( $\text{C}_{10}\text{H}_{10}\text{O}_2\text{Na}^+$  requires 185.0573).

### 2-Phenylfuran (15b)<sup>2</sup>

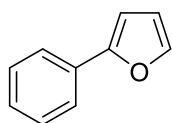

To a solution of  $\text{CBr}_4$  (0.059 g, 0.18 mmol) in  $\text{CH}_2\text{Cl}_2$  (1.0 mL) cooled to  $0^{\circ}\text{C}$  was added  $\text{PPh}_3$  (0.047 g, 0.18 mmol) and the mixture stirred for 10 minutes. A solution of **14b** (0.026 g, 0.16 mmol) in  $\text{CH}_2\text{Cl}_2$  (1.0 mL) was added in one portion, brought to r.t. and stirred for 16 hours. Solvents were removed *in vacuo* and the crude product purified by column chromatography (100% hexanes,  $R_f = 0.48$ ) affording **15b** as an unstable colourless oil (0.021 g, 0.15 mmol, 82%).  **$\delta\text{H}$**  (400 MHz,  $\text{CDCl}_3$ ): 7.72 – 7.69 (2H, m), 7.50 (1H, d,  $J = 2.0$  Hz), 7.43 – 7.39 (2H, m), 7.31 – 7.28 (1H, m), 6.69 (1H, d,  $J = 3.2$  Hz), 6.51 (1H, dd,  $J_1 = 3.2$  Hz,  $J_2 = 2.0$  Hz).  **$\delta\text{C}$**  (100 MHz,  $\text{CDCl}_3$ ): 154.0, 142.1, 131.0, 128.7, 127.4, 123.8, 111.7, 105.0. **IR** ( $\nu_{\text{max}}$ ,  $\text{cm}^{-1}$ ): 1650, 1577, 1540, 1470, 1202, 1113, 1025. **MS** ( $m/z$ ): Found 145.0648, ( $\text{C}_{10}\text{H}_9\text{O}^+$  requires 145.0648).

### (E)-(2-Methylbuta-1,3-dien-1-yl)benzene (16c)

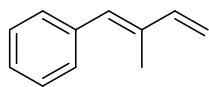

Methyltriphenylphosphonium iodide (2.021 g, 5.00 mmol) was suspended in anhydrous THF (50 mL) and cooled to  $-78^{\circ}\text{C}$ .  $n\text{-BuLi}$  (3.0 mL, 2.5 M in hexanes, 7.50 mmol) was added dropwise, and the mixture brought to room temperature and stirred for 30 minutes to give a clear orange-red solution.  $\alpha$ -methyl-*trans*-cinnamaldehyde (1.05 mL, 7.50 mmol) was added in one portion, and the mixture stirred for 18 hours. Methanol (5.0 mL) was added, then solvents removed *in vacuo* followed by column chromatography (100% hexanes,  $R_f = 0.36$ ) affording a colourless oil (0.489 g, 3.50 mmol, 69%).  **$\delta\text{H}$**  (400 MHz,  $\text{CDCl}_3$ ): 7.49 – 7.33 (5H, m), 6.70 (2H, m), 5.45 (1H, d,  $J = 17.6$  Hz), 5.28 (1H, d,  $J = 10.4$  Hz), 2.15 (3H, s).  **$\delta\text{C}$**  (100 MHz,  $\text{CDCl}_3$ ): 142.1, 138.0, 136.2, 131.9, 129.5, 128.4, 126.9, 113.2, 13.4. **IR** ( $\nu_{\text{max}}$ ,  $\text{cm}^{-1}$ ): 1804, 1607, 1489, 1444. **MS** ( $m/z$ ): Found 145.1016, ( $\text{C}_{11}\text{H}_{13}^+$  requires 145.1012).

<sup>1</sup> M. Matsumoto, S. Dobashi, K. Kuroda and K. Keiko, *Tetrahedron* 1985, **41**, 2147.

<sup>2</sup> L. N. Pridgen and S. S. Jones, *J. Org. Chem.* 1982, **47**, 1590.

#### 4-Methyl-3-phenyl-3,6-dihydro-1,2-dioxine (**14c**)<sup>3</sup>

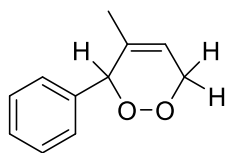

A constant stream of oxygen was passed through a solution of **16c** (0.144 g, 1.00 mmol) and 10<sup>-4</sup> M disodium Rose Bengal in CH<sub>2</sub>Cl<sub>2</sub>/MeOH (19:1, 30 mL) whilst exposed to a 400W halogen light source for 18 hours at room temperature. After removal of solvents *in vacuo*, column chromatography (9:1 hexanes/ethyl acetate R<sub>f</sub> = 0.42) afforded **14c** as a colourless oil (0.030 g, 0.17 mmol, 17%). **δH** (400 MHz, CDCl<sub>3</sub>): 7.40 – 7.35 (5H, m), 5.89 – 5.87 (1H, m), 5.33 (1H, s), 4.74 – 4.68 (1H, m), 4.63 – 4.58 (1H, m), 1.59 (3H, s). **δC** (100 MHz, CDCl<sub>3</sub>): 136.6, 133.2, 129.4, 129.1, 128.6, 120.0, 84.6, 70.2, 19.0. **IR** (ν<sub>max</sub>, cm<sup>-1</sup>): 1677, 1492, 1453, 1380, 1068, 1020. **MS** (m/z): Found 199.0730 (C<sub>11</sub>H<sub>12</sub>O<sub>2</sub>Na<sup>+</sup> requires 199.0730).

#### 3-Methyl-2-phenylfuran (**15c**)<sup>4</sup>

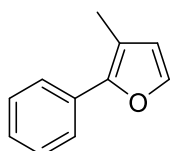

To a solution of CBr<sub>4</sub> (0.062 g, 0.19 mmol) in CH<sub>2</sub>Cl<sub>2</sub> (1.0 mL) cooled to 0 °C was added PPh<sub>3</sub> (0.049 g, 0.10 mmol) and the mixture stirred for 10 minutes. A solution of **14c** (0.030 g, 0.17 mmol) in CH<sub>2</sub>Cl<sub>2</sub> (1.0 mL) was added in one portion, the mixture brought to r.t. and stirred for 16 hours. Solvents were removed *in vacuo* and the crude product purified by column chromatography (100% hexanes, R<sub>f</sub> = 0.51) affording **15c** as a colourless oil (0.027 g, 0.17 mmol, 91%). **δH** (400 MHz, CDCl<sub>3</sub>): 7.65 – 7.63 (2H, m), 7.44 – 7.38 (3H, m), 7.29 – 7.24 (1H, m), 6.34 (1H, d, *J* = 1.6 Hz), 2.30 (3H, s). **δC** (100 MHz, CDCl<sub>3</sub>): 148.8, 140.8, 131.9, 128.6, 126.8, 125.4, 116.3, 115.2, 12.0. **IR** (ν<sub>max</sub>, cm<sup>-1</sup>): 1682, 1608, 1510, 1485, 1443, 1164. **MS** (m/z): Found 159.0804 (C<sub>11</sub>H<sub>11</sub>O<sup>+</sup> requires 159.0805).

#### (E)-(3-Methylbuta-1,3-dien-1-yl)benzene (**16d**)

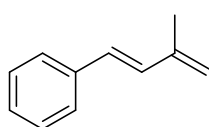

Methyltriphenylphosphonium iodide (2.021 g, 5.00 mmol) was suspended in anhydrous THF (50 mL) and cooled to -78 °C. <sup>n</sup>BuLi (3.0 mL, 2.5 M in hexanes, 7.50 mmol) was added dropwise, and the mixture brought to room temperature and stirred for 30 minutes to give a clear orange-red solution. Benzylideneacetone (0.731 g, 5.50 mmol) was added in one portion, and the mixture stirred for 16 hours, after which point MeOH (5.0 mL) was added, then solvents removed *in vacuo*. Column chromatography (100% hexanes, R<sub>f</sub> = 0.42) affording a colourless oil (0.576 g, 4.0 mmol, 80%). **δH** (400 MHz, CDCl<sub>3</sub>): 7.48 – 7.45 (2H, m), 7.37 – 7.33 (2H, m), 7.28 – 7.23 (1H, m), 6.91 (1H, d, *J* = 16.4 Hz), 6.57 (1H, d, *J* = 16.4 Hz), 5.15 (2H, d, *J* = 16.8 Hz), 2.01 (3H, s). **δC** (100 MHz, CDCl<sub>3</sub>): 142.2, 137.5, 131.8, 128.8, 128.7, 127.5, 126.6, 117.5, 18.7. **IR** (ν<sub>max</sub>, cm<sup>-1</sup>): 1605, 1493, 1446. **MS** (m/z): Found 145.1014 (C<sub>11</sub>H<sub>13</sub><sup>+</sup> requires 145.1012).

#### 5-Methyl-3-phenyl-3,6-dihydro-1,2-dioxine (**14d**)<sup>5</sup>

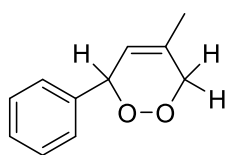

A constant stream of oxygen was passed through a solution of **16d** (0.100 g, 0.69 mmol) and 10<sup>-4</sup> M disodium Rose Bengal in CH<sub>2</sub>Cl<sub>2</sub>/MeOH (19:1, 30 mL) whilst exposed to a 400W halogen light source for 28 hours at room temperature. After removal of solvents *in vacuo*, column chromatography (9:1 hexanes/ethyl acetate R<sub>f</sub> = 0.51) afforded **14d** as a colourless oil (0.045 g, 0.26 mmol, 26%). **δH** (400 MHz, CDCl<sub>3</sub>): 7.42 – 7.36 (5H, m), 5.84 – 5.82 (1H, m), 5.62 – 5.60 (1H, m), 4.64 (1H, d, *J* = 16.0 Hz), 4.45 (1H, d, *J* = 16.0 Hz), 1.86 (3H, s). **δC** (100 MHz, CDCl<sub>3</sub>): 137.8, 132.5, 128.8, 128.5, 128.5, 120.8, 80.4, 73.0, 18.3. **IR** (ν<sub>max</sub>, cm<sup>-1</sup>): 1681, 1492, 1453, 1022. **MS** (m/z): Found 199.0730 (C<sub>11</sub>H<sub>12</sub>O<sub>2</sub>Na<sup>+</sup> requires 199.0730).

<sup>3</sup> B. W. Greatrex and D. K. Taylor, *J. Org. Chem.* 2004, **69**, 2577.

<sup>4</sup> A. I. Meyers and R. F. Spohn, *J. Org. Chem.* 1985, **50**, 4872.

<sup>5</sup> A. Eske, B. Goldfuss, A. G. Griesbeck, A. de Kiff, M. Kleczka, M. Leven, J. –M. Neudoerfl and M. Vollmer, *J. Org. Chem.* 2014, **79**, 1818.

#### 4-Methyl-2-phenylfuran (15d)<sup>6</sup>

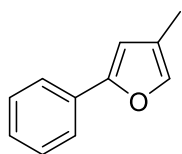

To a solution of  $\text{CBr}_4$  (0.093 g, 0.28 mmol) in  $\text{CH}_2\text{Cl}_2$  (2.0 mL) cooled to 0 °C was added  $\text{PPh}_3$  (0.074 g, 0.28 mmol) and the mixture stirred for 10 minutes. A solution of **14d** (0.045 g, 0.26 mmol) in  $\text{CH}_2\text{Cl}_2$  (1.0 mL) was added in one portion, the mixture brought to r.t., and stirred for 16 hours. Solvents were removed *in vacuo* and the crude product purified by column chromatography (100% hexanes,  $R_f$  = 0.50) affording **15d** as a colourless oil (0.036 g, 0.23 mmol, 87%).  **$\delta\text{H}$**  (400 MHz,  $\text{CDCl}_3$ ): 7.69 – 7.67 (2H, m), 7.43 – 7.39 (2H, m), 7.31 – 7.26 (2H, m), 6.57 (1H, s), 2.12 (3H, s).  **$\delta\text{C}$**  (100 MHz,  $\text{CDCl}_3$ ): 153.8, 138.9, 131.1, 128.7, 127.2, 123.7, 122.0, 107.7, 9.9. **IR** ( $\nu_{\text{max}}$ ,  $\text{cm}^{-1}$ ): 1597, 1539, 1479, 1445, 1387, 1185. **MS** ( $m/z$ ): Found 159.0809 ( $\text{C}_{11}\text{H}_{11}\text{O}^+$  requires 159.0804).

#### (3*R*,6*S*)-3,6-Diphenyl-3,6-dihydro-1,2-dioxine (14a)<sup>1</sup>

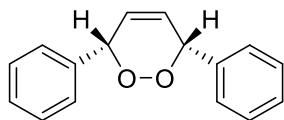

A constant stream of oxygen was passed through a solution of *trans,trans*-1,4-diphenyl-1,3-butadiene (2.066 g, 10.00 mmol) in 19:1  $\text{CH}_2\text{Cl}_2/\text{MeOH}$  (80 mL) containing  $10^{-4}$  M methylene blue for 24 h. Solvents were removed *in vacuo*, followed by column chromatography (5:1 hexanes/ethyl acetate  $R_f$  = 0.50) afforded the endoperoxide as pale yellow crystals (1.330 g, 5.60 mmol, 56%).  **$\delta\text{H}$**  (400 MHz,  $\text{CDCl}_3$ ): 7.50 – 7.25 (10H, m), 6.35 (2H, s), 5.68 (2H, s).  **$\delta\text{C}$**  (100 MHz,  $\text{CDCl}_3$ ): 137.6, 132.9, 128.8, 128.7, 128.5, 80.2. **IR** ( $\nu_{\text{max}}$ ,  $\text{cm}^{-1}$ ): 1595, 1492, 1454, 1265, 1061. **MP** (°C): 79.1 – 84.2. **MS** ( $m/z$ ): Found 261.0883 ( $\text{C}_{16}\text{H}_{14}\text{O}_2\text{Na}^+$  requires 261.0886).

#### 2,5-Diphenylfuran (15a)<sup>7</sup>

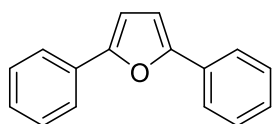

To a solution of  $\text{CBr}_4$  (0.182 g, 0.55 mmol) in  $\text{CH}_2\text{Cl}_2$  (3.0 mL) cooled to 0 °C was added  $\text{PPh}_3$  (0.144 g, 0.55 mmol) and the mixture stirred for 20 minutes. After this period, a solution of **14a** (0.120 g, 0.50 mmol) in  $\text{CH}_2\text{Cl}_2$  (2.0 mL) was added in one portion, the mixture brought to r.t. and stirred for 16 h. Solvents were removed *in vacuo*, then purified by column chromatography (4:1 hexanes/ethyl acetate  $R_f$  = 0.58) affording a pale yellow crystalline solid (0.104 g, 0.48 mmol, 95%).  **$\delta\text{H}$**  (400 MHz,  $\text{CDCl}_3$ ): 7.77 – 7.25 (10H, m), 6.74 (2H, s).  **$\delta\text{C}$**  (100 MHz,  $\text{CDCl}_3$ ): 153.4, 130.8, 129.3, 128.7, 123.7, 107.3. **IR** ( $\nu_{\text{max}}$ ,  $\text{cm}^{-1}$ ): 1597, 1482, 1443, 1288. **MP** (°C): 86.0 – 90.2. **MS** ( $m/z$ ): Found 221.0959 ( $\text{C}_{16}\text{H}_{13}\text{O}^+$  requires 221.0961).

#### ((1*E*)-Hepta-1,3-dien-1-yl)benzene (*E/Z* = 1.0 : 1.7) (16e)

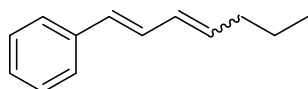

<sup>n</sup>Butyltriphenylphosphonium bromide (2.00g, 5.00 mmol) was suspended in anhydrous THF (50 mL) and cooled to -78 °C. <sup>n</sup>BuLi (3.0 mL, 2.5 M in hexanes, 7.50 mmol) was added dropwise, and the mixture brought to room temperature and stirred for 30 minutes to give a clear orange-red solution. *Trans*-cinnamaldehyde (0.95 mL, 7.50 mmol) was added in one portion, and the mixture stirred for 40 hours. Removal of solvents *in vacuo* followed by column chromatography (100% hexanes,  $R_f$  = 0.36) affording a colourless oil (0.707 g, 4.1 mmol, 82%, *E/Z* = 1.0 : 1.7).  **$\delta\text{H}$**  (400 MHz,  $\text{CDCl}_3$ ): 7.53 – 7.29 (5H, m), 7.20 (1H, dd,  $J_1$  = 15.6 Hz,  $J_2$  = 11.2 Hz), 6.63 (1H, d,  $J$  = 15.6 Hz), 6.35 – 6.26 (1H, m), 5.68 – 5.61 (1H, m), 2.37 (2H, dt,  $J_1$  = 7.8 Hz,  $J_2$  = 7.2 Hz), 1.62 – 1.53 (2H, m), 1.07 (3H, t,  $J$  = 7.2 Hz).  **$\delta\text{C}$**  (100 MHz,  $\text{CDCl}_3$ ): 137.9, 133.2, 132.2, 129.1, 128.8, 127.5, 126.5, 126.3, 30.2, 23.1, 14.0. **IR** ( $\nu_{\text{max}}$ ,  $\text{cm}^{-1}$ ): 1595, 1492, 1449. **MS** ( $m/z$ ): Found 173.1328 ( $\text{C}_{13}\text{H}_{17}^+$  requires 173.1325).

<sup>6</sup> R. Spinam, E. Colacino, J. Martinez and F. Lamaty, *Chem. Eur. J.* 2013, **19**, 3817.

<sup>7</sup> K. E. O'Shea and C. S. Foote, *J. Org. Chem.*, 1989, **54**, 3475.

### 3-Phenyl-6-propyl-3,6-dihydro-1,2-dioxine (14e)

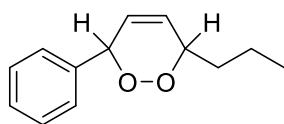

A constant stream of oxygen was passed through a solution of **16e** (0.172 g, 1.00 mmol) in CH<sub>2</sub>Cl<sub>2</sub>/MeOH (19:1, 30 mL) containing 10<sup>-4</sup> M disodium Rose Bengal whilst exposed to a 400W halogen light source for 13 hours at room temperature. After removal of solvents *in vacuo*, column chromatography (9:1 hexanes/ethyl acetate *R<sub>f</sub>* = 0.43) afforded **14e** as a pale yellow oil (0.057 g, 0.30 mmol, 28%). **<sup>1</sup>H** (400 MHz, CDCl<sub>3</sub>): 7.46 – 7.38 (5H, m), 6.18 – 6.09 (2H, m), 5.57 – 5.55 (1H, m), 4.64 – 4.62 (1H, m), 1.84 – 1.48 (4H, m), 1.00 (3H, t, *J* = 7.2 Hz) **<sup>13</sup>C** (100 MHz, CDCl<sub>3</sub>): 137.7, 128.9, 128.8, 128.7, 128.6, 126.3, 80.2, 78.3, 35.2, 18.8, 14.1. **IR** (*v*<sub>max</sub>, cm<sup>-1</sup>): 1681, 1492, 1453, 1381, 1257, 1108, 1066. **MS** (*m/z*): Found 227.1042 (C<sub>13</sub>H<sub>16</sub>O<sub>2</sub>Na<sup>+</sup> requires 227.1043).

### 2-Phenyl-5-propylfuran (15e)<sup>8</sup>

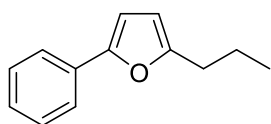

To a solution of CBr<sub>4</sub> (0.091 g, 0.27 mmol) in CH<sub>2</sub>Cl<sub>2</sub> (2.0 mL) cooled to 0 °C was added PPh<sub>3</sub> (0.072 g, 0.27 mmol) and the mixture stirred for 25 minutes. A solution of **14e** (0.051 g, 0.25 mmol) in CH<sub>2</sub>Cl<sub>2</sub> (1.0 mL) was added in one portion and stirred for 18 hours. Solvents were removed *in vacuo*, then purified by column chromatography (100% hexanes, *R<sub>f</sub>* = 0.48) affording **15e** as a colourless oil (0.036 g, 0.20 mmol, 76%). **<sup>1</sup>H** (400 MHz, CDCl<sub>3</sub>): 7.67 – 7.64 (2H, m), 7.39 – 7.35 (2H, m), 7.25 – 7.21 (1H, m), 6.57 (1H, d, *J* = 3.2 Hz), 6.08 (1H, d, *J* = 3.2 Hz), 2.68 (2H, t, *J* = 7.6 Hz), 1.79 – 1.70 (2H, m), 1.02 (3H, t, *J* = 7.2 Hz). **<sup>13</sup>C** (100 MHz, CDCl<sub>3</sub>): 156.4, 152.2, 131.4, 128.7, 126.8, 123.4, 107.1, 105.7, 30.3, 21.6, 13.9. **IR** (*v*<sub>max</sub>, cm<sup>-1</sup>): 1594, 1546, 1487, 1448, 1204, 1015. **MS** (*m/z*): Found 187.1114 (C<sub>13</sub>H<sub>15</sub>O<sup>+</sup> requires 187.1117).

### (1E)-2-Methylhepta-1,3-dien-1-ylbenzene (E/Z = 1.5 : 1.0) (16f)

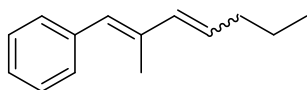

<sup>n</sup>Butyltriphenylphosphonium bromide (2.000 g, 5.00 mmol) was suspended in anhydrous THF (50 mL) and cooled to -78 °C. <sup>n</sup>BuLi (3.0 mL, 2.5 M in hexanes, 7.50 mmol) was added dropwise, and the mixture brought to room temperature and stirred for 30 minutes to give a clear orange-red solution.  $\alpha$ -methyl-*trans*-cinnamaldehyde (1.05 mL, 7.50 mmol) was added in one portion, and the mixture stirred for 18 hours. Removal of solvents *in vacuo* followed by column chromatography (100% hexanes, *R<sub>f</sub>* = 0.31) giving a colourless oil (0.654 g, 3.50 mmol, 70%, E/Z = 1.5 : 1.0). **<sup>1</sup>H** (400 MHz, CDCl<sub>3</sub>): 7.42 – 7.24 (5H, m), 6.49 (1H, s), 6.31 (1H, d, *J* = 15.6 Hz), 5.85 (1H, dt, *J*<sub>1</sub> = 15.6 Hz, *J*<sub>2</sub> = 6.8 Hz), 2.23 (2H, dt, *J*<sub>1</sub> = 6.8 Hz, *J*<sub>2</sub> = 7.2 Hz), 2.06 (3H, s), 1.58 – 1.47 (2H, m), 1.01 (3H, t, *J* = 7.6 Hz). **<sup>13</sup>C** (100 MHz, CDCl<sub>3</sub>): 138.3, 136.0, 135.5, 130.4, 129.3, 129.2, 128.2, 126.4, 35.3, 23.0, 14.1, 14.0. **IR** (*v*<sub>max</sub>, cm<sup>-1</sup>): 1598, 1492, 1443, 1379. **MS** (*m/z*): Found 187.1120 (C<sub>13</sub>H<sub>15</sub>O<sup>+</sup> requires 187.1117).

### 4-Methyl-3-phenyl-6-propyl-3,6-dihydro-1,2-dioxine (14f)

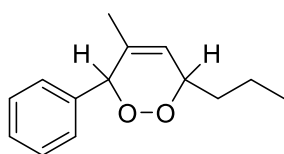

A constant stream of oxygen was passed through a solution of **16f** (0.190 g, 1.00 mmol) in CH<sub>2</sub>Cl<sub>2</sub>/MeOH (19:1, 30 mL) containing 10<sup>-4</sup> M disodium Rose Bengal whilst exposed to a 400W halogen light source for 3.5 hours at room temperature. After removal of solvents *in vacuo*, column chromatography (9:1 hexanes/ethyl acetate *R<sub>f</sub>* = 0.49) afforded **14f** as a yellow oil (0.103 g, 0.50 mmol, 47%). **<sup>1</sup>H** (400 MHz, CDCl<sub>3</sub>): 7.42 – 7.37 (5H, m), 5.87 – 5.83 (1H, m), 5.25 (1H, s), 4.77 – 4.65 (1H, m), 1.79 – 1.47 (7H, m), 1.01 (3H, t, *J* = 7.2 Hz). **<sup>13</sup>C** (100 MHz, CDCl<sub>3</sub>): 137.2, 132.7, 129.3, 128.8, 128.5, 124.2, 83.9, 78.3, 35.4, 19.1, 18.7, 14.1. **IR** (*v*<sub>max</sub>, cm<sup>-1</sup>): 1602, 1493, 1454, 1380, 1254, 1065, 1025. **MS** (*m/z*): Found 219.1377 (C<sub>14</sub>H<sub>19</sub>O<sub>2</sub><sup>+</sup> requires 219.1380).

### 3-Methyl-2-phenyl-5-propylfuran (15f)

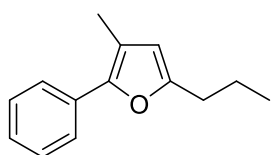

To a solution of CBr<sub>4</sub> (0.112 g, 0.34 mmol) in CH<sub>2</sub>Cl<sub>2</sub> (2.0 mL) cooled to 0 °C was added PPh<sub>3</sub> (0.089 g, 0.34 mmol) and the mixture stirred for 20 minutes. A solution of **14f** (0.067 g, 0.31 mmol) in CH<sub>2</sub>Cl<sub>2</sub> (1.0 mL) was added in one portion, the mixture brought to r.t., and stirred for 18 hours. Solvents were removed *in vacuo*, then column chromatography (100% hexanes, *R<sub>f</sub>* = 0.32) afforded **15f** as a colourless oil (0.031 g, 0.22 mmol, 72%). **<sup>1</sup>H** (400 MHz, CDCl<sub>3</sub>): 7.59 (2H, d, *J* = 7.2 Hz), 7.39 (2H, t, *J* = 7.6 Hz), 7.23 (1H, t, *J* = 7.2 Hz), 5.94 (1H, s), 2.62 (2H, t, *J* = 7.6 Hz), 2.25

<sup>8</sup> A. Padwa, J. M. Kassir and S. L. Xu, *J. Org. Chem.* 1991, **56**, 6971.

(3H, s), 1.72 – 1.68 (4H, m), 1.00 (3H, t,  $J = 7.2$  Hz). **δC** (100 MHz, CDCl<sub>3</sub>): 154.8, 146.8, 137.3, 128.5, 126.1, 125.0, 117.1, 110.8, 30.2, 21.5, 13.9, 12.1. **IR** ( $\nu_{\max}$ , cm<sup>-1</sup>): 1675, 1616, 1449, 1238. **MS** ( $m/z$ ): Found 201.1271 (C<sub>14</sub>H<sub>17</sub>O<sup>+</sup> requires 201.1274).

#### (Cyclopropylmethyl)triphenylphosphonium bromide (**26**)

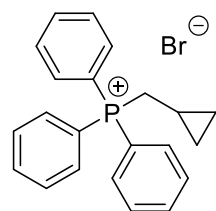

A solution of (bromomethyl)cyclopropane (0.48 mL, 5.00 mmol) and PPh<sub>3</sub> (1.570 g, 6.00 mmol) in toluene (5 mL) was heated to reflux for 16 h. After this period, the mixture was cooled, solvents removed *in vacuo*, and the residue triturated with diethyl ether (3 x 10 mL) affording a white powder (1.160 g, 2.90 mmol, 58 %). **δH** (400 MHz, CDCl<sub>3</sub>): 7.91 – 7.86 (6H, m), 7.83 – 7.75 (3H, m), 7.71 – 7.64 (6H, m), 3.96 – 3.91 (2H, m), 0.93 – 0.82 (1H, m), 0.61 – 0.53 (4H, m). **δC** (100 MHz, CDCl<sub>3</sub>): 134.9, 134.0, 130.4, 118.9, 28.1, 27.6, 6.4, 4.3. **IR** ( $\nu_{\max}$ , cm<sup>-1</sup>): 1439, 1265, 1114. **MS** ( $m/z$ ): Found 317.1455 (C<sub>22</sub>H<sub>22</sub>P<sup>+</sup> requires 317.1454).

#### ((1E)-4-cyclopropyl-2-methylbuta-1,3-dien-1-yl)benzene (*E/Z* = 1.0 : 1.2) (**16g**)

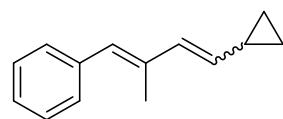

To a suspension of **26** (0.795 g, 2.00 mmol) in anhydrous THF (10 mL) cooled to -78 °C was added <sup>n</sup>BuLi (0.9 mL, 2.5 M in hexanes, 2.20 mmol) dropwise. After complete addition, the resulting mixture was brought to r.t. and allowed to stir for 1 h at room temperature.  $\alpha$ -methyl-*trans*-cinnamaldehyde (0.35 mL, 2.50 mmol) added dropwise, and the solution stirred at room temperature for 6 h. After this period, MeOH (2 mL) was added, then solvents were removed *in vacuo*, and the crude product purified by column chromatography (19:1 Hexanes/Ethyl acetate,  $R_f = 0.58$ ) to give a colourless oil (0.247 g, 1.34 mmol, 67%, *E/Z* = 1.0 : 1.2). **δH** (400 MHz, CDCl<sub>3</sub>): 7.34 – 7.20 (5H, m), 6.58 (1H, s), 5.91 (1H, d,  $J = 11.6$  Hz), 4.81 (1H, dd,  $J_1 = 11.6$  Hz,  $J_2 = 10.8$  Hz), 2.12 (3H, m), 1.53 – 1.45 (1H, m), 0.84 – 0.76 (2H, m), 0.48 – 0.41 (2H, m). **δC** (100 MHz, CDCl<sub>3</sub>): 138.3, 135.7, 134.3, 133.0, 131.9, 129.2, 128.1, 126.3, 18.8, 11.5, 8.3. **IR** ( $\nu_{\max}$ , cm<sup>-1</sup>): 1635, 1596, 1490, 1442, 1265. **MS** ( $m/z$ ): Found 185.1329 (C<sub>14</sub>H<sub>17</sub><sup>+</sup> requires 185.1325).

#### 6-Cyclopropyl-4-methyl-3-phenyl-3,6-dihydro-1,2-dioxine (**14g**)

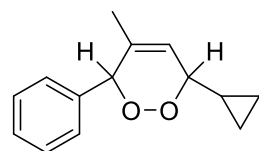

A solution of **16g** (0.184 g, 1.00 mmol) in 19:1 CH<sub>2</sub>Cl<sub>2</sub>/MeOH (30 mL) containing 10<sup>-4</sup> M methylene blue was irradiated for 2.5 h at room temperature with a 400W halogen light source, whilst a constant stream of oxygen was passed through the solution. After this period, solvents were removed *in vacuo* and the residue purified by column chromatography (9:1 hexanes/ethyl acetate,  $R_f = 0.44$ ) to give a colourless oil (0.060 g, 0.28 mmol, 28%). **δH** (400 MHz, CDCl<sub>3</sub>): 7.42 – 7.31 (5H, m), 5.91 – 5.88 (1H, m), 5.17 (1H, s), 3.90 (1H, dd,  $J_1 = 8.8$  Hz,  $J_2 = 2.0$  Hz), 1.65 (3H, s), 1.08 – 0.92 (1H, m), 0.66 – 0.32 (4H, m). **δC** (100 MHz, CDCl<sub>3</sub>): 135.7, 131.5, 127.8, 127.2, 126.9, 121.5, 82.2, 81.3, 17.5, 11.7, 1.8, 0.1. **IR** ( $\nu_{\max}$ , cm<sup>-1</sup>): 1678, 1493, 1454, 1051, 1027. **MS** ( $m/z$ ): Found 239.1044 (C<sub>14</sub>H<sub>16</sub>O<sub>2</sub>Na<sup>+</sup> requires 239.1043).

#### 5-Cyclopropyl-3-methyl-2-phenylfuran (**15g**)

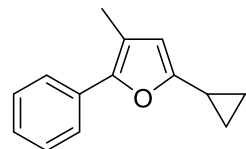

To a solution of CBr<sub>4</sub> (0.074 g, 0.22 mmol) in CH<sub>2</sub>Cl<sub>2</sub> (1.0 mL) cooled to 0 °C was added PPh<sub>3</sub> (0.059 g, 0.22 mmol). The resulting mixture was stirred for 10 min, then a solution of **14g** (0.044 g, 0.20 mmol in CH<sub>2</sub>Cl<sub>2</sub> (1.0 mL) was added. The solution was brought to r.t. and stirred for 16h. After this period, solvents were removed *in vacuo* and the crude product purified by column chromatography (19:1 hexanes/ethyl acetate,  $R_f = 0.52$ ) to give the furan as a colourless oil (0.037 g, 0.19 mmol, 93%). **δH** (400 MHz, CDCl<sub>3</sub>): 7.61 – 7.58 (2H, m), 7.42 – 7.38 (2H, m), 7.26 – 7.21 (1H, m), 5.94 (1H, s), 2.25 (3H, s), 1.95 – 1.90 (1H, m), 0.95 – 0.83 (4H, m). **δC** (100 MHz, CDCl<sub>3</sub>): 155.6, 146.3, 132.1, 128.4, 126.1, 124.8, 117.2, 109.3, 12.0, 8.8, 6.9, 6.9. **IR** ( $\nu_{\max}$ , cm<sup>-1</sup>): 1600, 1558, 1444. **MS** ( $m/z$ ): Found 221.0939 (C<sub>14</sub>H<sub>14</sub>ONa<sup>+</sup> requires 221.0937).

### (5-Ethoxy-5-oxopentyl)triphenylphosphonium bromide (**27**)

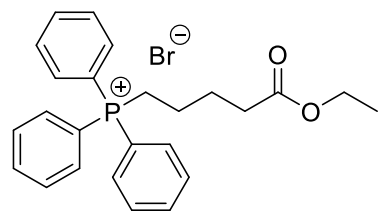

A solution of  $\text{PPh}_3$  (3.147 g, 12.00 mmol) and ethyl 6-bromohexanoate (1.8 mL, 10.0 mmol) in MeCN (20 mL) was heated to reflux for 2.5 days. After this period, the mixture was allowed to cool, triturated with diethyl ether (3 x 50 mL), then dried under vacuum to give the phosphonium salt as a white tar (4.330 g, 8.90 mmol, 89%).  **$\delta\text{H}$**  (400 MHz,  $\text{CDCl}_3$ ): 7.57 – 7.40 (12H, m), 7.10 – 6.94 (3H, m), 3.73 (2H, q,  $J = 7.2\text{ Hz}$ ), 3.48 – 3.30 (2H, m), 1.91 (2H, t,  $J = 7.6\text{ Hz}$ ), 1.42 – 1.28 (6H, m), 0.89 (3H, t,  $J = 7.2\text{ Hz}$ ).  **$\delta\text{C}$**  (100 MHz,  $\text{CDCl}_3$ ): 173.2, 133.54, 130.5, 128.4, 60.1, 33.6, 29.6, 24.2, 22.7, 22.2, 14.1. **IR** ( $\nu_{\text{max}}$ ,  $\text{cm}^{-1}$ ): 1724, 1440, 1379, 1190, 1113. **MS** ( $m/z$ ): Found 405.1980 ( $\text{C}_{26}\text{H}_{30}\text{O}_2\text{P}^+$  requires 405.1978).

### ethyl (8*E*)-8-methyl-9-phenylnona-6,8-dienoate (*E/Z* = 1.0 : 1.2) (**16h**)

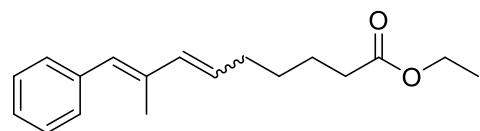

$\text{Cs}_2\text{CO}_3$  (6.516 g, 20.00 mmol) was added to a solution of **27** (2.431 g, 5.00 mmol) and  $\alpha$ -methyl-*trans*-cinnamaldehyde (0.75 mL, 5.40 mmol) in  $\text{CH}_2\text{Cl}_2$  (60 mL) and the resulting mixture heated to reflux for 24 h. After this period the mixture was allowed to cool to room temperature, Celite® (c.a. 2.0 g) was added and the mixture stirred for 10 min. The mixture was filtered under vacuum, washing with hexanes (20 mL) and solvents removed *in vacuo*. Purification by column chromatography (9:1 hexanes/ethyl acetate,  $R_f = 0.42$ ) afforded the diene as a colourless oil (1.086 g, 4.02 mmol, 80%, *E/Z* = 2.7 : 1.0).  **$\delta\text{H}$**  (400 MHz,  $\text{CDCl}_3$ ): 7.32 – 7.17 (5H, m), 6.42 (1H, s), 6.22 (1H, d,  $J = 16.0\text{ Hz}$ ), 5.75 (1H, dt,  $J_1 = 16.0\text{ Hz}$ ,  $J_2 = 6.8\text{ Hz}$ ), 4.12 (2H, q,  $J = 7.6\text{ Hz}$ ), 2.38 – 2.16 (4H, m), 1.97 (3H, s), 1.71 – 1.61 (2H, m), 1.51 – 1.41 (2H, m), 1.25 (3H, t,  $J = 7.6\text{ Hz}$ ).  **$\delta\text{C}$**  (100 MHz,  $\text{CDCl}_3$ ): 173.8, 138.2, 135.8, 135.6, 129.8, 129.5, 129.2, 128.1, 126.3, 60.3, 34.3, 32.7, 29.1, 27.7, 18.7, 14.2. **IR** ( $\nu_{\text{max}}$ ,  $\text{cm}^{-1}$ ): 1742, 1611, 1040. **MS** ( $m/z$ ): Found 295.1677 ( $\text{C}_{18}\text{H}_{24}\text{O}_2\text{Na}^+$  requires 295.1669).

### Ethyl 5-(5-methyl-6-phenyl-3,6-dihydro-1,2-dioxin-3-yl)pentanoate (**14h**)

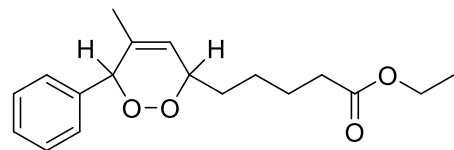

A solution of **16h** (0.273 mg, 1.01 mmol) in 19:1  $\text{CH}_2\text{Cl}_2/\text{MeOH}$  (30 mL) containing  $10^{-4}\text{ M}$  disodium Rose Bengal was irradiated for 2.5 h at room temperature with a 400W halogen light source, whilst a constant stream of oxygen was passed through the solution. After this period, solvents were removed *in vacuo* and the residue purified by column chromatography (9:1 hexanes/ethyl acetate,  $R_f = 0.20$ ) to give a colourless oil (0.112 g, 0.39 mmol, 39%).  **$\delta\text{H}$**  (400 MHz,  $\text{CDCl}_3$ ): 7.36 – 7.30 (5H, m), 5.80 (1H, m), 5.19 (1H, s), 4.58 – 4.55 (1H, m), 4.11 (2H, q,  $J = 7.2\text{ Hz}$ ), 2.30 (2H, t,  $J = 7.2\text{ Hz}$ ), 1.79 – 1.39 (9H, m), 1.24 (3H, t,  $J = 7.2\text{ Hz}$ ).  **$\delta\text{C}$**  (100 MHz,  $\text{CDCl}_3$ ): 173.7, 137.0, 133.0, 129.4, 128.9, 128.6, 124.0, 84.0, 78.3, 60.3, 34.3, 33.0, 25.1, 25.0, 19.1, 14.3. **IR** ( $\nu_{\text{max}}$ ,  $\text{cm}^{-1}$ ): 1741, 1448, 1374, 1241, 1047. **MS** ( $m/z$ ): Found 327.1577 ( $\text{C}_{18}\text{H}_{24}\text{O}_4\text{Na}^+$  requires 327.1567).

### Ethyl 5-(4-methyl-5-phenylfuran-2-yl)pentanoate (**15h**)

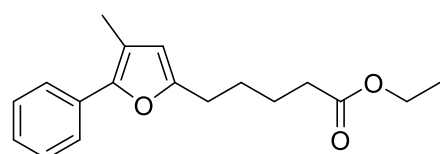

To a solution of  $\text{CBr}_4$  (0.092 g, 0.28 mmol) in  $\text{CH}_2\text{Cl}_2$  (2.0 mL) at  $0\text{ }^\circ\text{C}$  was added  $\text{PPh}_3$  (0.073 g, 0.28 mmol), and the mixture stirred for 10 min. After this period, a solution of **14h** (0.072 g, 0.25 mmol) in  $\text{CH}_2\text{Cl}_2$  (1.0 mL) was added. The resulting mixture was heated to reflux for 30 h, then the mixture cooled, solvents removed *in vacuo*, and purified by column chromatography (9:1 hexanes/ethyl acetate,  $R_f = 0.33$ ). The pure furan was obtained as a yellow oil (0.064 g, 0.24 mmol, 94%).  **$\delta\text{H}$**  (400 MHz,  $\text{CDCl}_3$ ): 7.61 – 7.58 (2H, m), 7.41 – 7.37 (2H, m), 7.25 – 7.20 (1H, m), 5.96 (1H, s), 4.14 (2H, q,  $J = 7.2\text{ Hz}$ ), 2.69 – 2.65 (2H, m), 2.38 – 2.33 (2H, m), 2.24 (3H, s), 1.77 – 1.68 (2H, m), 1.26 (3H, t,  $J = 7.6\text{ Hz}$ ).  **$\delta\text{C}$**  (100 MHz,  $\text{CDCl}_3$ ): 173.7, 154.2, 147.0, 132.2, 128.5, 126.2, 125.0, 117.1, 111.0, 60.4, 34.2, 27.8, 27.7, 24.6, 14.3, 12.1. **IR** ( $\nu_{\text{max}}$ ,  $\text{cm}^{-1}$ ): 1728, 1604, 1558, 1443, 1373, 1180. **MS** ( $m/z$ ): Found 309.1464 ( $\text{C}_{18}\text{H}_{22}\text{O}_3\text{Na}^+$  requires 309.1461).

### (3-Hydroxypropyl)triphenylphosphonium bromide (**28**)

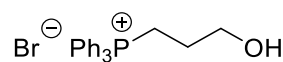

A solution of 3-bromo-1-propanol (2.25 mL, 25.00 mmol) and  $\text{PPh}_3$  (7.213 g, 27.50 mmol) in toluene (10 mL) was heated to reflux for 16 hours. After this period the mixture was cooled to room temperature, triturated with diethyl ether (3 x 50 mL), and dried under vacuum affording the phosphonium salt as a white powder (9.887 g, 24.80 mmol, 99%). **MP** = 220.2 – 223.8  $^\circ\text{C}$ .  **$\delta\text{H}$**  (400 MHz,  $\text{CDCl}_3$ ): 7.92 – 7.65 (15H,



m), 3.93 – 3.75 (4H, m), 3.35 (1H, s (br)), 1.90 – 1.79 (2H, m). **δC** (100 MHz, CDCl<sub>3</sub>): 135.1, 133.6, 130.6, 118.5, 60.3, 25.9, 20.2. **IR** (ν<sub>max</sub>, cm<sup>-1</sup>): 3314 (br), 2305, 1439, 1264, 1112, 896, 737. **MS** (m/z): Found 321.1397 (C<sub>21</sub>H<sub>22</sub>OP<sup>+</sup> requires 321.1403).

### (3-((*tert*-Butyldimethylsilyl)oxy)propyl)triphenylphosphonium bromide (**29**)

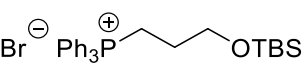 To a solution of **28** (4.013 g, 10.00 mmol) and imidazole (0.749 g, 11.00 mmol) in CH<sub>2</sub>Cl<sub>2</sub> (30 mL) was added a solution of TBSCl (1.658 g, 11.00 mmol) in CH<sub>2</sub>Cl<sub>2</sub> (10 mL) dropwise. The resulting mixture was stirred at room temperature for 16 h, solvents removed *in vacuo*, then triturated with Et<sub>2</sub>O (3 x 100 mL). Removal of residual solvent *in vacuo* afforded the phosphonium salt as a white powder (4.627 g, 9.00 mmol, 90%). **MP** = 107.5 – 111.8 °C. **δH** (400 MHz, CDCl<sub>3</sub>): 7.84 – 7.63 (15H, m), 3.83 – 3.69 (4H, m), 1.90 – 1.76 (2H, m), 0.09 (9H, s), 0.04 (6H, s). **δC** (100 MHz, CDCl<sub>3</sub>): 135.4, 133.7, 133.4, 130.7, 118.7, 60.3, 26.0, 19.7, -3.5, -5.3. **IR** (ν<sub>max</sub>, cm<sup>-1</sup>): 2306, 1440, 1265, 1113, 998, 743. **MS** (m/z): Found 435.2260 (C<sub>27</sub>H<sub>36</sub>SiOP<sup>+</sup> requires 435.2268).

### (*Z*)-*tert*-Butyl(hexa-3,5-dien-1-yloxy)dimethylsilane (**16i**)

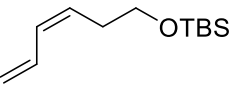 To a suspension of **29** (1.547 g, 3.00 mmol) in anhydrous THF (20 mL) cooled to -78 °C was added KHMDS (6.0 mL, 0.5 M in toluene, 3.00 mmol) dropwise. The mixture was brought to room temperature and stirred for 1 hour, then cooled to -78 °C and acrolein (0.30 mL, 4.50 mmol) added. The mixture was stirred for 1 h at -78 °C, then brought to room temperature and stirred for a further 2 hours. The mixture was concentrated *in vacuo* (ca. 5 mL), diluted with hexanes (30 mL), washed with water (3 x 25 mL), dried over MgSO<sub>4</sub>, filtered, and solvents removed *in vacuo*. Column chromatography (9:1 hexanes/ethyl acetate R<sub>f</sub> = 0.73) afforded a yellow oil (0.326 g, 1.53 mmol, 51%). **δH** (400 MHz, CDCl<sub>3</sub>): 6.63 (1H, ddd, J<sub>1</sub> = 17.2 Hz, J<sub>2</sub> = 12.4 Hz, J<sub>3</sub> = 10.0 Hz), 6.06 (1H, dd, J<sub>1</sub> = 12.4 Hz, J<sub>2</sub> = 10.0 Hz), 5.46 (1H, dt, J<sub>1</sub> = 10.0 Hz, J<sub>2</sub> = 8.0 Hz), 5.20 (1H, d, J = 17.2 Hz), 5.09 (1H, d, J = 10.0 Hz), 3.66 (2H, t, J = 5.6 Hz), 2.3 (2H, dt, J<sub>1</sub> = 8.0 Hz, J<sub>2</sub> = 5.6 Hz), 0.88 (9H, s), 0.10 (6H, s). **δC** (100 MHz, CDCl<sub>3</sub>): 132.4, 130.9, 128.7, 117.4, 62.8, 31.6, 26.0, 18.4, -5.2. **IR** (ν<sub>max</sub>, cm<sup>-1</sup>): 1676, 1590, 1255, 1118. **MS** (m/z): Found 235.1491 (C<sub>12</sub>H<sub>24</sub>SiONa<sup>+</sup> requires 235.1489).

### *tert*-Butyl(2-(3,6-dihydro-1,2-dioxin-3-yl)ethoxy)dimethylsilane (**14i**)

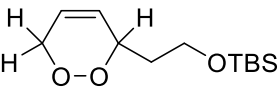 A constant stream of oxygen was passed through a solution of **16i** (0.101 g, 0.47 mmol) in CH<sub>2</sub>Cl<sub>2</sub>/MeOH (19:1, 30 mL) containing 10<sup>-4</sup> M disodium Rose Bengal whilst irradiated with a 400W halogen light source for 30 hours. After this period, solvents were removed *in vacuo* and the crude product purified by column chromatography (9:1 hexanes/ethyl acetate R<sub>f</sub> = 0.52) affording a colourless oil (0.036 g, 0.15 mmol, 31%). **δH** (400 MHz, CDCl<sub>3</sub>): 6.00 – 5.95 (2H, m), 4.77 – 4.73 (1H, m), 4.57 – 4.53 (2H, m), 3.82 – 3.71 (2H, m), 1.94 – 1.75 (2H, m), 0.91 (9H, s), 0.03 (6H, s). **δC** (100 MHz, CDCl<sub>3</sub>): 128.2, 123.9, 75.8, 69.9, 59.1, 35.8, 25.9, 18.3, -5.4. **IR** (ν<sub>max</sub>, cm<sup>-1</sup>): 1683, 1471, 1257, 1096. **MS** (m/z): Found 267.1381 (C<sub>12</sub>H<sub>24</sub>SiO<sub>3</sub>Na<sup>+</sup> requires 267.1387).

### *tert*-Butyl(2-(furan-2-yl)ethoxy)dimethylsilane (**15i**)<sup>9</sup>

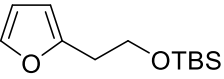 A solution of CBr<sub>4</sub> (0.060 g, 0.18 mmol) in CH<sub>2</sub>Cl<sub>2</sub> (1.0 mL) was cooled to 0 °C and PPh<sub>3</sub> (0.047 g, 0.18 mmol) added. The mixture was stirred for 20 minutes, then a solution of **14i** (0.039 g, 0.16 mmol) in CH<sub>2</sub>Cl<sub>2</sub> (1.0 mL) was added in one portion. The solution was brought to room temperature and stirred with TLC monitoring. After 18 h solvents were removed *in vacuo*. Column chromatography (19:1 hexanes/ethyl acetate R<sub>f</sub> = 0.54) afforded a colourless oil (0.034 g, 0.15 mmol, 95%). **δH** (400 MHz, CDCl<sub>3</sub>): 7.31 – 7.30 (1H, m), 6.29 – 6.28 (1H, m), 6.06 – 6.05 (1H, m), 3.85 (2H, t, J = 7.2 Hz), 2.85 (2H, t, J = 7.2 Hz), 0.87 (9H, s), 0.01 (6H, s). **δC** (100 MHz, CDCl<sub>3</sub>): 153.4, 141.0, 110.3, 106.2, 61.7, 32.0, 26.0, 18.4, -5.4. **IR** (ν<sub>max</sub>, cm<sup>-1</sup>): 1599, 1507, 1472, 1255, 1105, 1005. **MS** (m/z): Found 249.1285 (C<sub>12</sub>H<sub>22</sub>SiO<sub>2</sub>Na<sup>+</sup> requires 249.1281).

<sup>9</sup> F. Loiseau, J. –M. Simone, D. Carcache, P. Bobal and R. Neier, *Monatsh. Chem.* 2007, **138**, 121.

### **tert-Butyldimethyl(((5E)-5-methyl-6-phenylhexa-3,5-dien-1-yl)oxy)silane (E/Z = 2 : 1) (16j)**

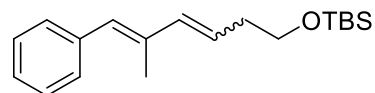

To a suspension of **29** (5.150 g, 10.0 mmol) in anhydrous THF (50 mL) cooled to -78 °C was added <sup>n</sup>BuLi (6.0 mL, 2.5 M in hexanes, 15.00 mmol) dropwise. After complete addition, the resulting mixture was brought to r.t. and allowed to stir for 1 h, then α-methyl-*trans*-cinnamaldehyde (3.0 mL, 20.0.0 mmol) added dropwise, and the solution stirred for 12h. After this period, MeOH (10 mL) was added, solvents removed *in vacuo*, and the crude product purified by column chromatography (19:1 Hexanes/Ethyl acetate, *R*<sub>f</sub> = 0.38) affording a colourless oil (2.080 g, 7.80 mmol, 78%, E/Z = 2 : 1). **δH** (400 MHz, CDCl<sub>3</sub>): 7.38 – 7.23 (5H, m), 6.47 (1H, s), 6.29 (1H, d, *J* = 15.6Hz), 5.79 (1H, dt, *J*<sub>1</sub> = 15.6Hz, *J*<sub>2</sub> = 6.8 Hz), 3.73 (2H, t, *J* = 7.2Hz), 2.42 (2H, dt, *J*<sub>1</sub> = 6.8Hz, *J*<sub>2</sub> = 7.2Hz), 2.01 (3H, s), 0.92 (9H, s), 0.10 (6H, s). **δC** (100 MHz, CDCl<sub>3</sub>): 138.1, 137.0, 135.8, 134.9, 129.7, 129.2, 128.0, 126.4, 63.2, 36.6, 26.0, 18.4, 13.9, -5.2. **IR** (*v*<sub>max</sub>, cm<sup>-1</sup>): 1604, 1472, 1387, 1360, 1254, 1100. **MS** (*m/z*): Found 325.1962 (C<sub>19</sub>H<sub>30</sub>SiONa<sup>+</sup> requires 325.1958).

### **tert-Butyldimethyl(2-(5-methyl-6-phenyl-3,6-dihydro-1,2-dioxin-3-yl)ethoxy)silane (14j)**

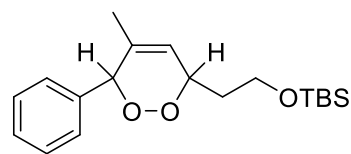

A constant stream of oxygen was passed through a solution of **16j** (0.303 g, 1.00 mmol) in CH<sub>2</sub>Cl<sub>2</sub>/MeOH (19:1, 30 mL) containing 10<sup>-4</sup> M methylene blue, under irradiation from a 400W halogen light source for 5 hours. After this period, solvents were removed *in vacuo* and the crude product purified by column chromatography (9:1 hexanes/ethyl acetate *R*<sub>f</sub> = 0.35) affording a colourless oil (0.129 g, 0.38 mmol, 38%). **δH** (400 MHz, CDCl<sub>3</sub>): 7.40 – 7.38 (5H, m), 5.91 – 5.90 (1H, m), 5.33 (1H, s), 4.90 – 4.78 (1H, m), 3.85 – 3.80 (2H, m), 2.09 – 1.82 (2H, m), 1.62 (3H, s), 0.95 (9H, s), 0.12 (6H, s). **δC** (100 MHz, CDCl<sub>3</sub>): 136.7, 132.9, 129.3, 128.9, 128.5, 124.2, 84.1, 75.5, 59.3, 36.4, 26.0, 18.9, 18.4, -5.3. **IR** (*v*<sub>max</sub>, cm<sup>-1</sup>): 1471, 1455, 1387, 1255, 1095. **MS** (*m/z*): Found 357.1859 (C<sub>19</sub>H<sub>30</sub>SiO<sub>3</sub>Na<sup>+</sup> requires 357.1856).

### **tert-Butyldimethyl(2-(4-methyl-5-phenylfuran-2-yl)ethoxy)silane (15j)**

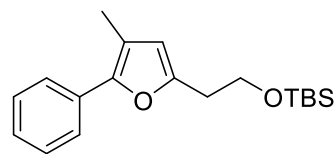

To a solution of CBr<sub>4</sub> (0.054 g, 0.16 mmol) in CH<sub>2</sub>Cl<sub>2</sub> (1.0 mL) at 0 °C was added PPh<sub>3</sub> (0.043 g, 0.16 mmol), and the mixture stirred for 10 min. After this period, a solution of **14j** (0.050 mg, 0.15 mmol) in CH<sub>2</sub>Cl<sub>2</sub> (1.0 mL) was added, and the mixture brought to r.t. The resulting mixture was allowed to stir for 16 h, then solvents removed *in vacuo*, and purified by column chromatography (9:1 hexanes/ethyl acetate, *R*<sub>f</sub> = 0.57). The pure furan was obtained as a pale yellow oil (0.030 g, 0.09 mmol, 63%). **δH** (400 MHz, CDCl<sub>3</sub>): 7.62 – 7.60 (2H, m), 7.43 – 7.39 (2H, m), 2.28 – 7.25 (1H, m), 6.03 (1H, s), 3.91 (2H, t, *J* = 6.8 Hz), 2.89 (2H, t, *J* = 6.8 Hz), 2.26 (3H, s), 0.91 (9H, s), 0.06 (6H, s). **δC** (100 MHz, CDCl<sub>3</sub>): 151.5, 147.1, 132.2, 128.5, 126.2, 125.0, 117.1, 112.1, 61.8, 32.0, 25.9, 18.6, 12.0, -5.4. **IR** (*v*<sub>max</sub>, cm<sup>-1</sup>): 1471, 1455, 1387, 1256, 1096. **MS** (*m/z*): Found 339.1757 (C<sub>19</sub>H<sub>28</sub>SiO<sub>2</sub>Na<sup>+</sup> requires 339.1751).

### **5-(2-Bromoethyl)-3-methyl-2-phenylfuran (15j')**

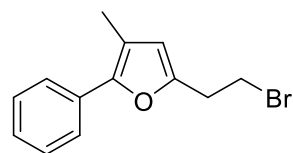

To a solution of CBr<sub>4</sub> (0.292 g, 0.88 mmol) in CH<sub>2</sub>Cl<sub>2</sub> (3.0 mL) at 0 °C was added PPh<sub>3</sub> (0.232 g, 0.88 mmol), and the mixture stirred for 10 min. After this period, a solution of **14j** (0.130 g, 0.40 mmol) in CH<sub>2</sub>Cl<sub>2</sub> (2.0 mL) was added. The resulting mixture heated to reflux for 16 h, cooled, then solvents removed *in vacuo*, and purified by column chromatography (9:1 hexanes/ethyl acetate, *R*<sub>f</sub> = 0.81). The pure furan was obtained as a pale yellow oil (0.097 g, 0.36 mmol, 91%). **δH** (400 MHz, CDCl<sub>3</sub>): 7.71 – 7.61 (2H, m), 7.48 – 7.41 (2H, m), 7.31 – 7.26 (1H, m), 6.12 (1H, s), 3.65 (2H, t, *J* = 7.2 Hz), 3.25 (2H, t, *J* = 7.2 Hz), 2.30 (3H, s). **δC** (100 MHz, CDCl<sub>3</sub>): 150.6, 147.8, 131.8, 128.5, 126.5, 125.1, 117.1, 112.5, 31.9, 29.8, 11.9. **IR** (*v*<sub>max</sub>, cm<sup>-1</sup>): 1679, 1600, 1551, 1491, 1378, 1071. **MS** (*m/z*): Found 287.0049 (C<sub>13</sub>H<sub>13</sub>BrONa<sup>+</sup> requires 287.0042).

### **(E)-2-Methylnona-1,3-diene (16k)**

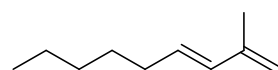

To a suspension of methyltriphenylphosphonium bromide (0.720 g, 2.00 mmol) in anhydrous THF (20 mL) cooled to -78 °C was added <sup>n</sup>BuLi (1.0 mL, 2.5 M in hexanes, 2.50 mmol) dropwise. After complete addition, the mixture was brought to r.t. and stirred for 1 h, then 3-nonen-2-one (0.41 mL, 2.50 mmol) added dropwise. The resulting mixture was allowed to stir at room

temperature for 2h, then MeOH (2 mL) was added, solvents removed *in vacuo*, and the crude product purified by column chromatography (100% hexanes,  $R_f$  = 0.70). The pure diene was obtained as a colourless oil (0.133 mg, 0.96 mmol, 49%).  **$\delta H$**  (400 MHz,  $CDCl_3$ ): 6.16 (1H, d,  $J$  = 15.6 Hz), 5.69 (1H, dt,  $J_1$  = 15.6 Hz,  $J_2$  = 6.8 Hz), 4.89 (2H, s), 2.14 (2H, dt,  $J_1$  = 6.8 Hz,  $J_2$  = 8.4 Hz), 1.86 (3H, s), 1.46 – 1.31 (6H, m), 0.92 (3H, t,  $J$  = 7.6 Hz).  **$\delta C$**  (100 MHz,  $CDCl_3$ ): 142.3, 132.7, 131.2, 114.1, 32.8, 31.5, 29.1, 22.6, 18.7, 14.1, 12.5. **IR** ( $\nu_{max}$ ,  $cm^{-1}$ ): 1647, 1609, 1455, 1437, 1377. **MS** ( $m/z$ ): Found 137.1327 ( $C_{10}H_{17}^+$  requires 137.1325).

#### 5-Methyl-3-pentyl-3,6-dihydro-1,2-dioxine (14k)

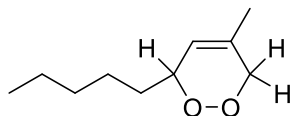

A solution of **16k** (0.133 g, 0.96 mmol) in 19:1  $CH_2Cl_2$ /MeOH (30 mL) containing  $10^{-4}$  M disodium Rose Bengal was irradiated for 20 h at room temperature with a 400W halogen light source, whilst a constant stream of oxygen was passed through the solution. After this period, solvents were removed *in vacuo* and the residue purified by column chromatography (9:1 hexanes/ethyl acetate,  $R_f$  = 0.44) to give a colourless oil (0.084 g, 0.49 mmol, 51%).  **$\delta H$**  (400 MHz,  $CDCl_3$ ): 5.54 – 5.52 (1H, m), 4.94 – 4.46 (1H, m), 4.41 (1H, d,  $J$  = 15.6 Hz), 4.21 (1H, d,  $J$  = 15.6 Hz), 1.67 (3H, s), 1.57 – 1.30 (8H, m), 0.85 (3H, t,  $J$  = 7.2 Hz).  **$\delta C$**  (100 MHz,  $CDCl_3$ ): 131.4, 122.1, 78.3, 72.8, 32.9, 31.8, 24.8, 22.5, 18.0, 14.0. **IR** ( $\nu_{max}$ ,  $cm^{-1}$ ): 1682, 1450, 1380, 1175, 1066, 1021. **MS** ( $m/z$ ): Found 193.1204 ( $C_{10}H_{18}O_2Na^+$  requires 193.1199).

#### 4-Methyl-2-pentylfuran (15k)<sup>10</sup>

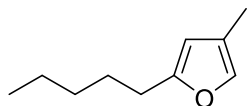

To a solution of  $CBr_4$  (0.179 g, 0.54 mmol) in  $CH_2Cl_2$  (3.0 mL) cooled to 0 °C was added  $PPh_3$  (0.141 g, 0.54 mmol) and the mixture stirred for 10 minutes. A solution of **14k** (0.084 g, 0.49 mmol) in  $CH_2Cl_2$  (2.0 mL) was added in one portion and stirred for 16 hours. Solvents were removed *in vacuo*, and the crude product purified by column chromatography (100% hexanes,  $R_f$  = 0.74) afforded **15k** as a colourless oil (0.062 g, 0.41 mmol, 83%).  **$\delta H$**  (400 MHz,  $CDCl_3$ ): 7.08 (1H, s), 5.87 (1H, s), 2.58 (2H, t,  $J$  = 7.6 Hz), 2.01 (3H, s), 1.67 – 1.59 (2H, m), 1.36 – 1.28 (4H, m), 0.92 (3H, t,  $J$  = 7.2 Hz).  **$\delta C$**  (100 MHz,  $CDCl_3$ ): 156.7, 137.2, 120.4, 107.4, 31.4, 29.7, 28.1, 27.7, 22.5, 14.0, 9.9. **IR** ( $\nu_{max}$ ,  $cm^{-1}$ ): 1643, 1553, 1468, 1381, 1167, 1096. **MS** ( $m/z$ ): Found 153.1278 ( $C_{10}H_{17}O^+$  requires 153.1274).

#### (8E)-7-Methyltetradeca-6,8-diene (E/Z = 2.9 : 1.0) (16l)

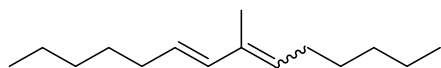

To a suspension of  $n$ hexyltriphenylphosphonium bromide (2.140 g, 5.00 mmol) in anhydrous THF (50 mL) cooled to -78 °C was added  $n$ BuLi (2.0 mL, 2.5 M in hexanes, 5.00 mmol) dropwise, the mixture brought to r.t. and stirred for 1 h. After this period, 3-nonen-2-one (0.83 mL, 5.00 mmol) was added dropwise to the ylide solution, and the solution stirred at room temperature for 2 h. MeOH (5 mL) was added, solvents were removed *in vacuo*, and the product purified by column chromatography (100% hexanes,  $R_f$  = 0.62). The diene was obtained as a pale yellow oil (0.636 mg, 3.10 mmol, 61%, E/Z = 2.9 : 1.0).  **$\delta H$**  (400 MHz,  $CDCl_3$ ): 6.08 (1H, d,  $J$  = 15.6 Hz), 5.58 (1H, dt,  $J_1$  = 15.6 Hz,  $J_2$  = 6.8 Hz), 5.40 (1H, t,  $J$  = 7.6 Hz), 2.17 – 2.08 (4H, m), 1.75 (3H, s), 1.47 – 1.29 (12H, m), 0.94 – 0.92 (6H, m).  **$\delta C$**  (100 MHz,  $CDCl_3$ ): 134.7, 133.4, 130.7, 127.6, 32.9, 31.6, 31.6, 29.4, 29.4, 28.1, 22.7, 22.6, 14.1, 14.1, 12.4. **IR** ( $\nu_{max}$ ,  $cm^{-1}$ ): 1643, 1466, 1379, 1097. **MS** ( $m/z$ ): Found 209.2265 ( $C_{15}H_{29}^+$  requires 209.2265).

#### 4-Methyl-3,6-dipentyl-3,6-dihydro-1,2-dioxine (14l)

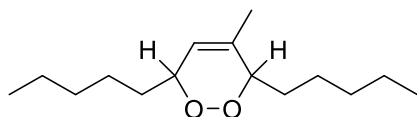

A solution of **16l** (0.416 g, 2.00 mmol) in 19:1  $CH_2Cl_2$ /MeOH (30 mL) containing  $10^{-4}$  M disodium Rose Bengal was irradiated for 18 h at room temperature with a 400W halogen light source, whilst a constant stream of oxygen was passed through the solution. After this period, solvents were removed *in vacuo* and the residue purified by column chromatography (9:1 hexanes/ethyl acetate,  $R_f$  = 0.52) to give a colourless oil (0.240 g, 1.00 mmol, 50%).  **$\delta H$**  (400 MHz,  $CDCl_3$ ): 5.53 (1H, m), 4.49 (1H, m), 4.25 (1H, m), 1.75 – 1.28 (19H, m), 0.92 (3H, t,  $J$  =

<sup>10</sup> D. Kalaitzakis, T. Montagnon, I. Alexopoulou and G. Vassilikogiannakis, *Angew. Chem. Int. Ed.* 2012, **51**, 8868.

6.8Hz), 0.90 (3H, t,  $J = 6.8$ Hz).  **$\delta$ C** (100 MHz,  $\text{CDCl}_3$ ): 134.5, 122.6, 81.8, 78.2, 33.0, 33.0, 31.8, 31.8, 25.5, 25.5, 22.6, 22.6, 18.9, 14.0, 14.0. **IR** ( $\nu_{\text{max}}$ ,  $\text{cm}^{-1}$ ): 1467, 1380, 1056. **MS** ( $m/z$ ): Found 263.1987 ( $\text{C}_{15}\text{H}_{28}\text{O}_2\text{Na}^+$  requires 263.1982).

### 3-Methyl-2,5-dipentylfuran (15I)

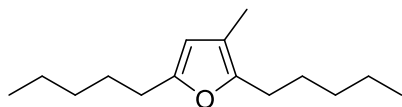

To a solution of  $\text{CBr}_4$  (0.365 g, 1.10 mmol) in  $\text{CH}_2\text{Cl}_2$  (7.0 mL) cooled to  $0^\circ\text{C}$  was added  $\text{PPh}_3$  (0.289 g, 1.1 mmol) and the resulting mixture stirred for 10 minutes. After this period, a solution of **14I** (0.239 g, 1.00 mmol) in  $\text{CH}_2\text{Cl}_2$  (3.0 mL) was added, the solution brought to r.t., and stirred for 16h. Solvents were removed

*in vacuo*, and the crude product purified by column chromatography (9:1 hexanes/ethyl acetate,  $R_f = 0.70$ ). The furan was obtained as a colourless oil (0.160 g, 0.72 mmol, 72%).  **$\delta$ H** (400 MHz,  $\text{CDCl}_3$ ): 5.76 (1H, s), 2.54 (2H, t,  $J = 8.0$  Hz), 2.53 (2H, t,  $J = 7.6$  Hz), 1.93 (3H, s), 1.66 – 1.56 (4H, m), 1.39 – 1.28 (8H, m), 0.94 – 0.90 (6H, m).  **$\delta$ C** (100 MHz,  $\text{CDCl}_3$ ): 153.5, 149.4, 113.8, 107.6, 31.5, 31.4, 28.5, 28.0, 27.9, 25.9, 22.5, 22.5, 14.1, 14.0, 9.9. **IR** ( $\nu_{\text{max}}$ ,  $\text{cm}^{-1}$ ): 1637, 1576, 1466, 1379, 1219. **MS** ( $m/z$ ): Found 223.2062 ( $\text{C}_{15}\text{H}_{27}\text{O}^+$  requires 223.2056).

### (E)-3-Methylnon-3-en-2-one (30)

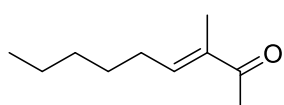

Hexanal (6.0 mL, 50.0 mmol) was added dropwise to a vigorously stirred biphasic mixture of butanone (20 mL, 0.22 mol) and aqueous NaOH (15 mL, 10% w/v) over a 1 h period. After complete addition, the mixture was stirred at room temperature for 60 h, then the layers separated and the aqueous layer extracted into ethyl acetate (2 x 20 mL). Combined

organics were dried over  $\text{MgSO}_4$ , filtered, and solvents removed *in vacuo* to give a colourless oil. Aqueous HBr (2 drops, 40% w/v), and the mixture distilled to obtain the crude, wet enone as a colourless oil. The distillate was diluted with ethyl acetate (20 mL), dried over  $\text{MgSO}_4$ , filtered, and solvents removed *in vacuo* affording a colourless oil (5.694 g, 40.10 mmol, 80%).  **$\delta$ H** (400 MHz,  $\text{CDCl}_3$ ): 6.65 – 6.61 (1H, t,  $J = 7.2$ Hz), 2.30 (3H, s), 2.23 (2H, dt,  $J_1 = 7.2$ Hz,  $J_2 = 7.6$  Hz), 1.76 (3H, s), 1.50 – 1.43 (2H, m), 1.37 – 1.27 (4H, m), 0.90 (3H, t,  $J = 7.2$  Hz).  **$\delta$ C** (100 MHz,  $\text{CDCl}_3$ ): 200.1, 144.1, 137.7, 31.7, 29.2, 28.4, 25.5, 22.6, 14.1, 11.2. **IR** ( $\nu_{\text{max}}$ ,  $\text{cm}^{-1}$ ): 1669, 1641, 1459, 1366. **MS** ( $m/z$ ): Found 153.1434 ( $\text{C}_{10}\text{H}_{19}\text{O}^+$  requires 155.1430).

### (6E,8E)-7,8-Dimethyltetradeca-6,8-diene (16)

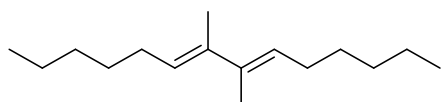

$^n\text{BuLi}$  (2.2 mL, 2.3 M in hexanes, 5.00 mmol) was added dropwise to a suspension of  $^n\text{hexyltriphenylphosphonium bromide}$  (2.141 g, 5.00 mmol) in anhydrous THF (50 mL) cooled to  $-78^\circ\text{C}$ . After complete addition, the mixture

was brought to r.t. and allowed to stir for 1 h, then **30** (0.770 g, 5.00 mmol) added dropwise and the resulting mixture stirred at room temperature for 2 h. MeOH (5 mL) was added to the solution, solvents were removed *in vacuo*, and the crude product purified by column chromatography (100% hexanes,  $R_f = 0.60$ ) to give a colourless oil (0.660 g, 3.10 mmol, 63%).  **$\delta$ H** (400 MHz,  $\text{CDCl}_3$ ): 5.16 – 5.10 (2H, m), 2.23 – 1.97 (4H, m), 1.76 (3H, s), 1.67 (3H, s), 1.43 – 1.32 (12H, m), 0.92 – 0.85 (6H, m).  **$\delta$ C** (100 MHz,  $\text{CDCl}_3$ ): 140.0, 135.2, 127.1, 125.3, 31.6, 31.6, 30.1, 29.4, 28.9, 27.8, 23.4, 22.6, 22.6, 15.6, 14.1, 14.1. **IR** ( $\nu_{\text{max}}$ ,  $\text{cm}^{-1}$ ): 1641, 1466, 1377. **MS** ( $m/z$ ): Found 221.2270 ( $\text{C}_{16}\text{H}_{29}^+$  requires 221.2264).

### (3R,4S,6S)-4-Hydroperoxy-4-methyl-5-methylene-3,6-dipentyl-1,2-dioxane (18)

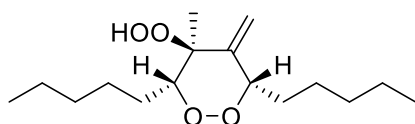

A solution of **16** (0.140 g, 0.63 mmol) in 19:1  $\text{CH}_2\text{Cl}_2/\text{MeOH}$  (30 mL) containing  $10^{-4}$  M disodium Rose Bengal was irradiated for 2.5 h at room temperature with a 400W halogen light source, whilst a constant stream of oxygen was passed through the solution. After this period, solvents were removed *in vacuo* and the

residue purified by column chromatography (9:1 hexanes/ethyl acetate,  $R_f = 0.27$ ) to give a colourless oil (0.155 g, 0.54 mmol, 86%).  **$\delta$ H** (400 MHz,  $\text{CDCl}_3$ ): 8.00 (1H, s), 5.32 (1H, t,  $J = 6.8$  Hz), 5.26 (1H, s), 4.97 (1H, d,  $J = 2$ Hz), 4.45 (1H, t,  $J = 6.8$ Hz), 2.00 (2H, m), 1.81 (3H, s), 1.55 – 1.21 (14H, m), 0.86 (3H, t,  $J = 7.2$ Hz), 0.86 (3H, t,  $J = 7.2$ Hz).  **$\delta$ C** (100 MHz,  $\text{CDCl}_3$ ): 148.5, 134.9, 129.6, 113.6, 87.4, 32.4, 31.8, 31.7, 30.0, 29.2, 25.6, 24.1, 22.7, 22.6, 14.1, 14.1. **IR** ( $\nu_{\text{max}}$ ,  $\text{cm}^{-1}$ ): 3402 (br), 1636, 1458, 1373, 1064. **MS** ( $m/z$ ): Found 309.2036 ( $\text{C}_{16}\text{H}_{30}\text{O}_4\text{Na}^+$  requires 309.2036).

### 11-Chloroundec-1-ene (20)

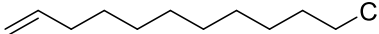 To a mixture of 10-undecen-1-ol (10.0 mL, 49.80 mmol) and pyridine (2.0 mL, 24.80 mmol) under a nitrogen atmosphere was added thionyl chloride (7.2 mL, 99.30 mmol) dropwise over a 1 h period. After complete addition, the resulting mixture was heated to 65°C for 2 h, after which the mixture was cooled and water (25 mL) was added slowly to quench the residual thionyl chloride. The mixture was extracted into ethyl acetate (3 x 25 mL), the combined organics were washed sequentially with 2M HCl solution (10 mL), saturated NaHCO<sub>3</sub> (3 x 10mL), and brine (10 mL). The organics were dried over MgSO<sub>4</sub>, filtered, and solvents removed *in vacuo* to afford a yellow oil. The crude oil was dissolved in hexanes (100 mL), and filtered through a short plug of silica. Removal of solvents *in vacuo* gave the pure compound as a colourless oil (8.506 g, 45.14 mmol, 90%).  **$\delta$ H** (400 MHz, CDCl<sub>3</sub>): 5.86 – 5.76 (1H, m), 5.02 – 4.91 (2H, m), 3.53 (2H, t,  $J$  = 6.8Hz), 2.06 – 2.01 (2H, m), 1.80 – 1.74 (2H, m), 1.44 – 1.28 (12H, m).  **$\delta$ C** (100 MHz, CDCl<sub>3</sub>): 139.3, 114.2, 45.3, 33.9, 32.7, 29.5, 29.5, 29.2, 29.0, 29.0, 27.0. **IR** ( $\nu_{\max}$ , cm<sup>-1</sup>): 1640, 1465.

### Triphenyl(undec-10-en-1-yl)phosphonium chloride (21)

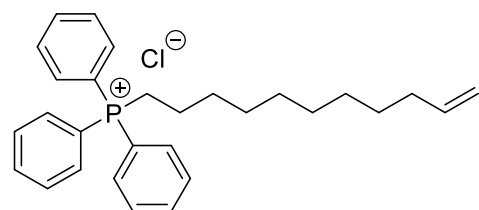

PPh<sub>3</sub> (13.088 g, 49.90 mmol) was dissolved in **20** (8.486 g, 45.00 mmol) in a sealed tube under an atmosphere of nitrogen. The solution was heated to 250°C for 3 days, at which point the hot mixture was poured into a beaker and allowed to cool. The crude phosphonium salt was triturated with diethyl ether (3 x 100 mL), then dried under vacuum to afford the phosphonium salt as a pale yellow tar (15.834 g, 35.12 mmol, 78%).  **$\delta$ H**

(400 MHz, CDCl<sub>3</sub>): 7.87 – 7.64 (15H, m), 5.77 (1H, d,  $J_1$  = 17.2 Hz,  $J_2$  = 10.4 Hz,  $J_3$  = 6.8 Hz), 4.96 (1H, dd,  $J_1$  = 17.2 Hz,  $J_2$  = 1.6 Hz), 4.90 (1H, dd,  $J_1$  = 10.4 Hz,  $J_2$  = 1.6 Hz), 3.97 – 3.81 (2H, m), 2.00 (2H, dt,  $J_1$  = 6.8 Hz,  $J_2$  = 7.2 Hz), 1.66 – 1.59 (4H, m), 1.31 – 1.20 (10H, m).  **$\delta$ C** (100 MHz, CDCl<sub>3</sub>): 139.2, 134.9, 133.9, 130.4, 119.1, 114.1, 33.8, 30.6, 30.4, 29.4, 29.3, 29.2, 29.0, 28.8, 22.8. **IR** ( $\nu_{\max}$ , cm<sup>-1</sup>): 1627, 1588, 1438, 1267, 1114. **MS** ( $m/z$ ): Found 415.2554 (C<sub>29</sub>H<sub>26</sub>P<sup>+</sup> requires 415.2549).

### (13E)-12-Methylnonadeca-1,11,13-triene (E/Z = 1.0 : 2.2) (23)

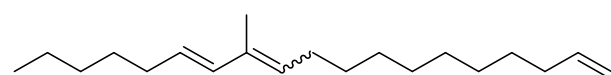

**21** (2.253 g, 5.00 mmol) was dissolved in anhydrous THF (20 mL) under a nitrogen atmosphere and cooled to -78°C, <sup>n</sup>BuLi (2.0 mL, 2.5 M in hexanes, 5.00 mmol) added dropwise to produce an orange-red solution of ylide then allowed to warm to room temperature, and stirred for 1 h. After this period, 3-nonen-2-one (0.92 mL, 5.50 mmol) was added dropwise to the ylide, and the resulting mixture stirred 16 h. MeOH (5 mL) was added to quench the reaction, and solvents were removed *in vacuo*. The crude product was purified by column chromatography (100% hexanes, R<sub>f</sub> = 0.57) affording the pure compound as a colourless oil (0.448 g, 1.62 mmol, 32 %, E/Z = 1.0 : 2.2).  **$\delta$ H** (400 MHz, CDCl<sub>3</sub>): 6.04 (1H, d,  $J$  = 15.6 Hz), 5.80 (1H, m), 5.54 (1H, dt,  $J_1$  = 15.6 Hz,  $J_2$  = 6.8 Hz), 5.37 (1H, t,  $J$  = 7.6 Hz), 5.01 – 4.95 (1H, m), 4.94 – 4.90 (1H, m), 2.14 – 2.00 (6H, m), 1.40 – 1.27 (18H, m), 0.90 – 0.84 (3H, m).  **$\delta$ C** (100 MHz, CDCl<sub>3</sub>): 139.3, 134.8, 133.5, 130.8, 127.7, 114.2, 33.9, 33.0, 31.6, 29.8, 29.6, 29.5, 29.5, 29.5, 29.2, 29.0, 28.2, 22.7, 14.2, 12.5. **IR** ( $\nu_{\max}$ , cm<sup>-1</sup>): 1640, 1465, 1378. **MS** ( $m/z$ ): Found 275.2738 (C<sub>20</sub>H<sub>35</sub><sup>+</sup> requires 275.2733).

### 3-(Dec-9-en-1-yl)-4-methyl-6-pentyl-3,6-dihydro-1,2-dioxine (14m)

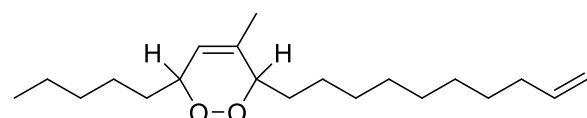

A stream of oxygen was passed through a solution of **23** (0.200 g, 0.72 mmol) in CH<sub>2</sub>Cl<sub>2</sub>/MeOH (19:1, 30 mL) containing 10<sup>-4</sup> M methylene blue whilst irradiated for 15 minutes at room temperature with a 400W halogen light source. After this period, solvents were removed *in vacuo*, and the crude product purified by column chromatography (9:1 petroleum ether/ethyl acetate, R<sub>f</sub> = 0.81) affording a colourless oil (0.108 g, 0.35 mmol, 49%).  **$\delta$ H** (400 MHz, CDCl<sub>3</sub>): 5.83 (1H, m), 5.53 (1H, d,  $J$  = 10.4 Hz), 5.03 (1H, dd,  $J_1$  = 17.2 Hz,  $J_2$  = 3.6 Hz), 4.94 (1H, dd,  $J_1$  = 10.0 Hz,  $J_2$  = 2.4 Hz), 4.54 (1H, m), 4.13 (1H, m), 2.07 – 1.98 (2H, m), 1.75 (3H, s), 1.67 – 1.32 (22H, m), 0.91 (3H, t,  $J$  = 6.8 Hz).  **$\delta$ C** (100 MHz, CDCl<sub>3</sub>): 134.7, 133.2, 125.8, 122.6, 81.8, 78.3, 33.0, 32.6, 32.0, 31.9, 31.4, 31.1, 29.8, 29.7, 29.4, 29.2, 24.9, 22.6, 19.0, 14.1. **IR** ( $\nu_{\max}$ , cm<sup>-1</sup>): 1645, 1560, 1466, 1096, 1017. **MS** ( $m/z$ ): Found 331.2615 (C<sub>20</sub>H<sub>36</sub>O<sub>2</sub>Na<sup>+</sup> requires 331.2608).

## 2-(Dec-9-en-1-yl)-3-methyl-5-pentylfuran (15m)<sup>11</sup>

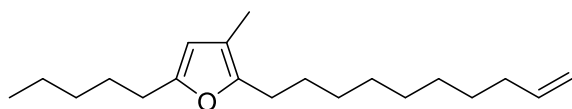

A solution of  $\text{CBr}_4$  (0.047 g, 0.14 mmol) in  $\text{CH}_2\text{Cl}_2$  (1.0 mL) was cooled to  $0^\circ\text{C}$  and  $\text{PPh}_3$  (0.037 g, 0.14 mmol) added. The mixture was stirred for 10 minutes, then a solution of 1,2-dioxine **14m**

(0.040 g, 0.13 mmol) in  $\text{CH}_2\text{Cl}_2$  (1.0 mL) added and the solution brought to r.t. The resulting mixture was allowed to stir for 40 h, then solvents removed *in vacuo*. The crude product was purified by column chromatography (99:1 hexanes/ethyl acetate,  $R_f = 0.42$ ) affording the furan as a colourless oil (0.025 g, 0.09 mmol, 66%).  **$\delta\text{H}$**  (400 MHz,  $\text{CDCl}_3$ ): 5.85 – 5.75 (1H, m), 5.72 (1H, s), 5.00 – 4.90 (2H, m), 2.51 (2H, t,  $J = 7.6$  Hz), 2.48 (2H, t,  $J = 7.6$  Hz), 2.06 – 2.01 (2H, m), 1.89 (3H, s), 1.61 – 1.52 (4H, m), 1.37 – 1.25 (14H, m), 0.91 – 0.88 (3H, m).  **$\delta\text{C}$**  (100 MHz,  $\text{CDCl}_3$ ): 153.6, 149.5, 139.3, 114.2, 113.9, 107.7, 33.9, 33.9, 31.5, 29.8, 29.5, 29.4, 29.3, 29.2, 29.0, 27.1, 26.0, 22.5, 14.1, 10.0. **IR** ( $\nu_{\text{max}}$ ,  $\text{cm}^{-1}$ ): 1640, 1576, 1463, 1378. **MS** ( $m/z$ ): Found 291.2680 ( $\text{C}_{20}\text{H}_{35}\text{O}^+$  requires 291.2682).

## Methyl 11-(3-methyl-5-pentylfuran-2-yl)undecanoate (1e)

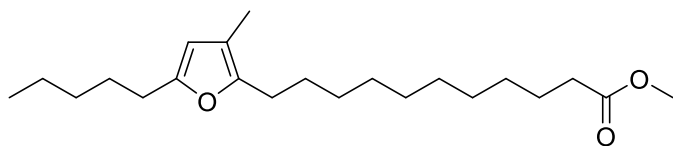

A solution of **15m** (0.020 g, 0.07 mmol) and Grubbs 2nd generation catalyst (0.006 g, 0.01 mmol, 10 mol%) in toluene (5 mL) was degassed with ethylene for 30 min, then maintained under an atmosphere of nitrogen.

Methyl acrylate (0.062 mL, 0.75 mmol) was added, and the resulting mixture was heated to  $100^\circ\text{C}$  for 4 hours after which point TLC monitoring showed complete consumption of the starting furan. After this period the mixture was cooled,  $\text{PtO}_2$  (0.002 g, 0.01 mmol, 10 mol%) was added and the mixture degassed with hydrogen. The mixture was stirred for 15 h at room temperature under a hydrogen atmosphere, then solvents were removed *in vacuo* and the crude product adsorbed onto silica. Purification by column chromatography (19:1 hexanes/ethyl acetate,  $R_f = 0.36$ ) afforded the methyl ester of **F<sub>5</sub>** as a colourless oil (0.024 mg, 0.07 mmol, 98%).  **$\delta\text{H}$**  (400 MHz,  $\text{CDCl}_3$ ): 5.76 (1H, s), 3.66 (3H, s), 2.54 (2H, t,  $J = 7.6$  Hz), 2.51 (2H, t,  $J = 7.6$  Hz), 2.30 (2H, t,  $J = 8.4$  Hz), 1.87 (3H, s), 1.65 – 1.52 (7H, m), 1.35 – 1.24 (15H, m), 0.89 (3H, t,  $J = 7.2$  Hz).  **$\delta\text{C}$**  (100 MHz,  $\text{CDCl}_3$ ): 174.4, 153.5, 149.4, 113.8, 107.6, 51.4, 34.1, 31.4, 29.5, 29.4, 29.4, 29.2, 29.2, 29.2, 28.8, 28.0, 27.9, 25.9, 25.0, 22.4, 14.0, 9.9. **IR** ( $\nu_{\text{max}}$ ,  $\text{cm}^{-1}$ ): 1743, 1638, 1576, 1462, 1436. **MS**,  $m/z$  Found (373.2712,  $\text{C}_{22}\text{H}_{38}\text{O}_3\text{Na}^+$  requires 373.2713).

<sup>11</sup> D. W. Knight and A. W. T. Smith, *Tetrahedron* 2015, **71**, 7436.

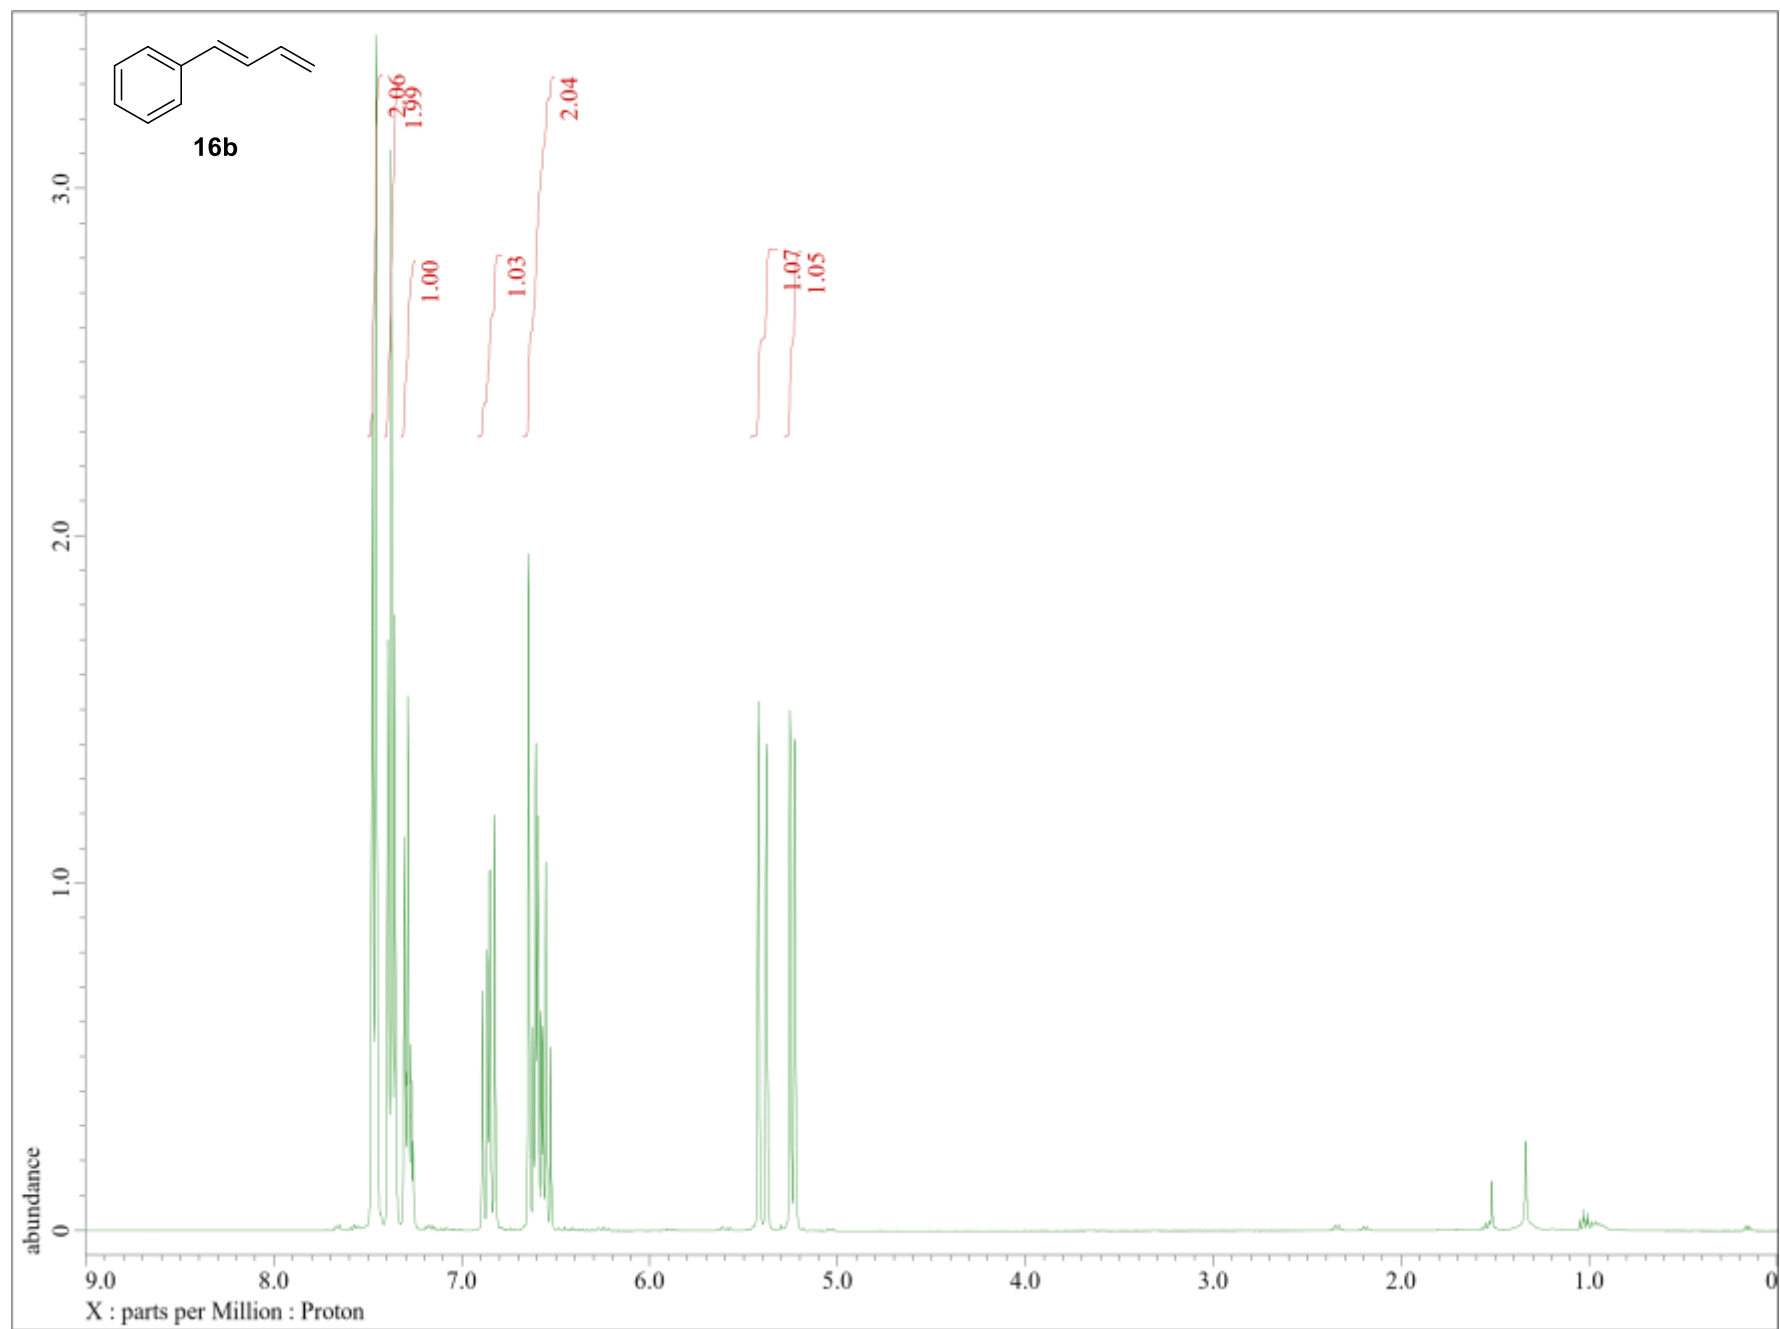

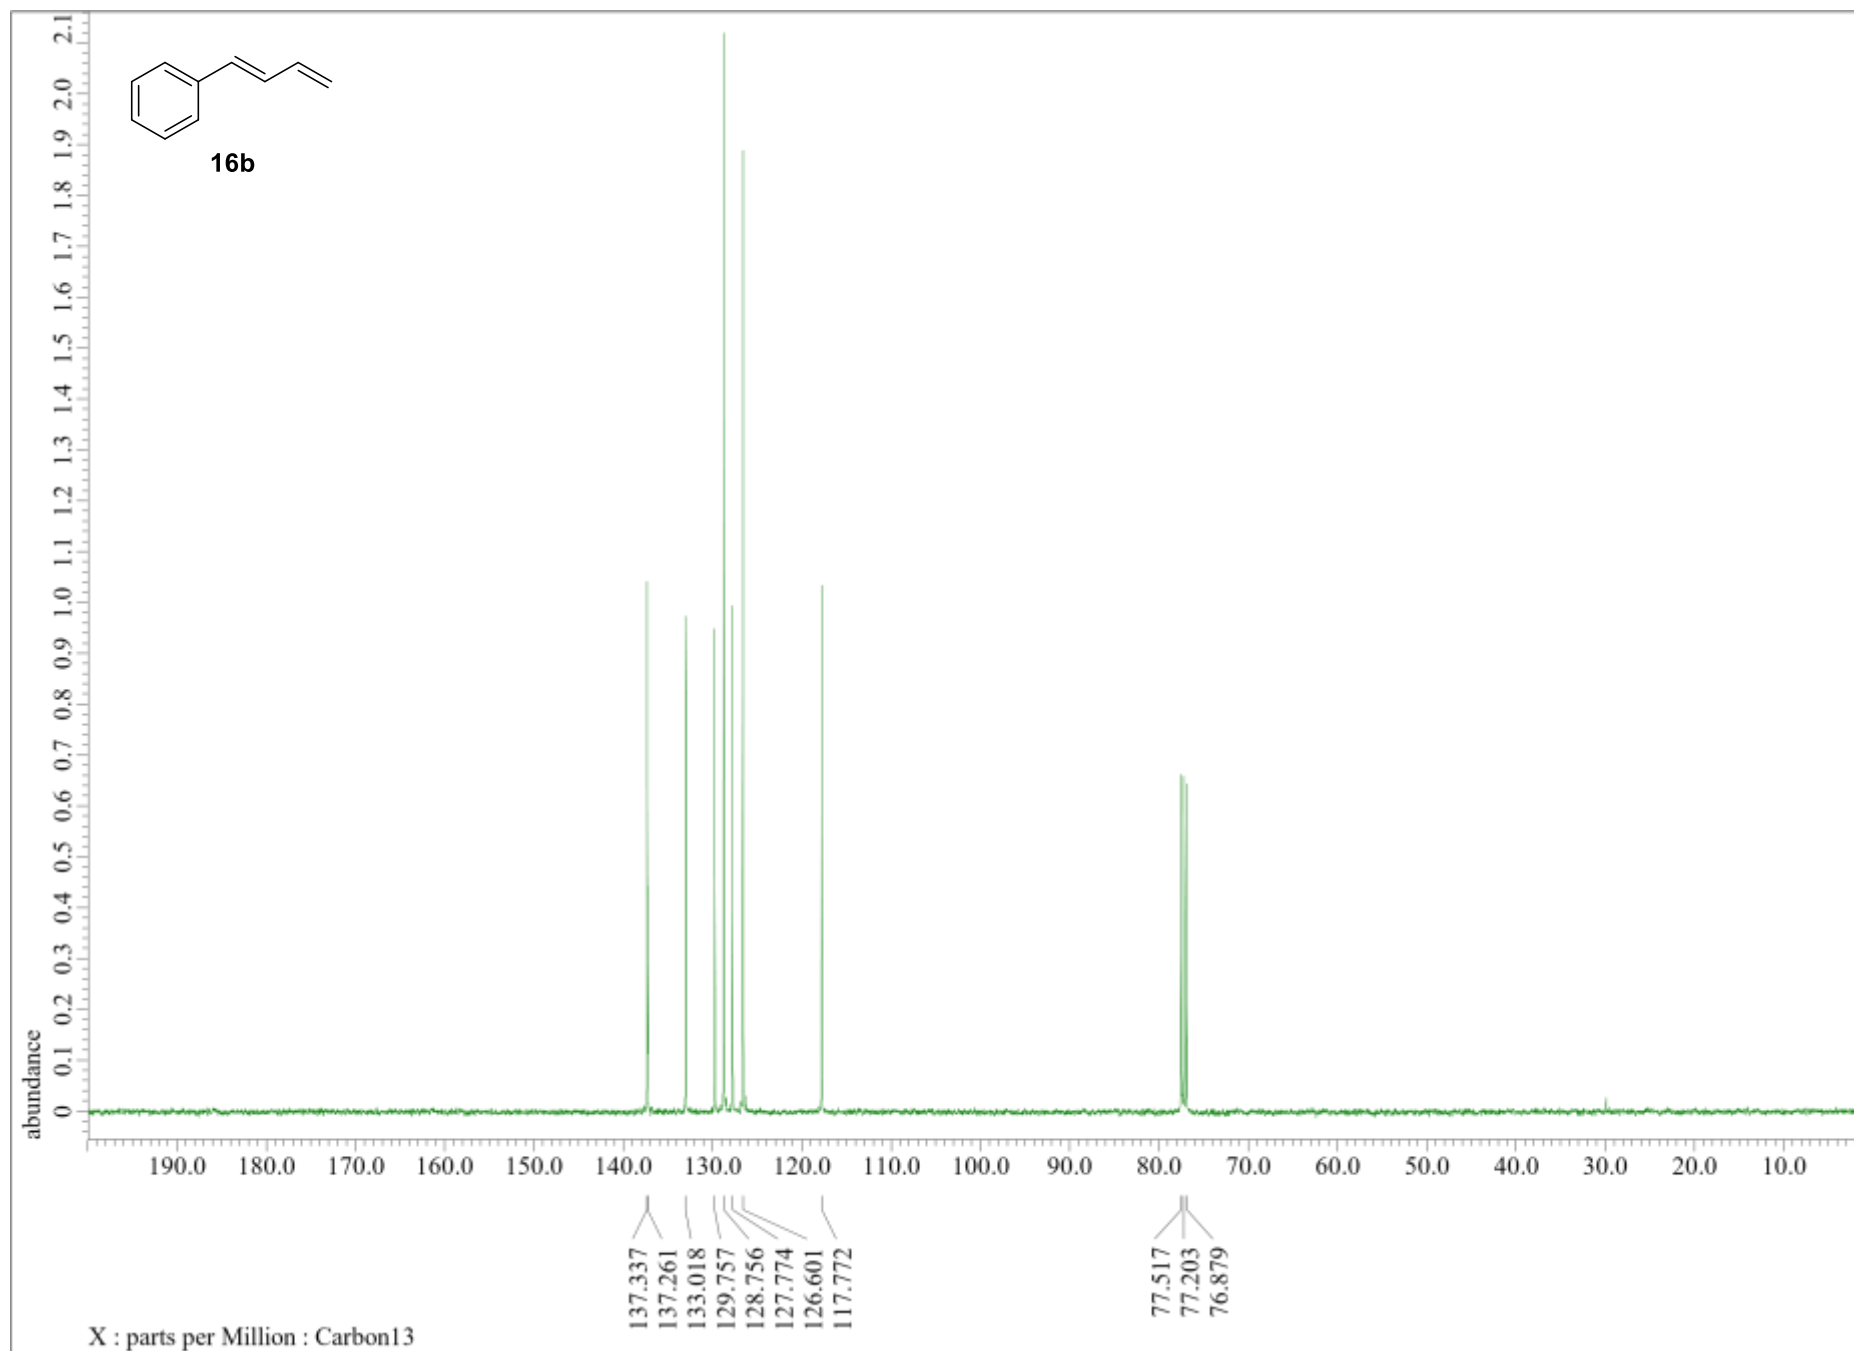



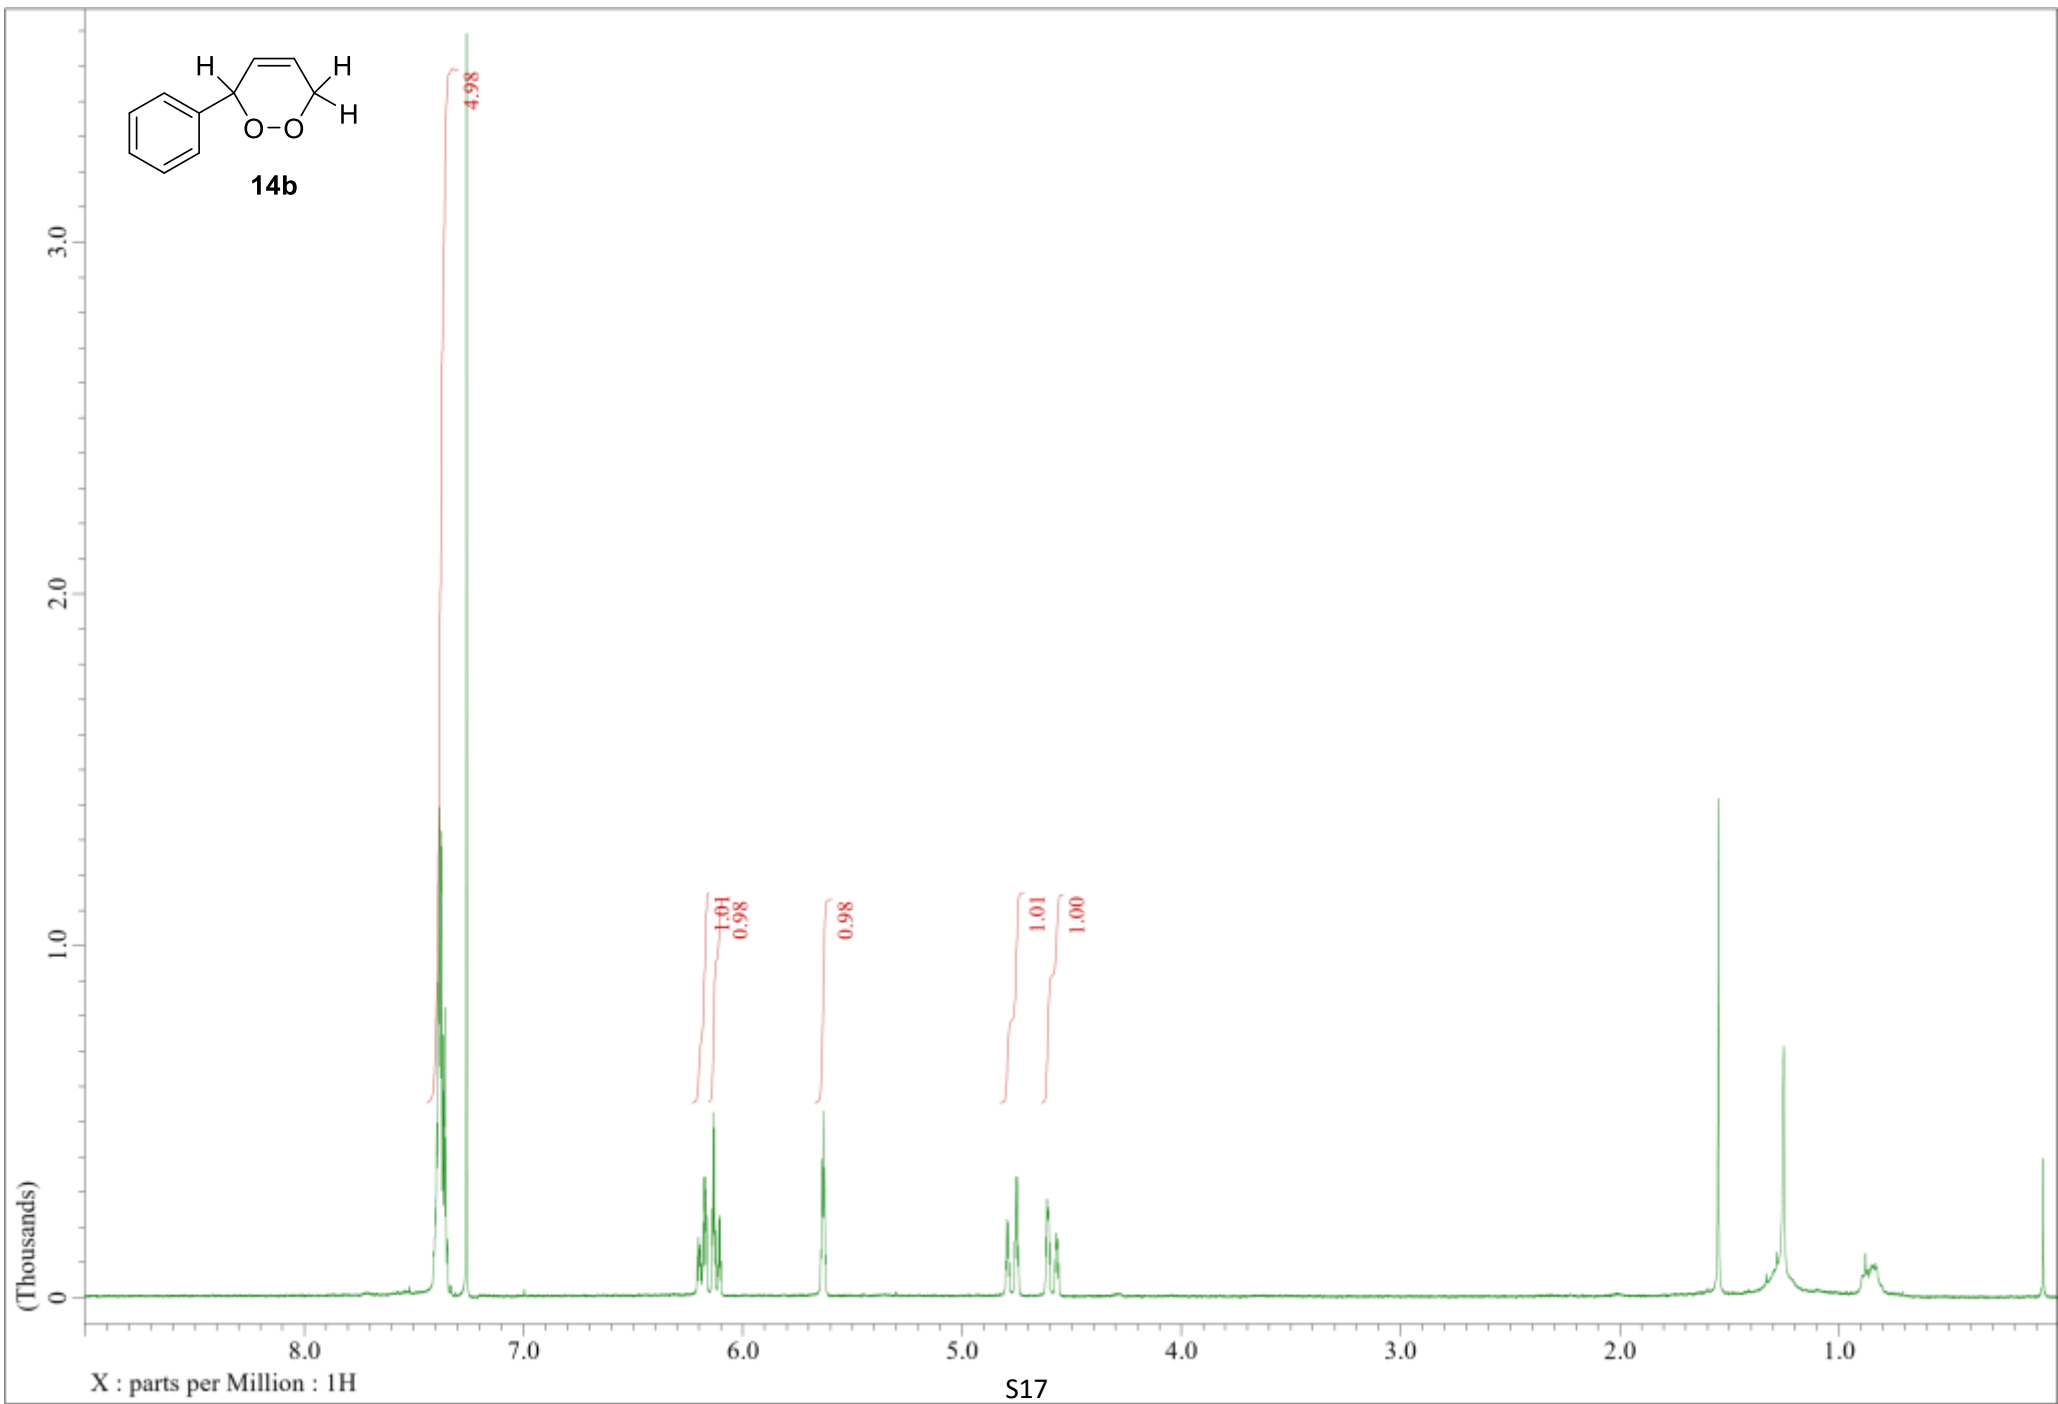

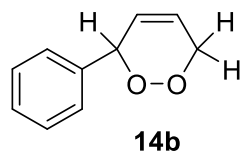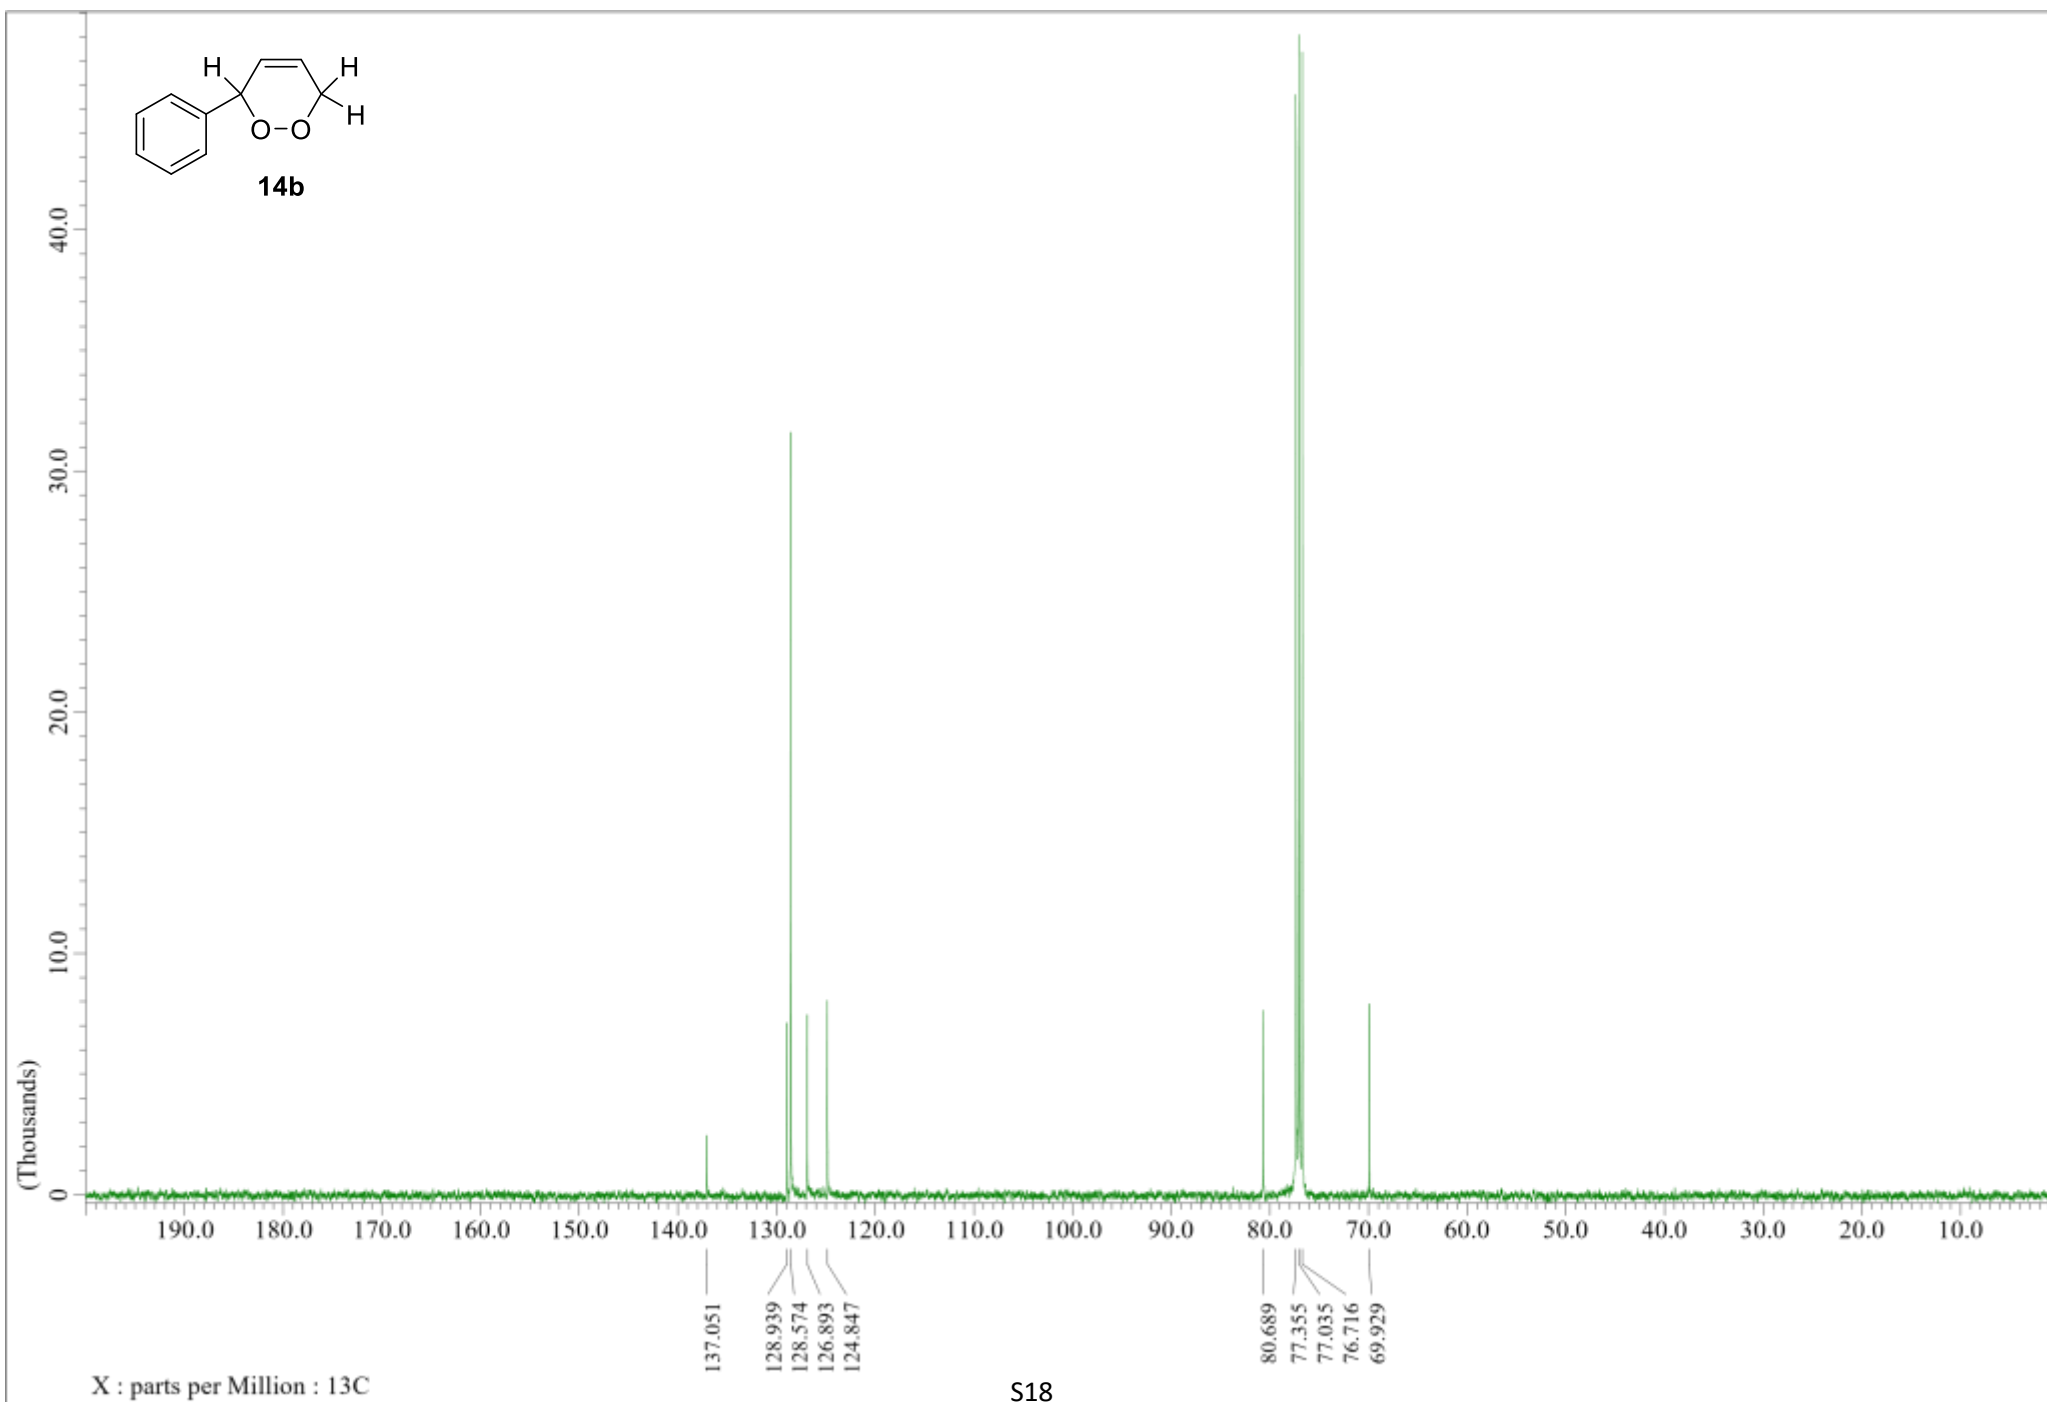

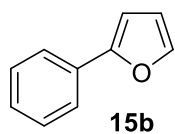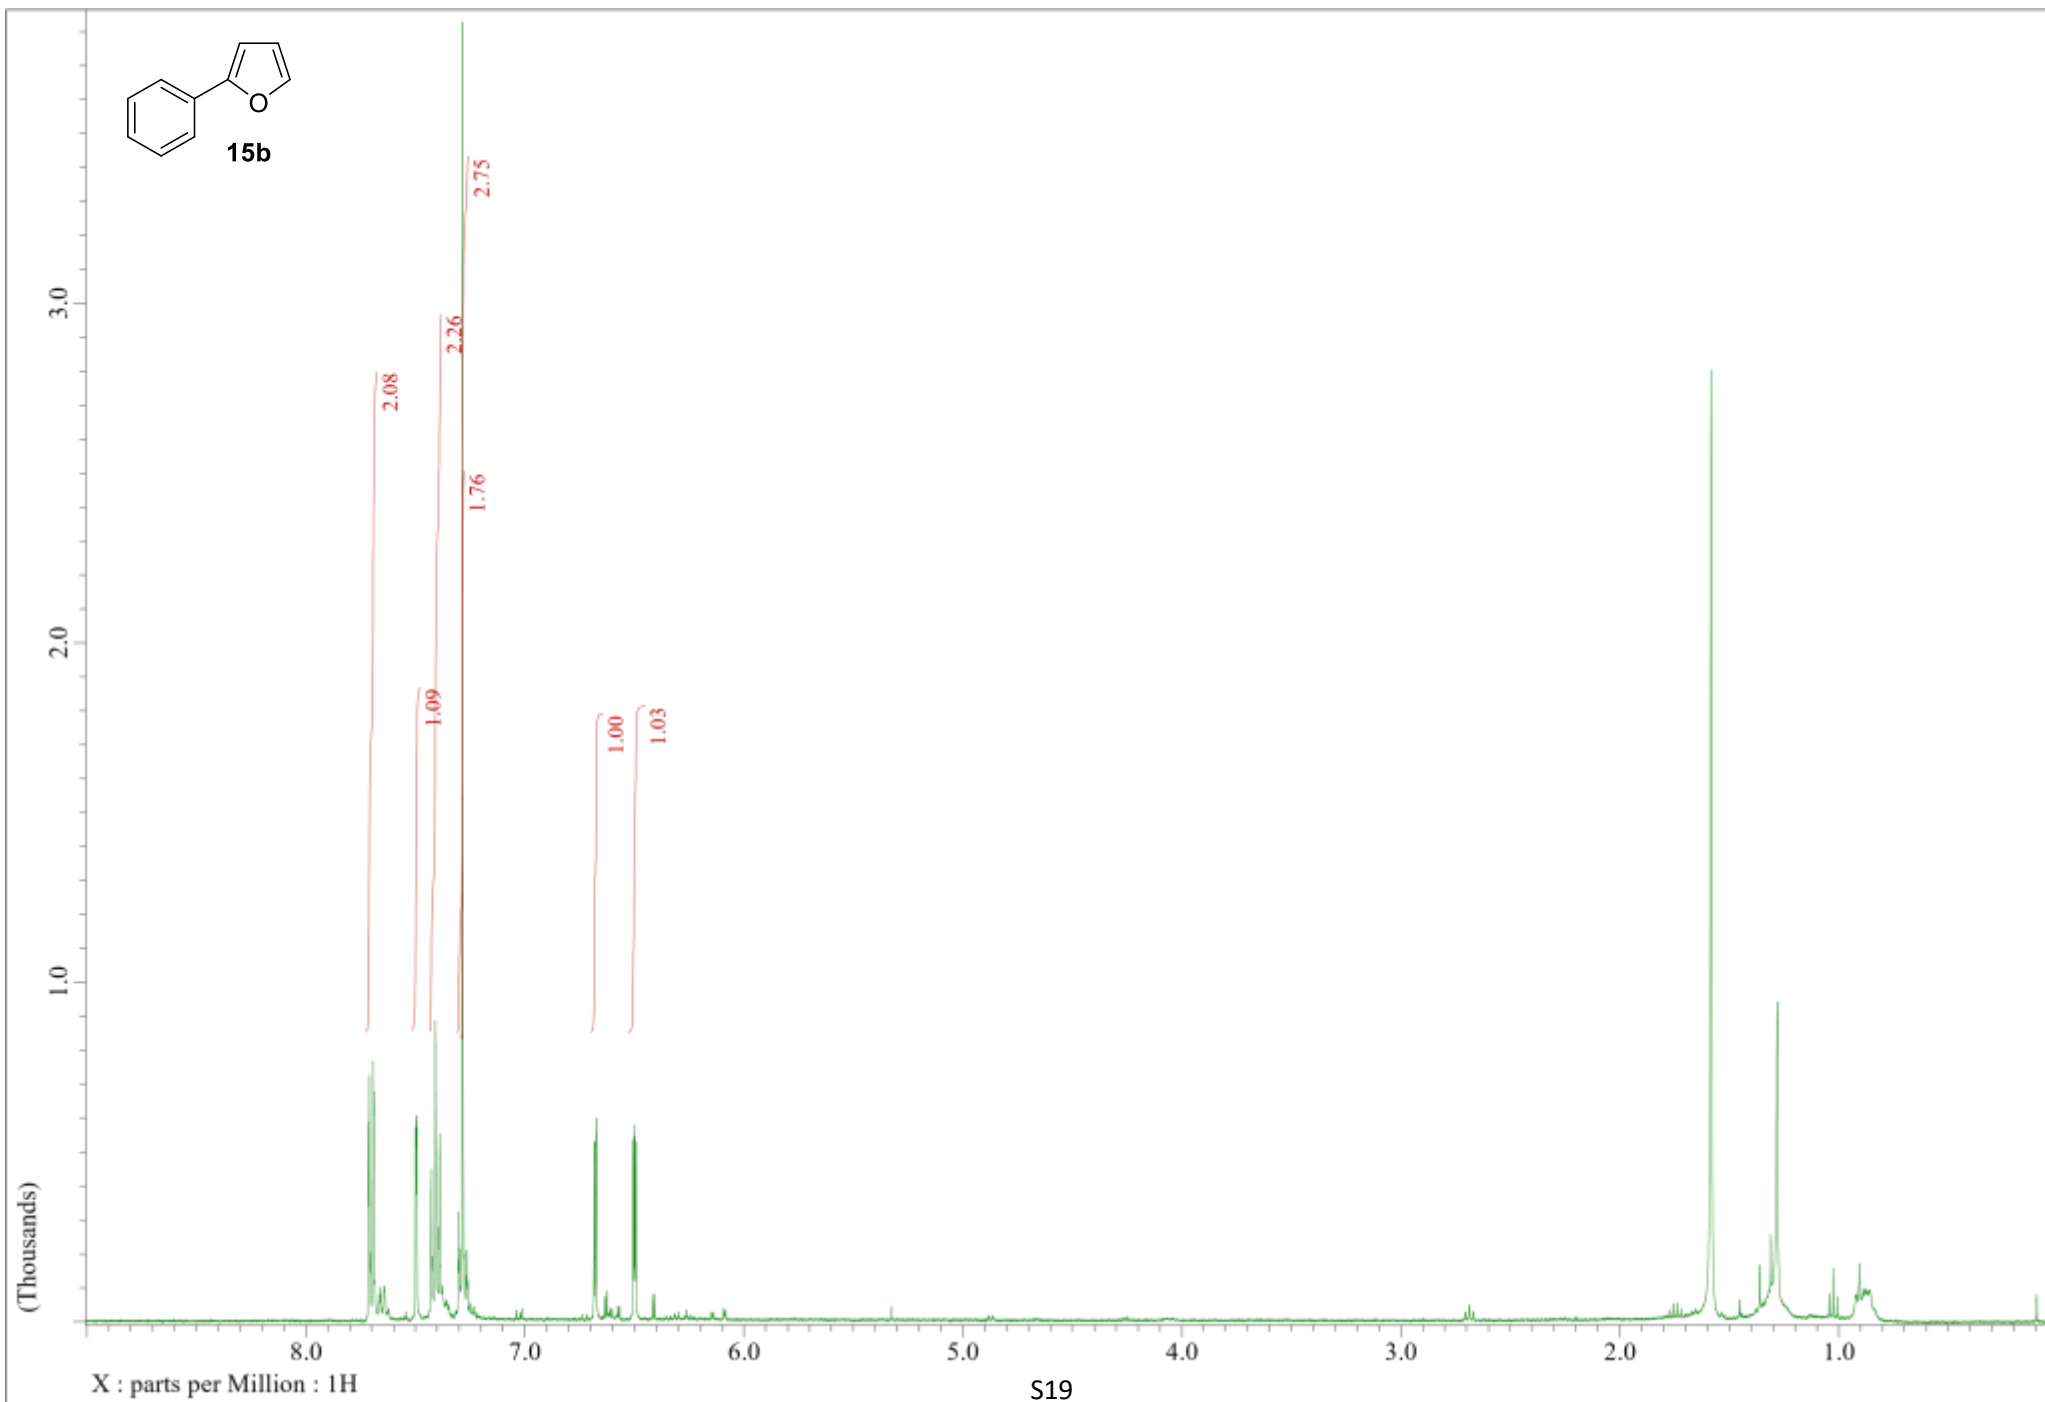

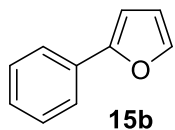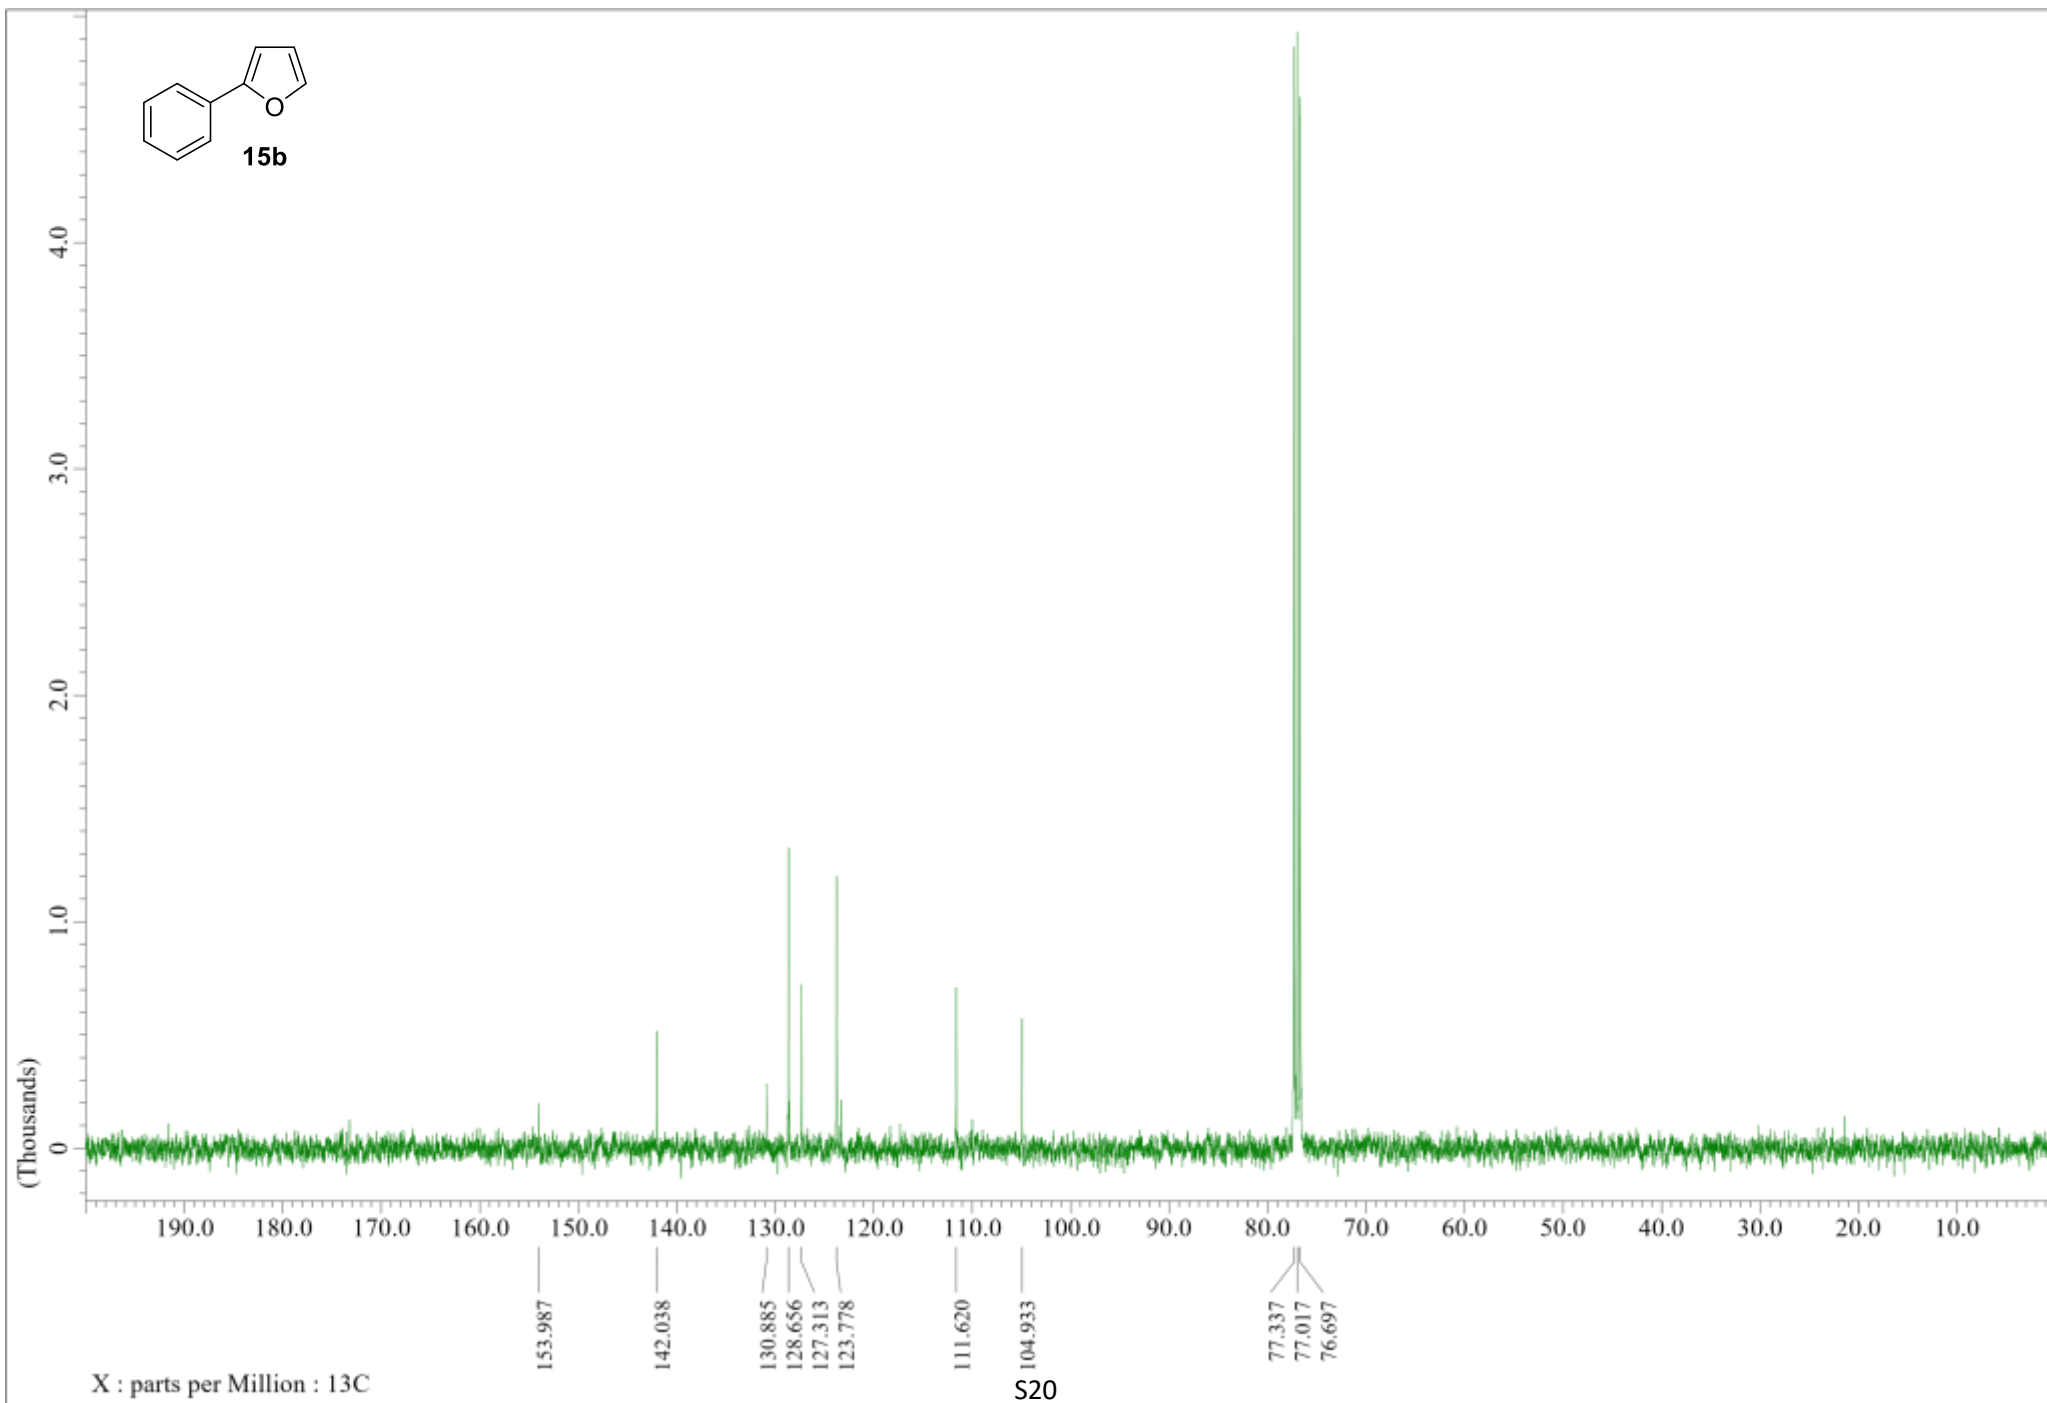

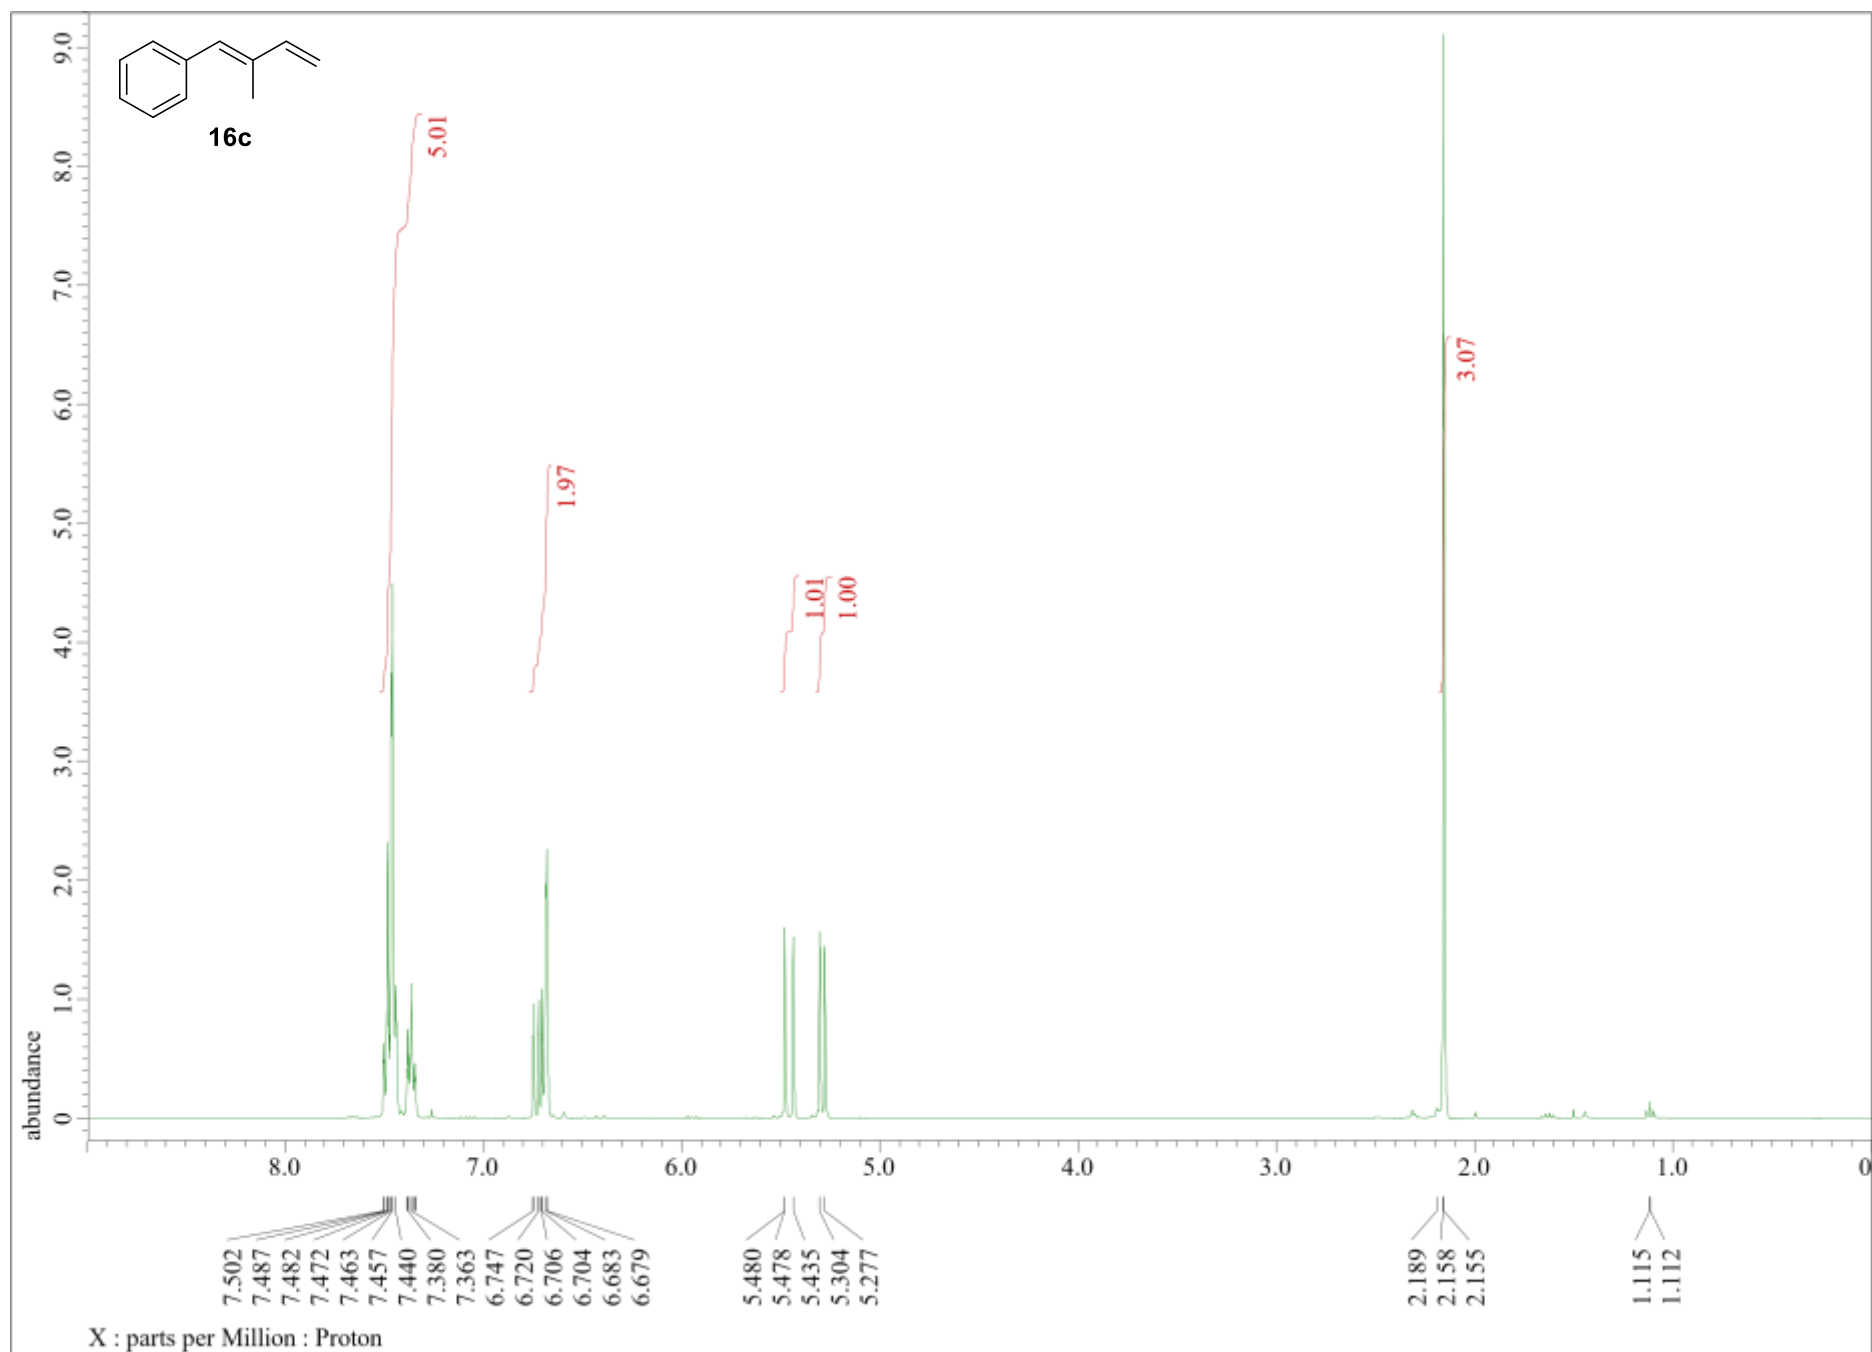

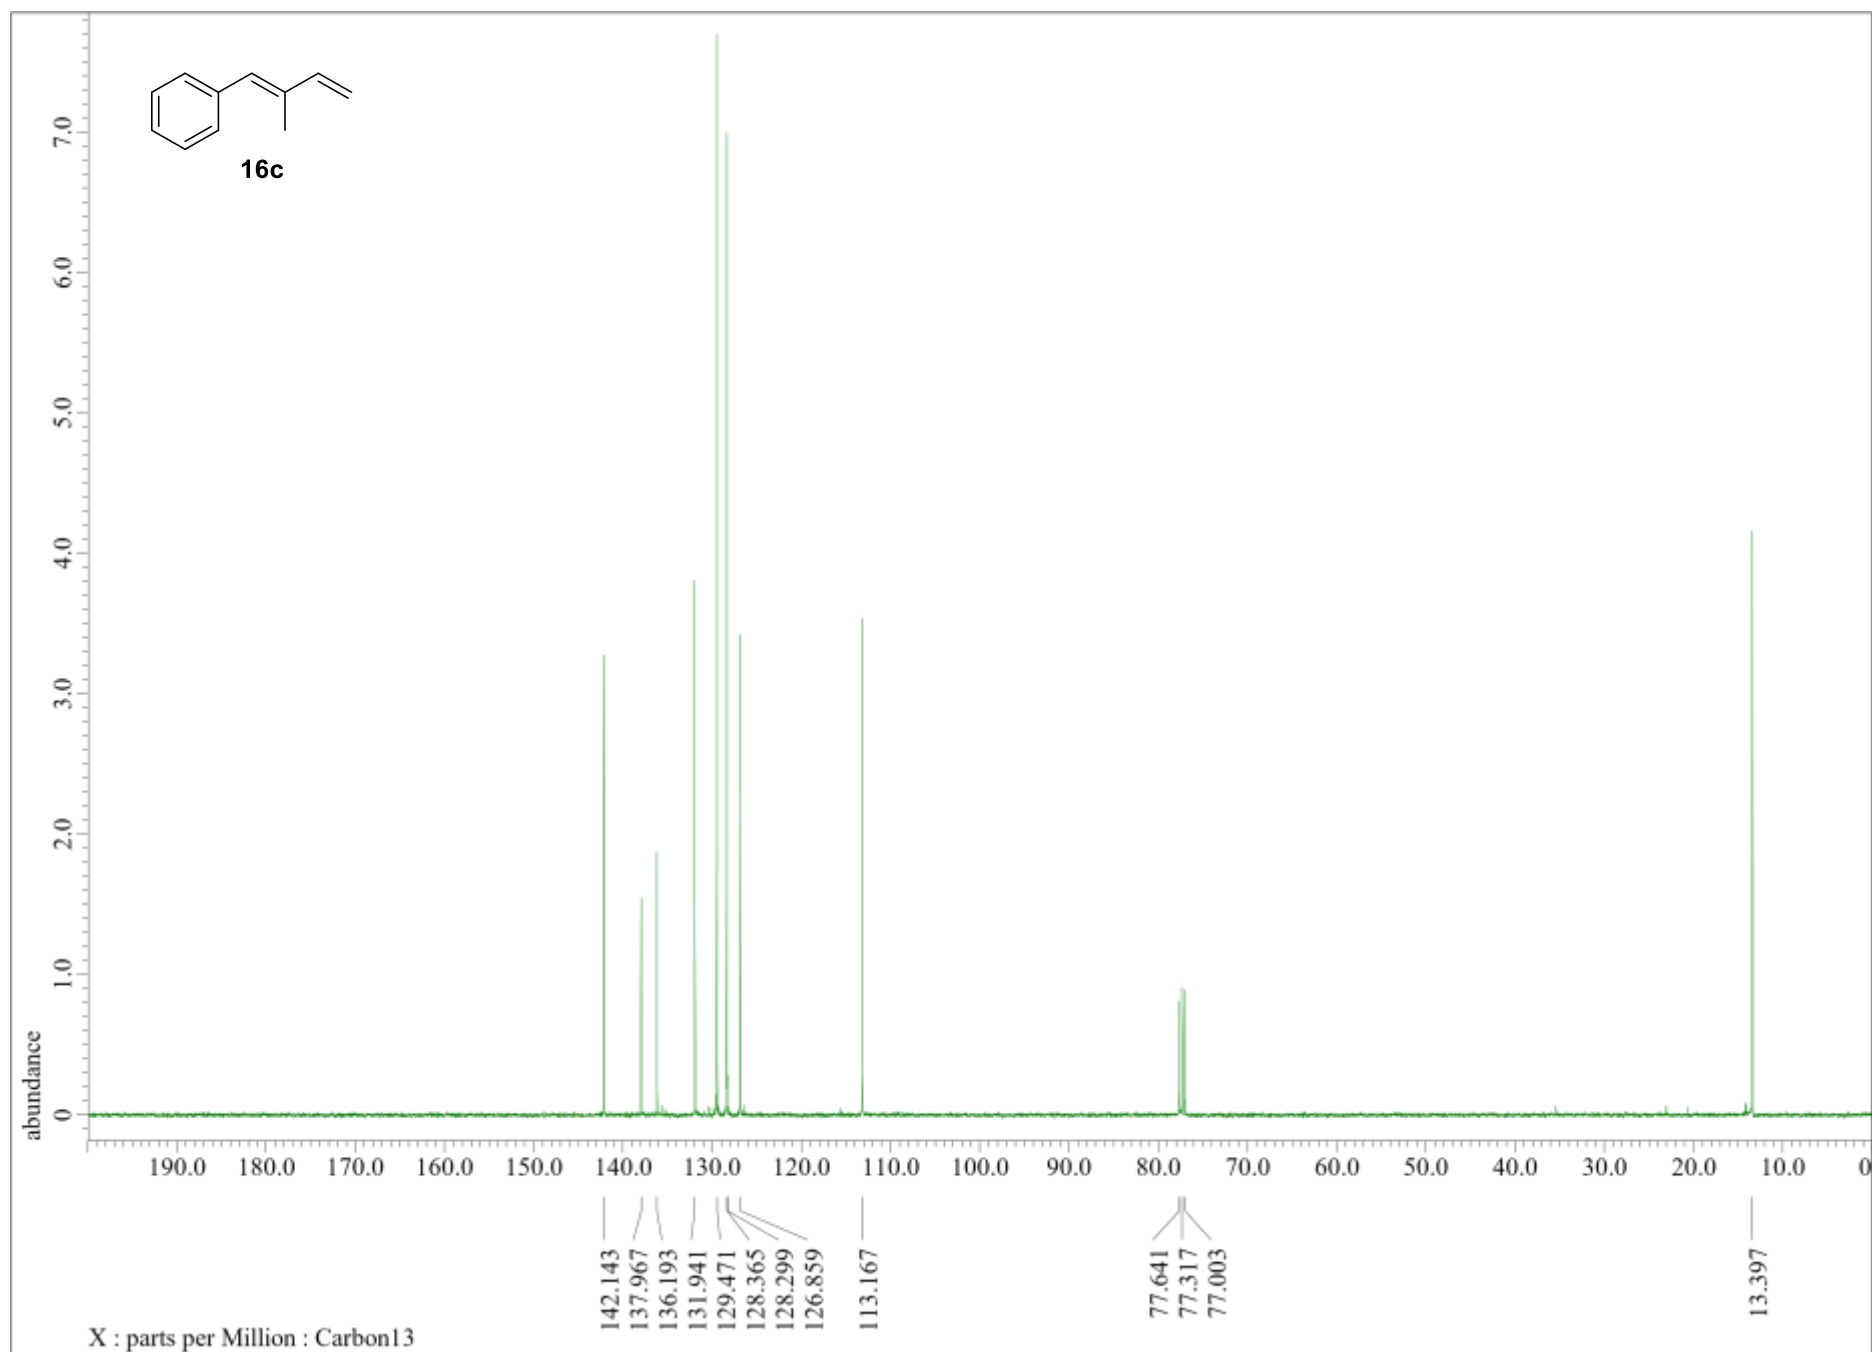

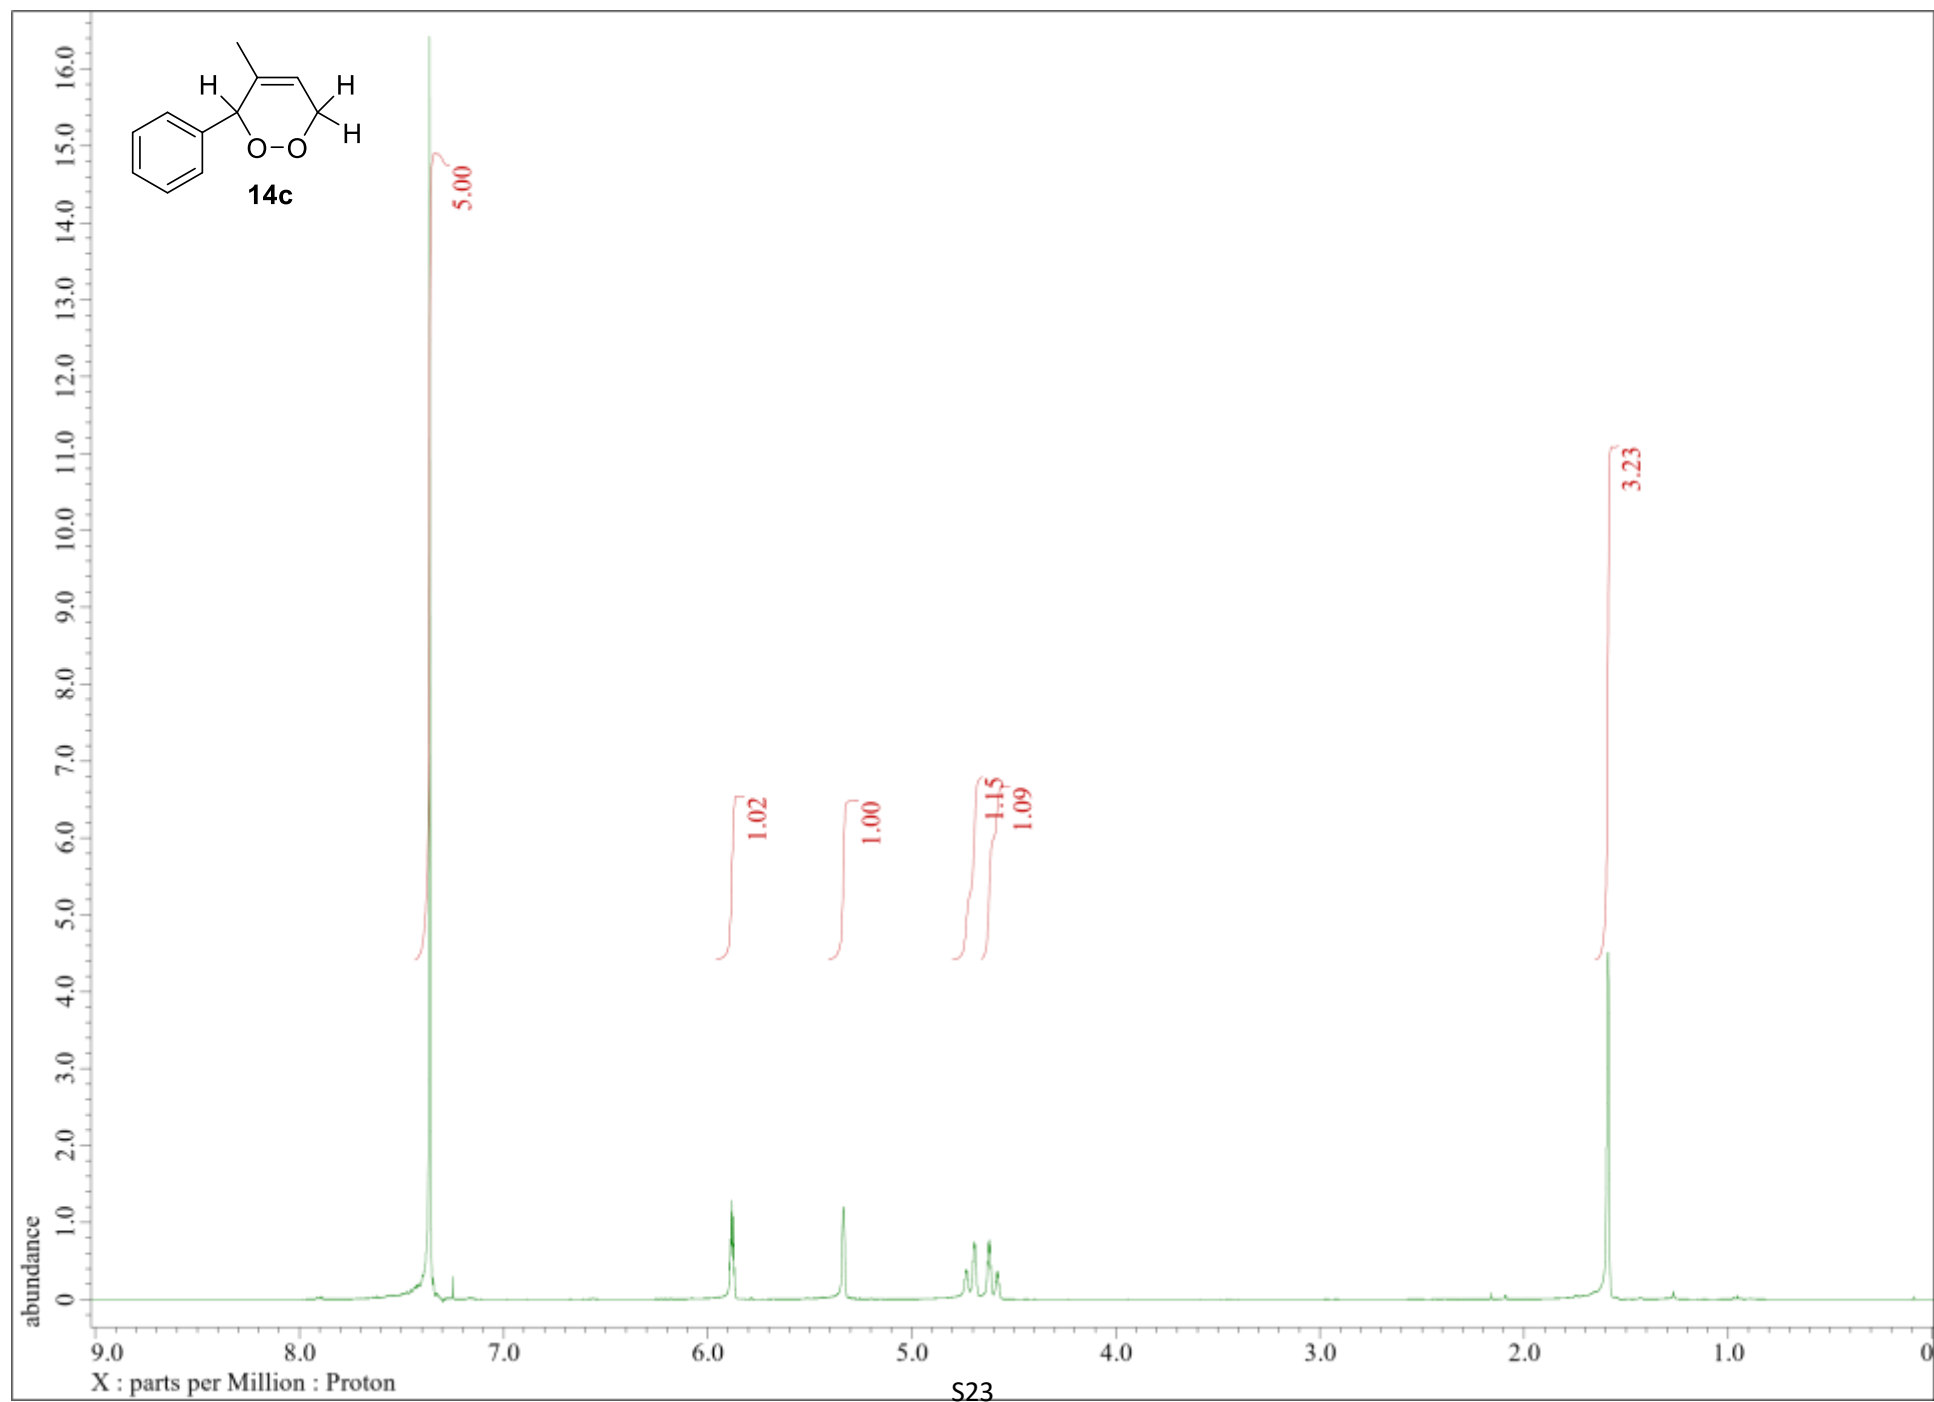

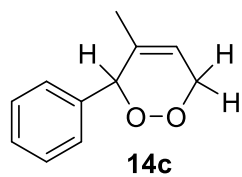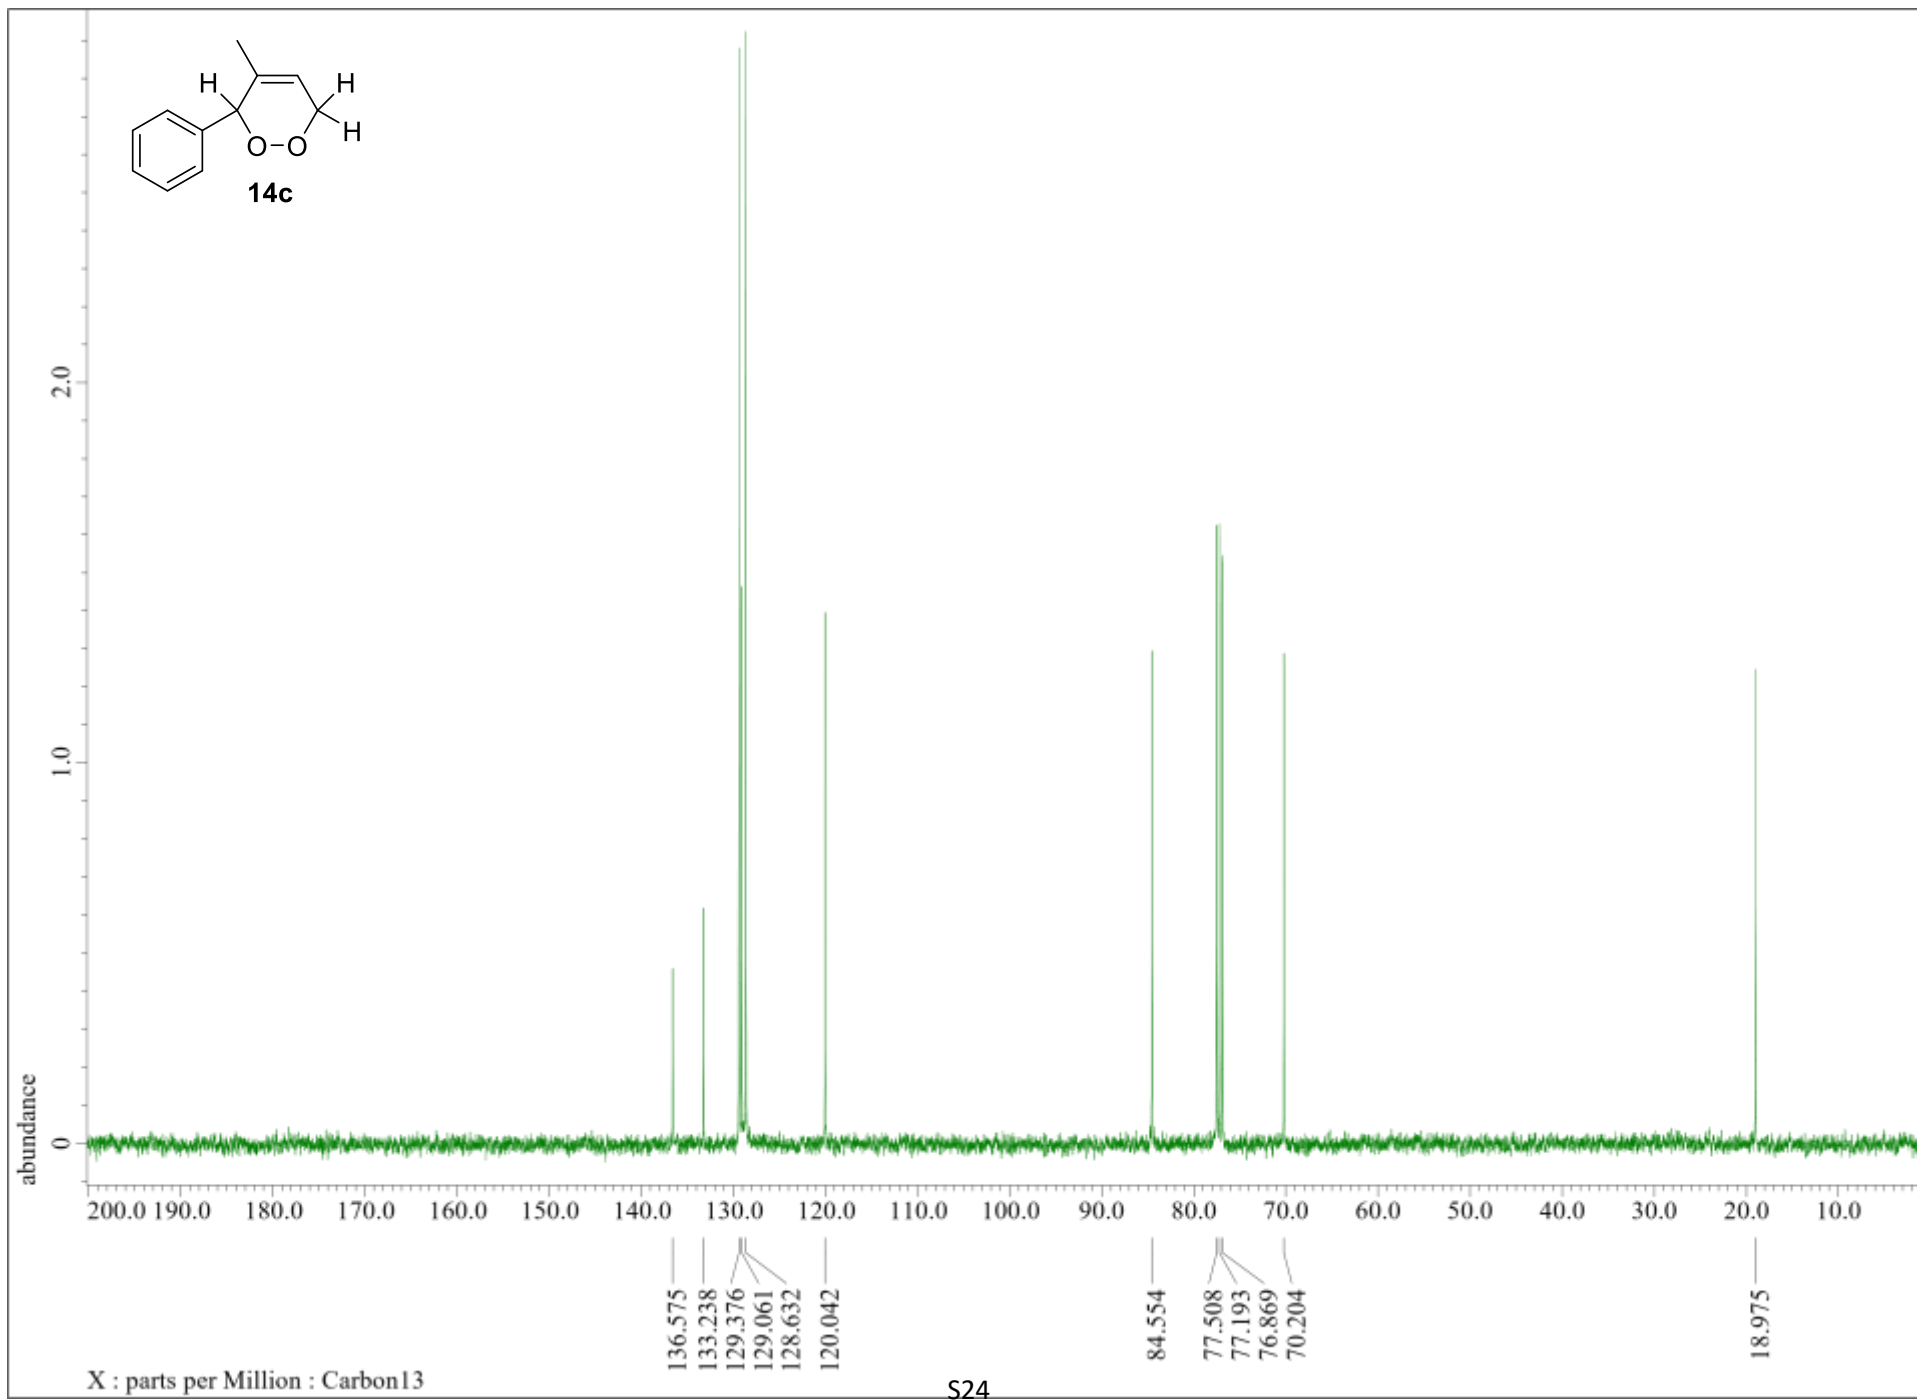



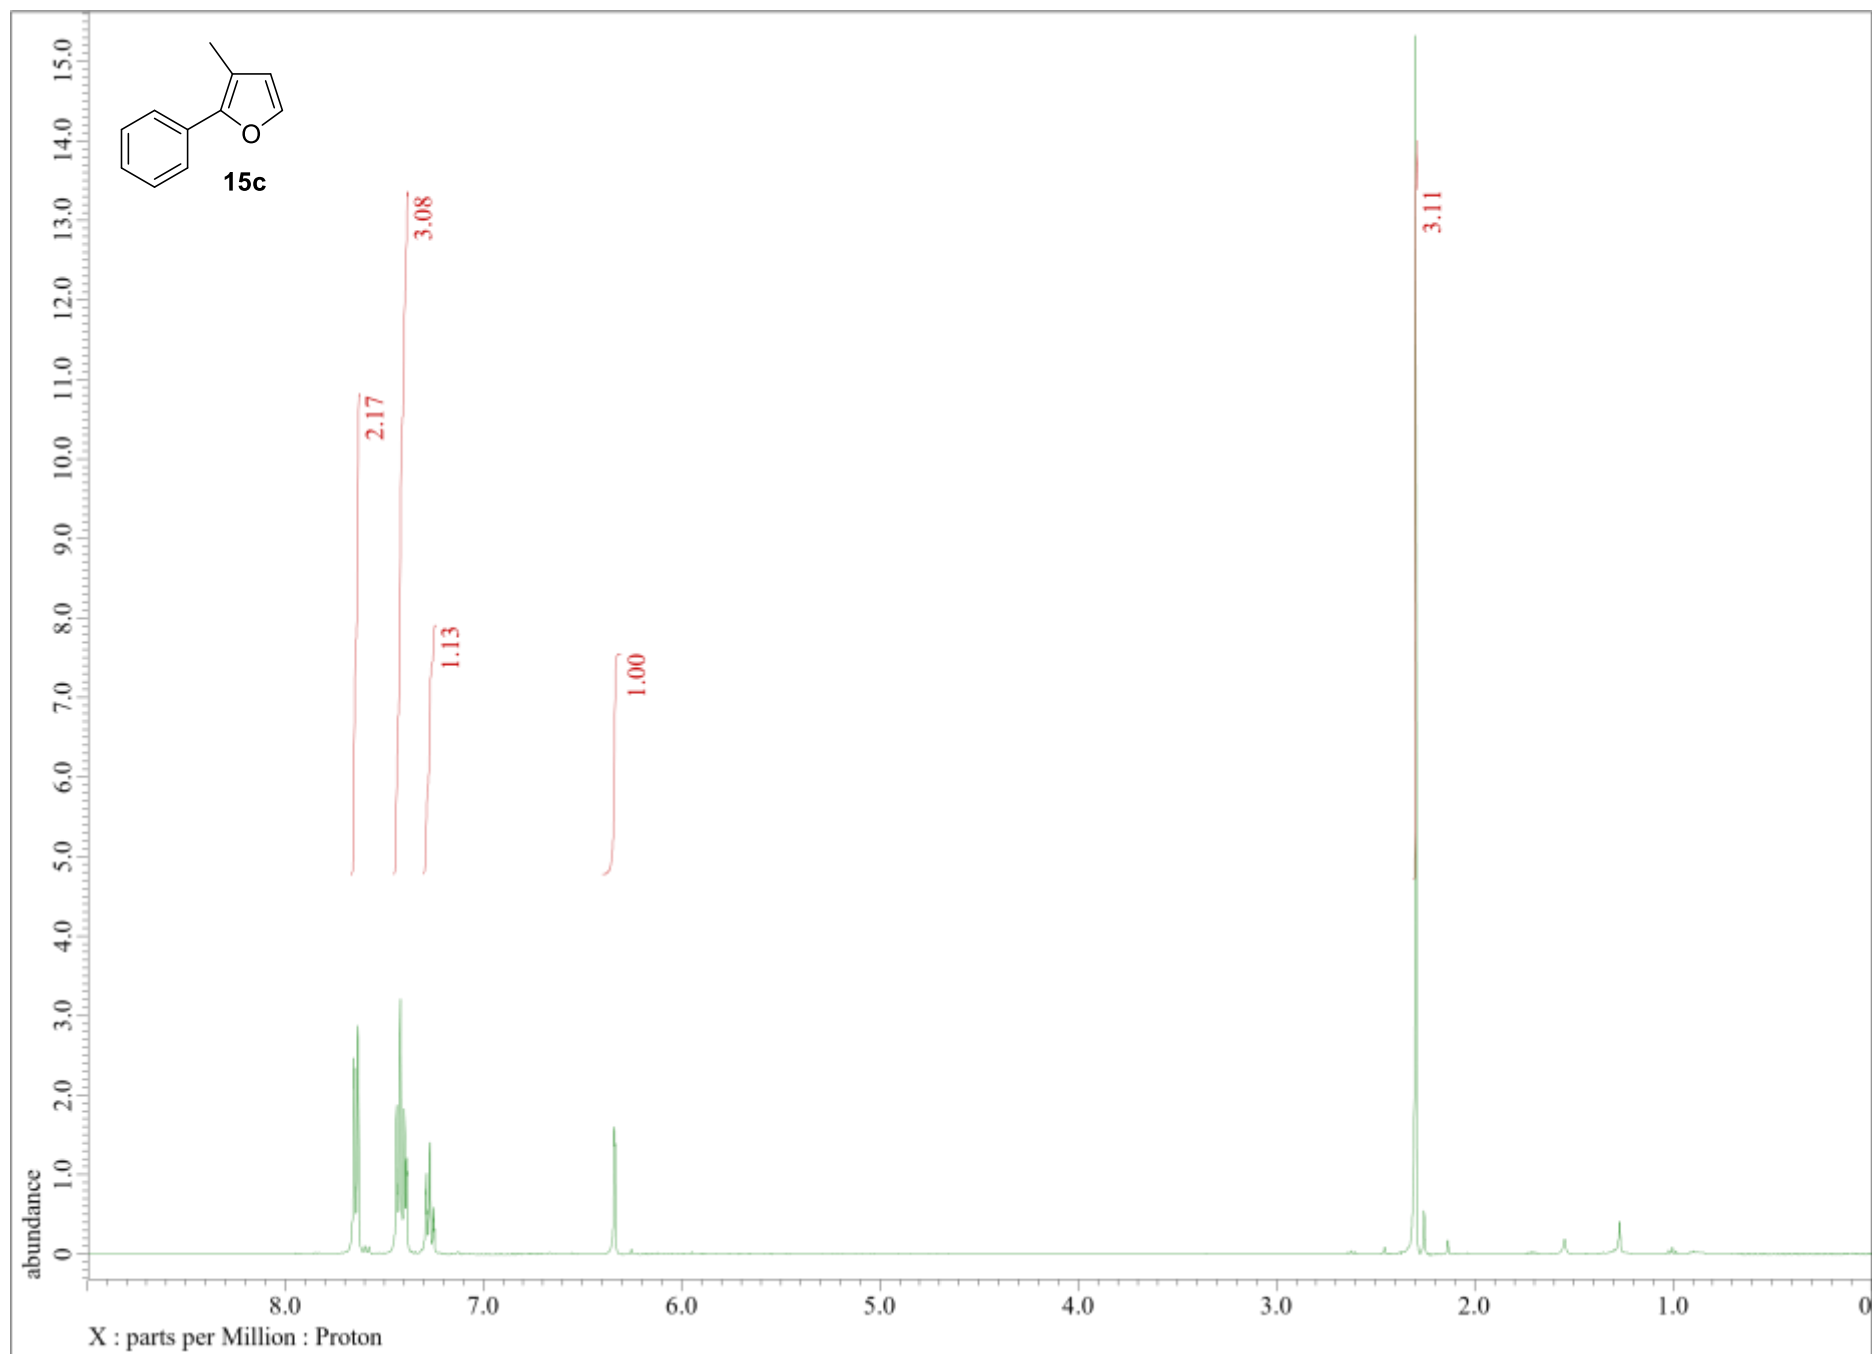

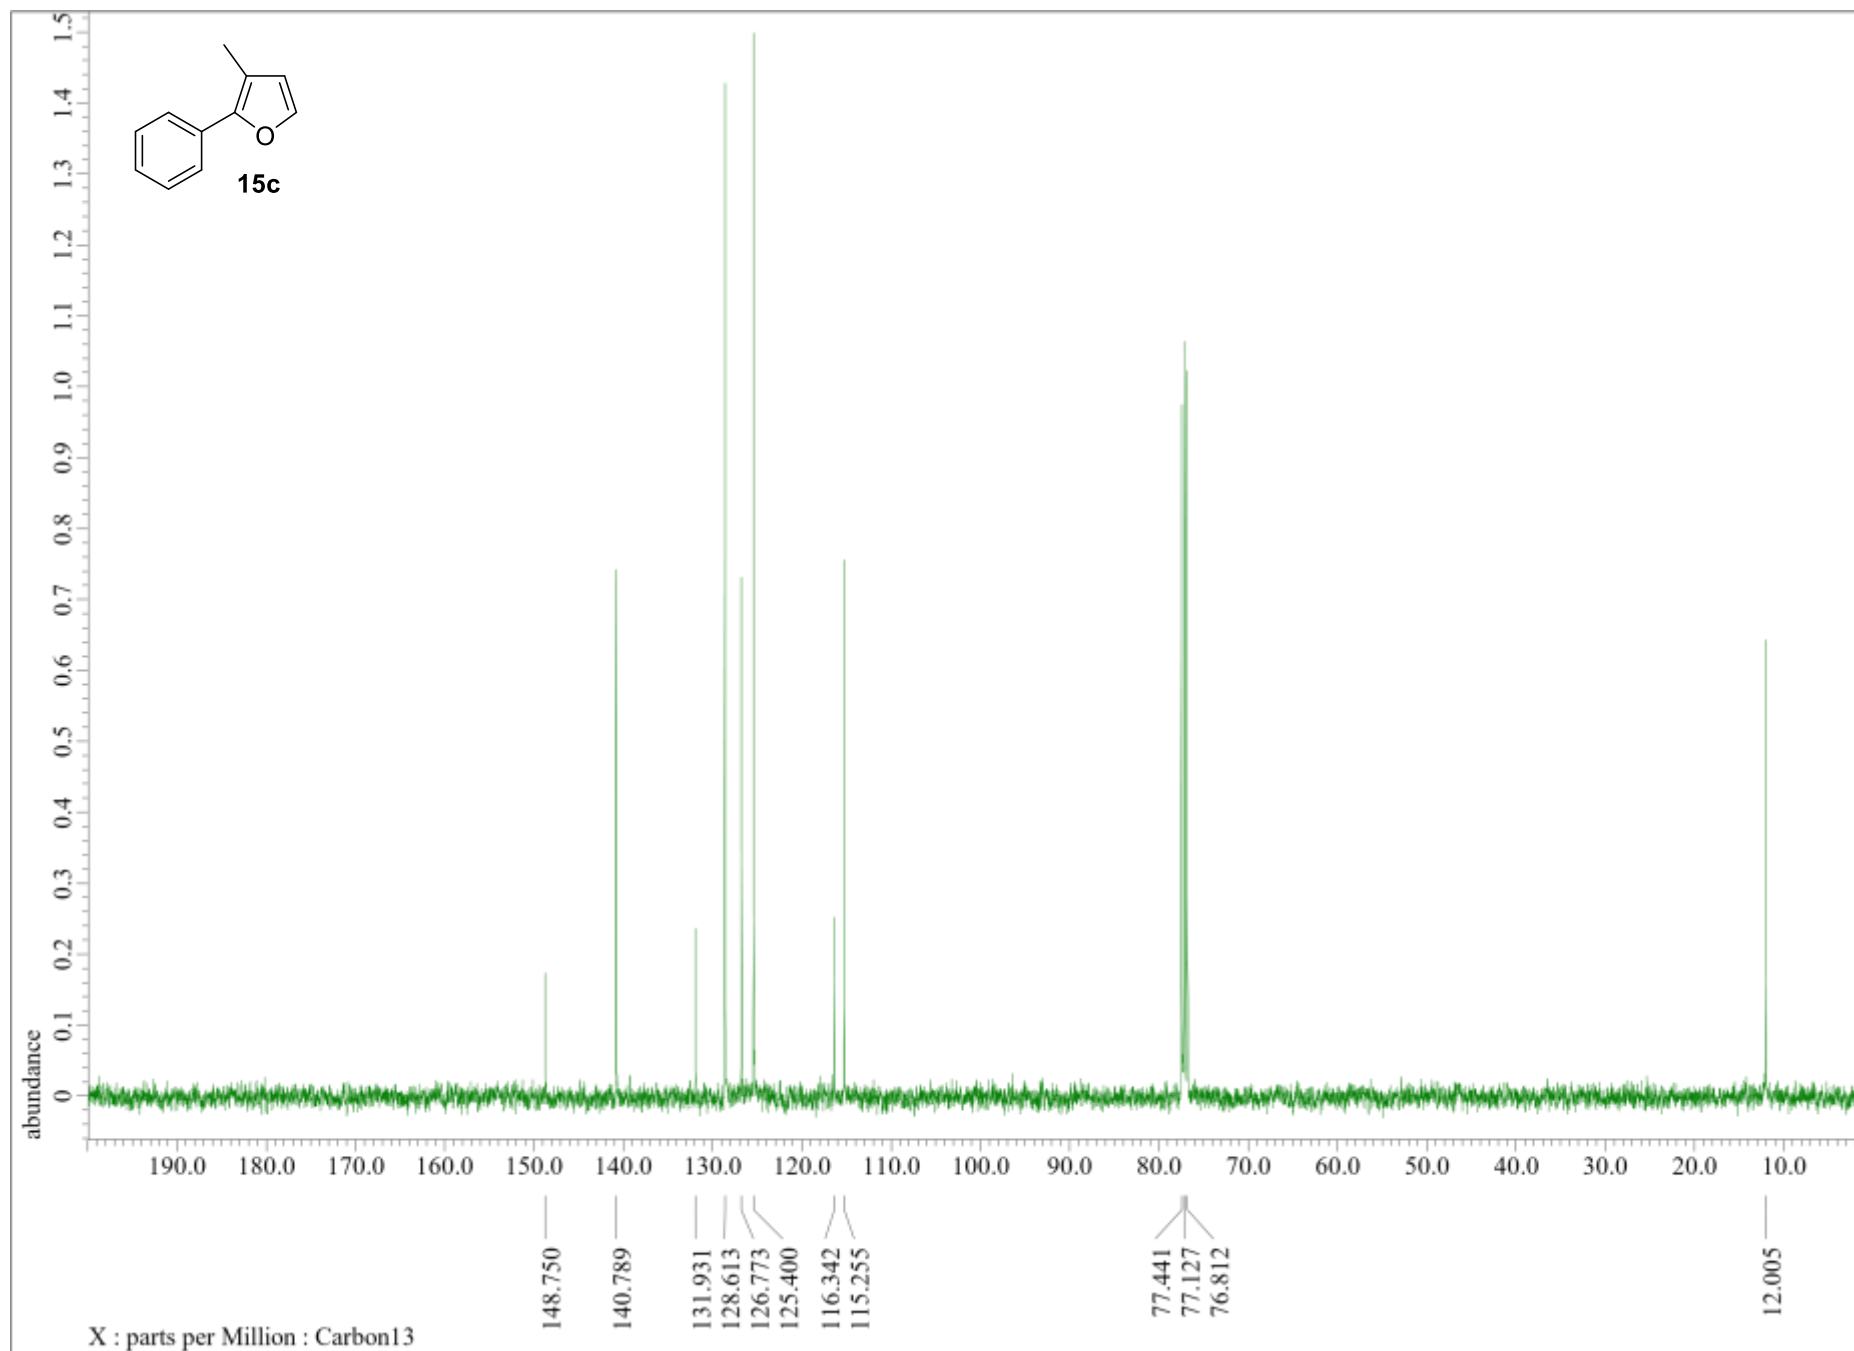

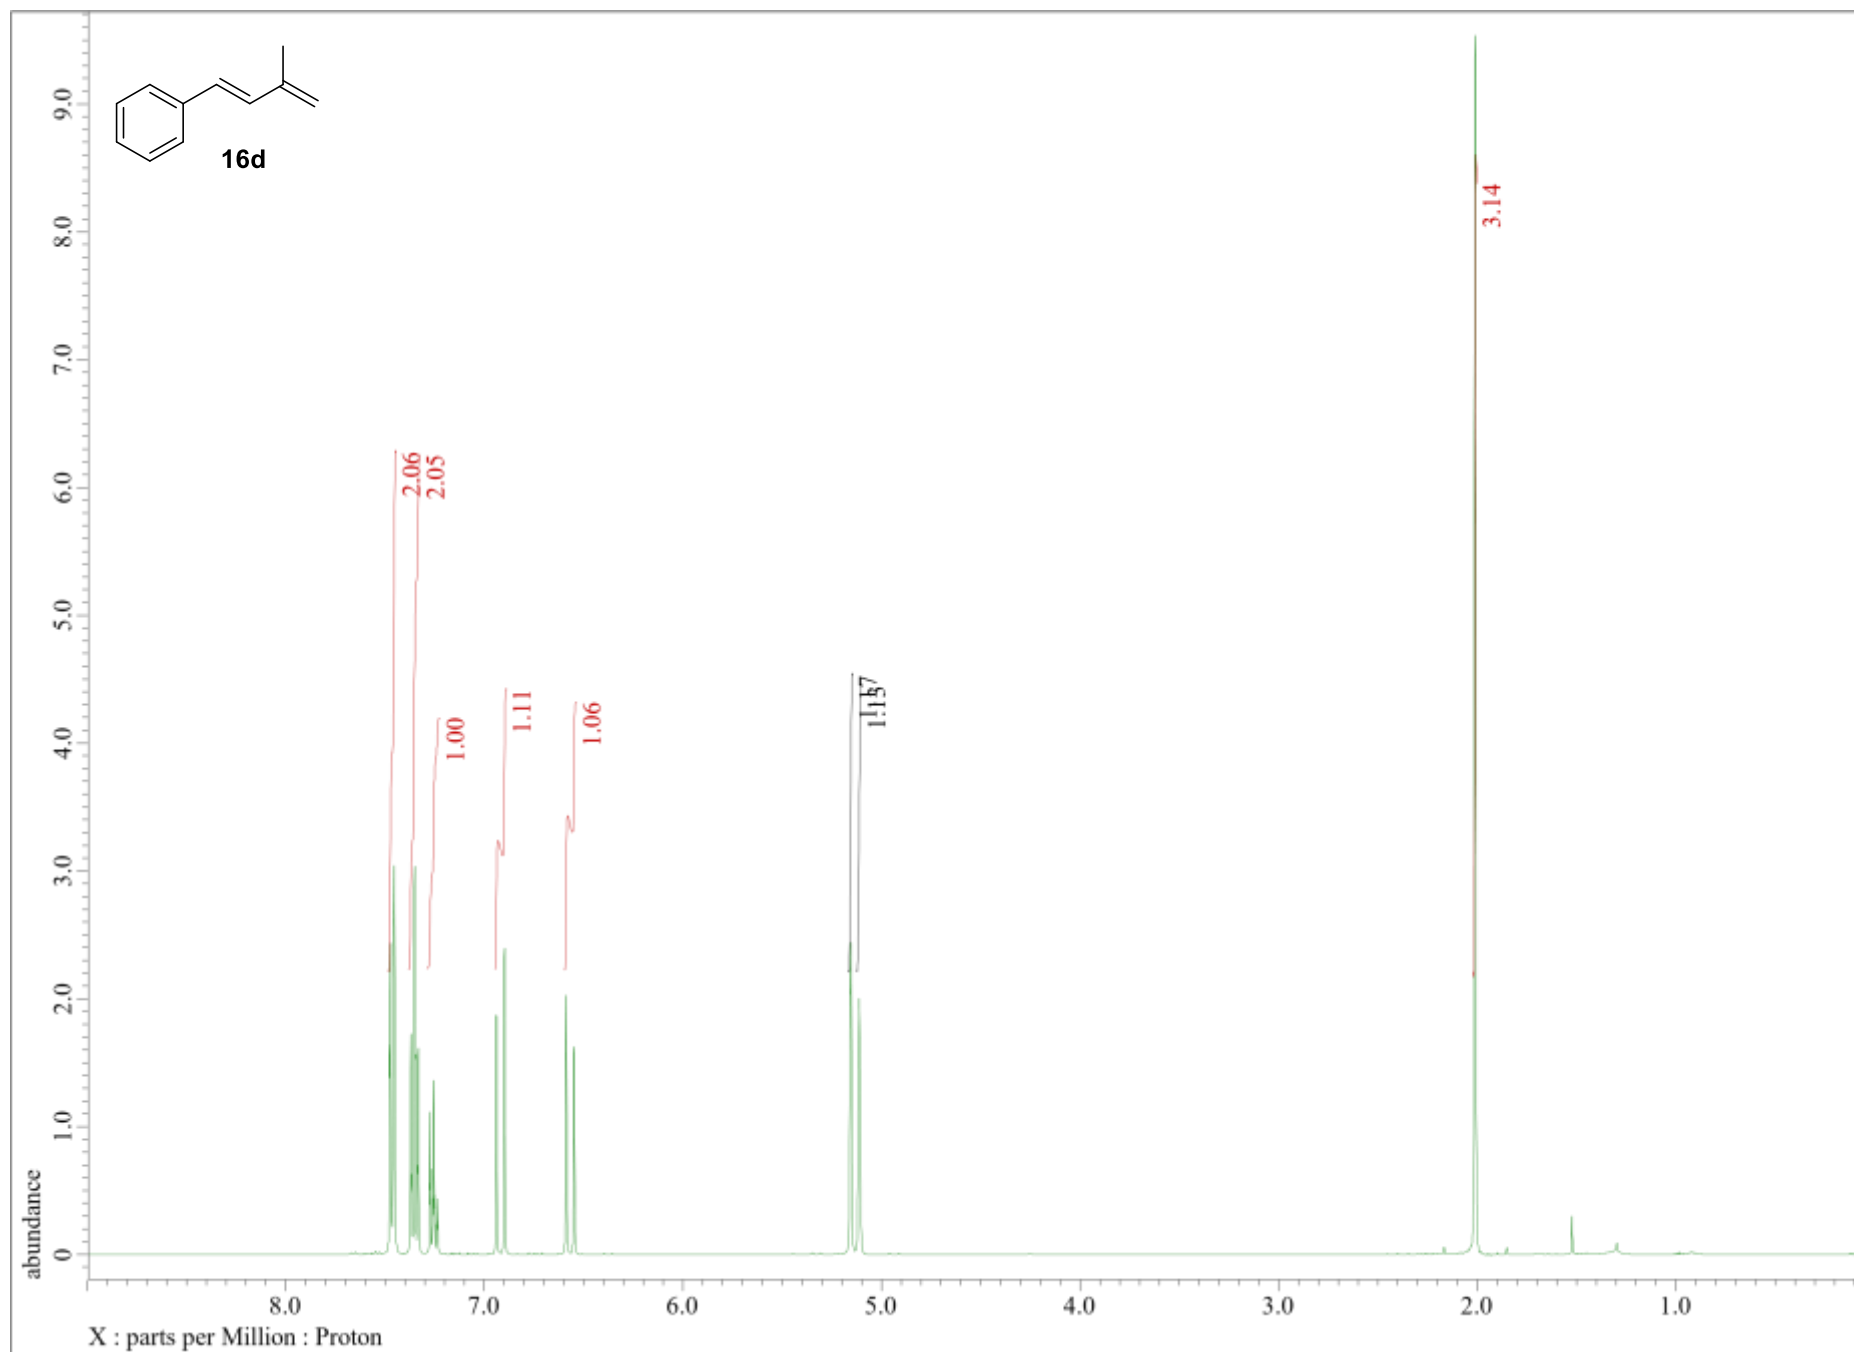

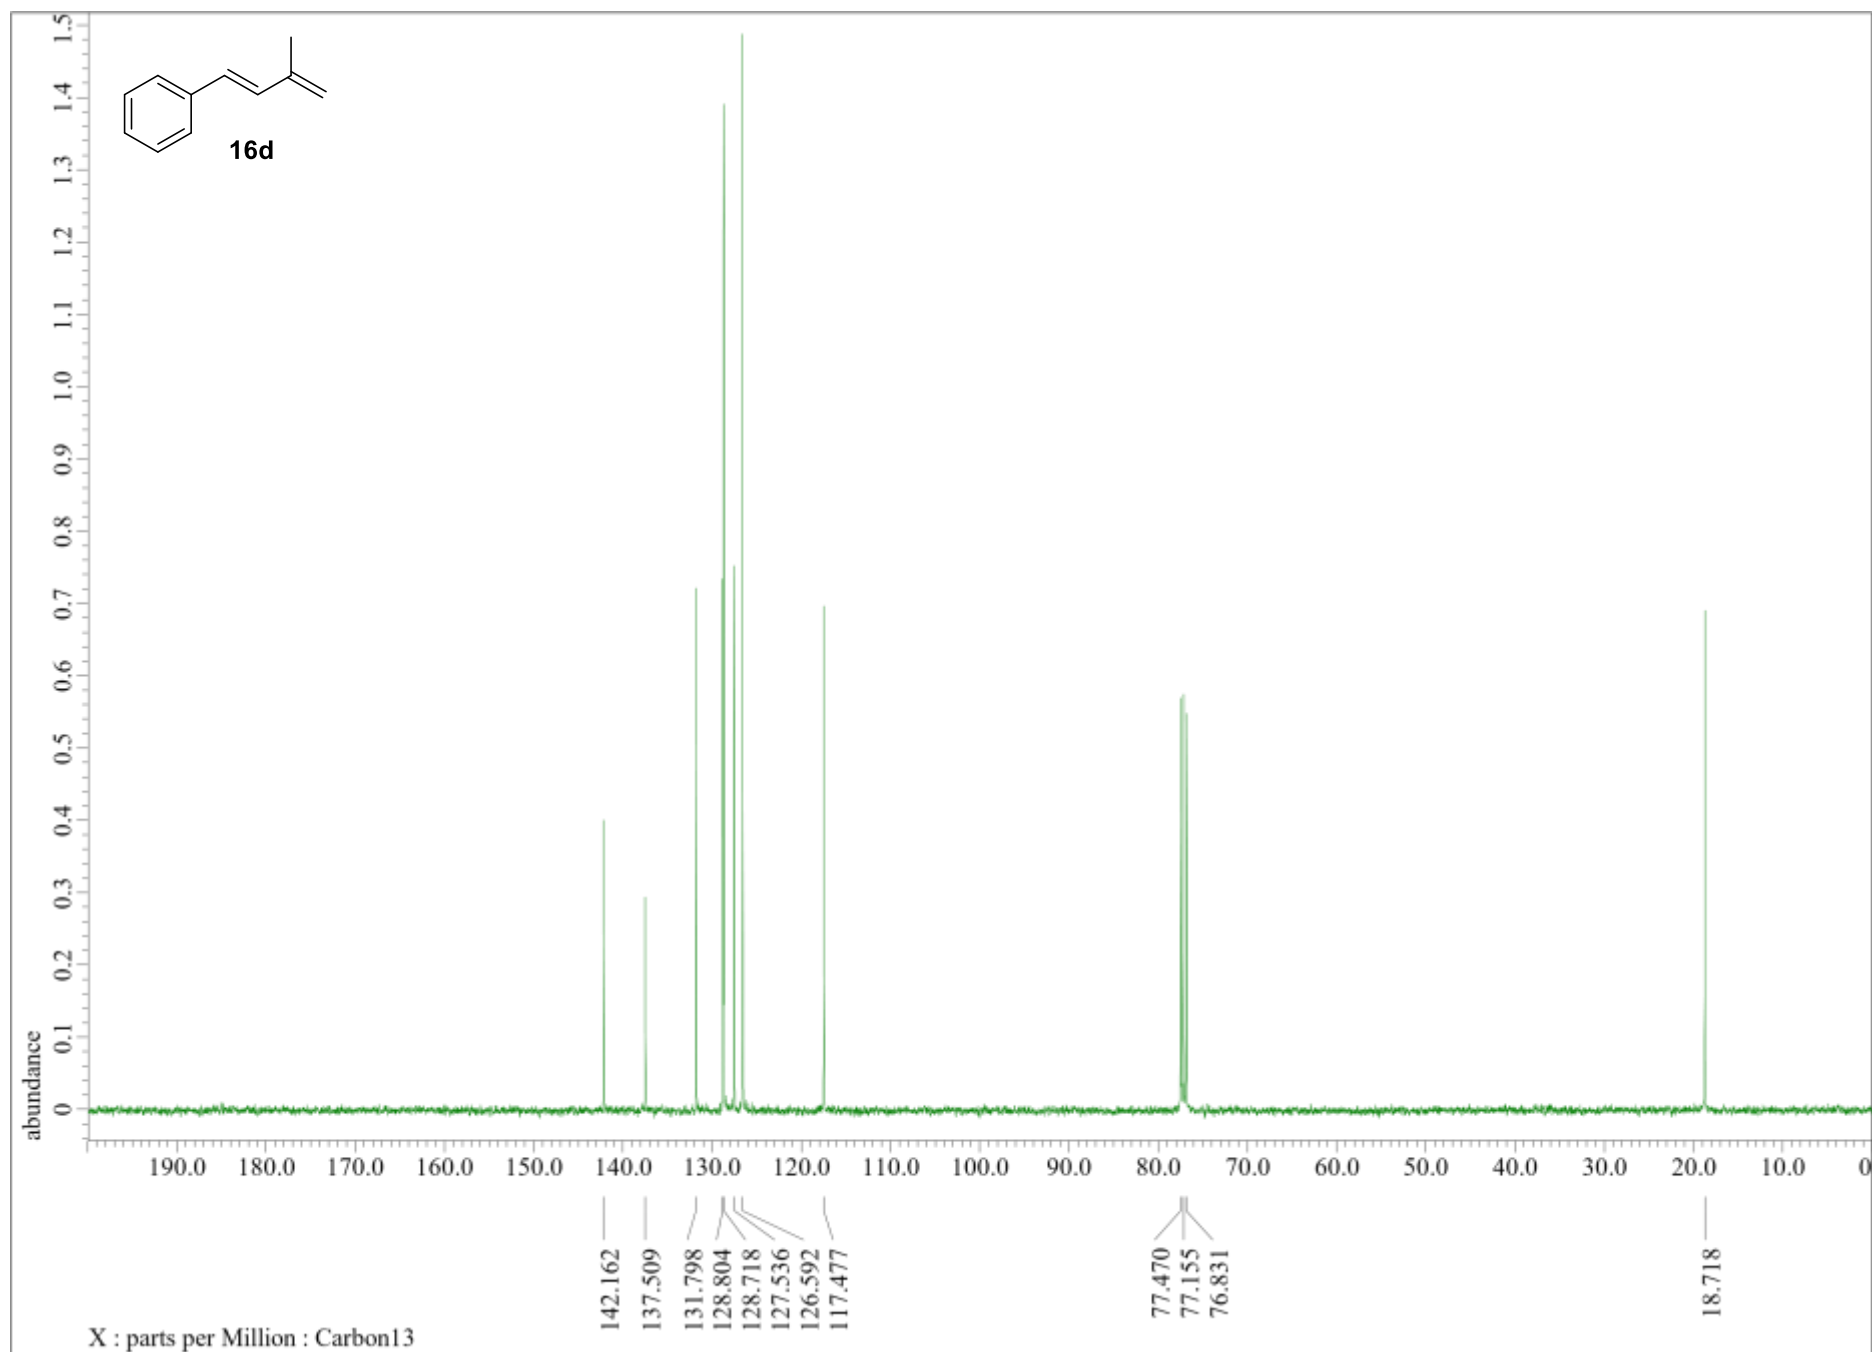

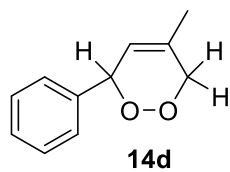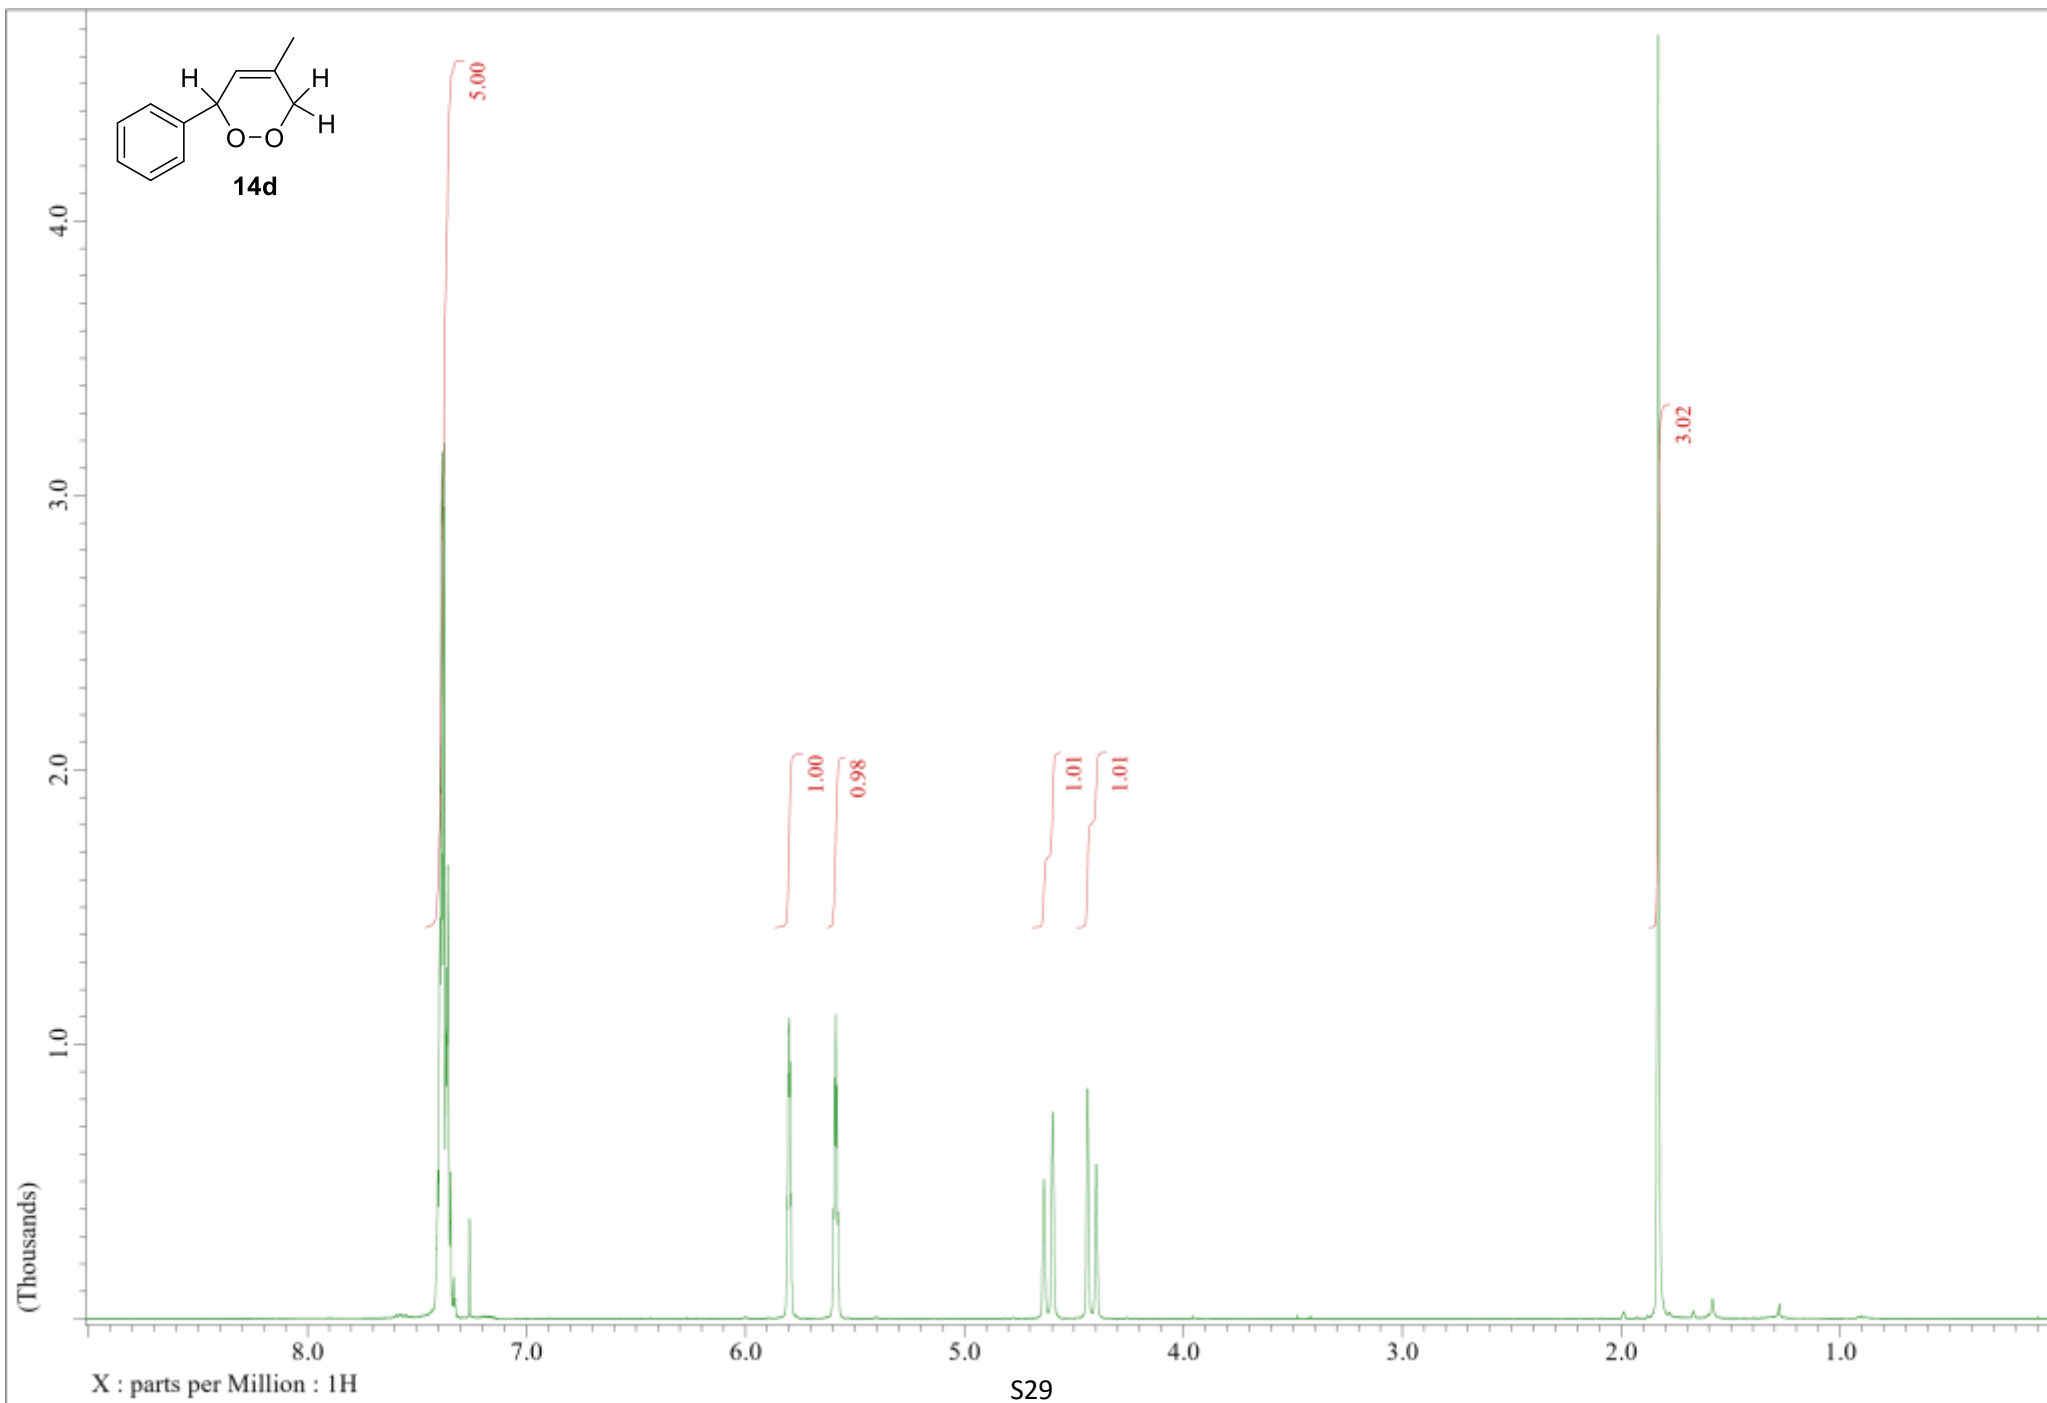

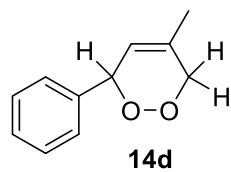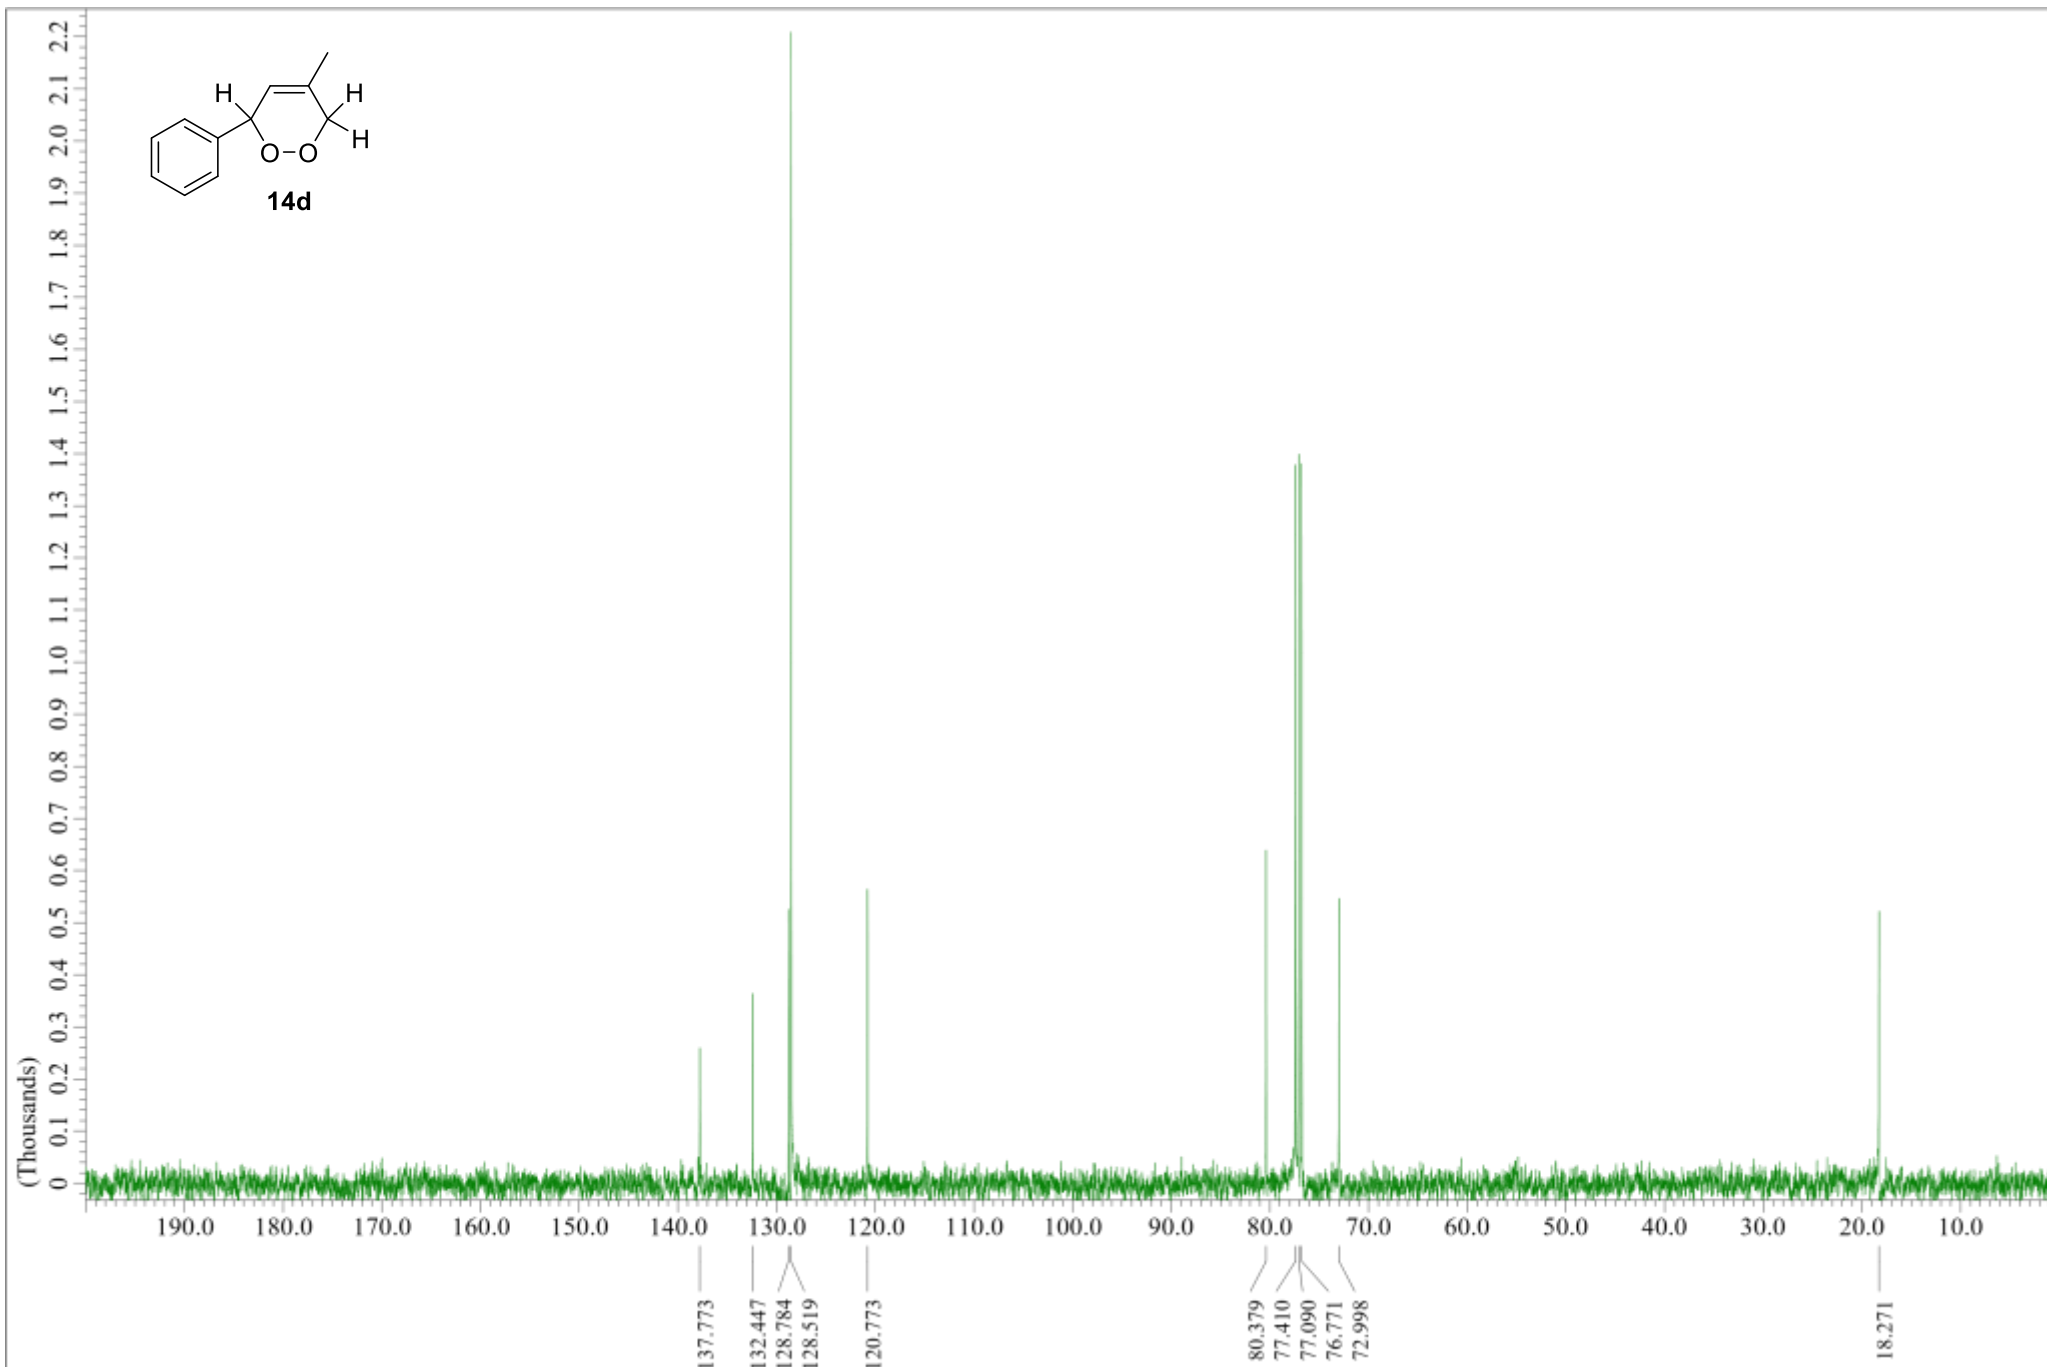

X : parts per Million :  $^{13}\text{C}$

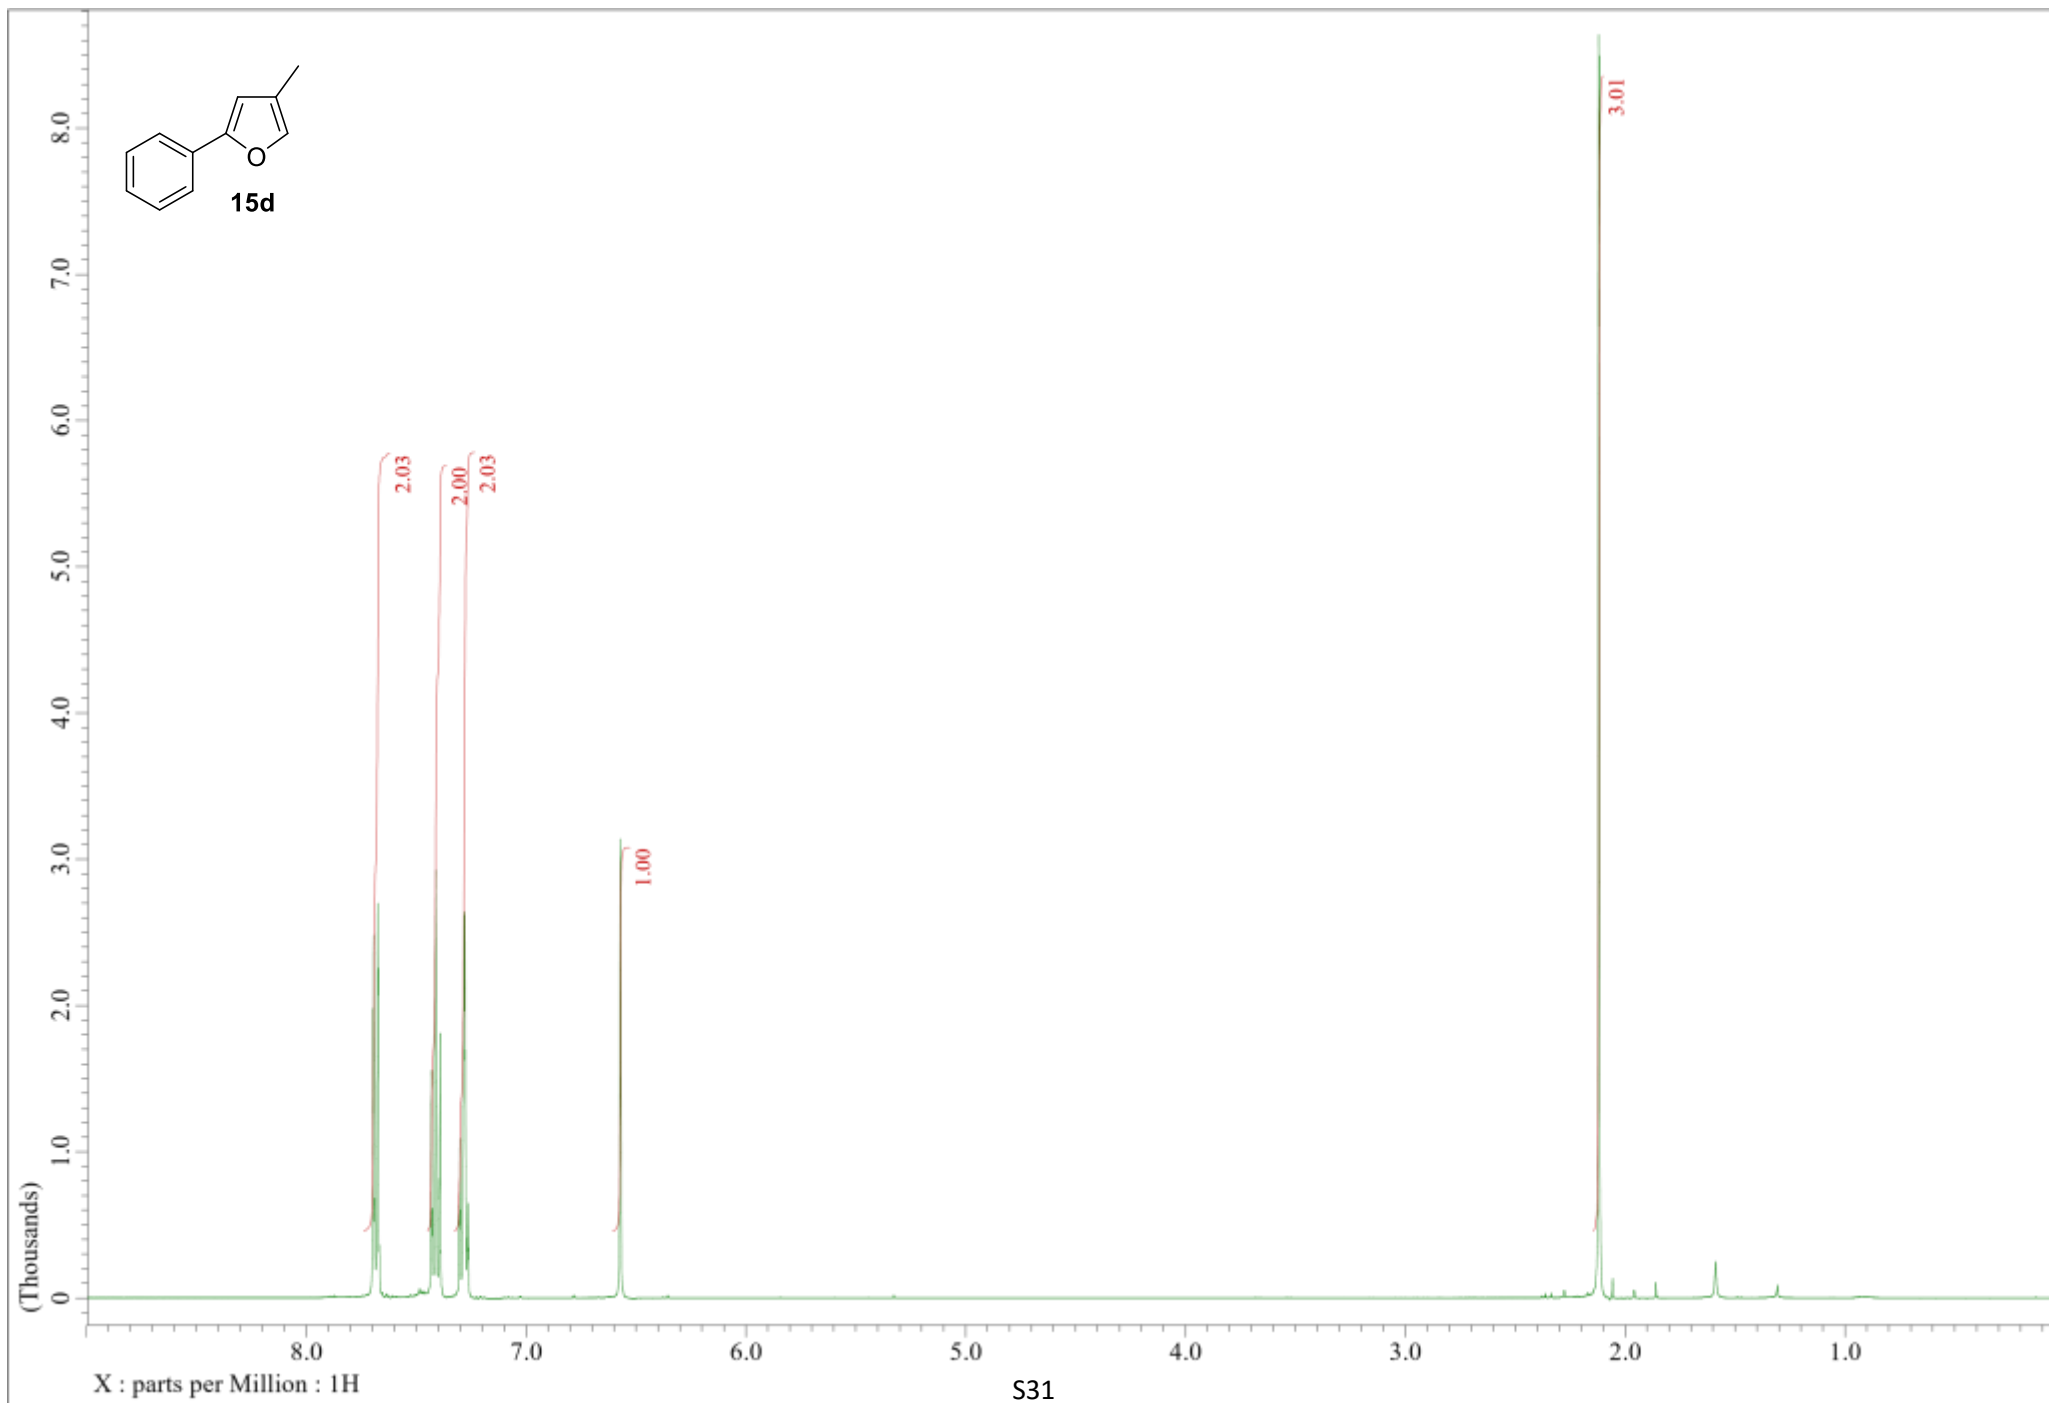

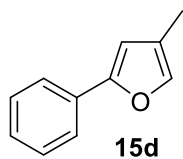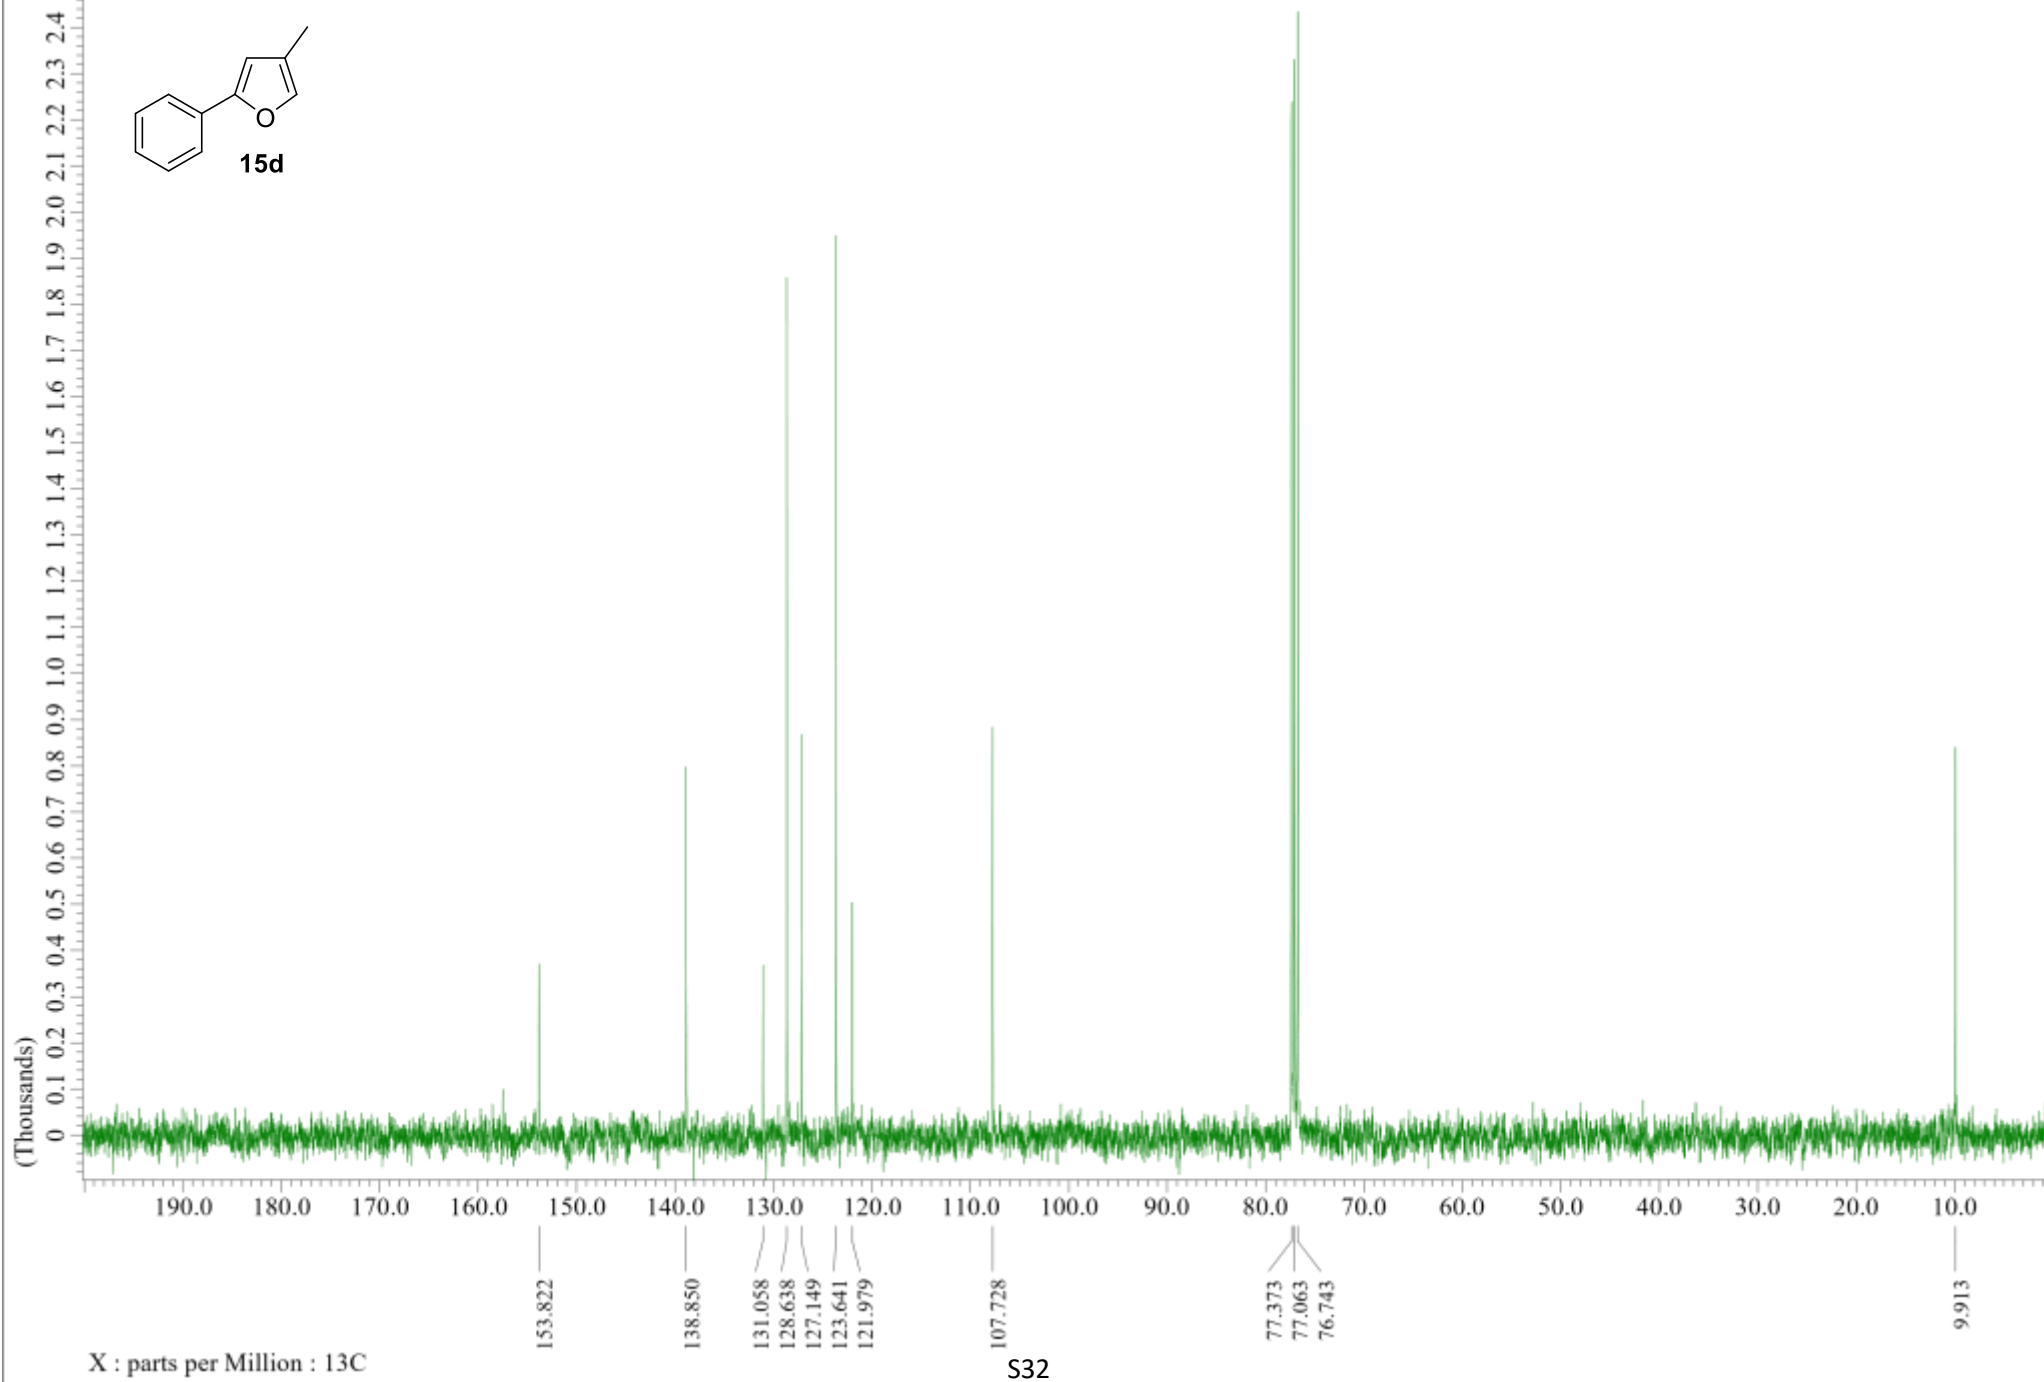



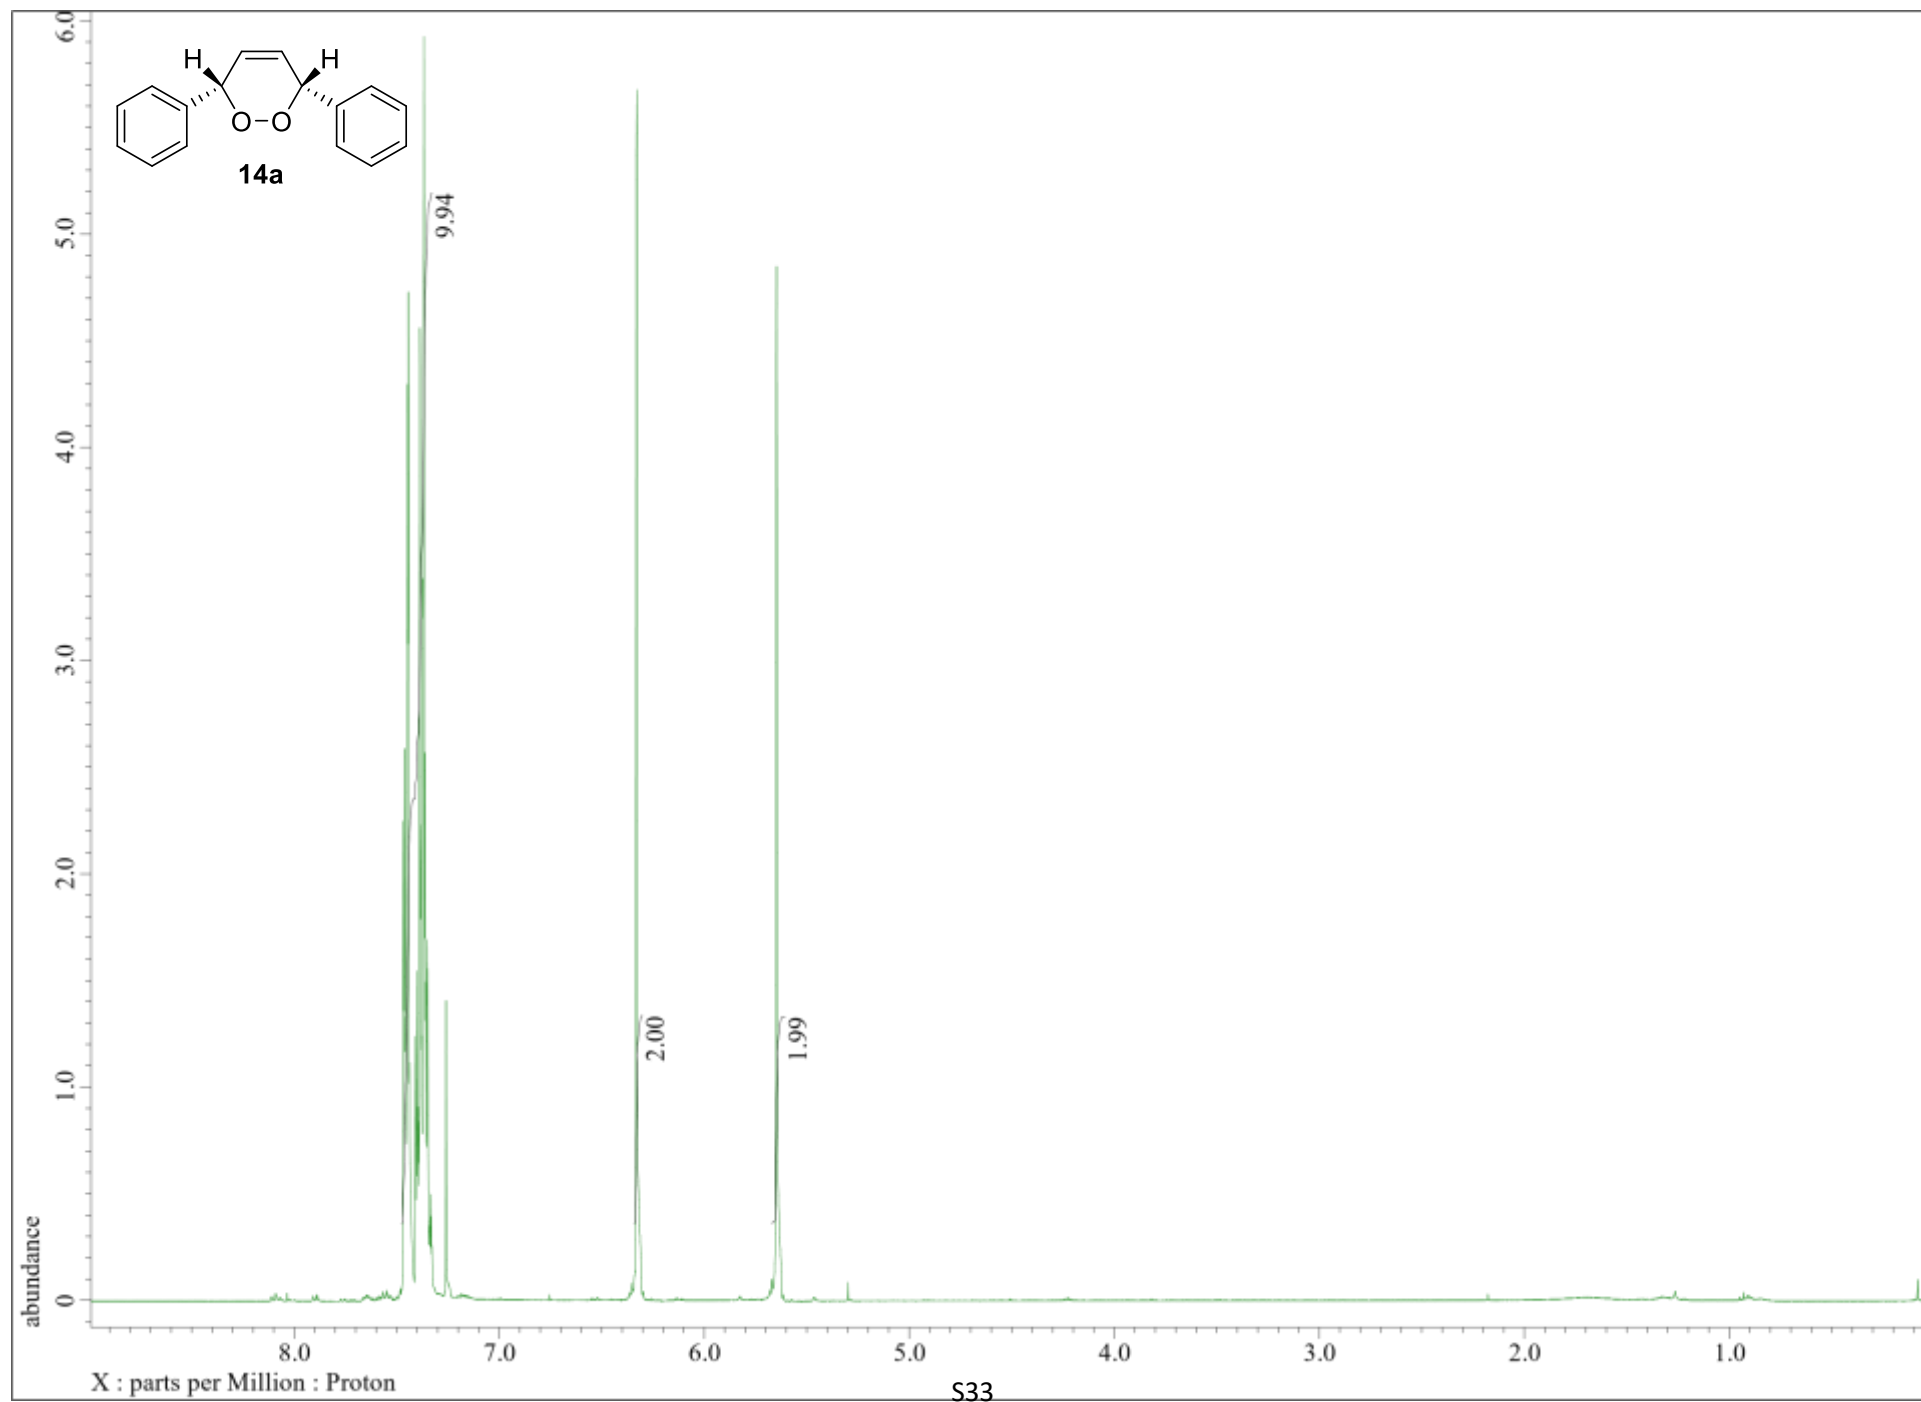

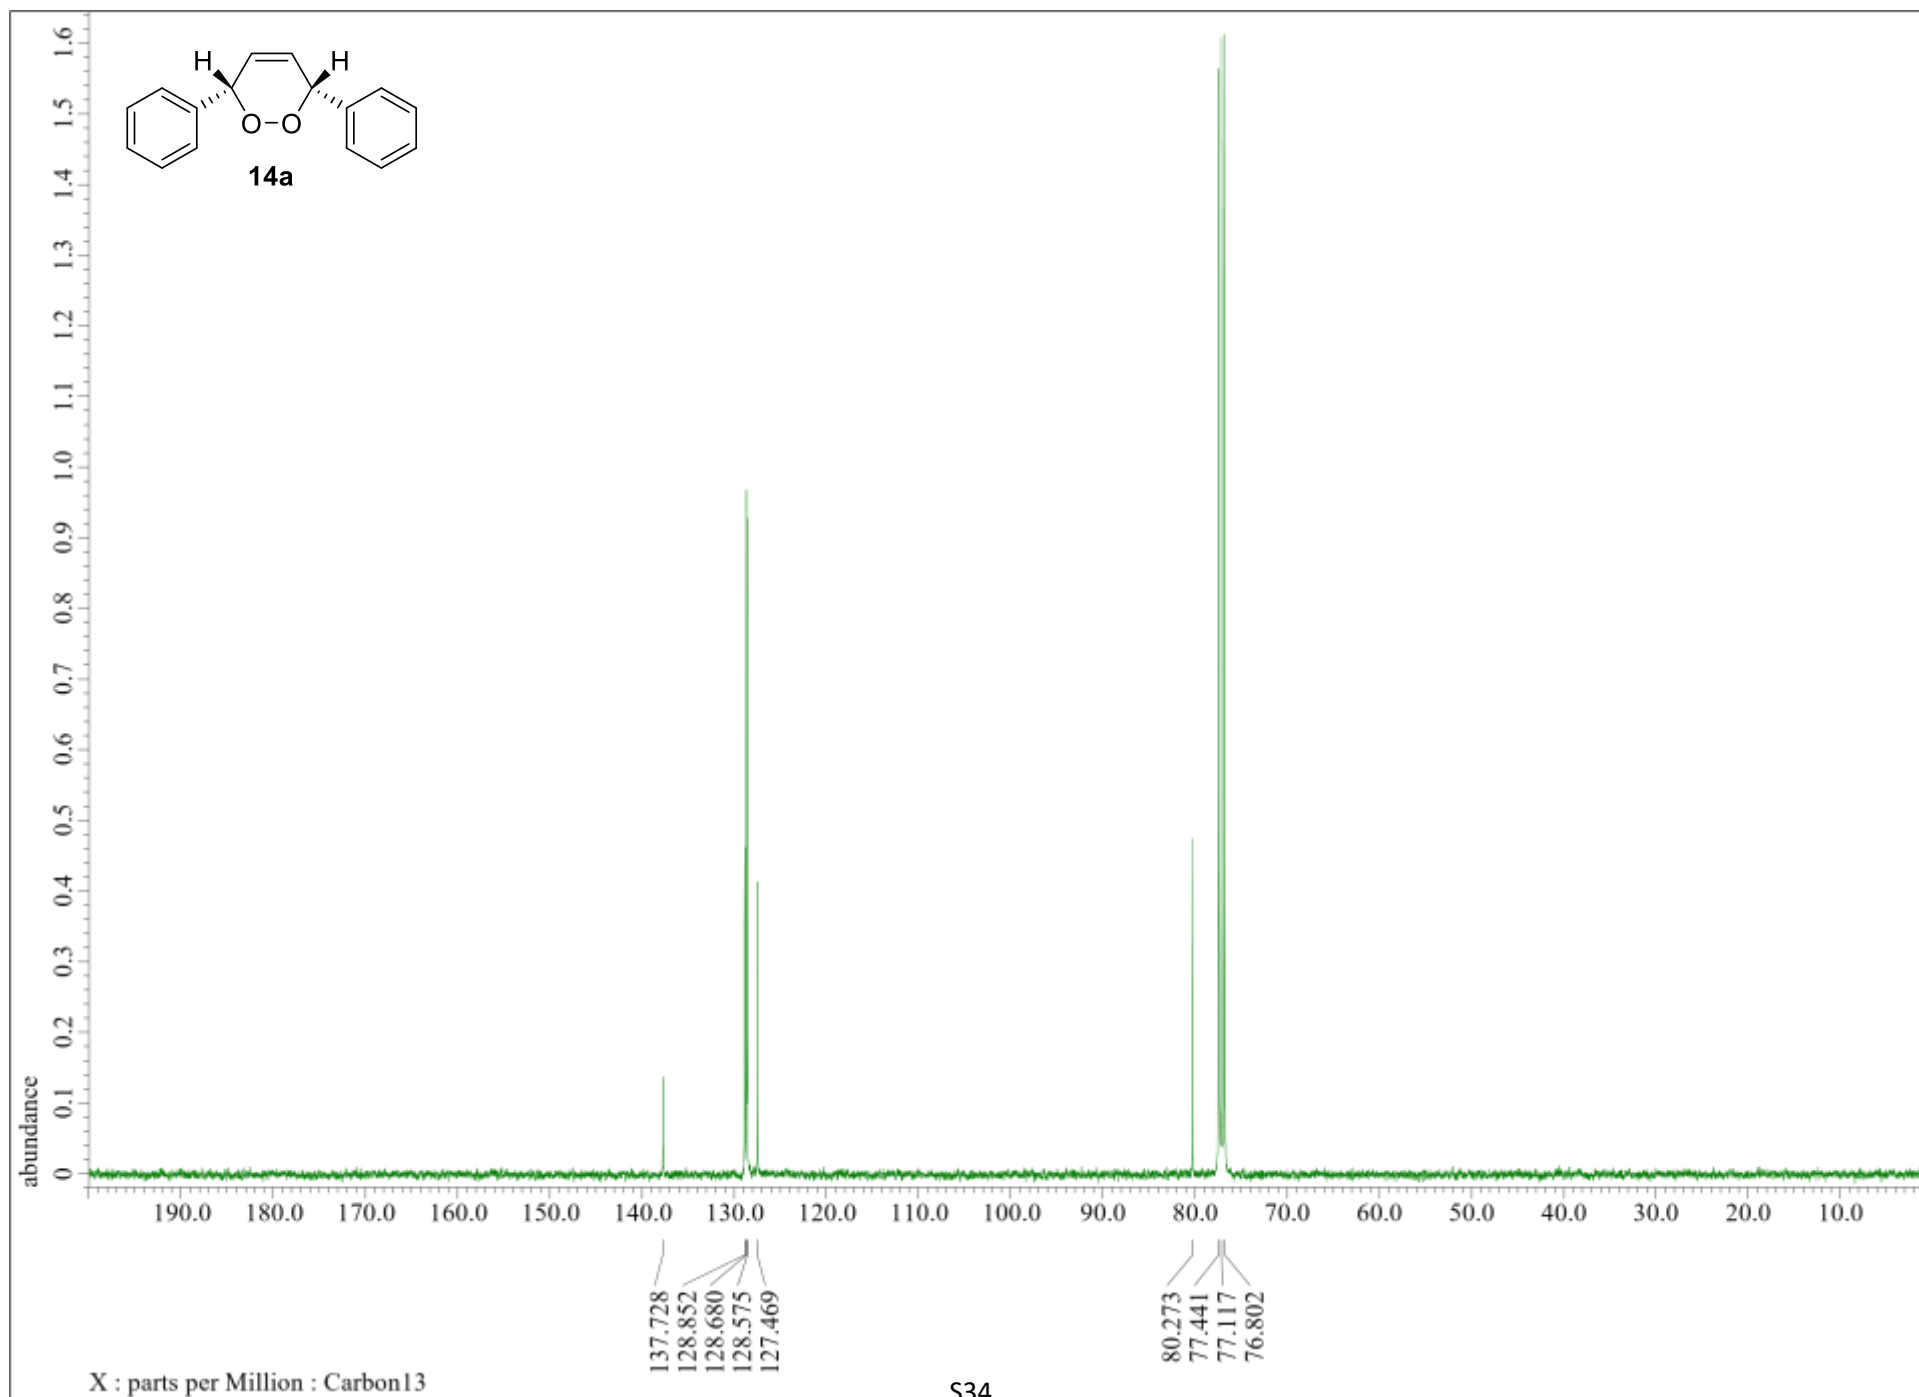

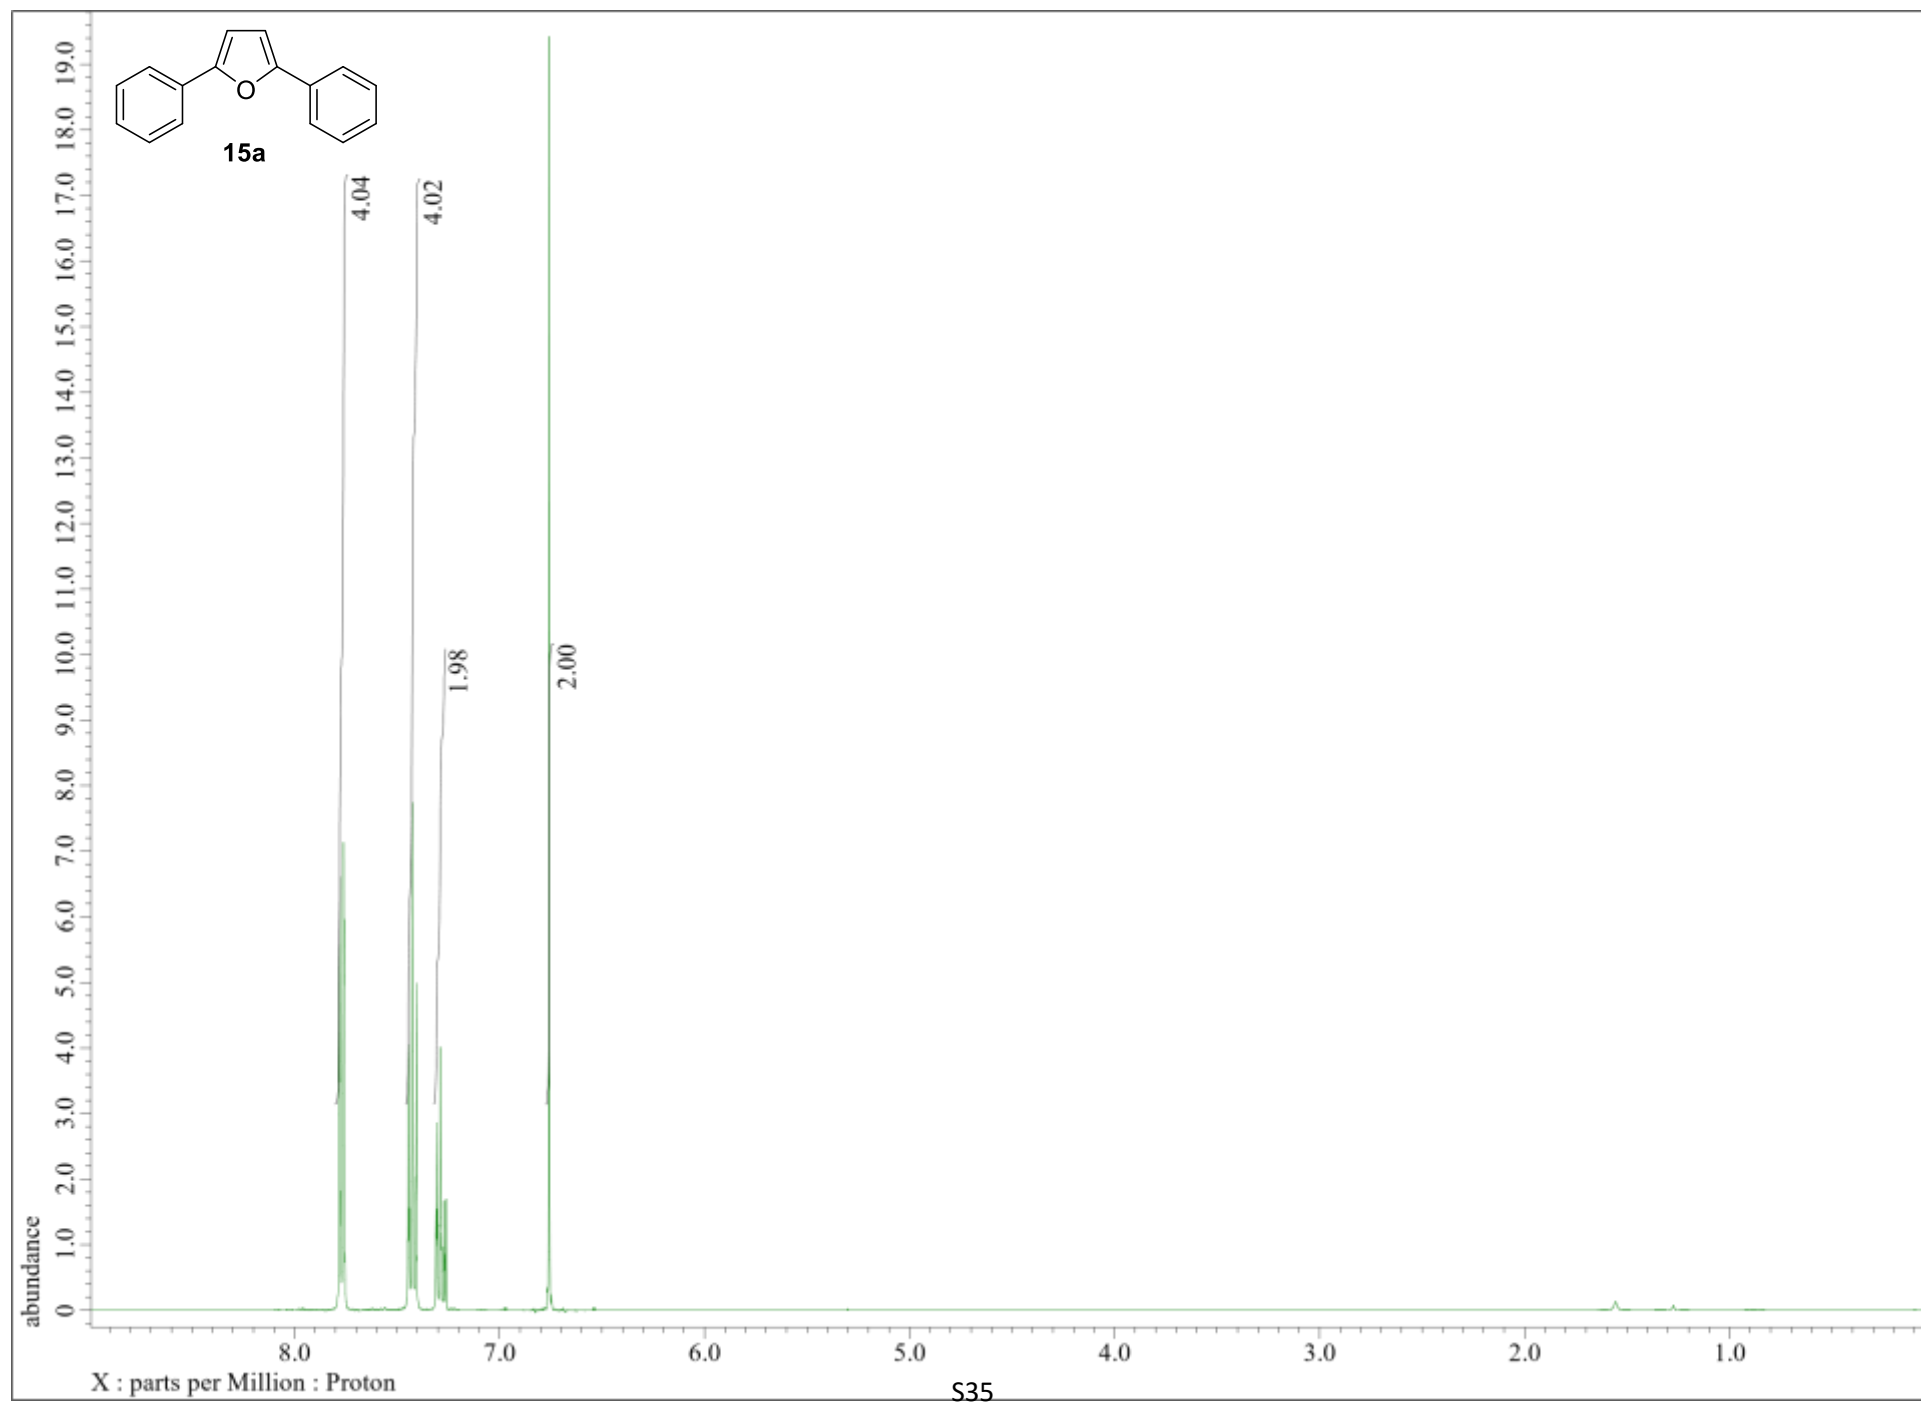

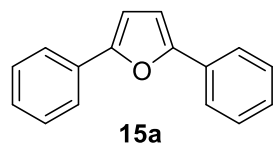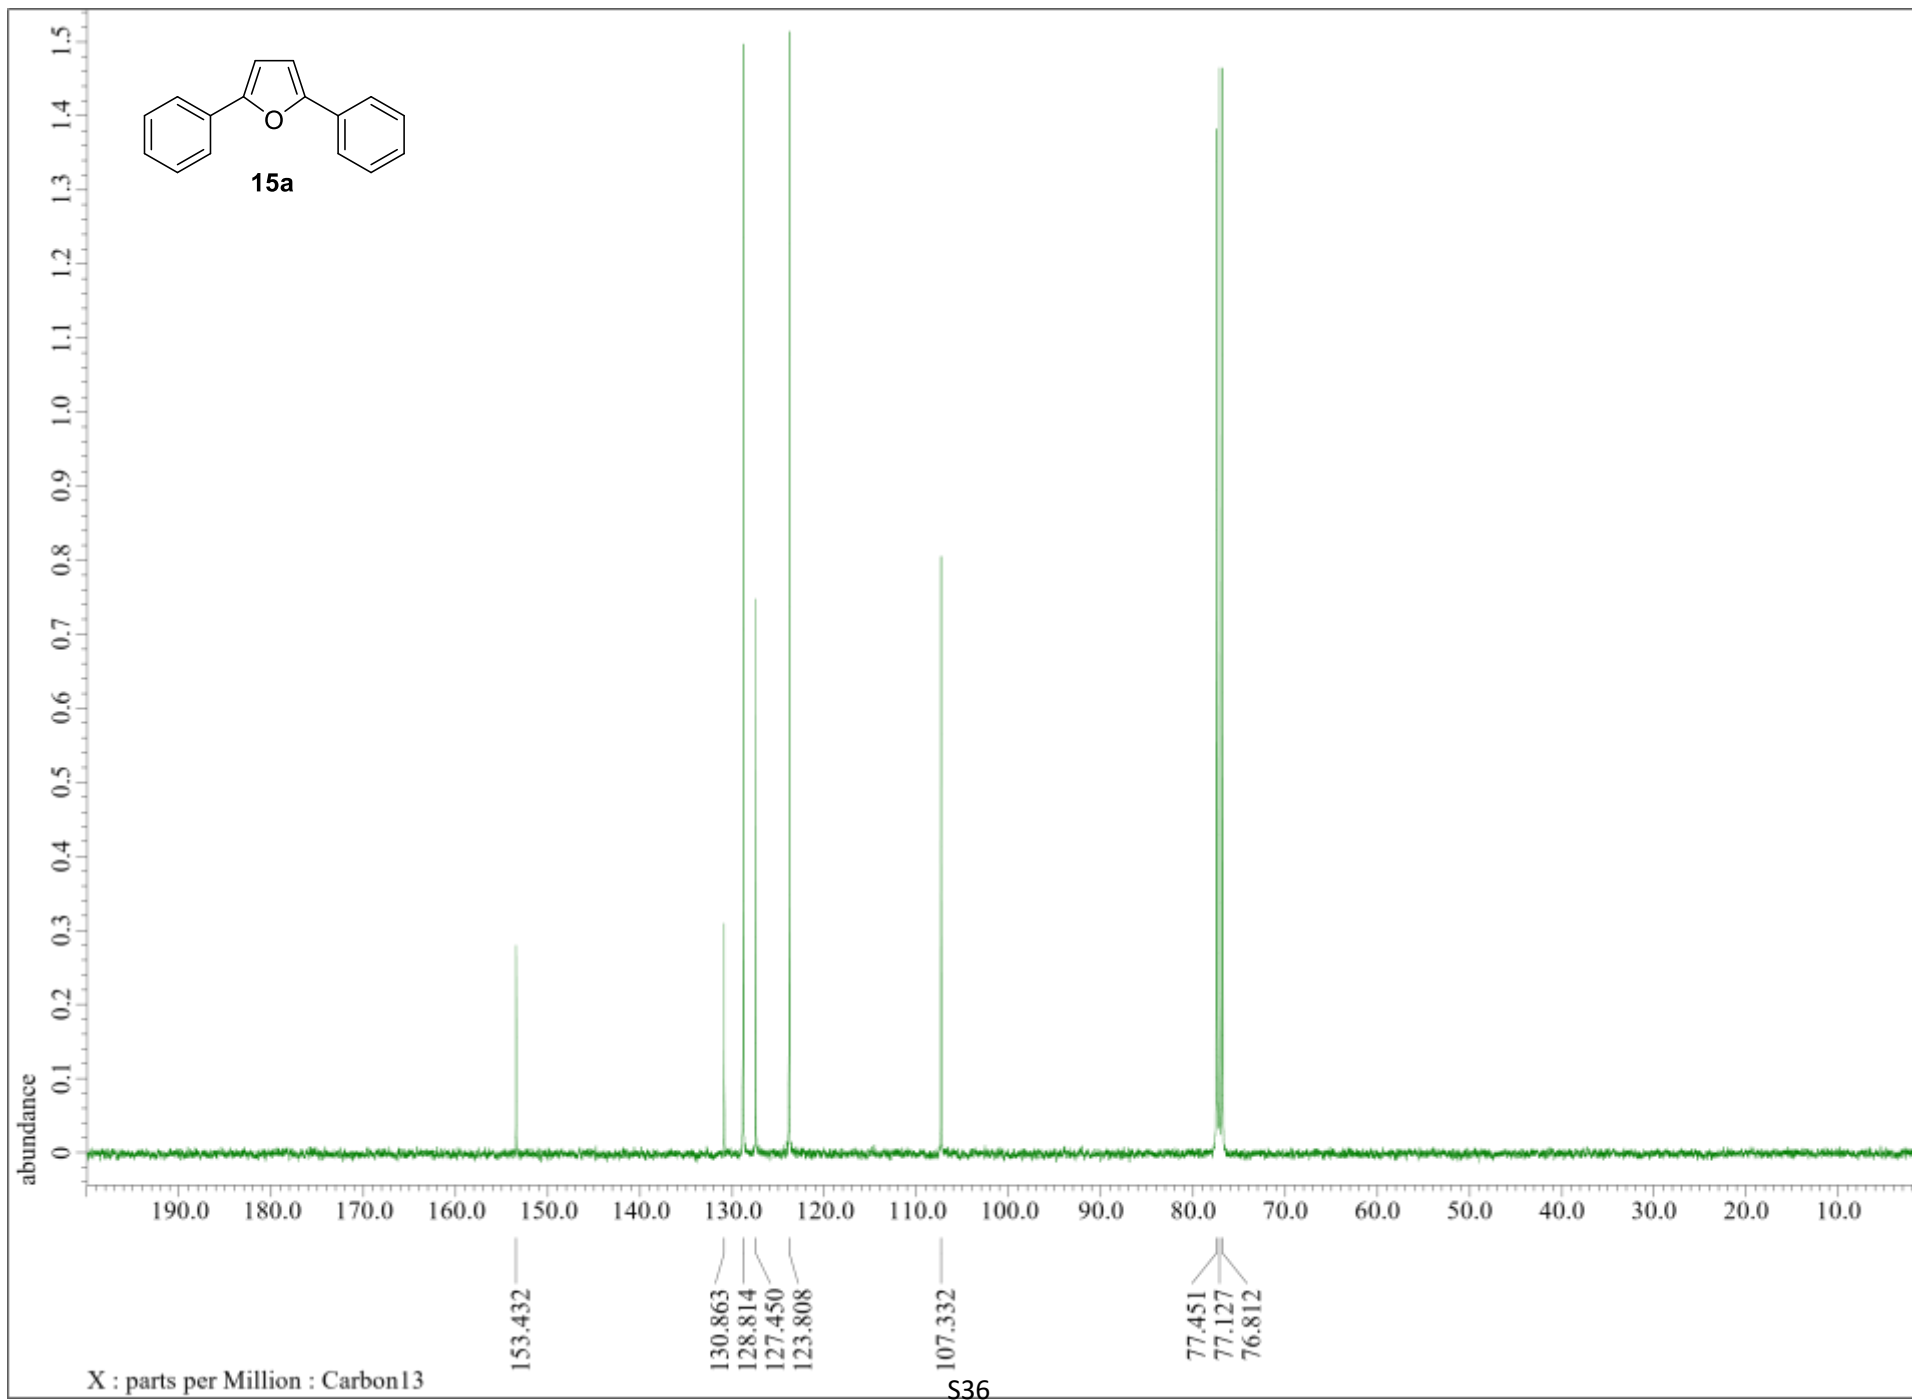

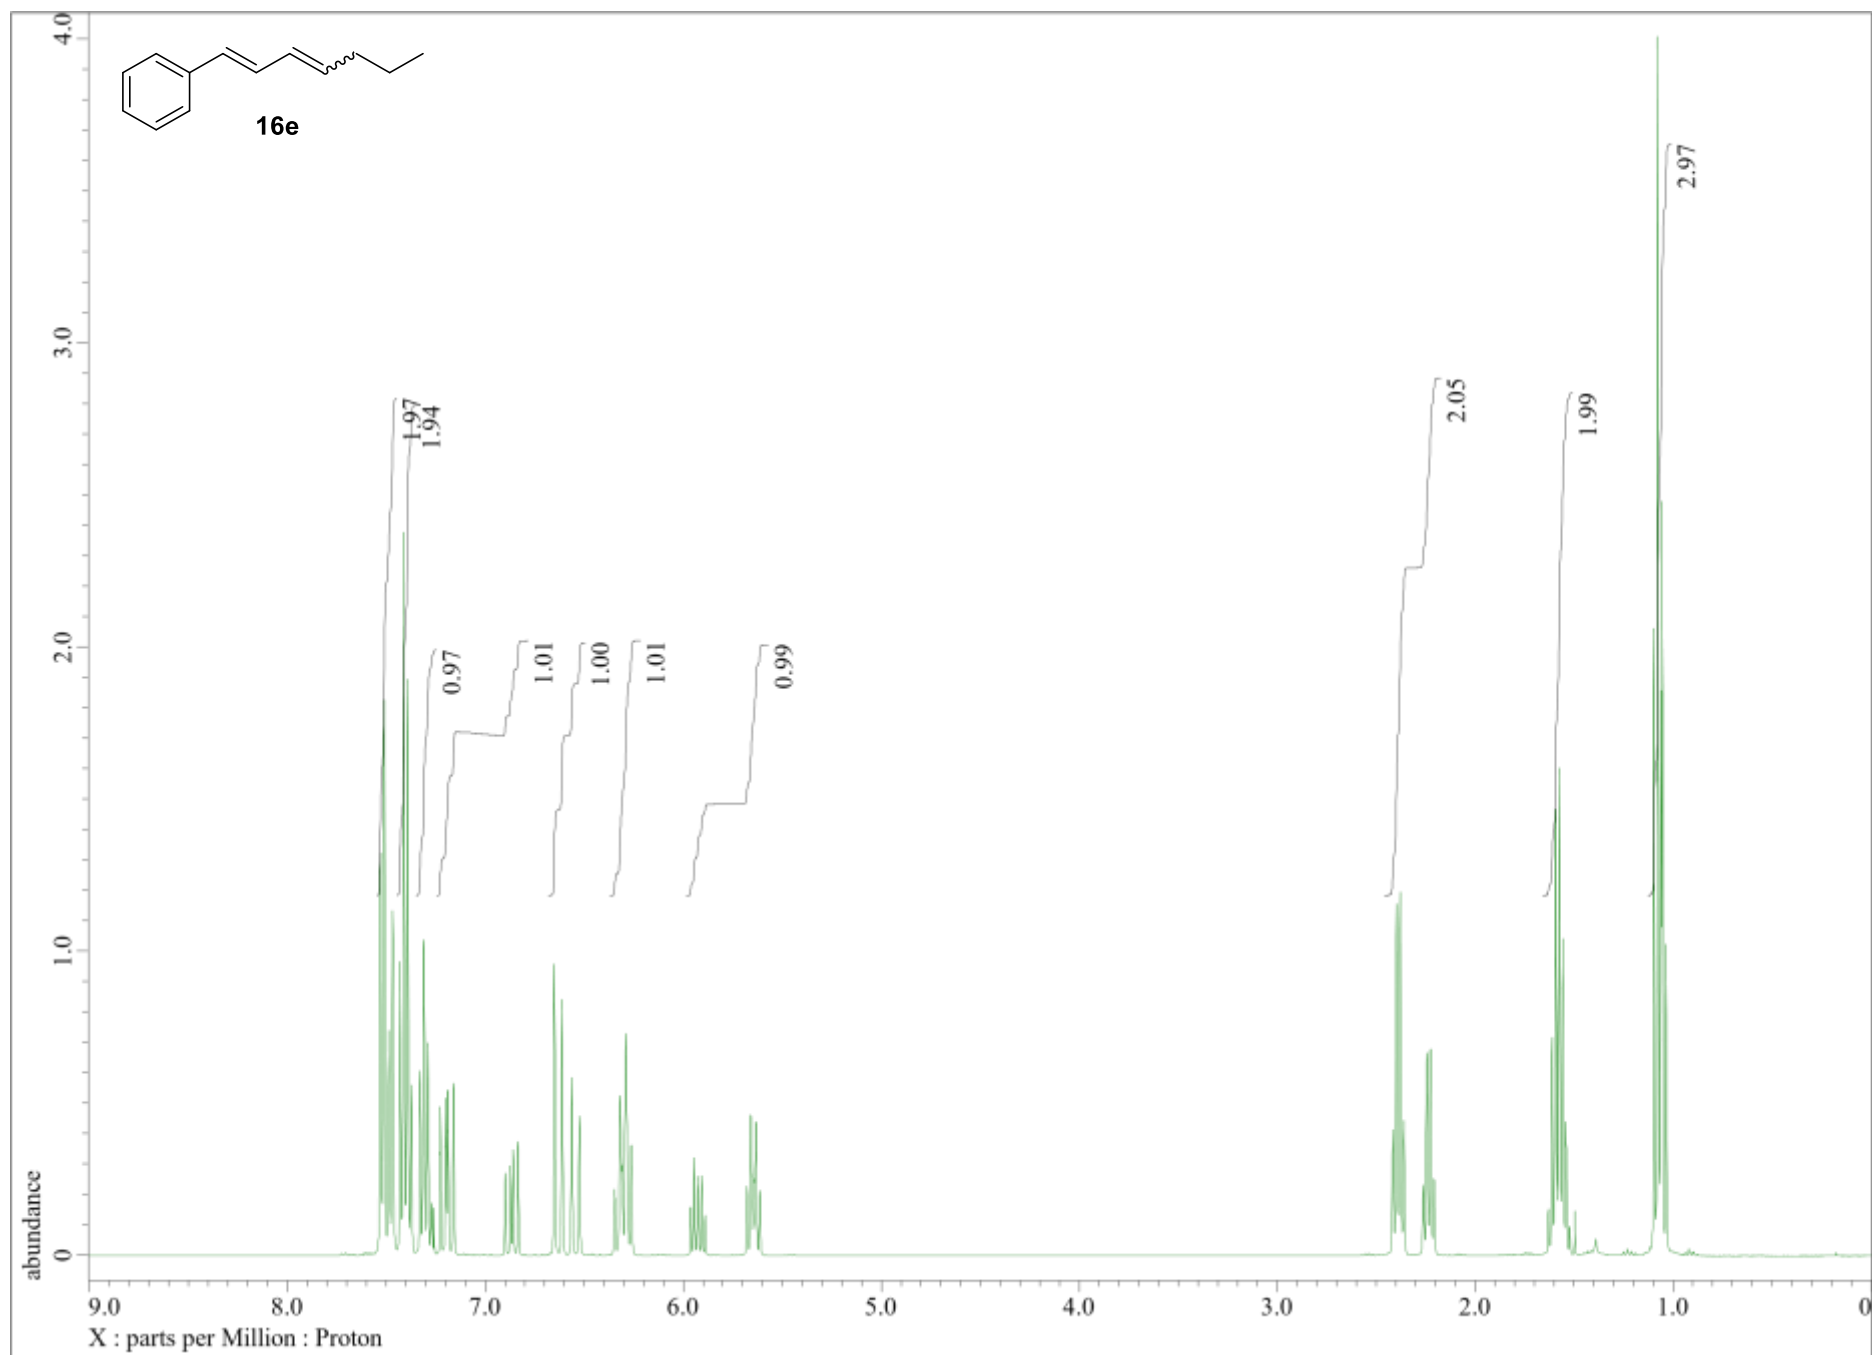

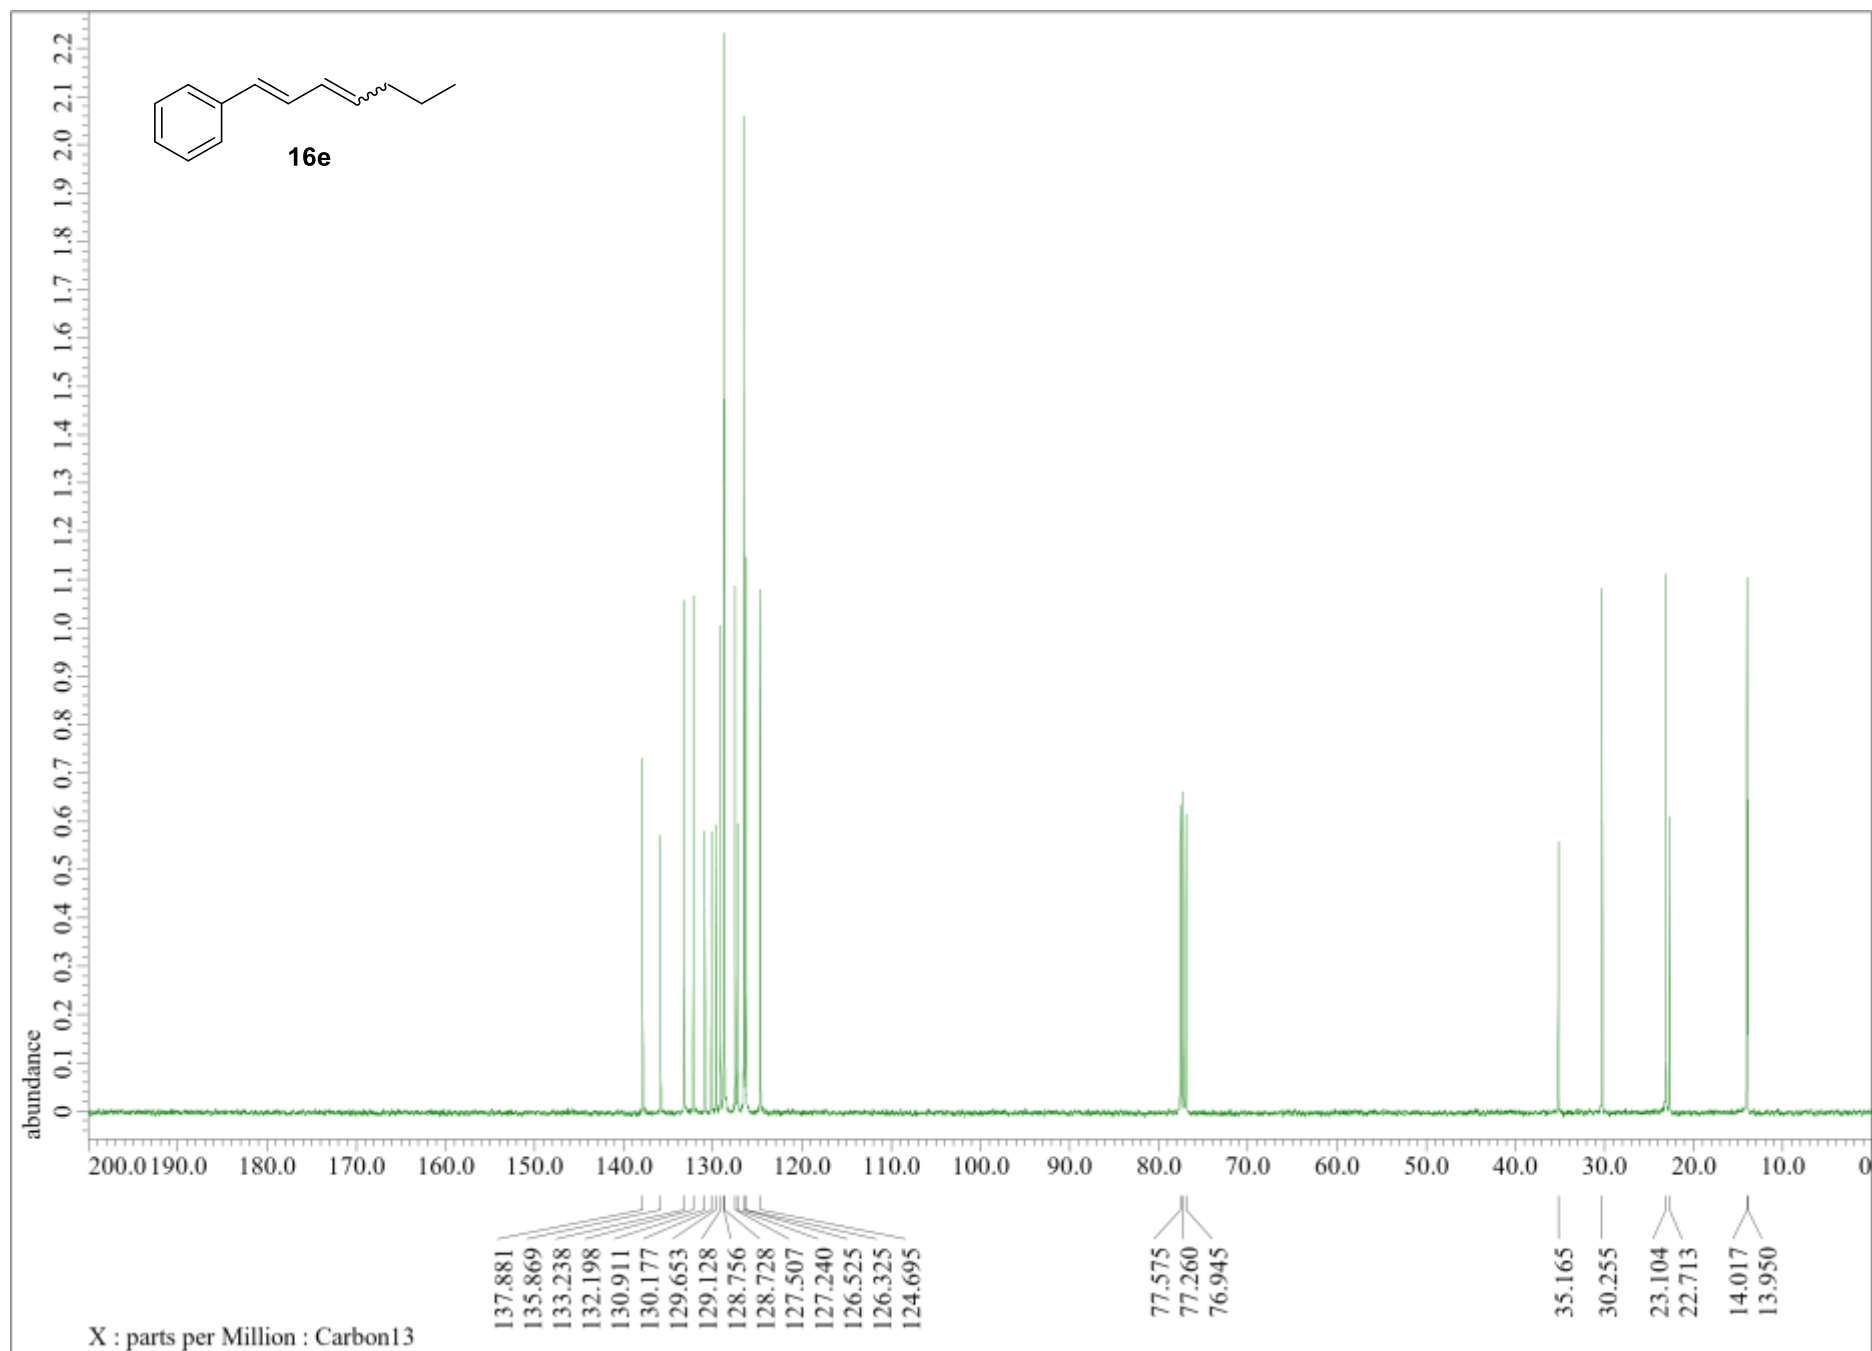

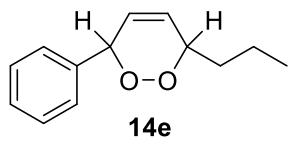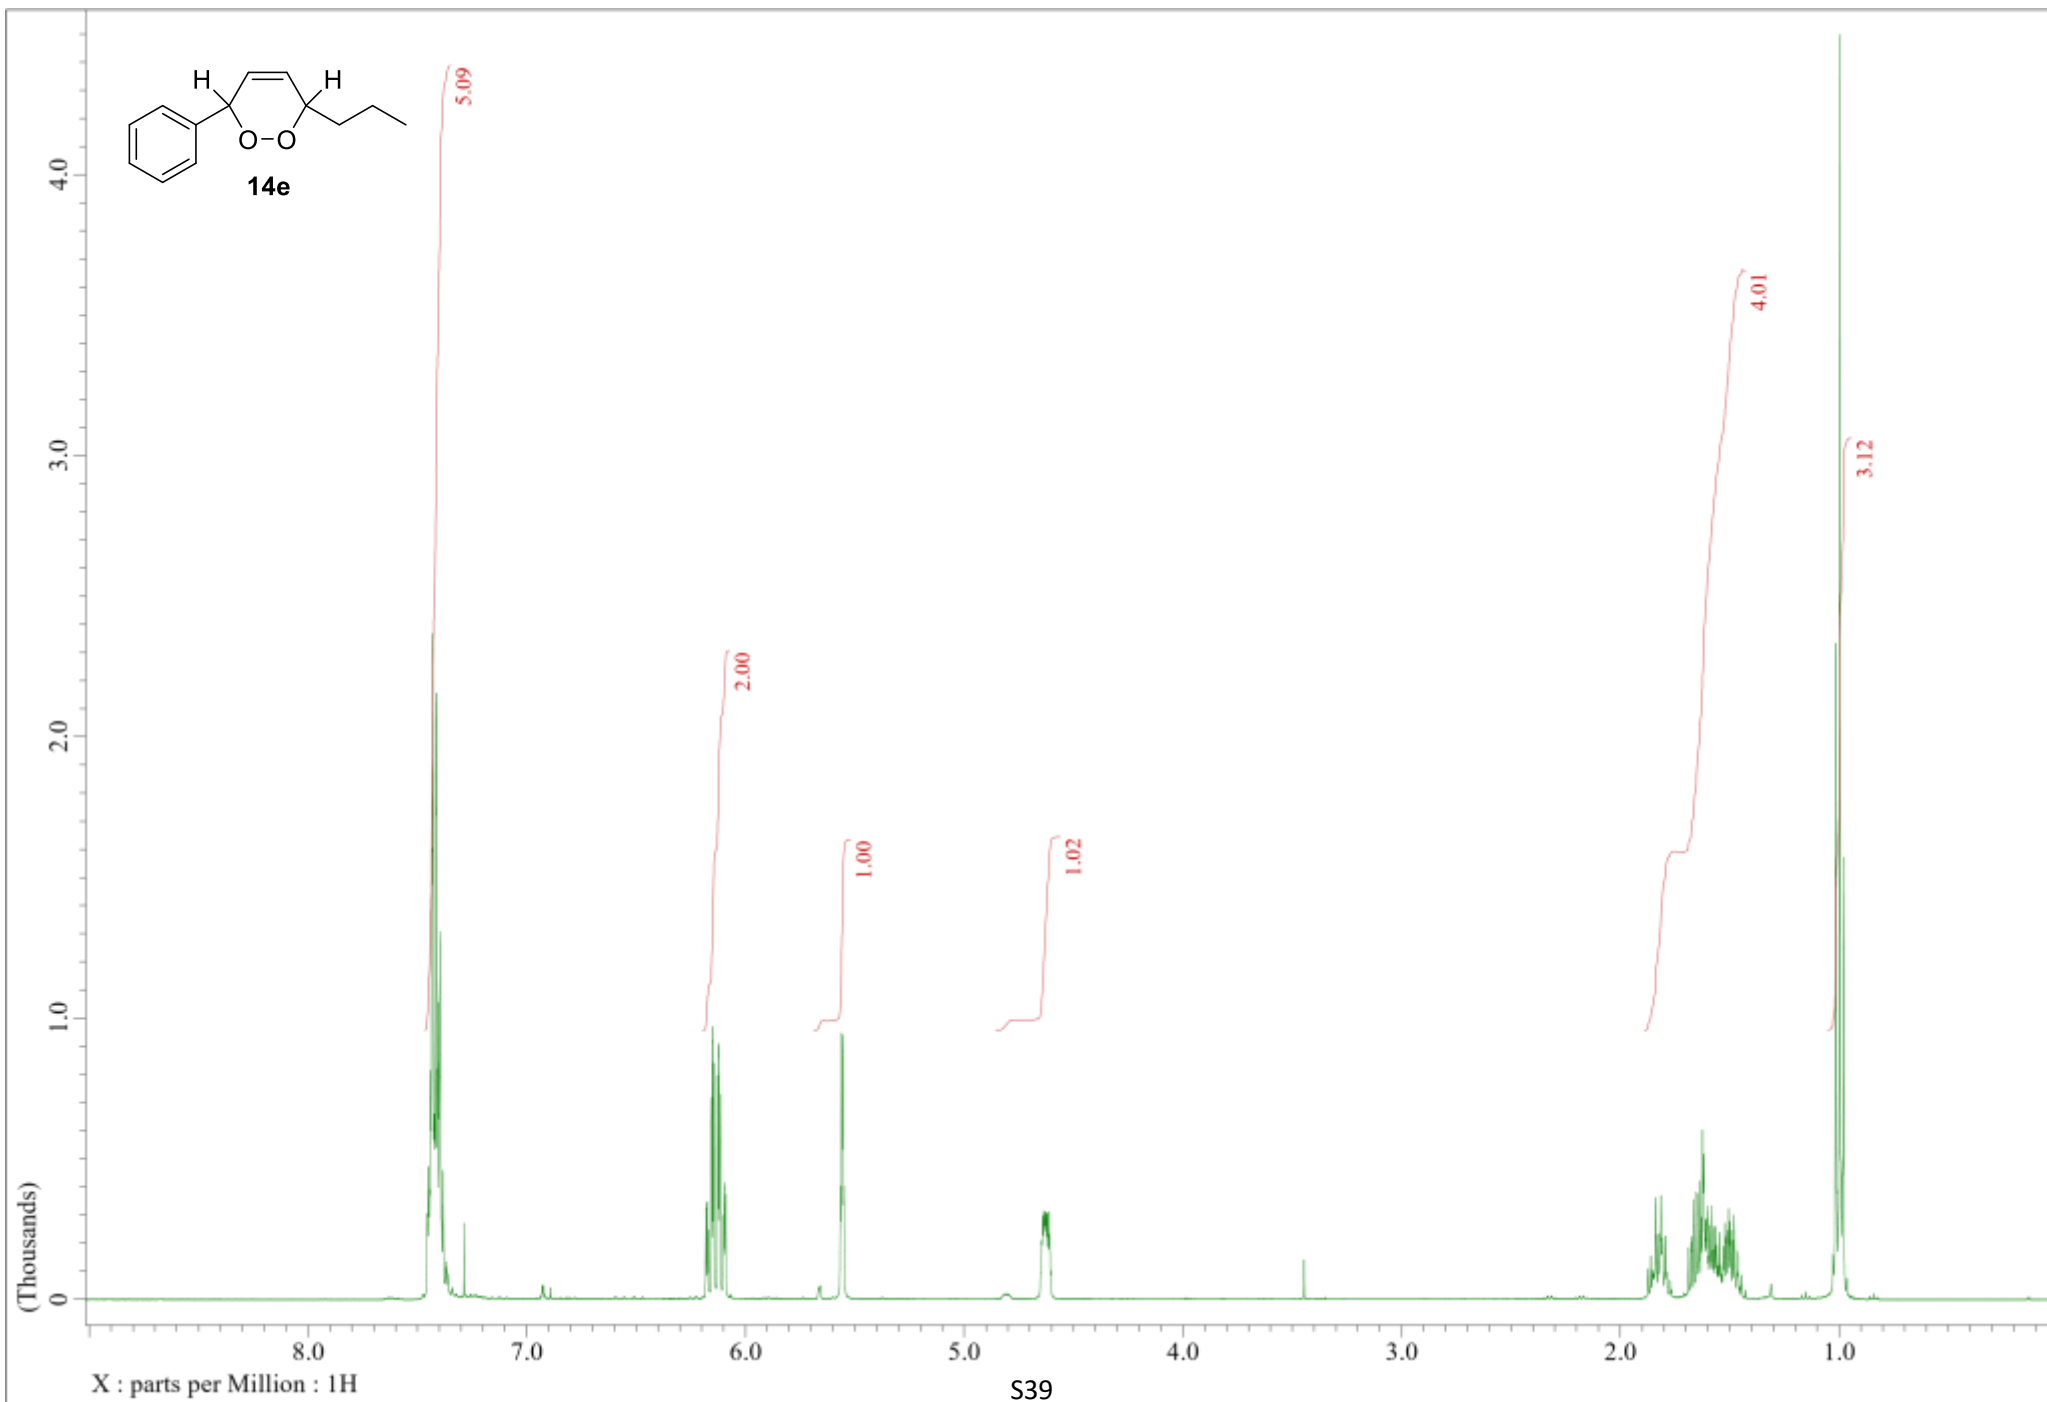

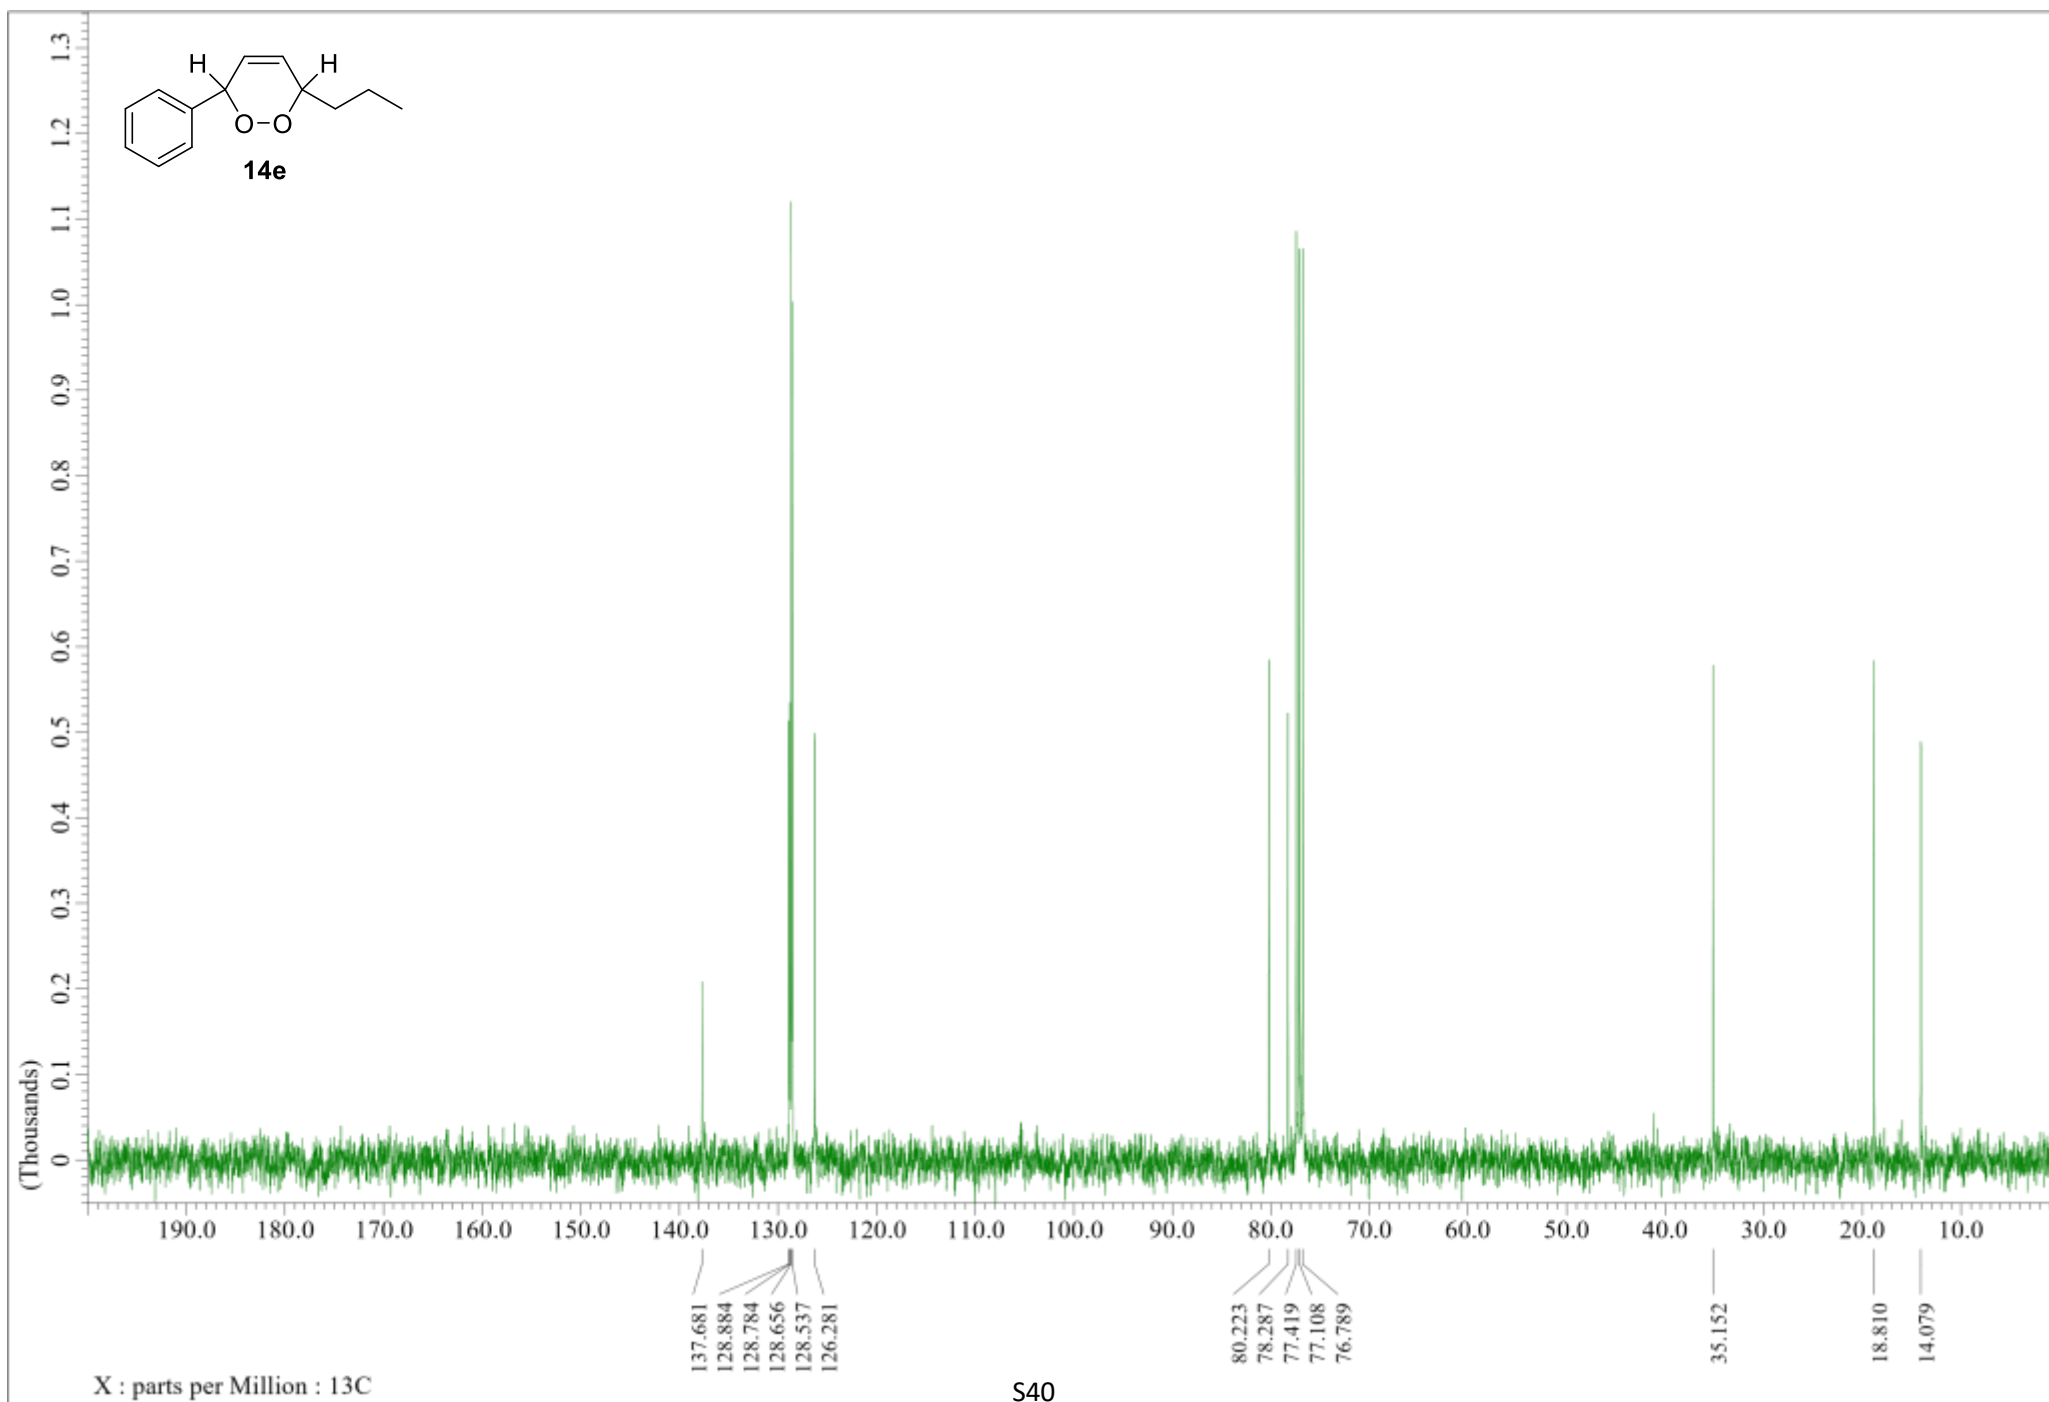



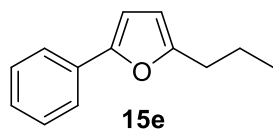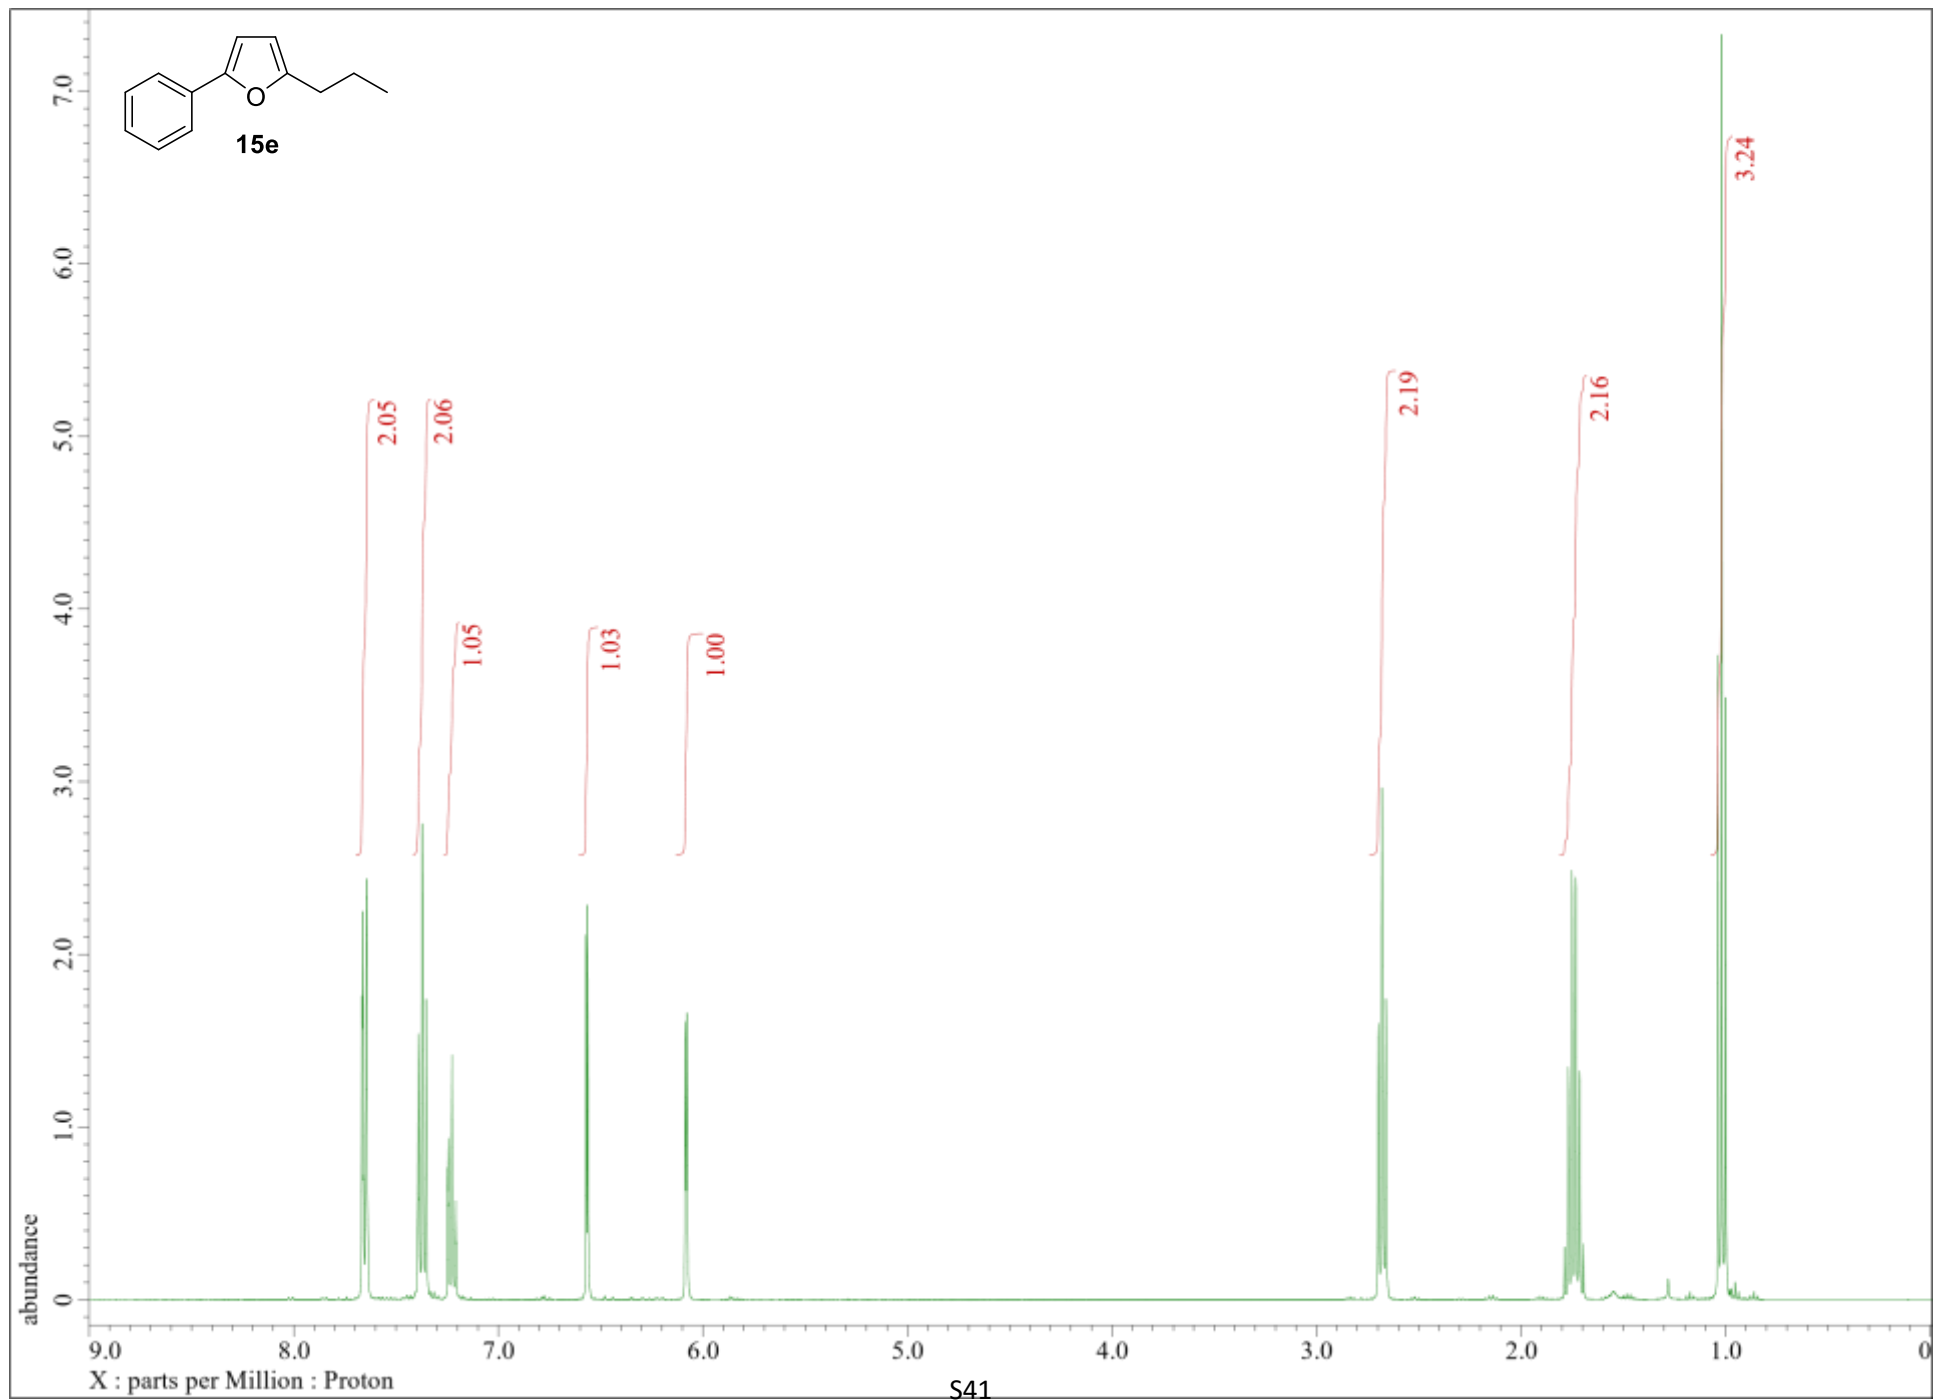

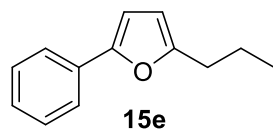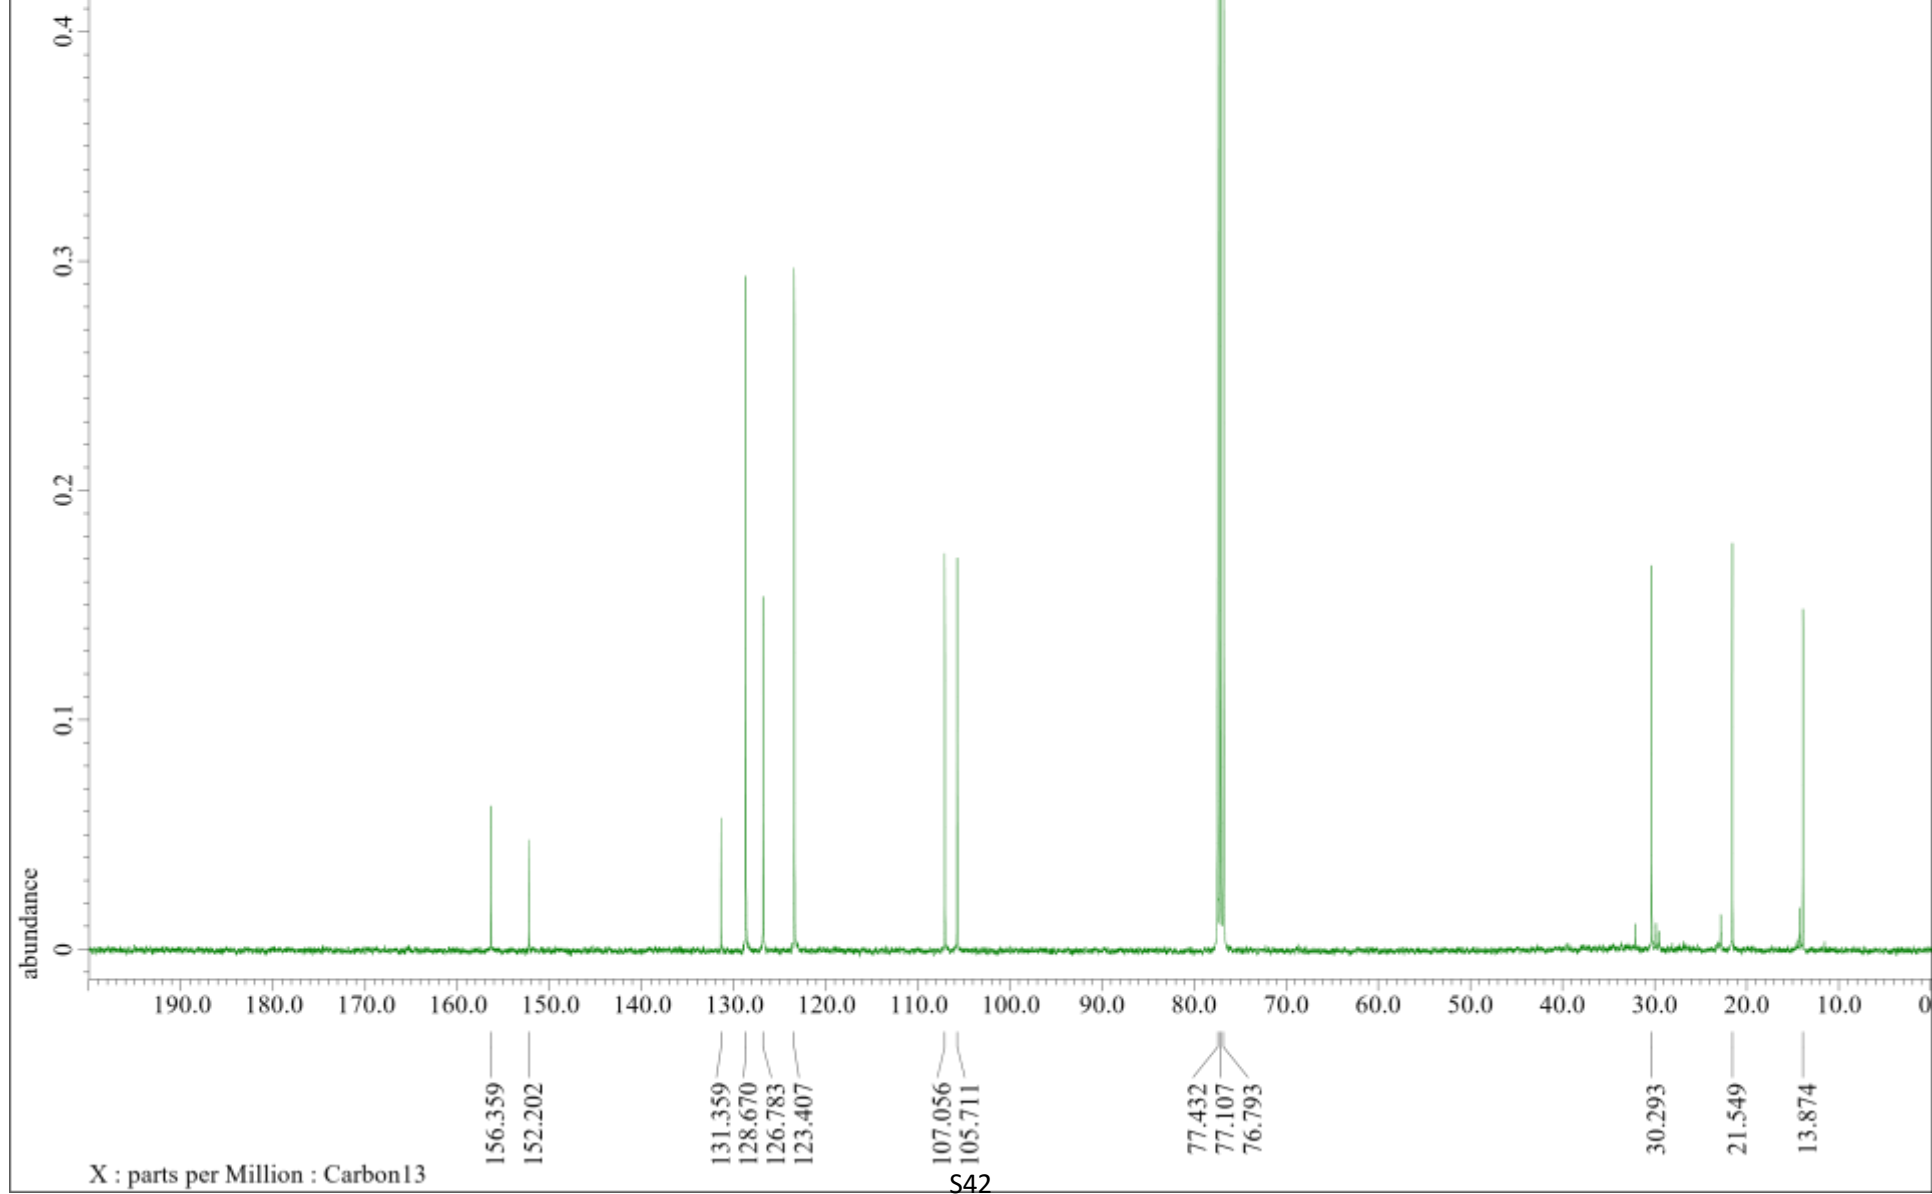

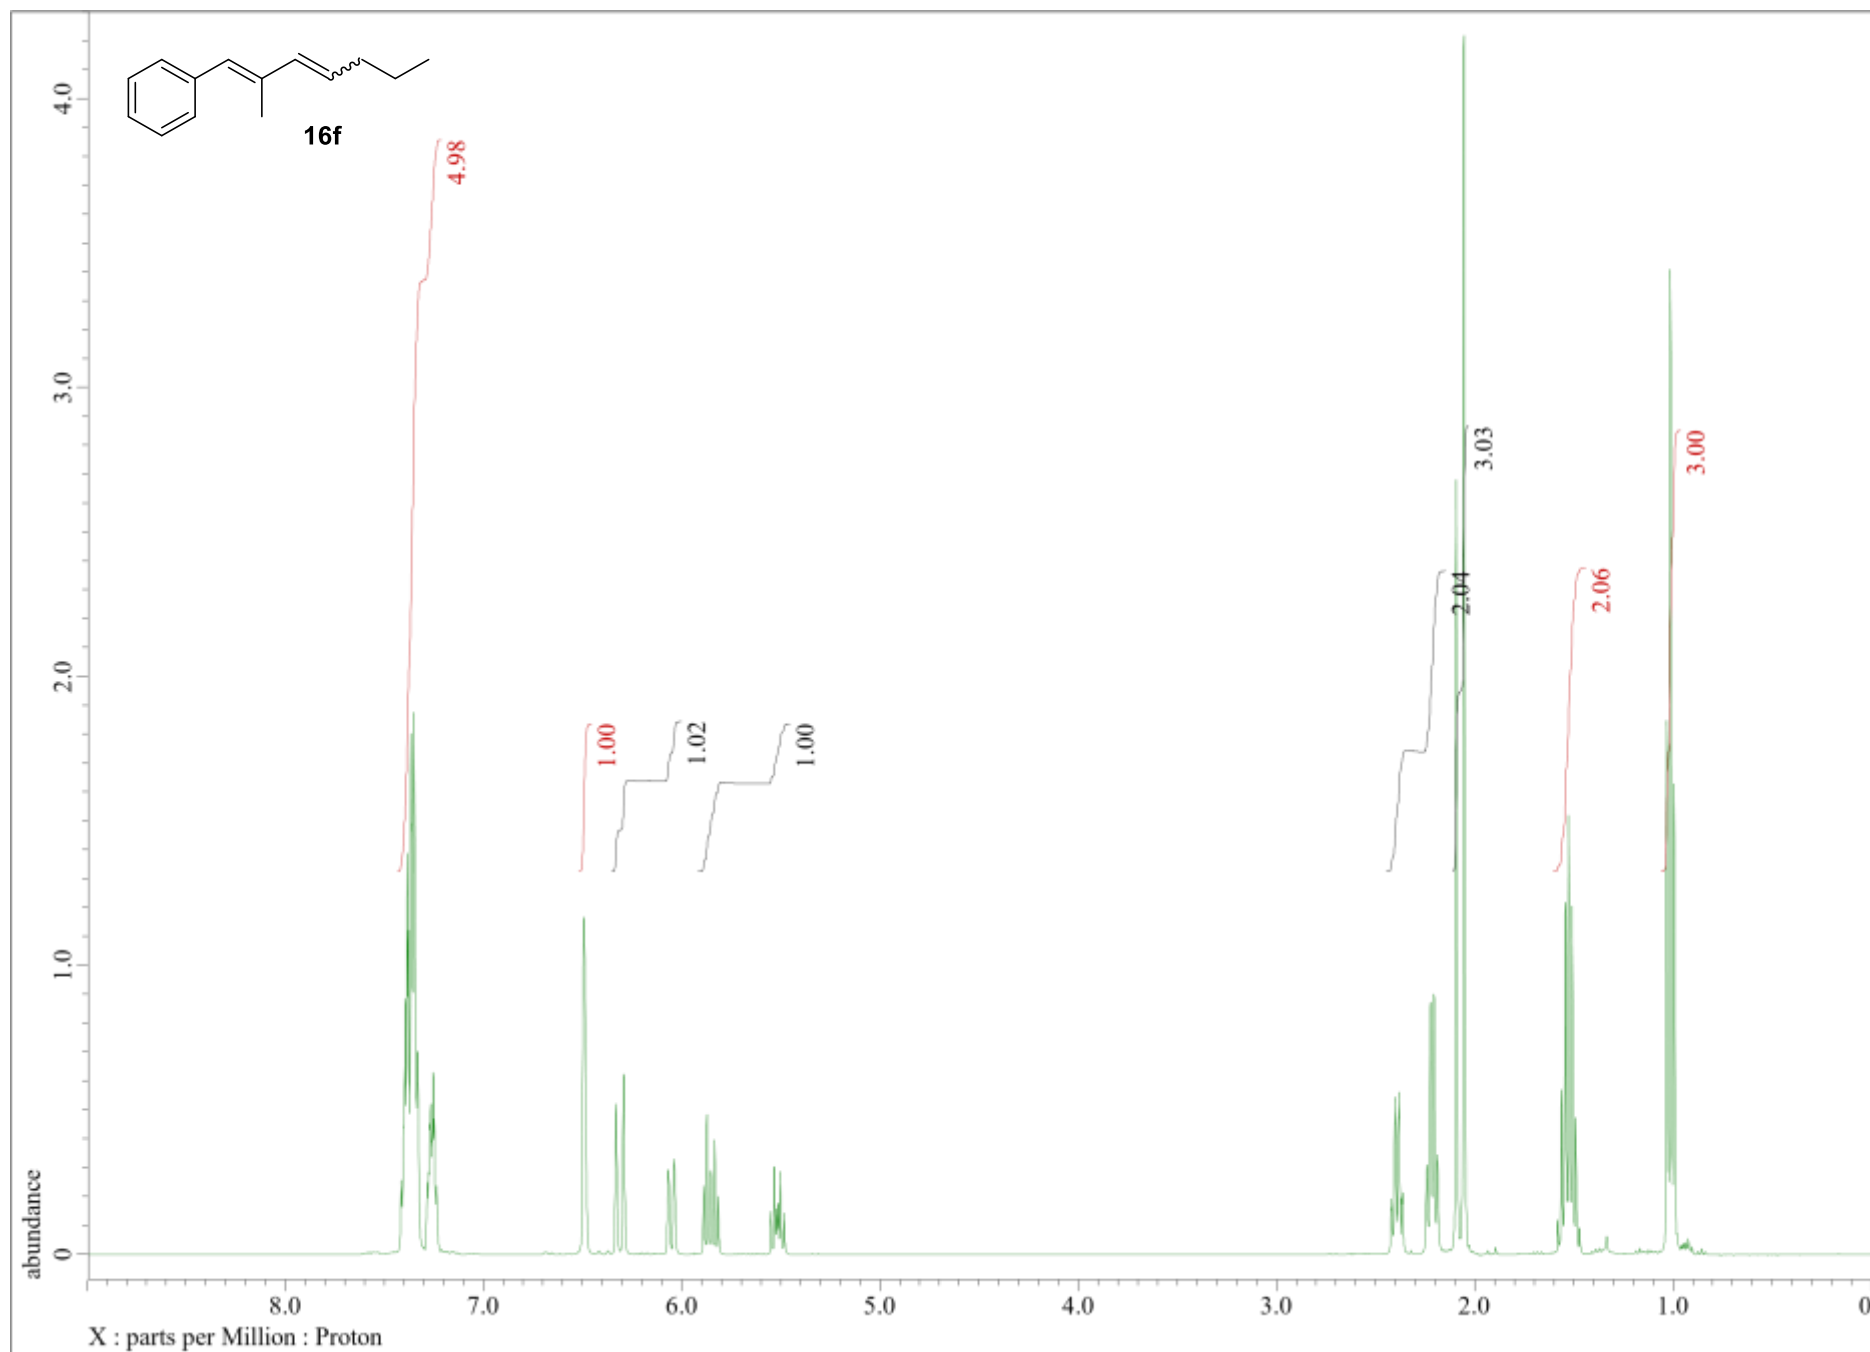

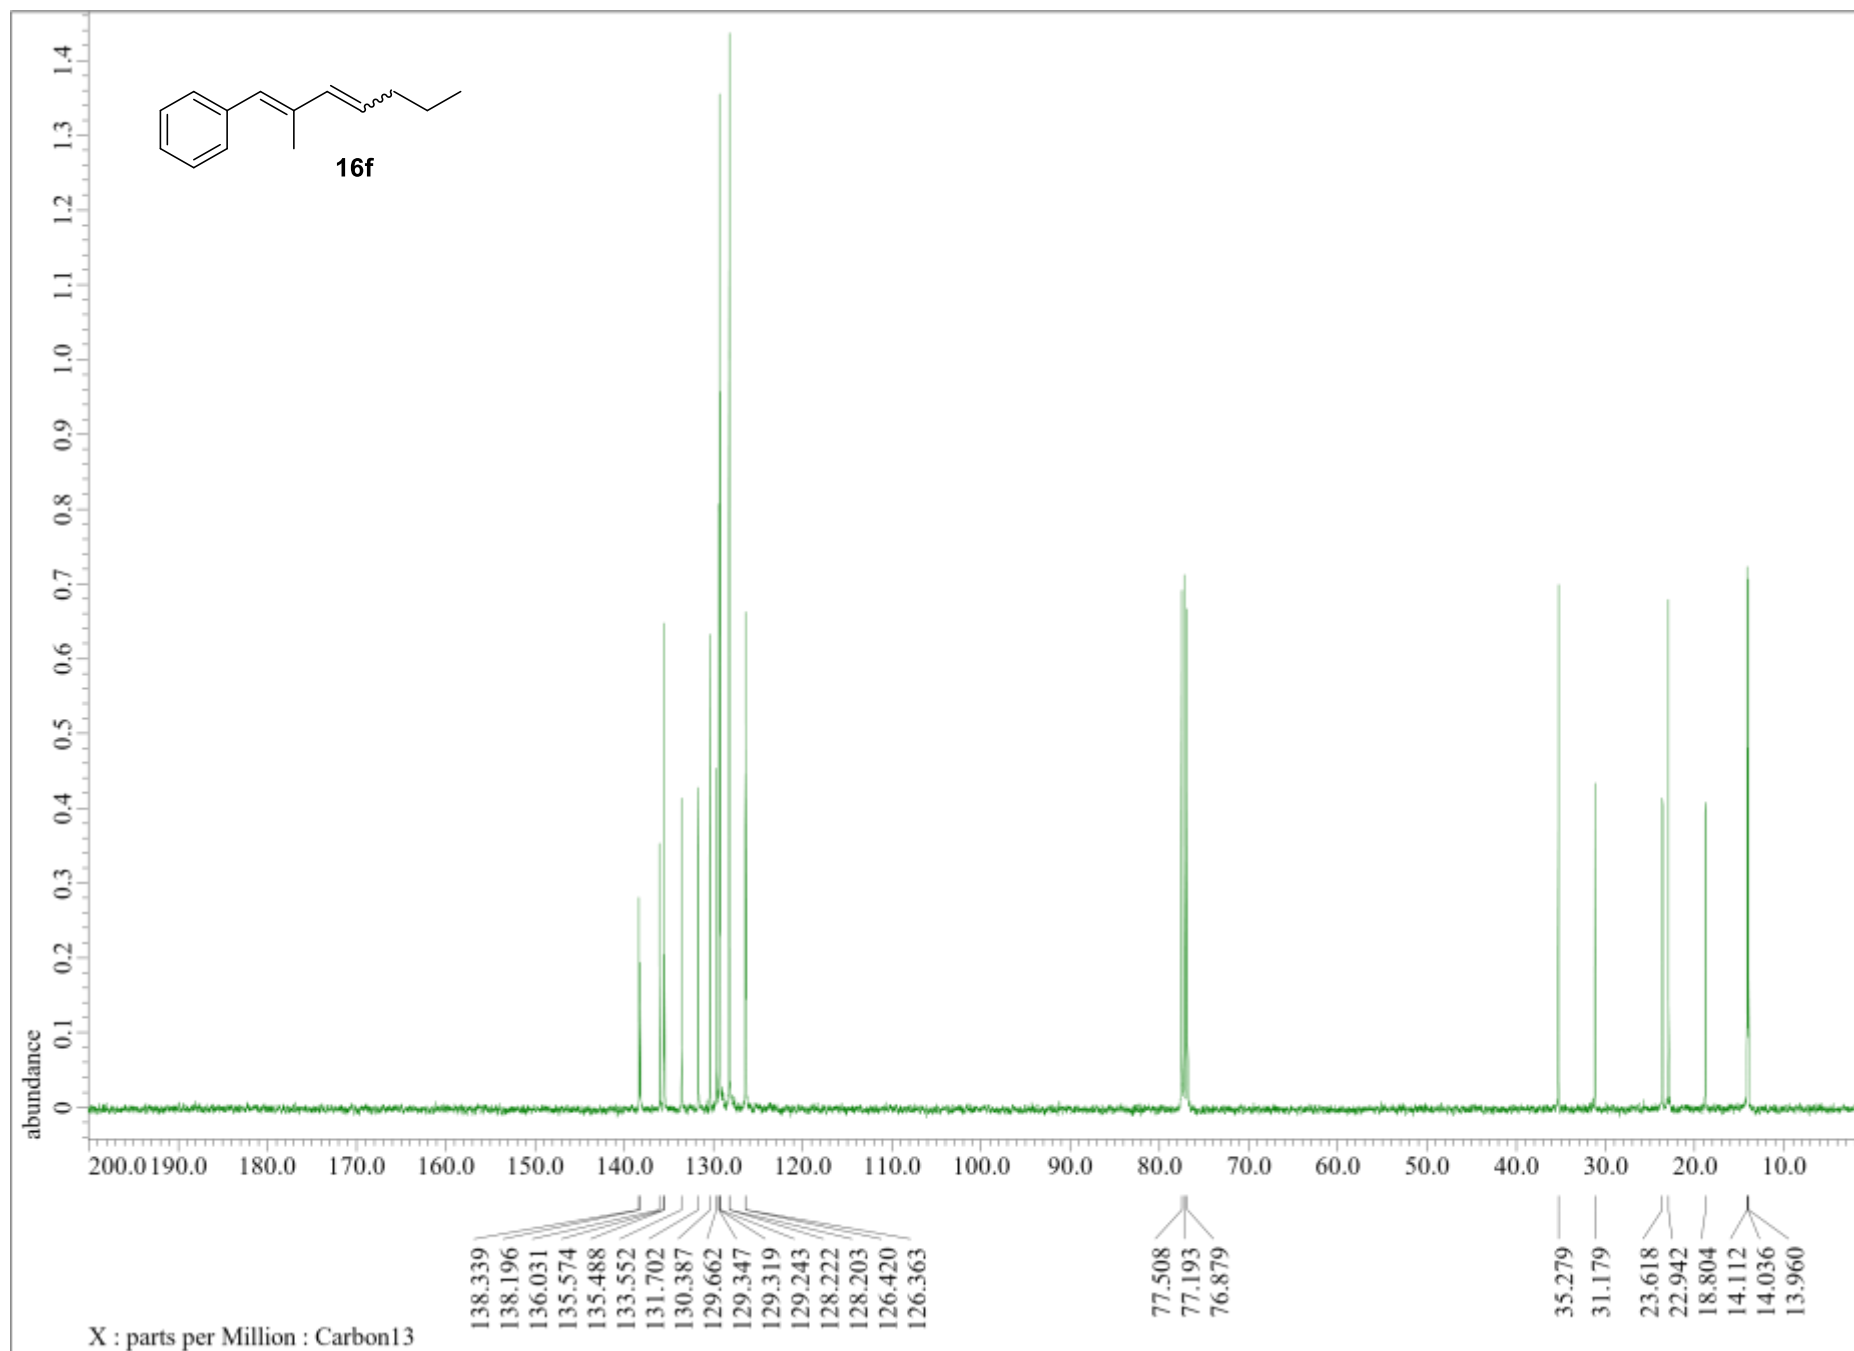

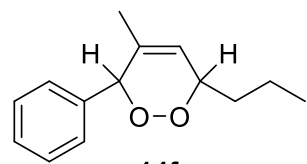

**14f**

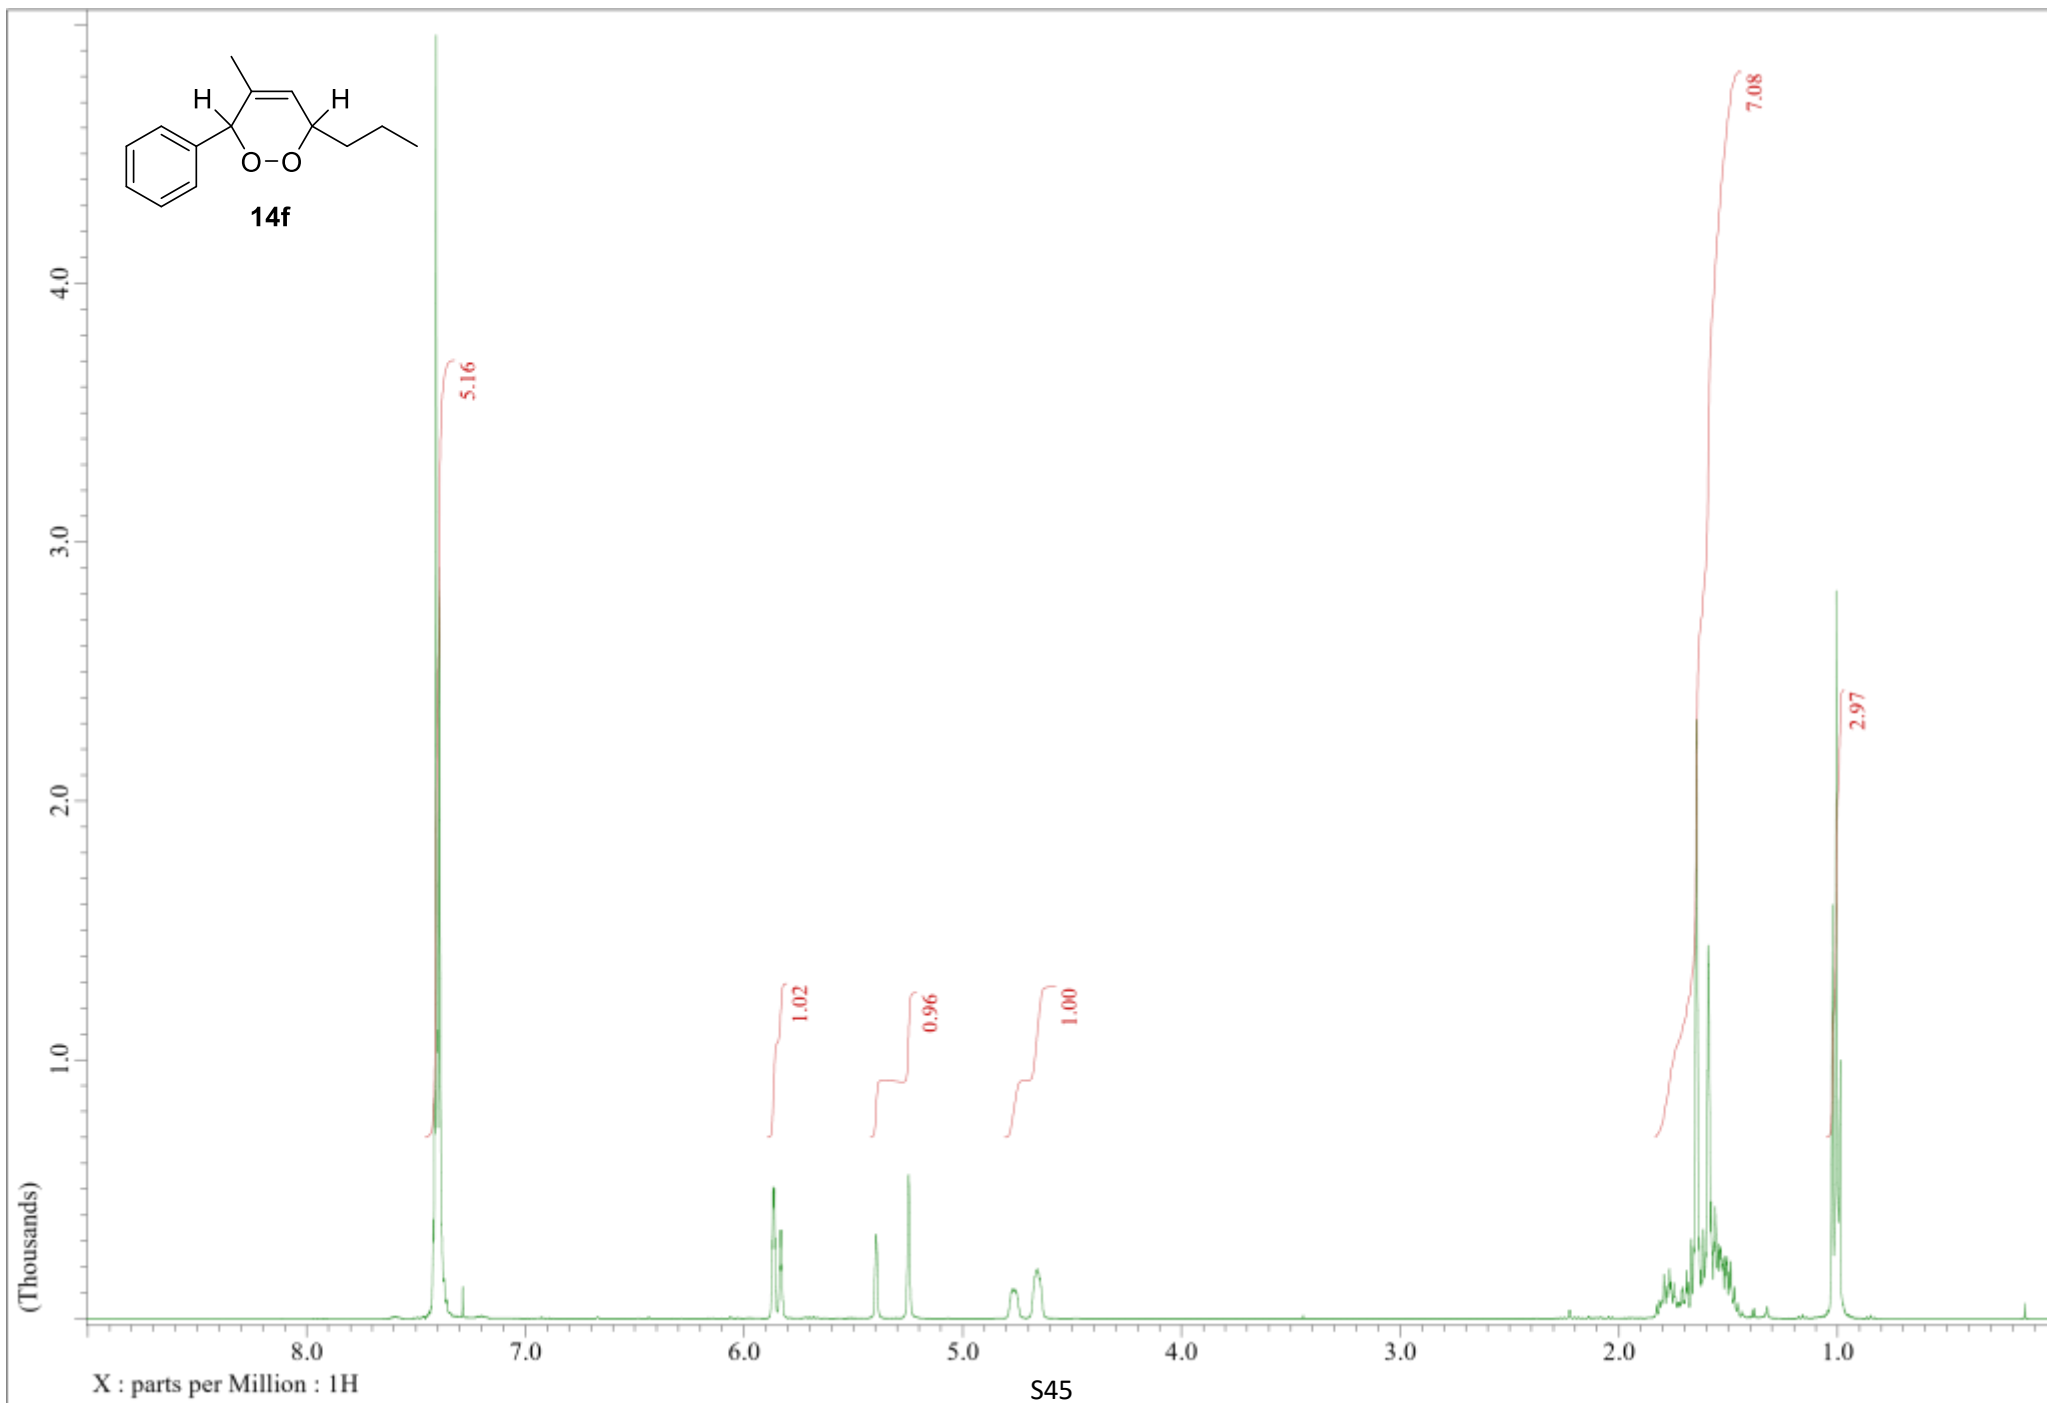

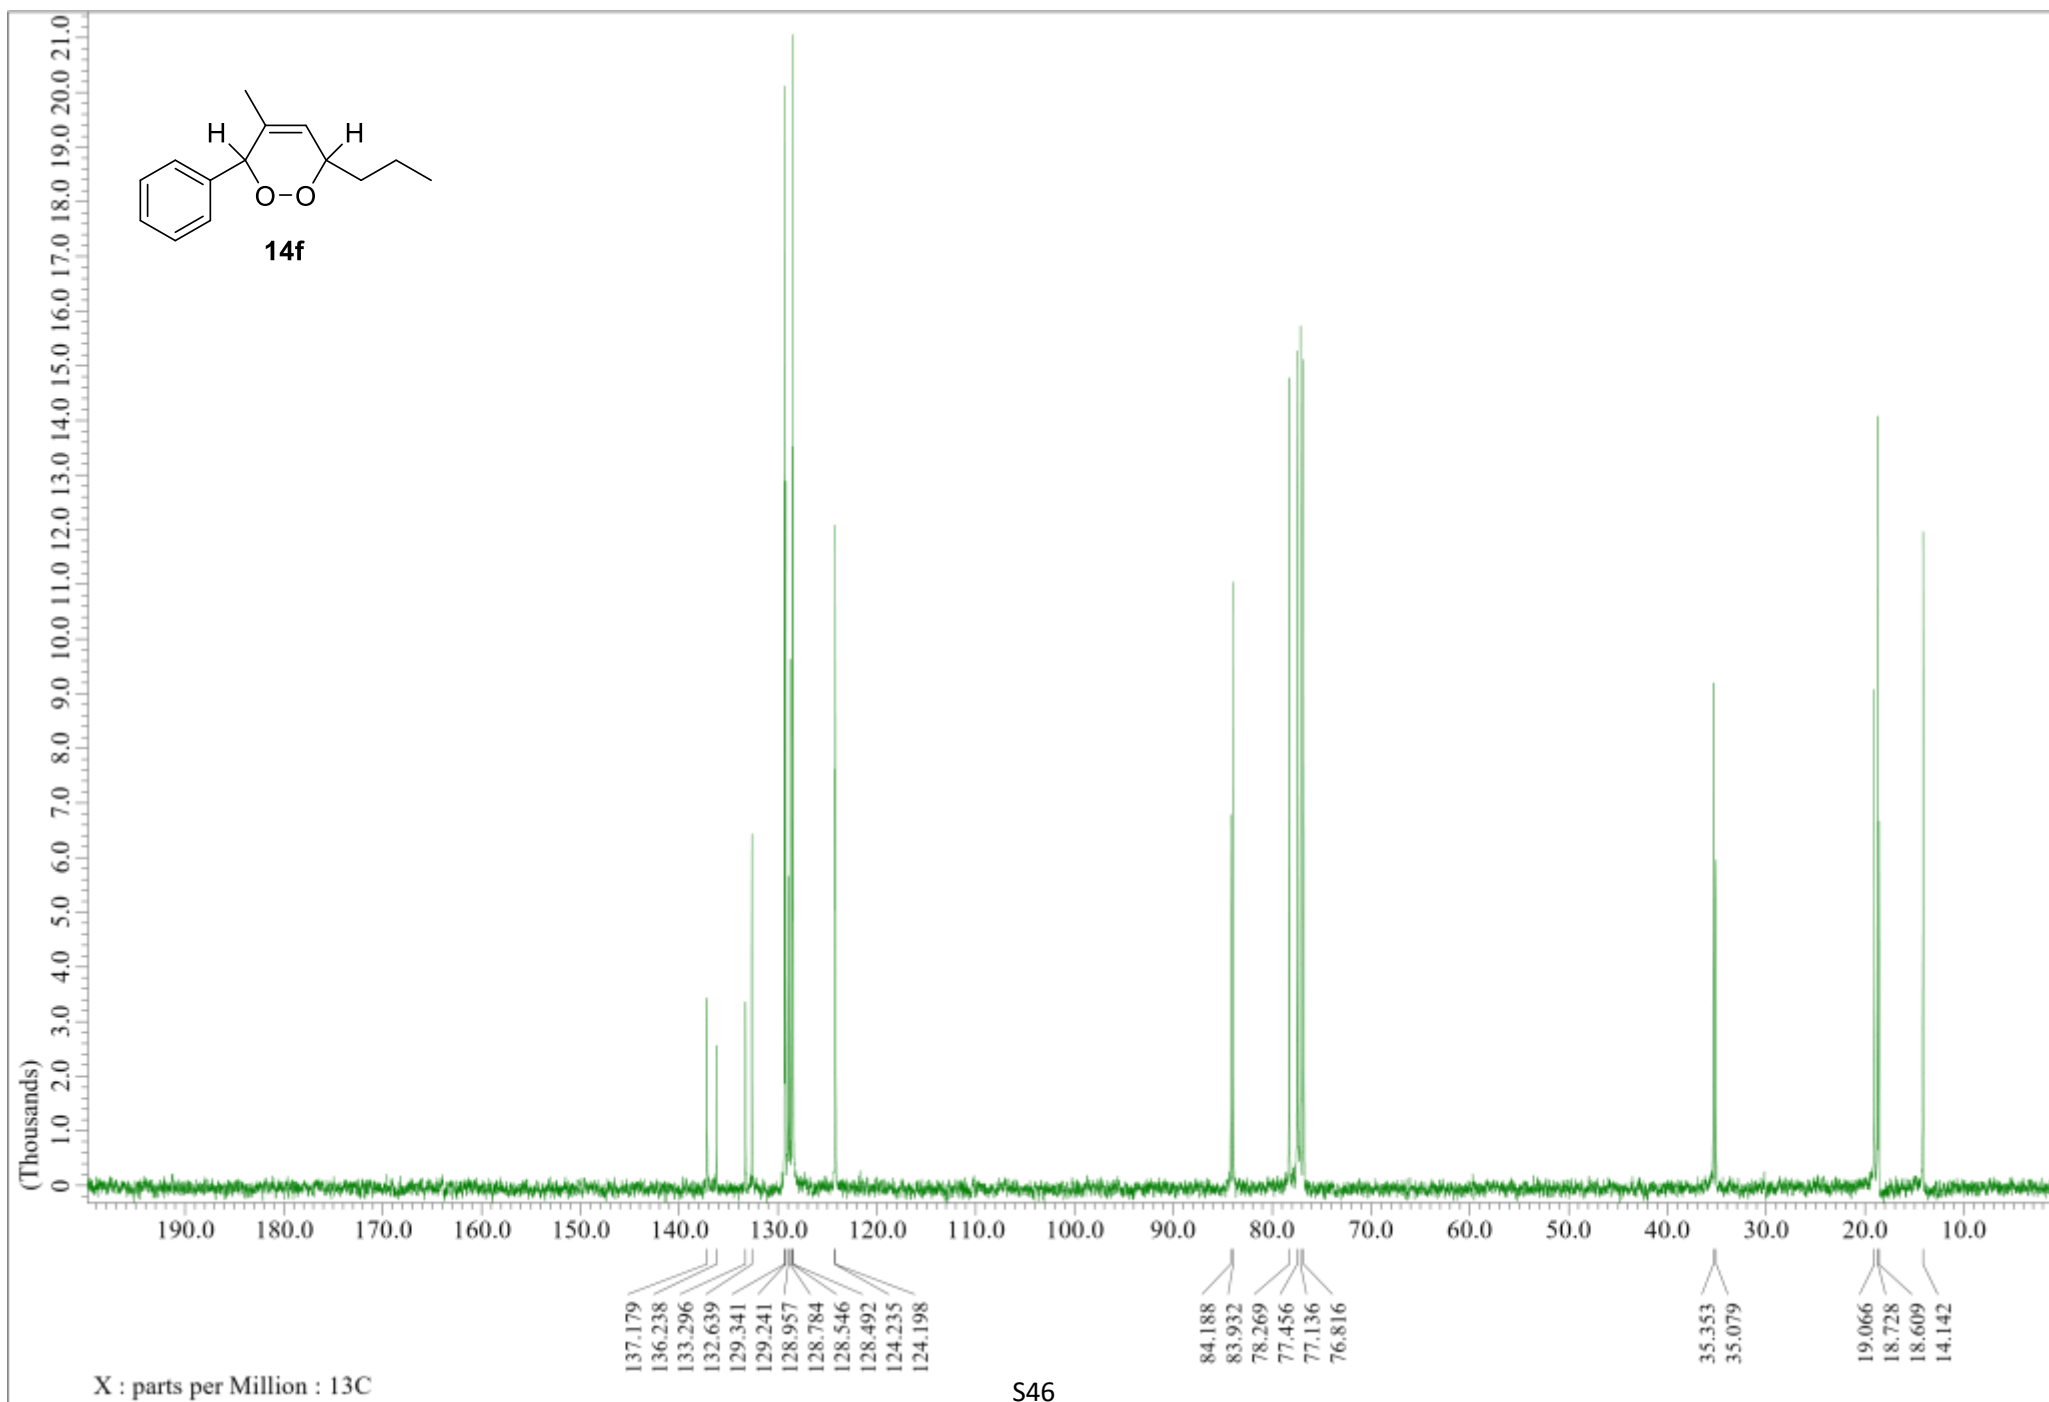

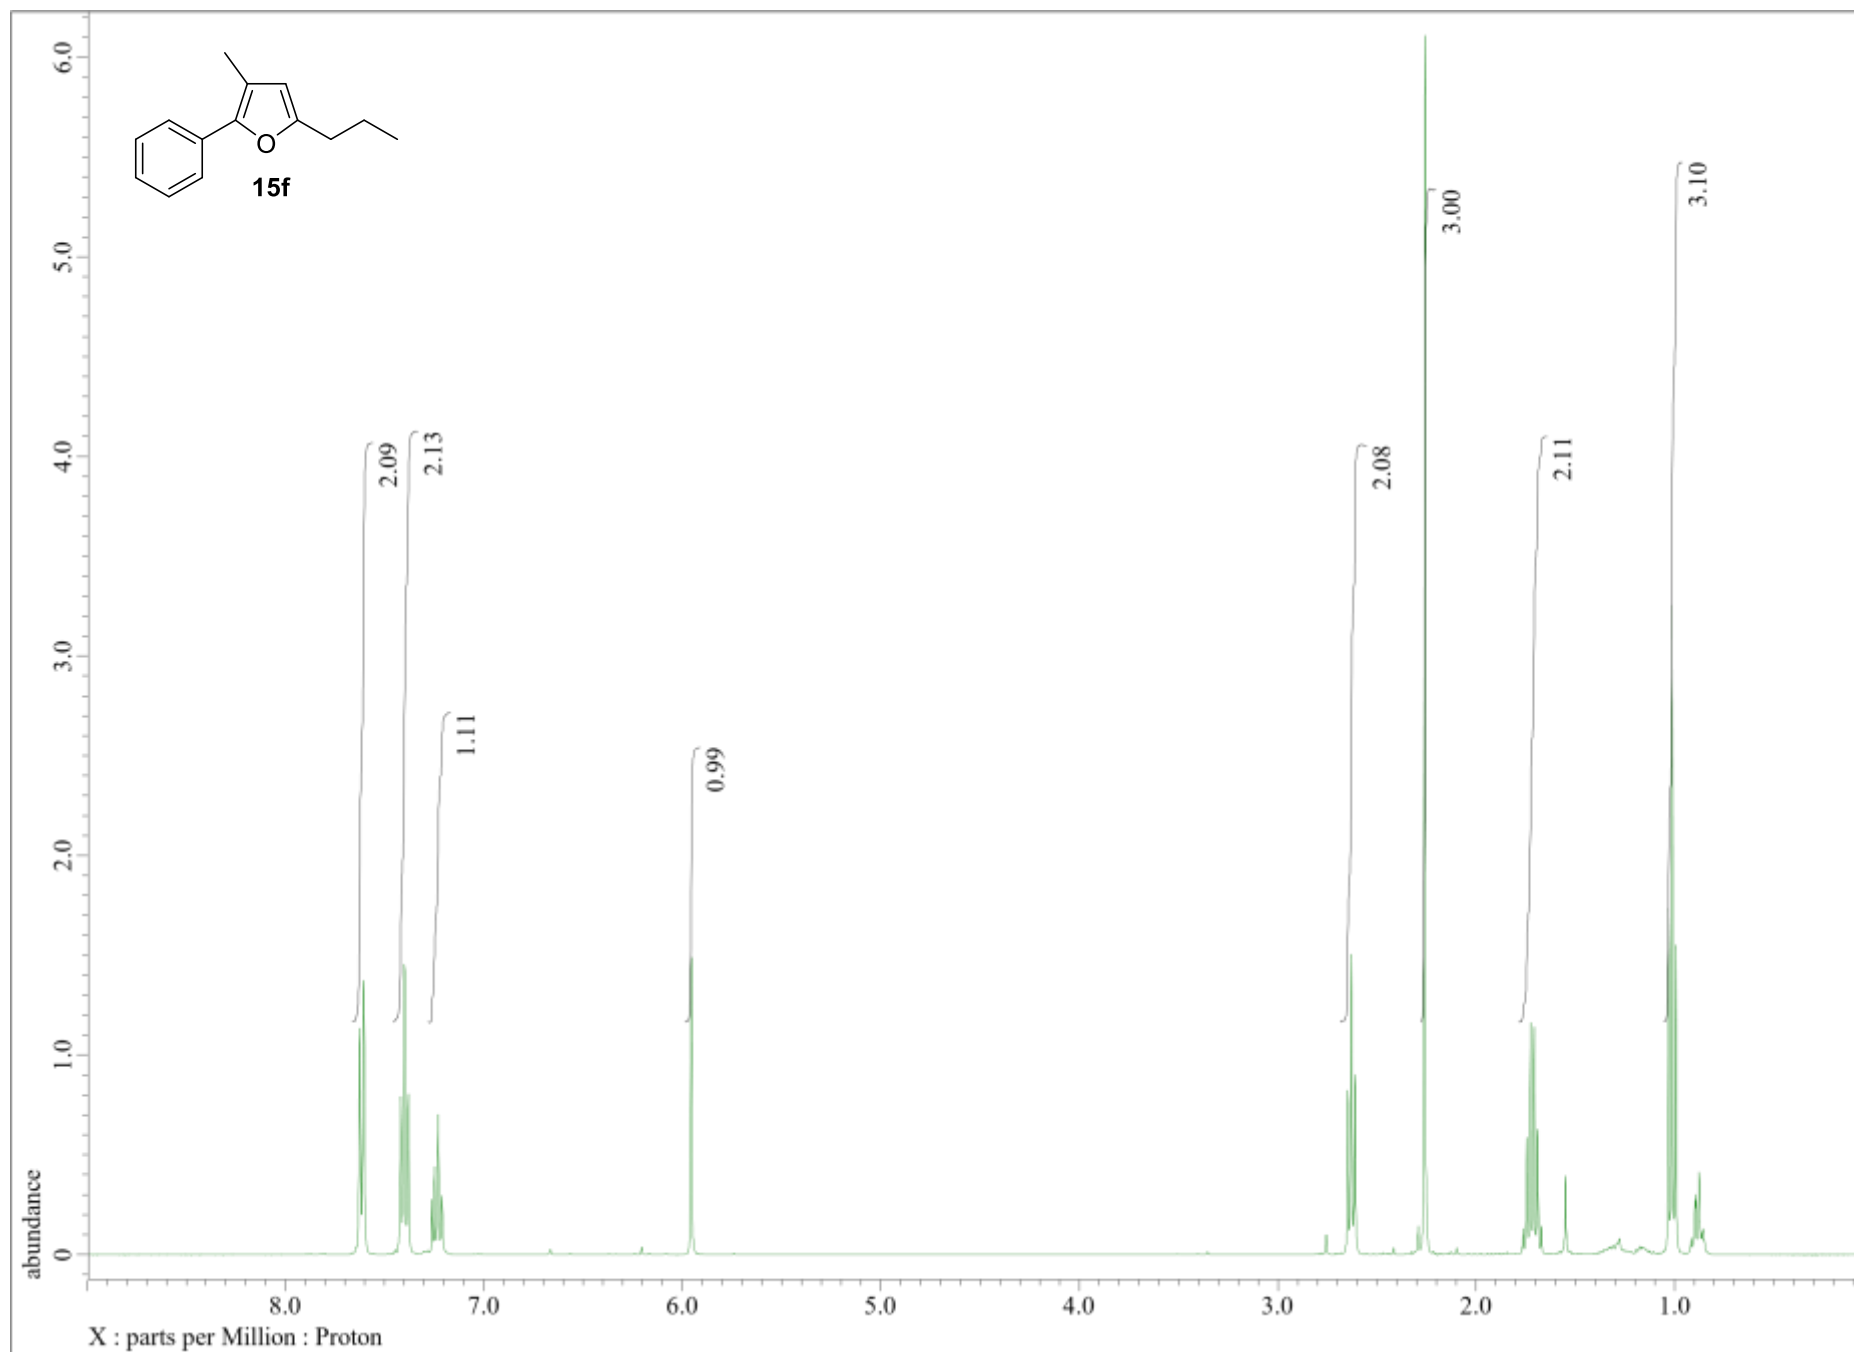

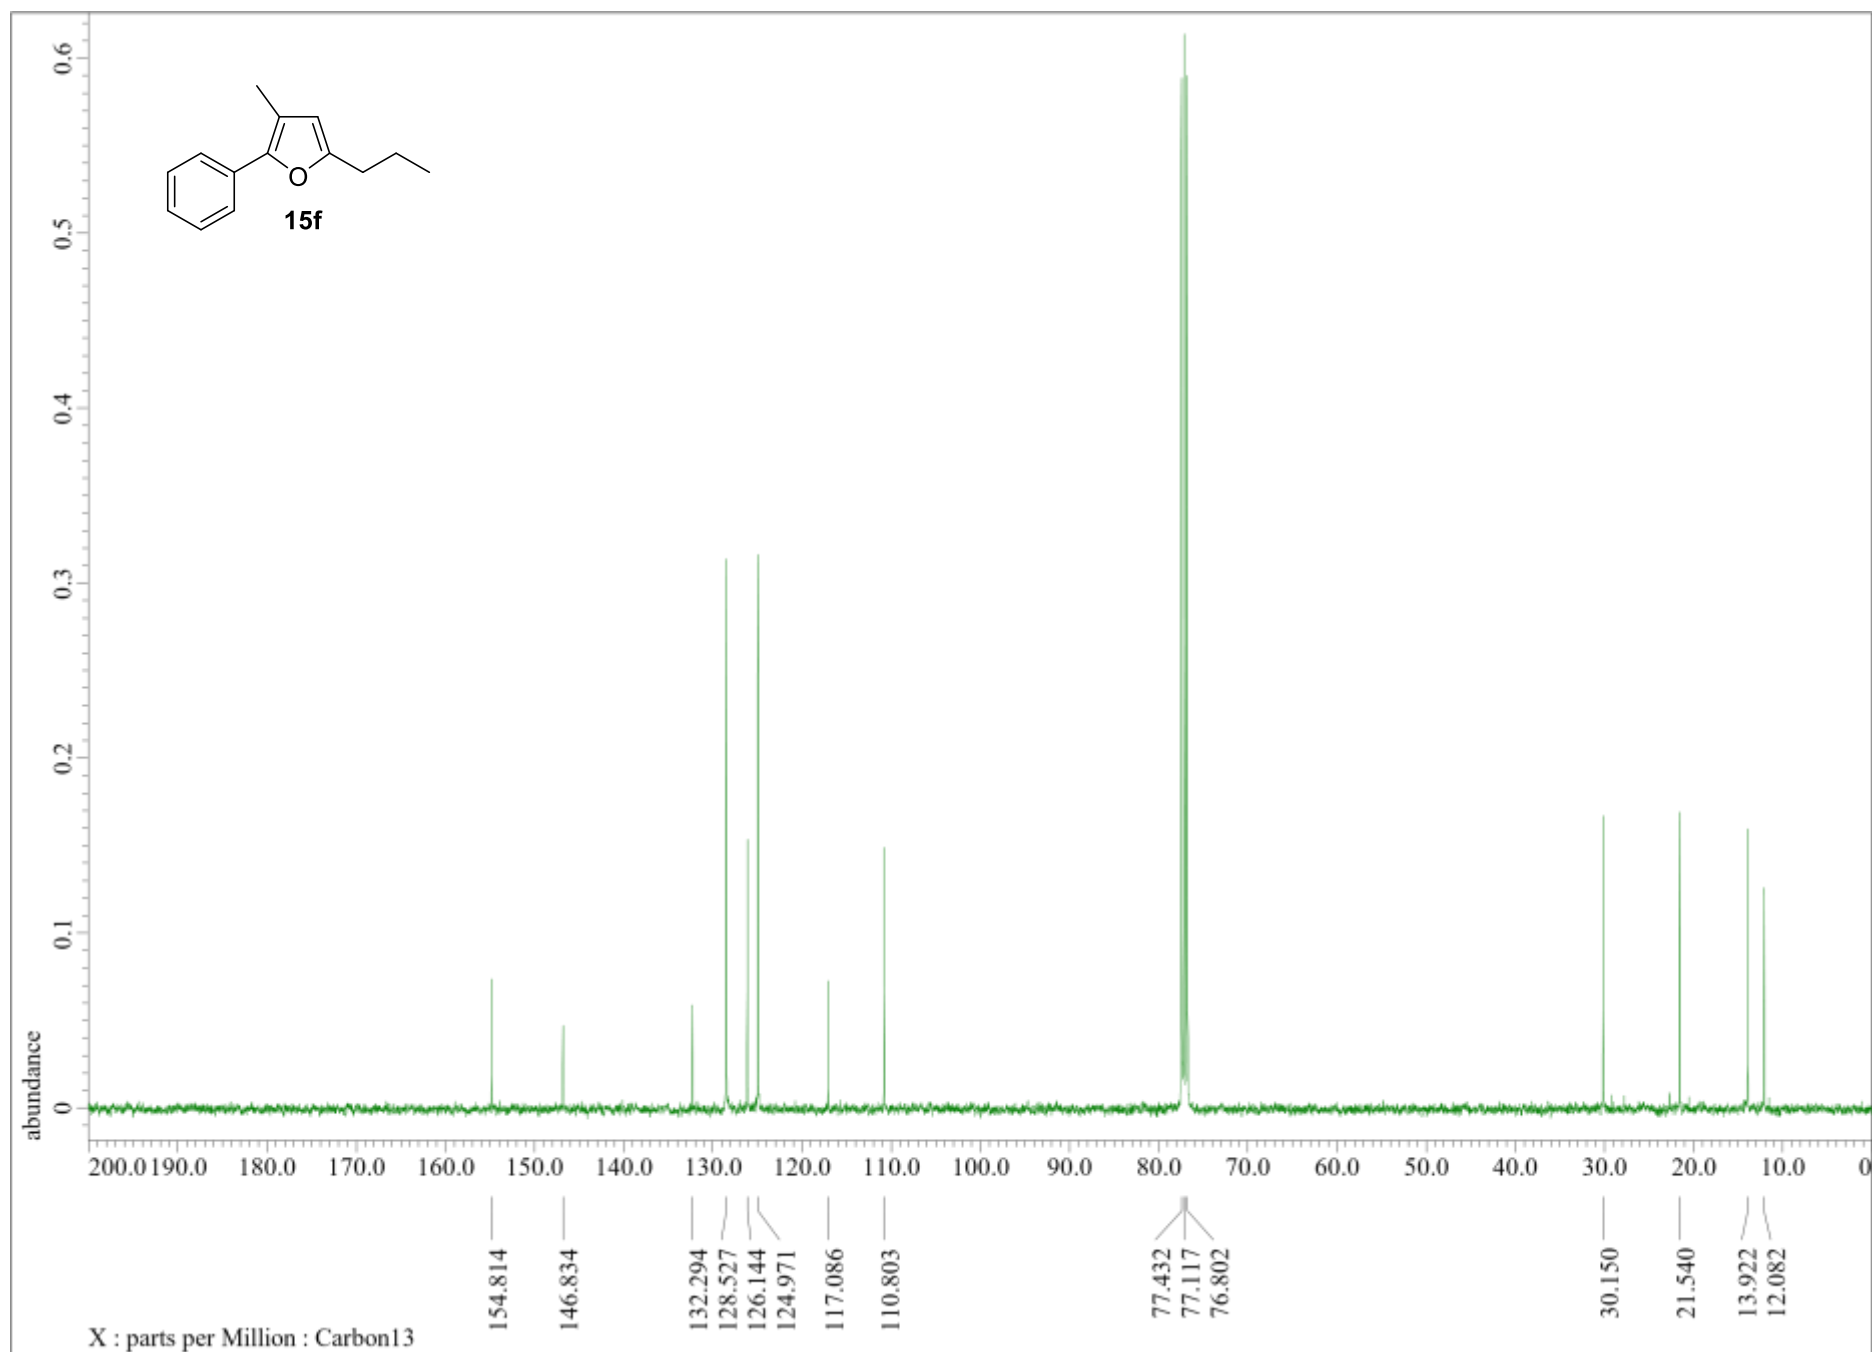



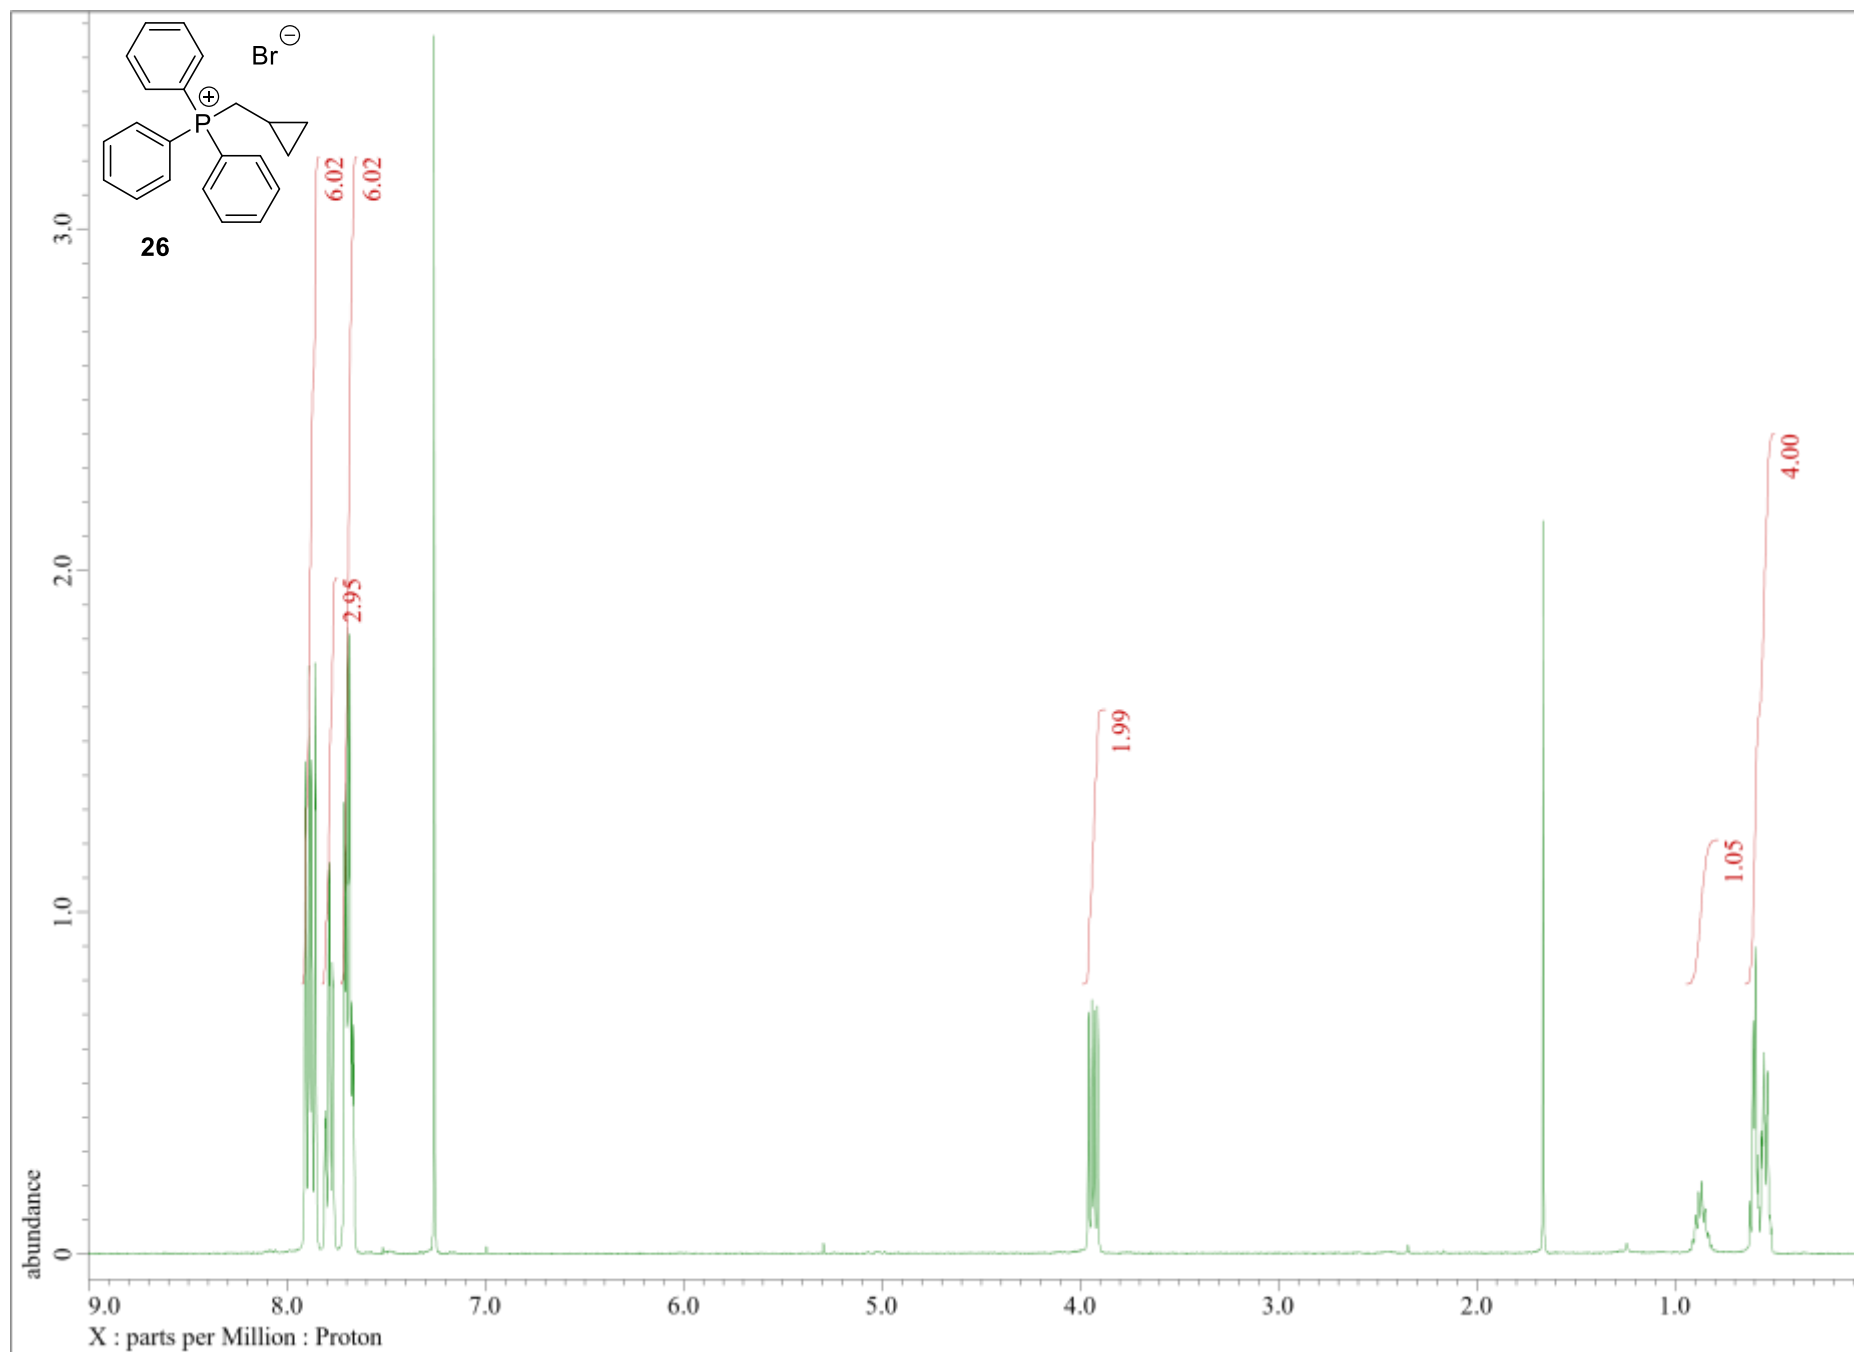

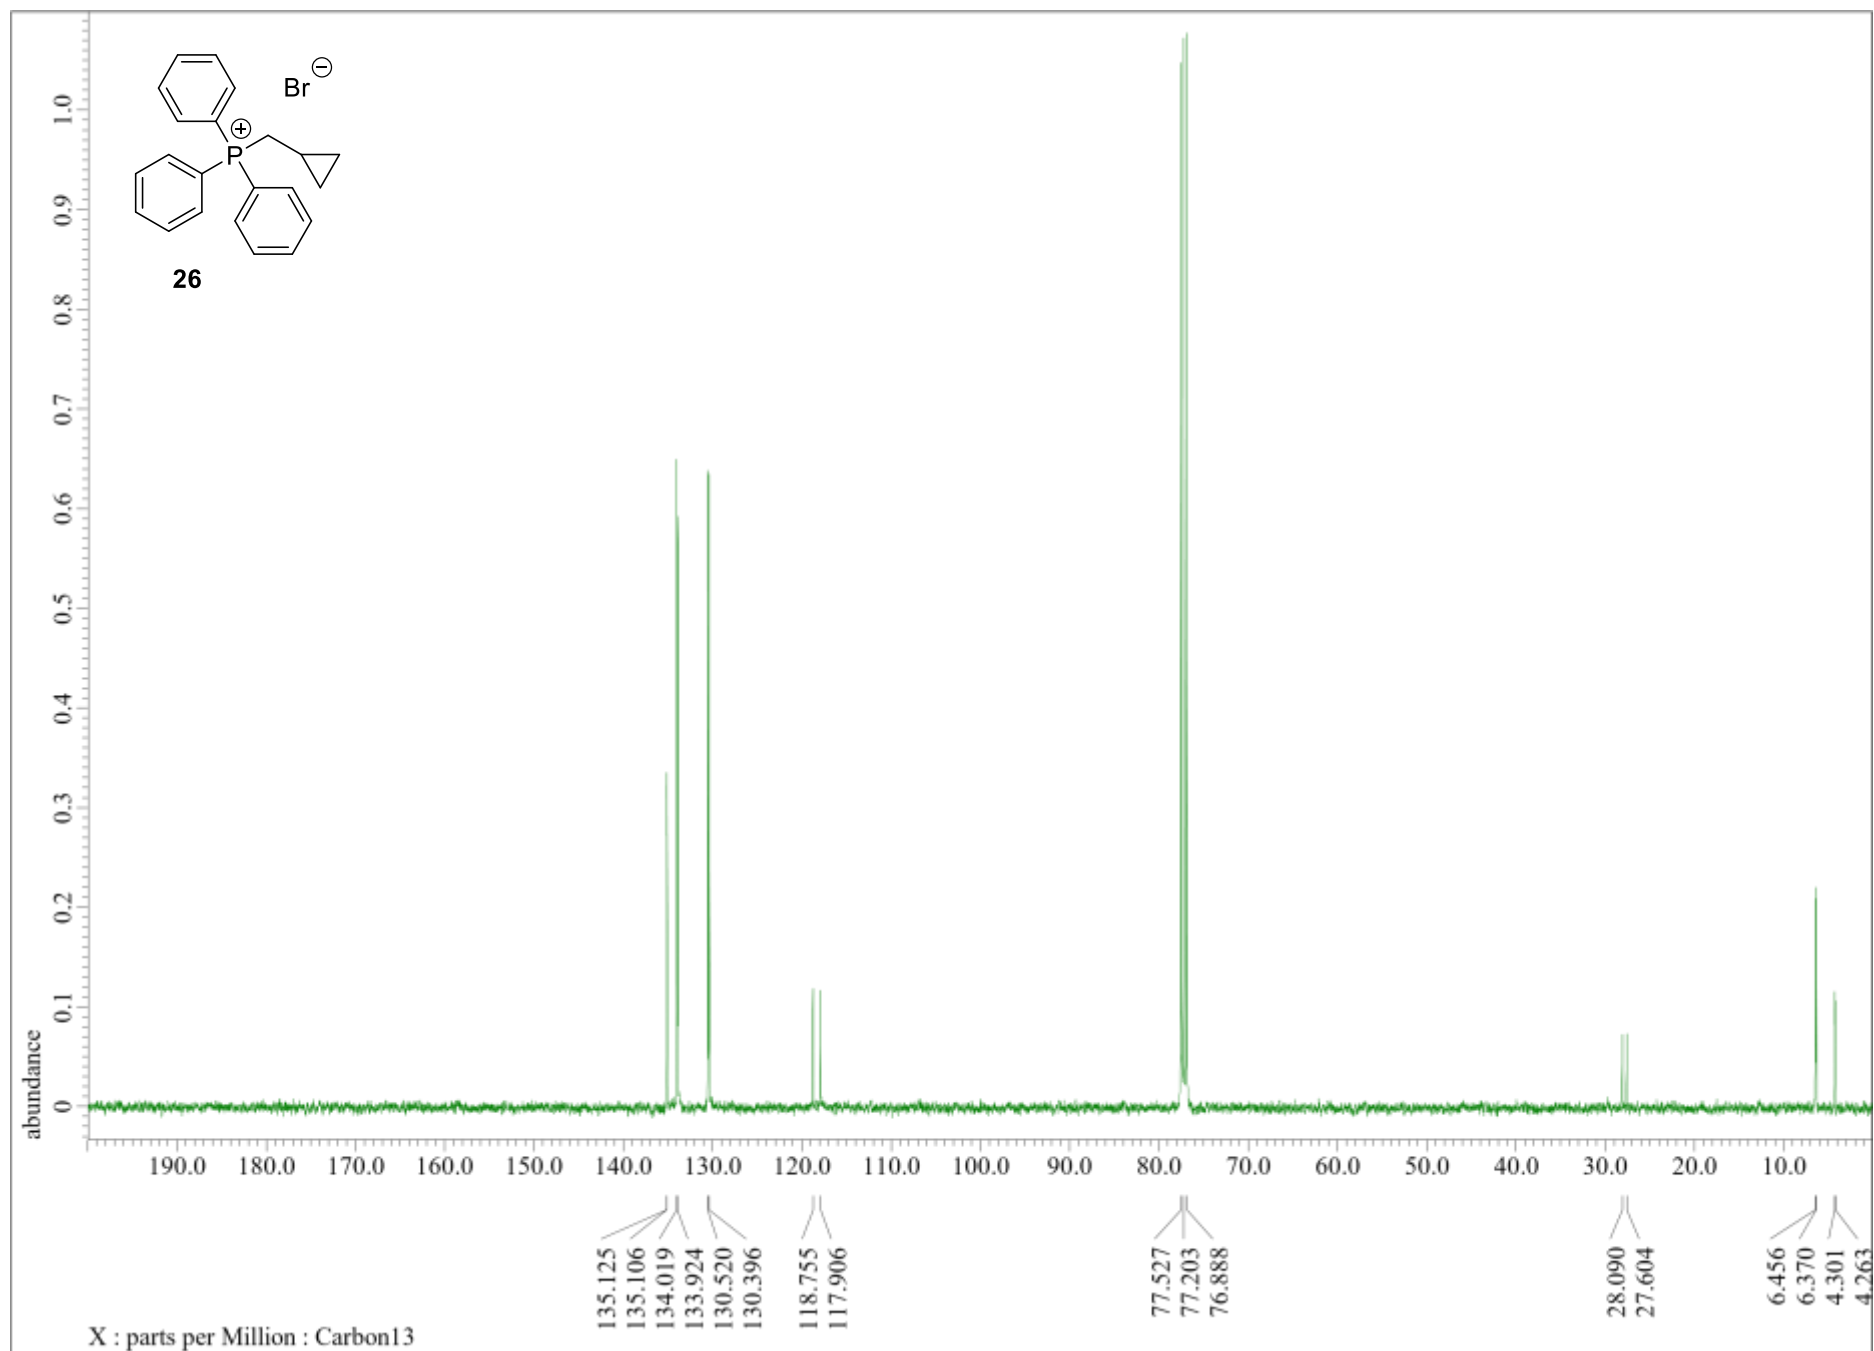

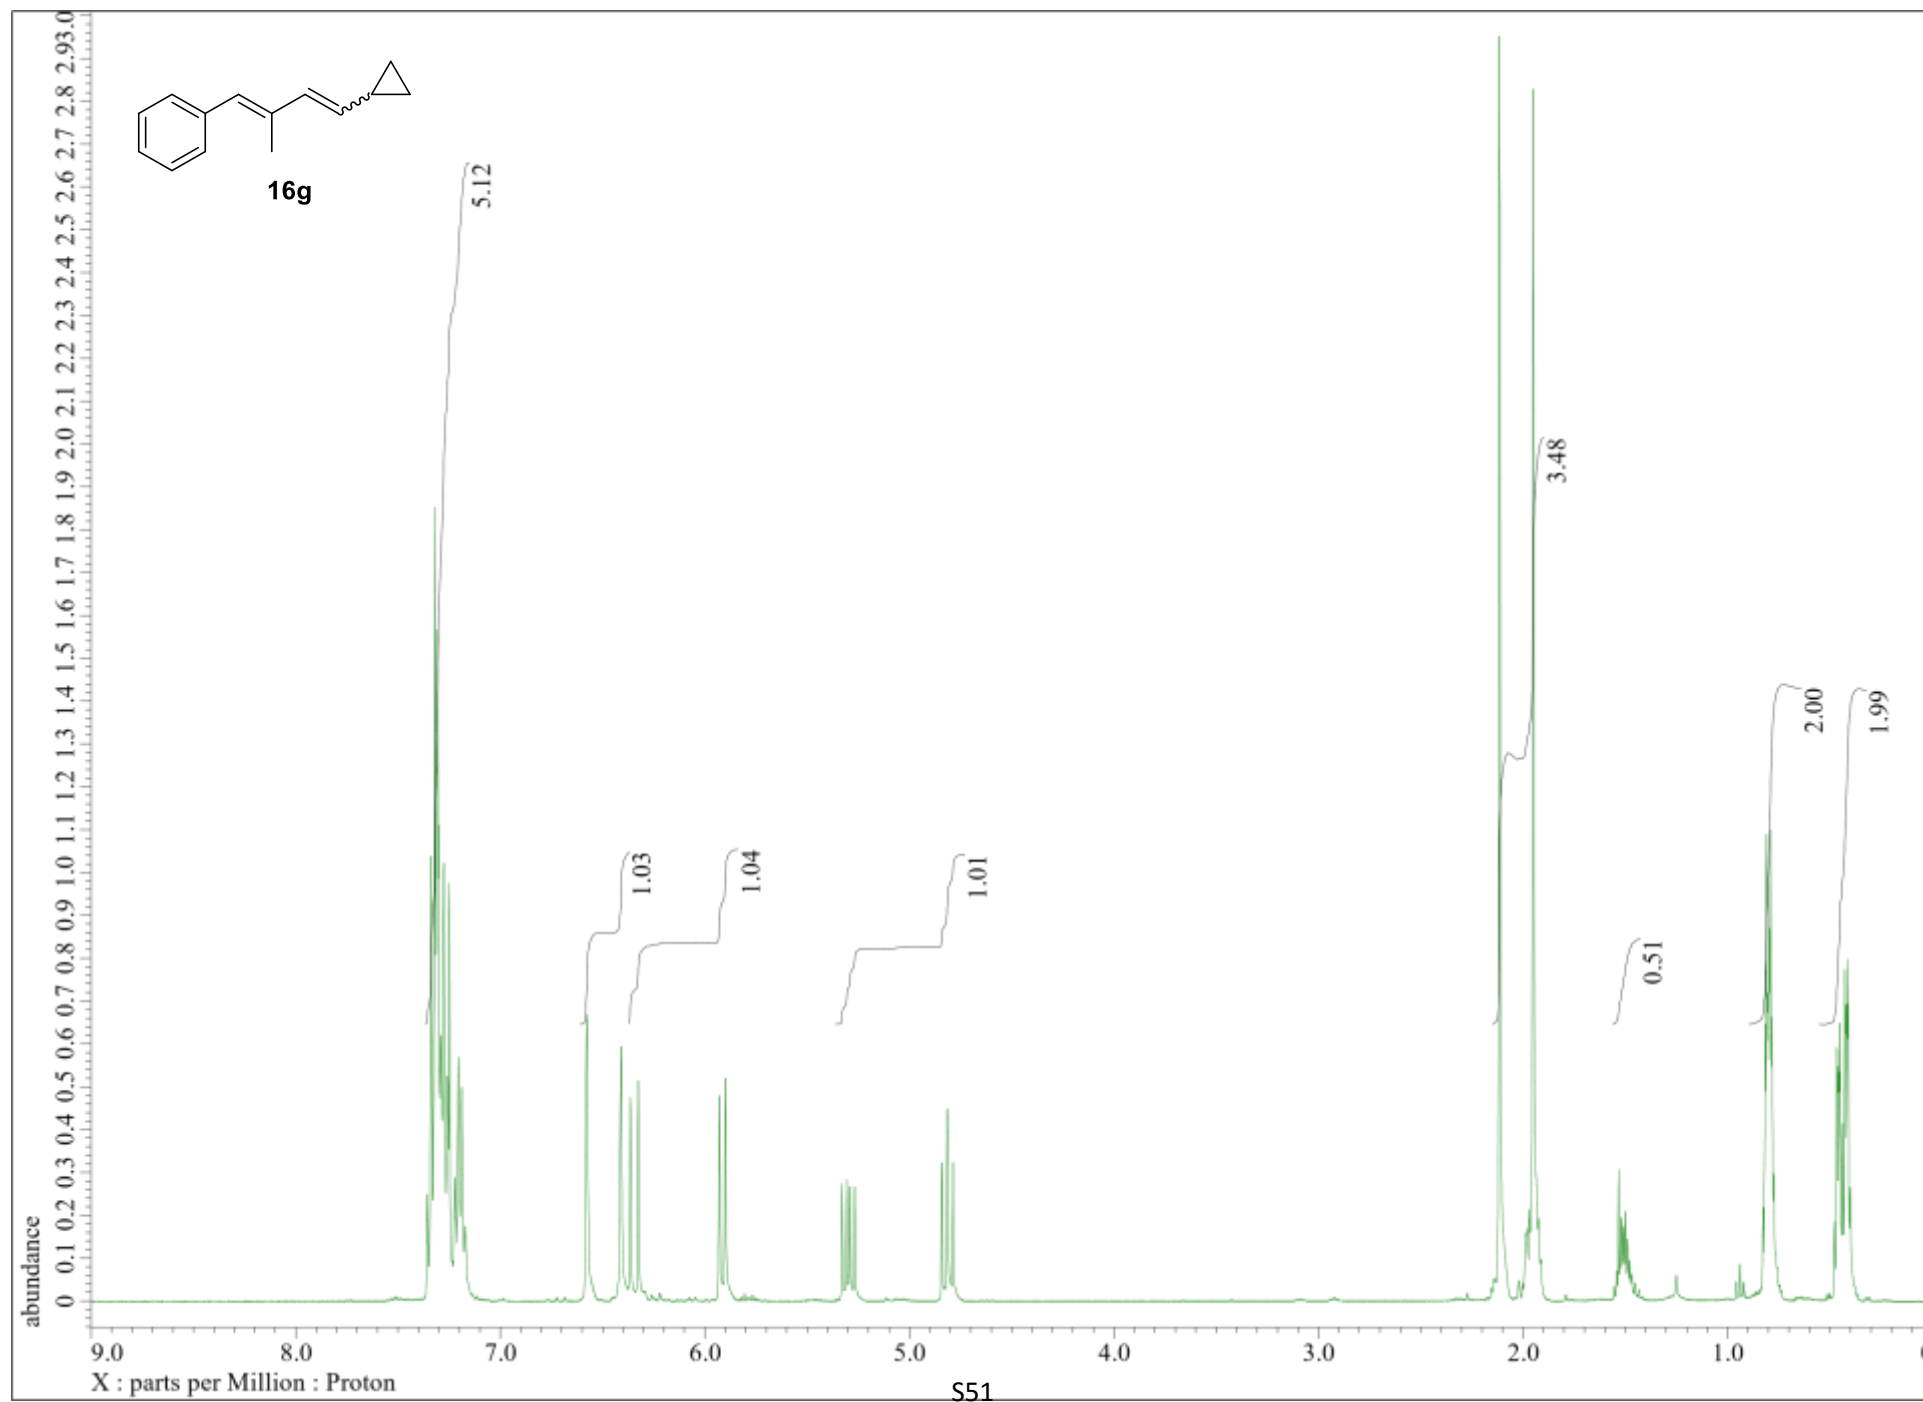

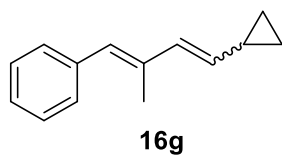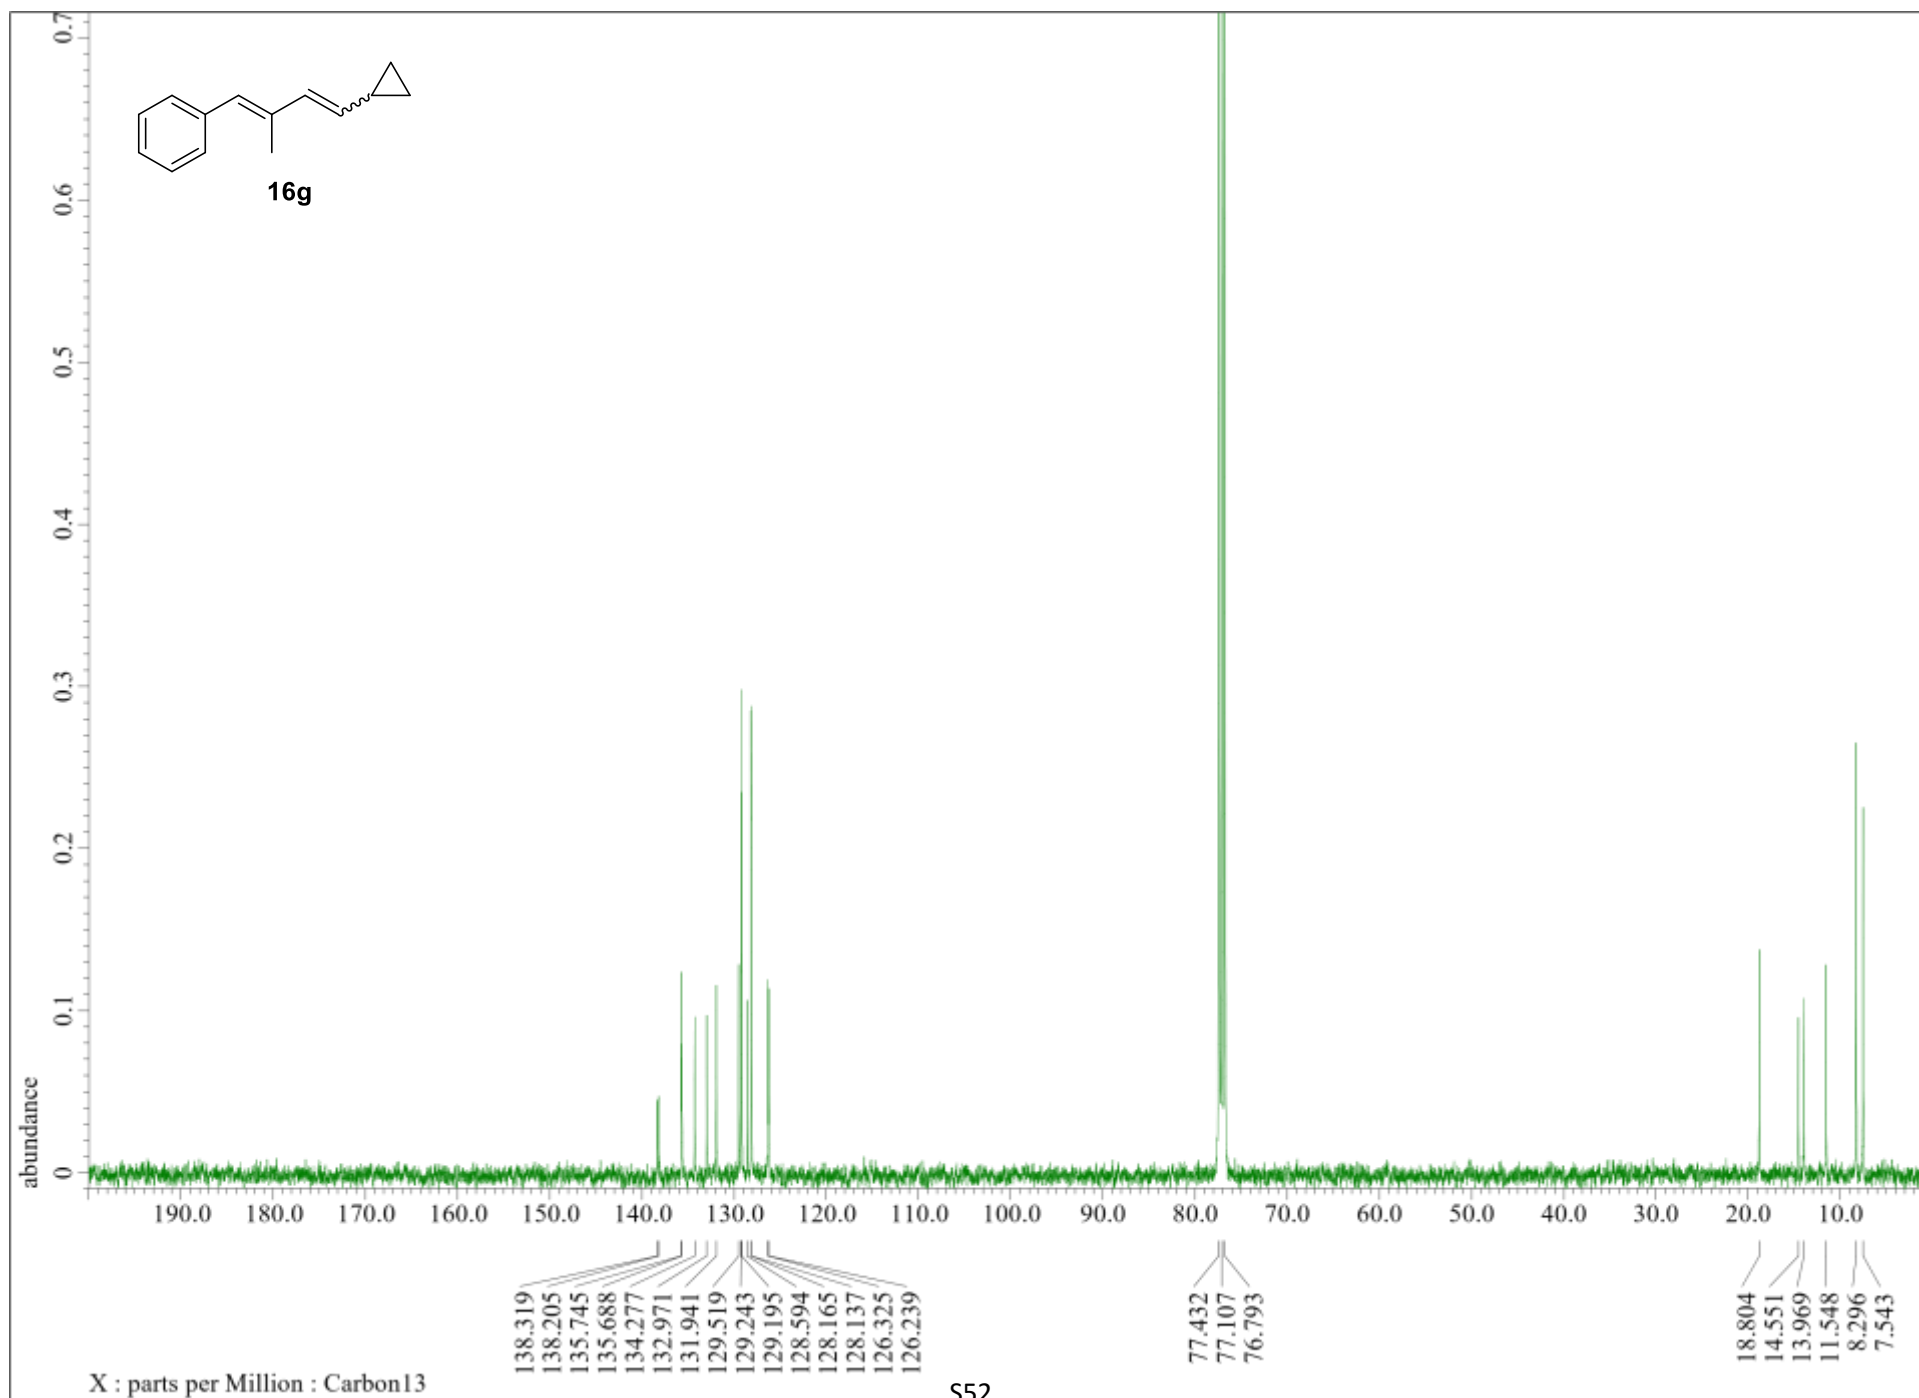

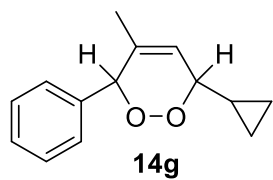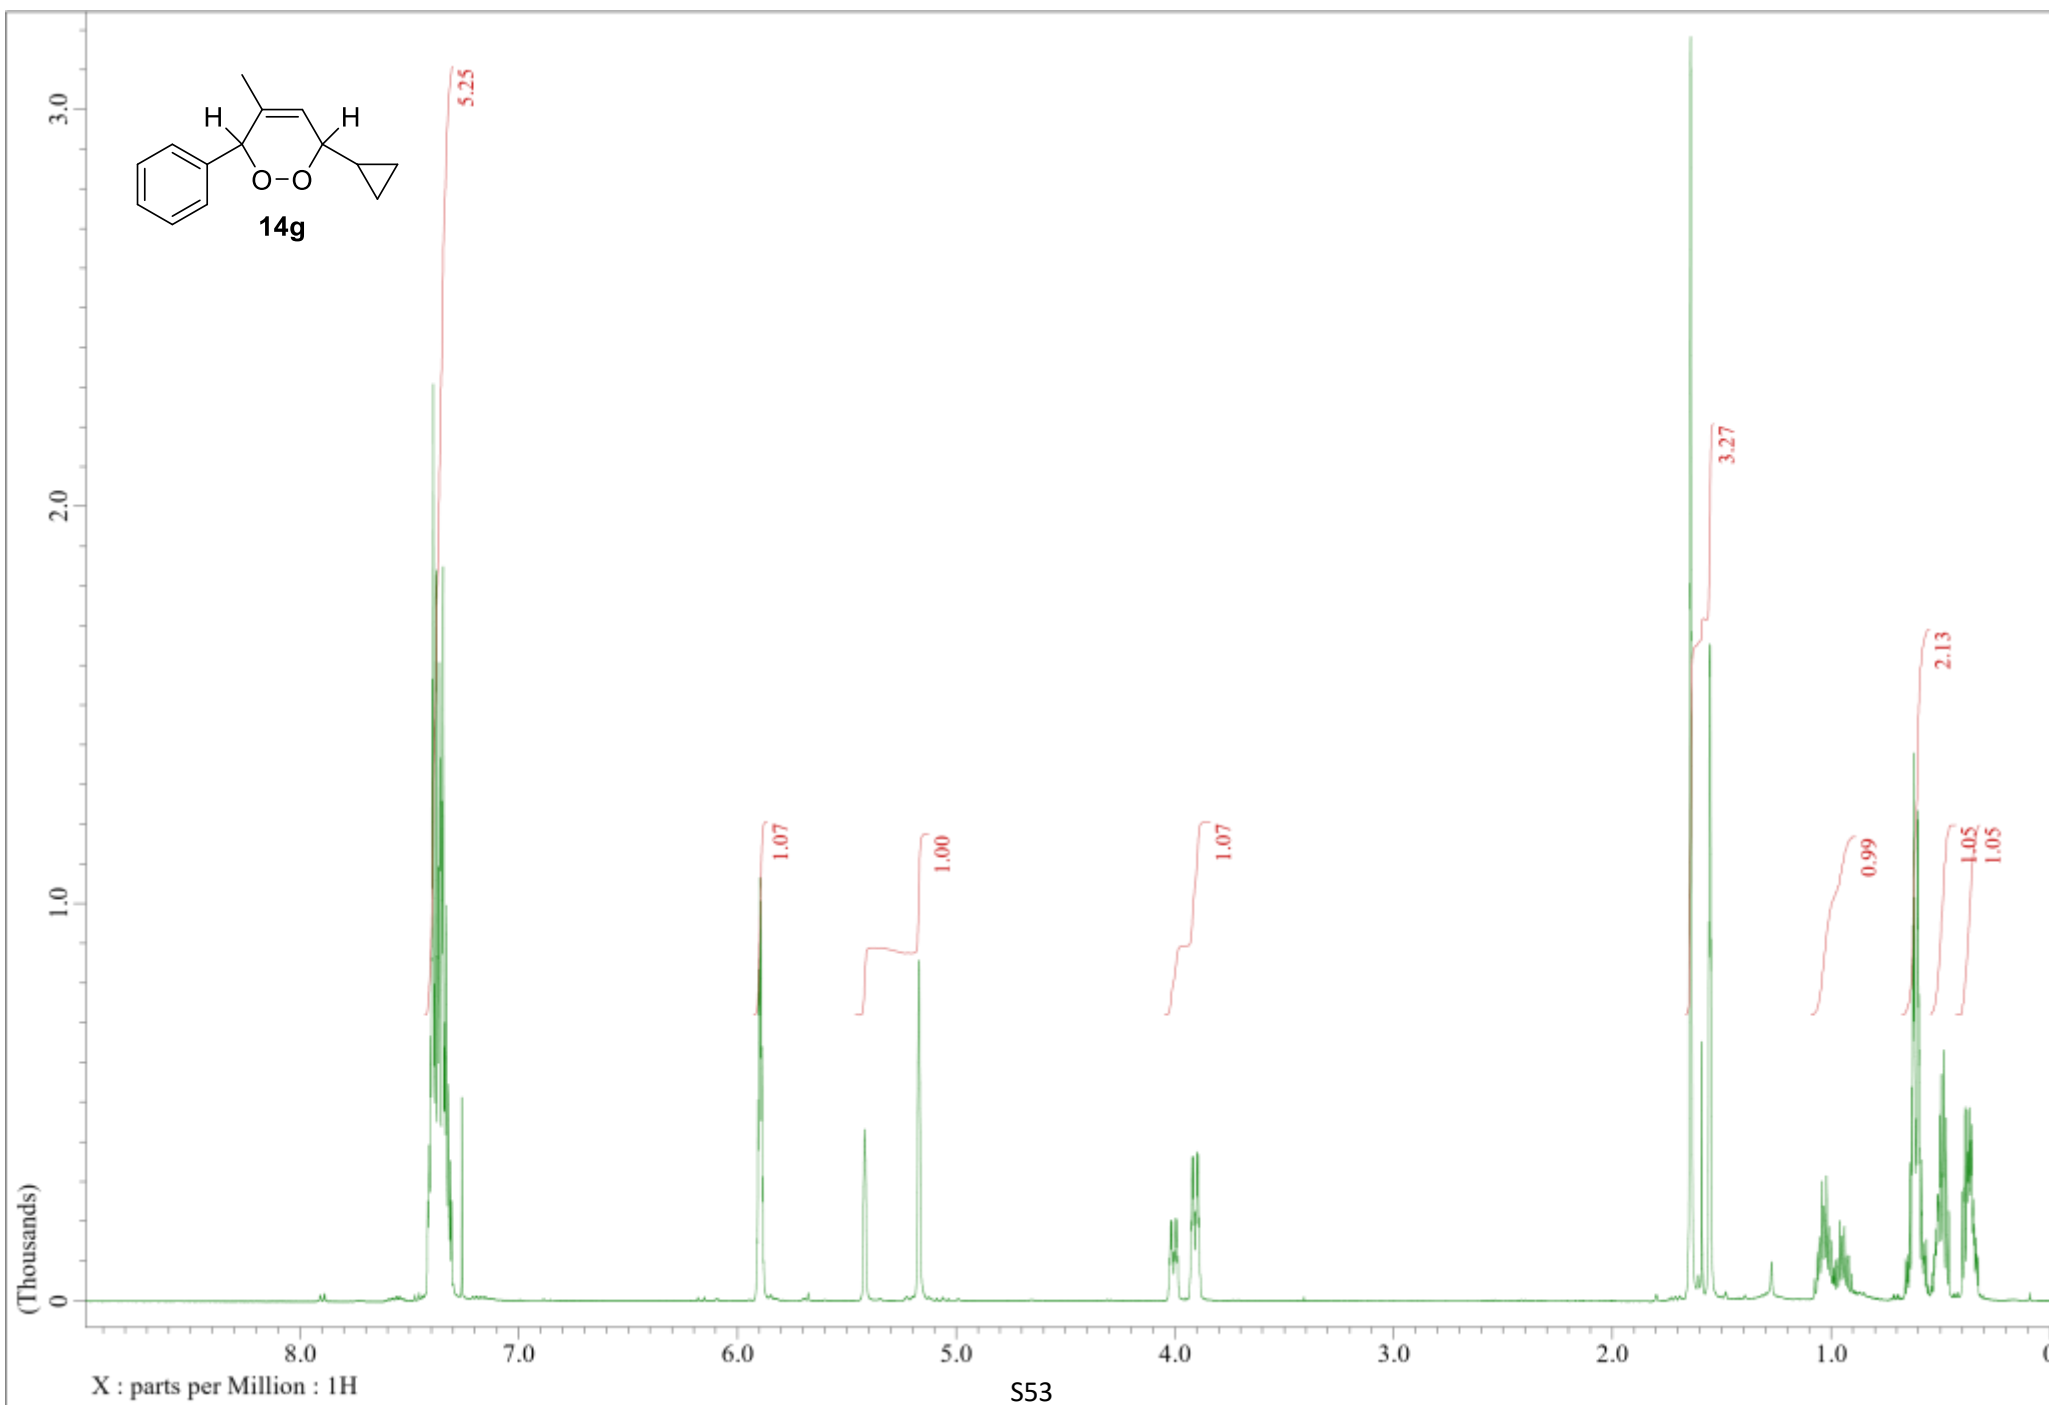

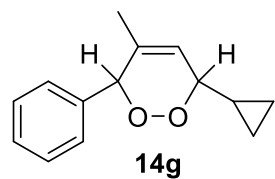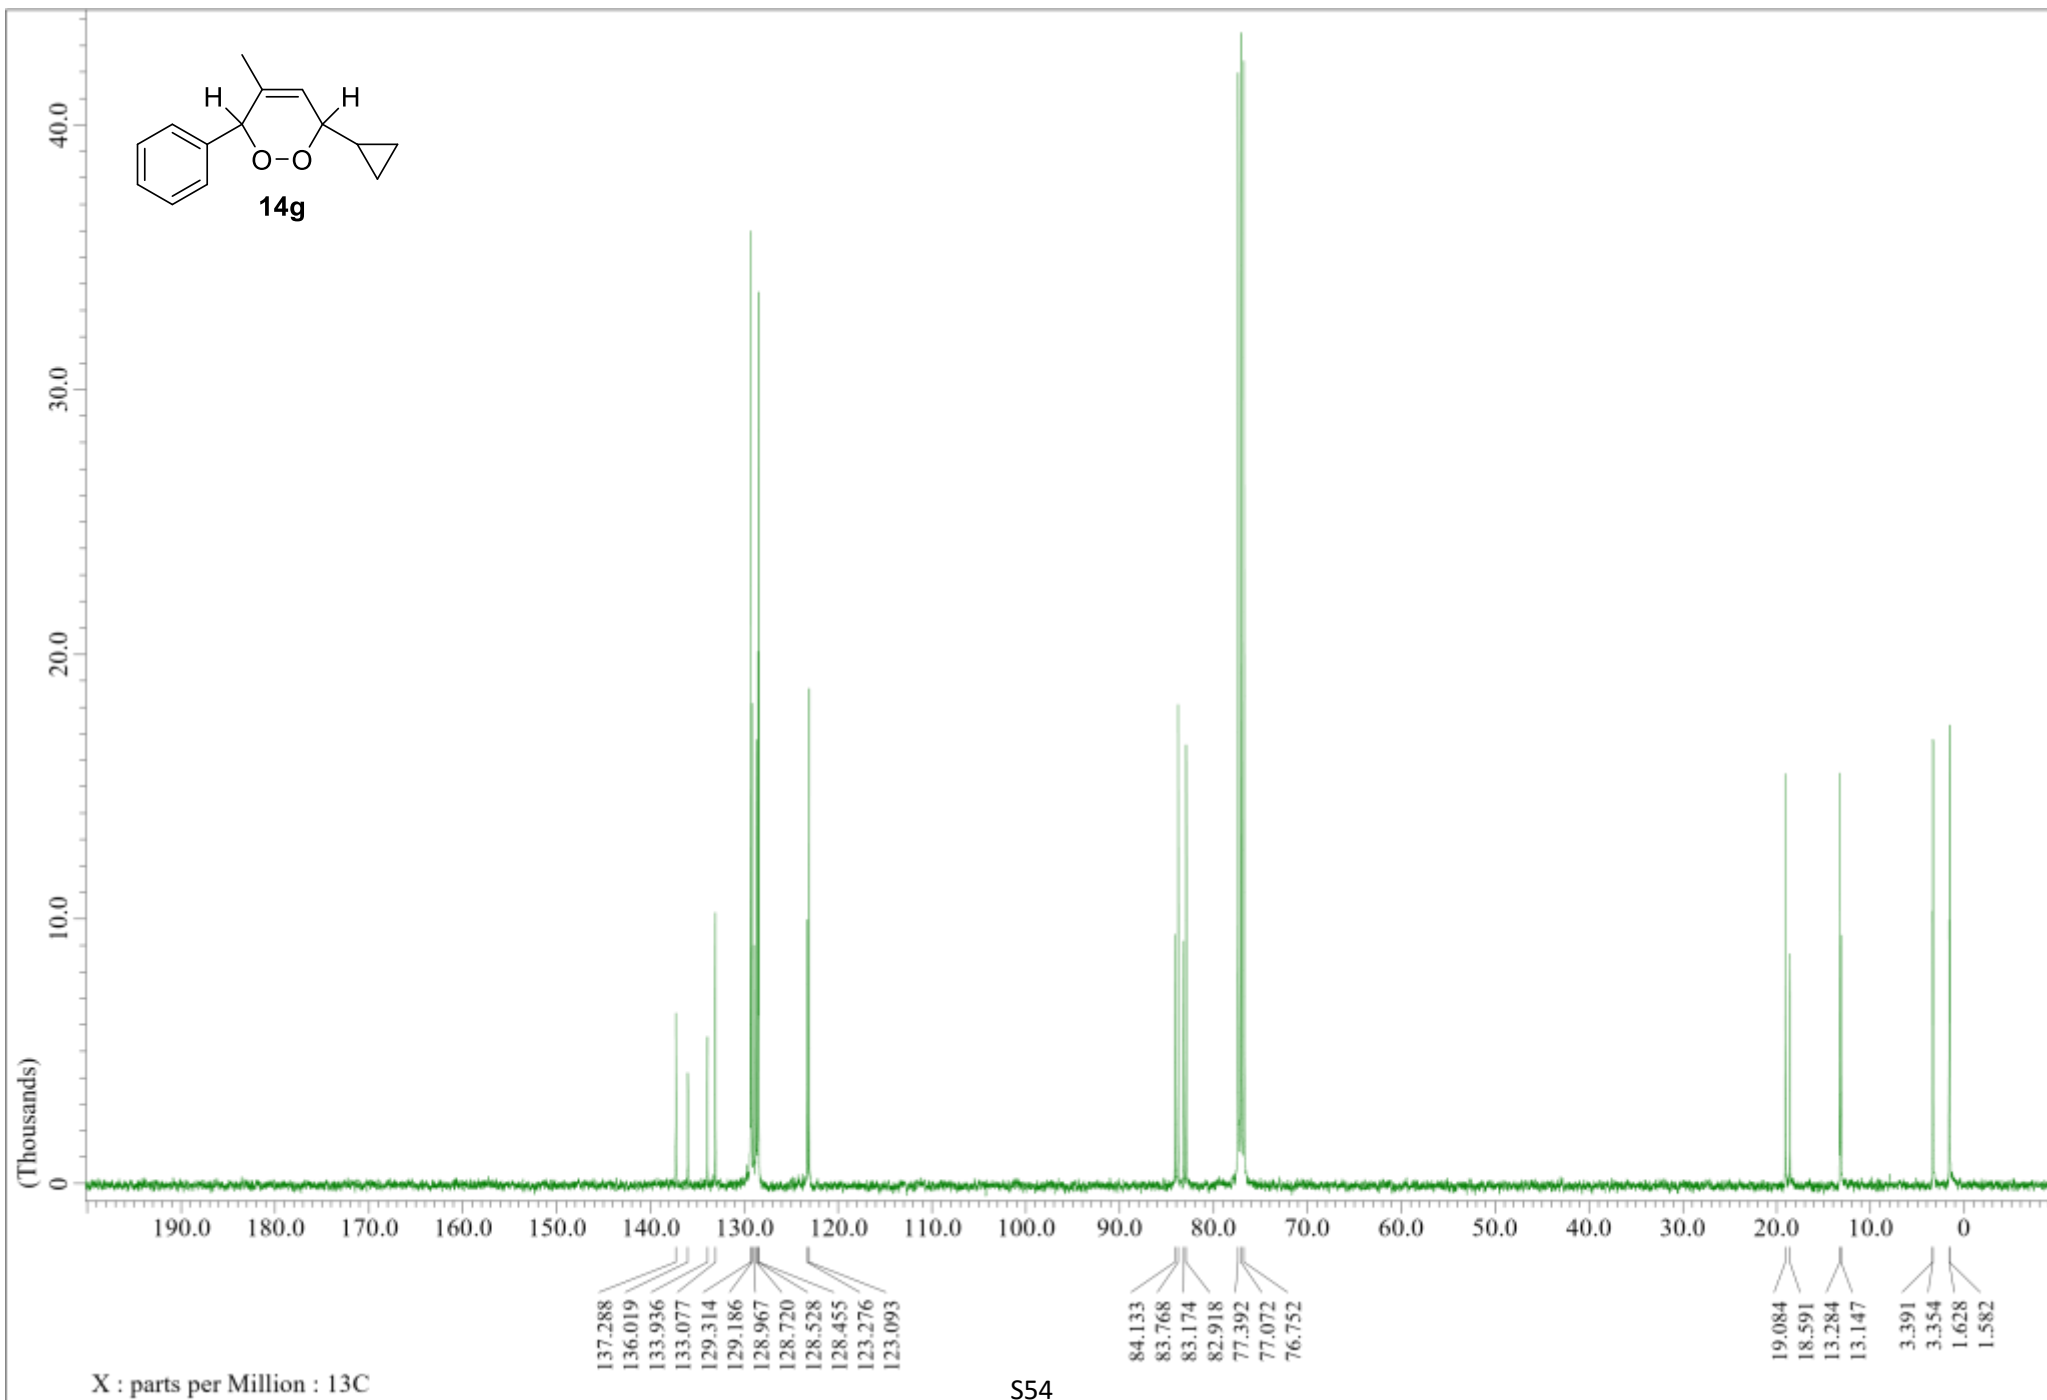

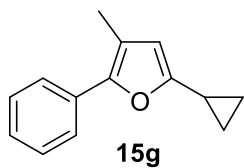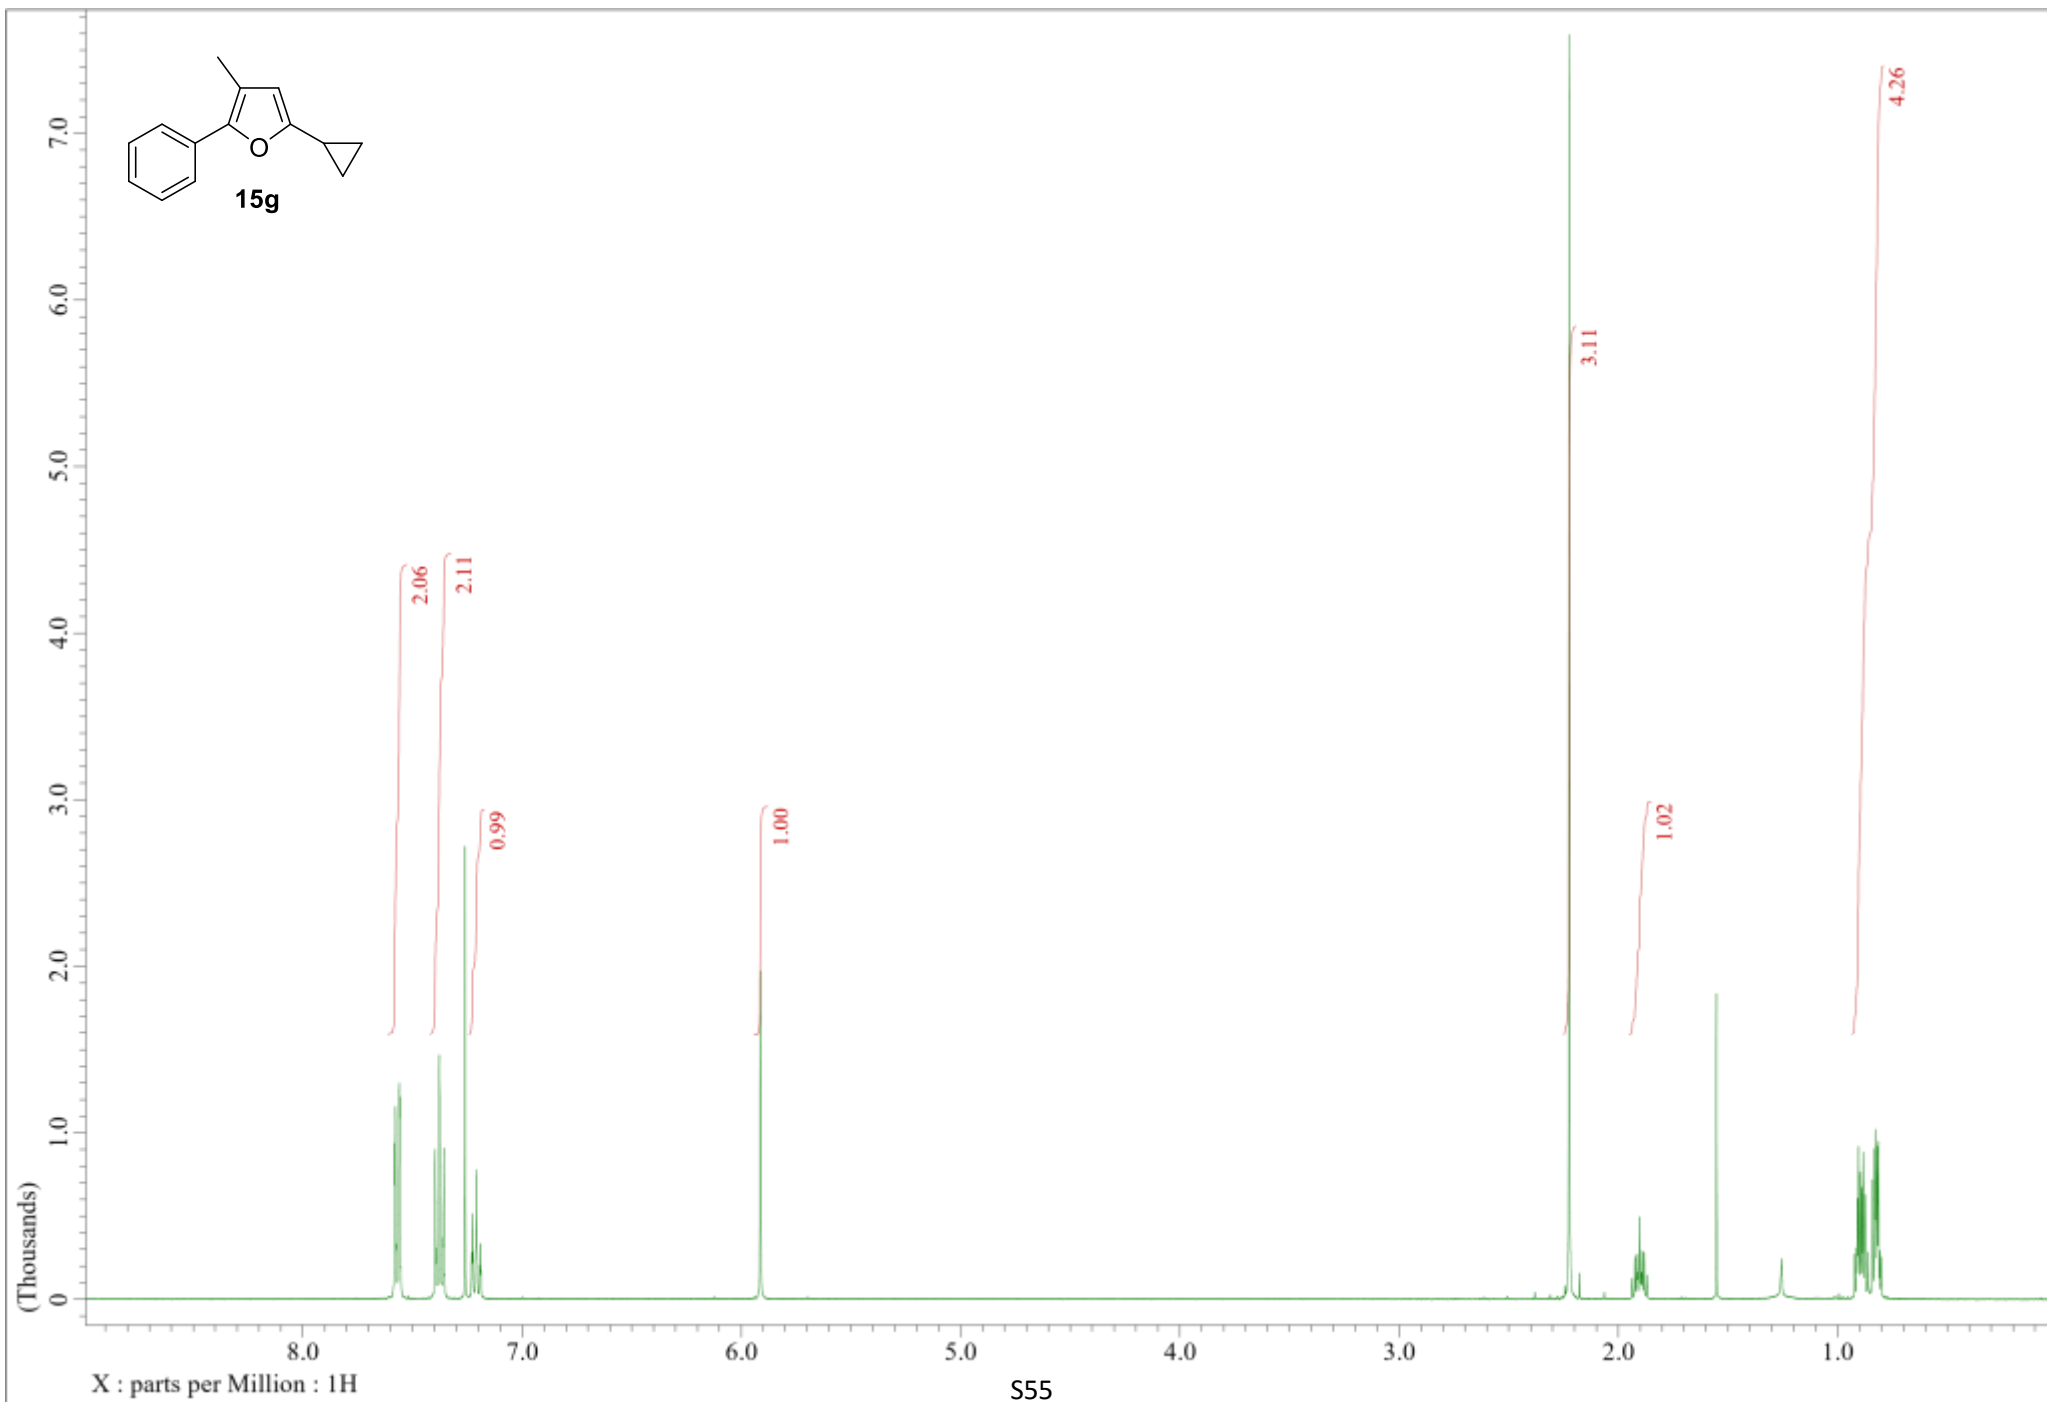

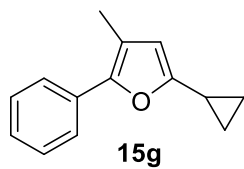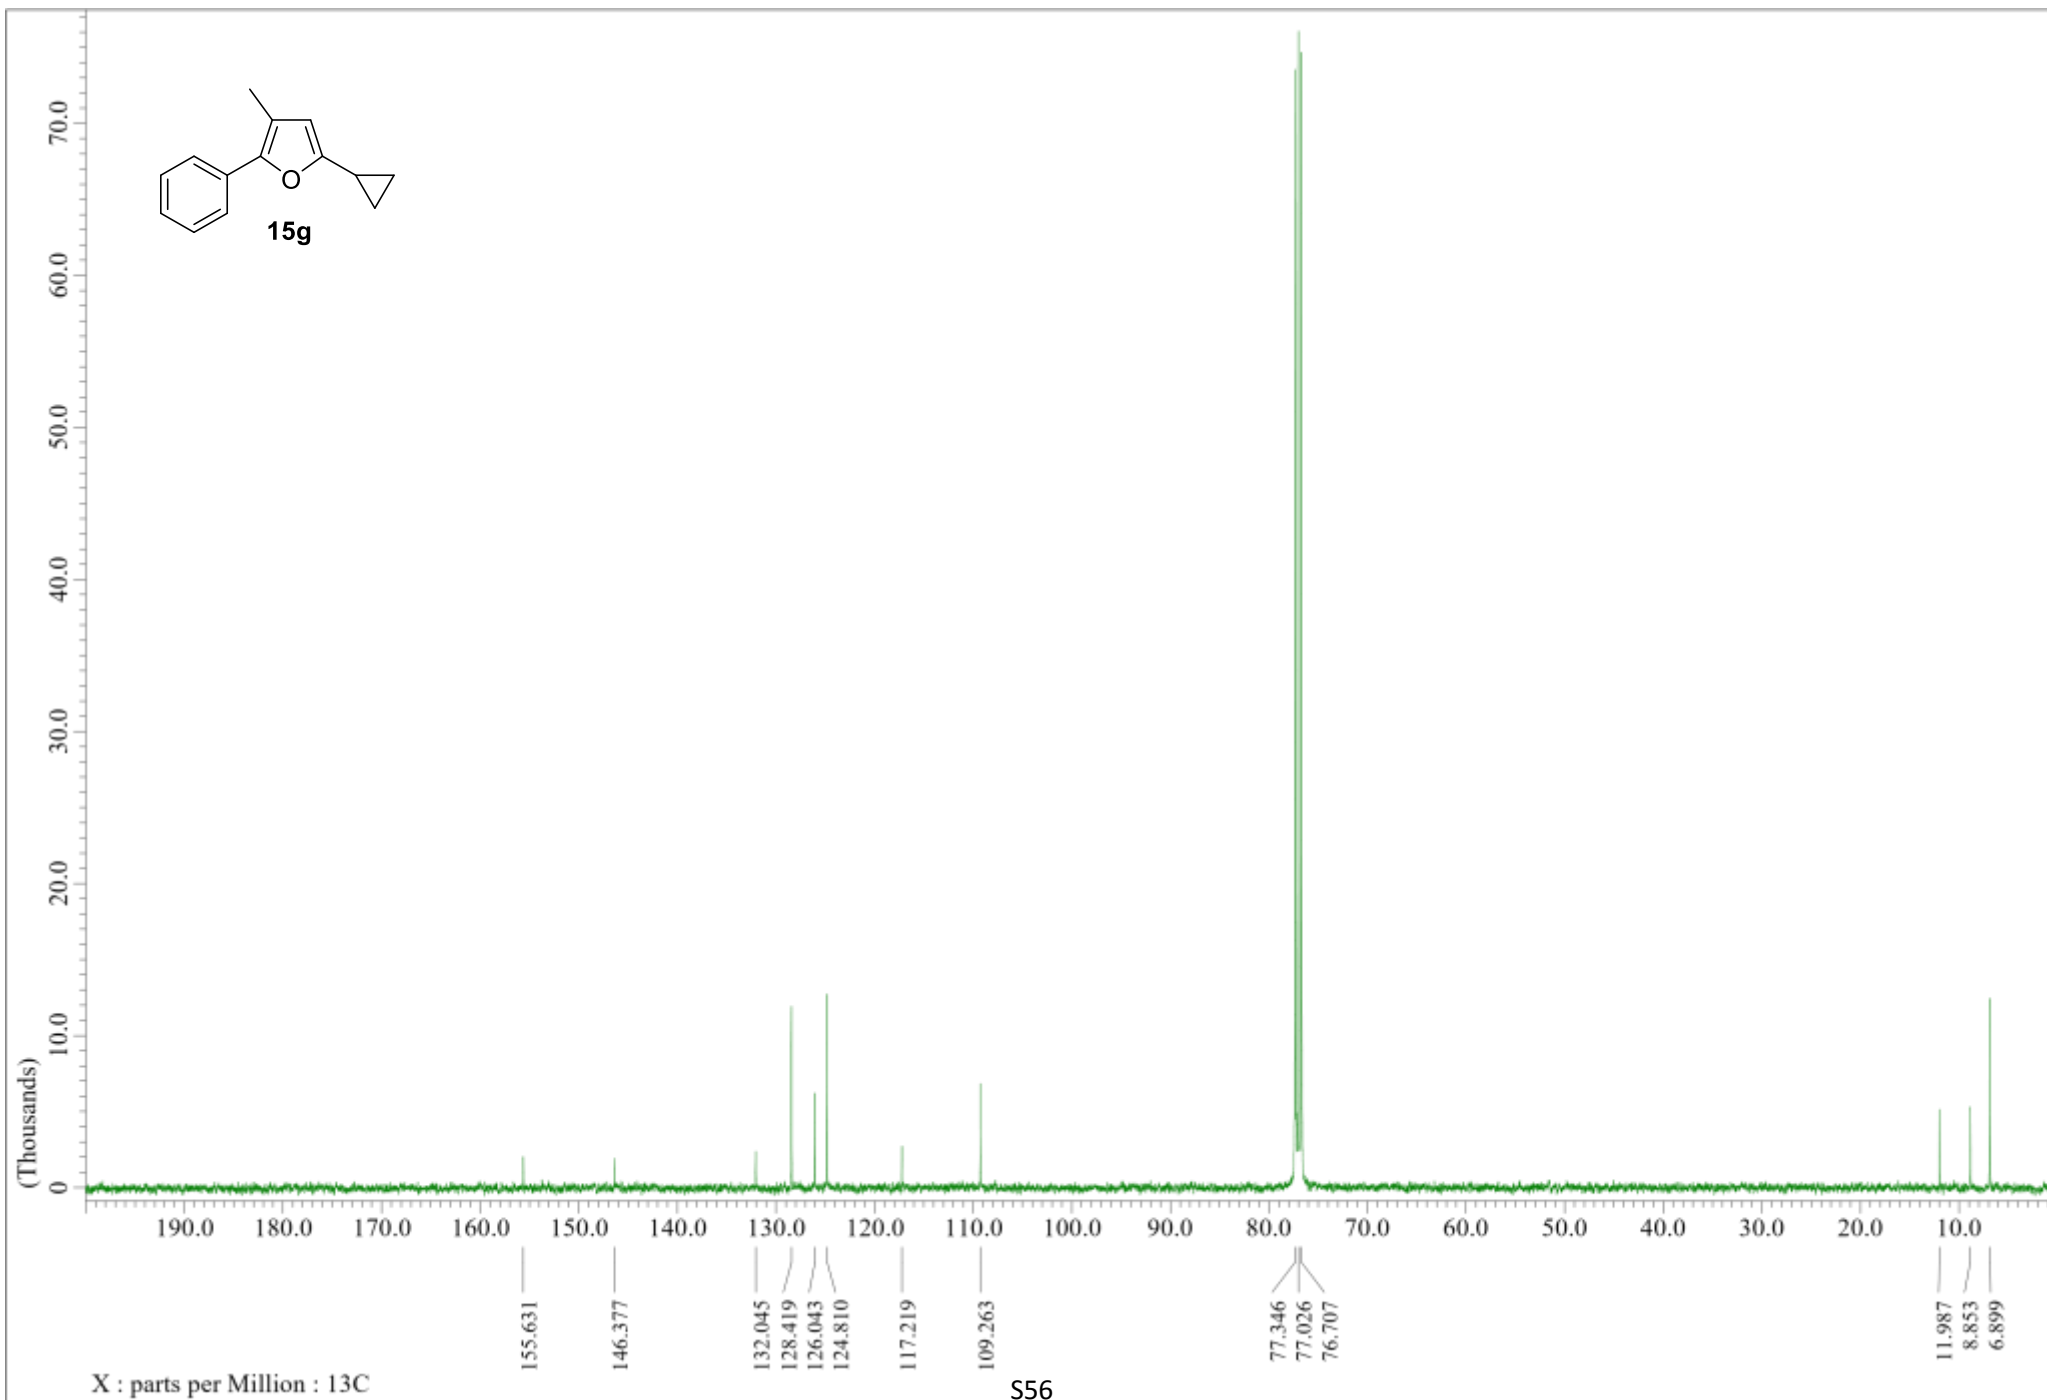



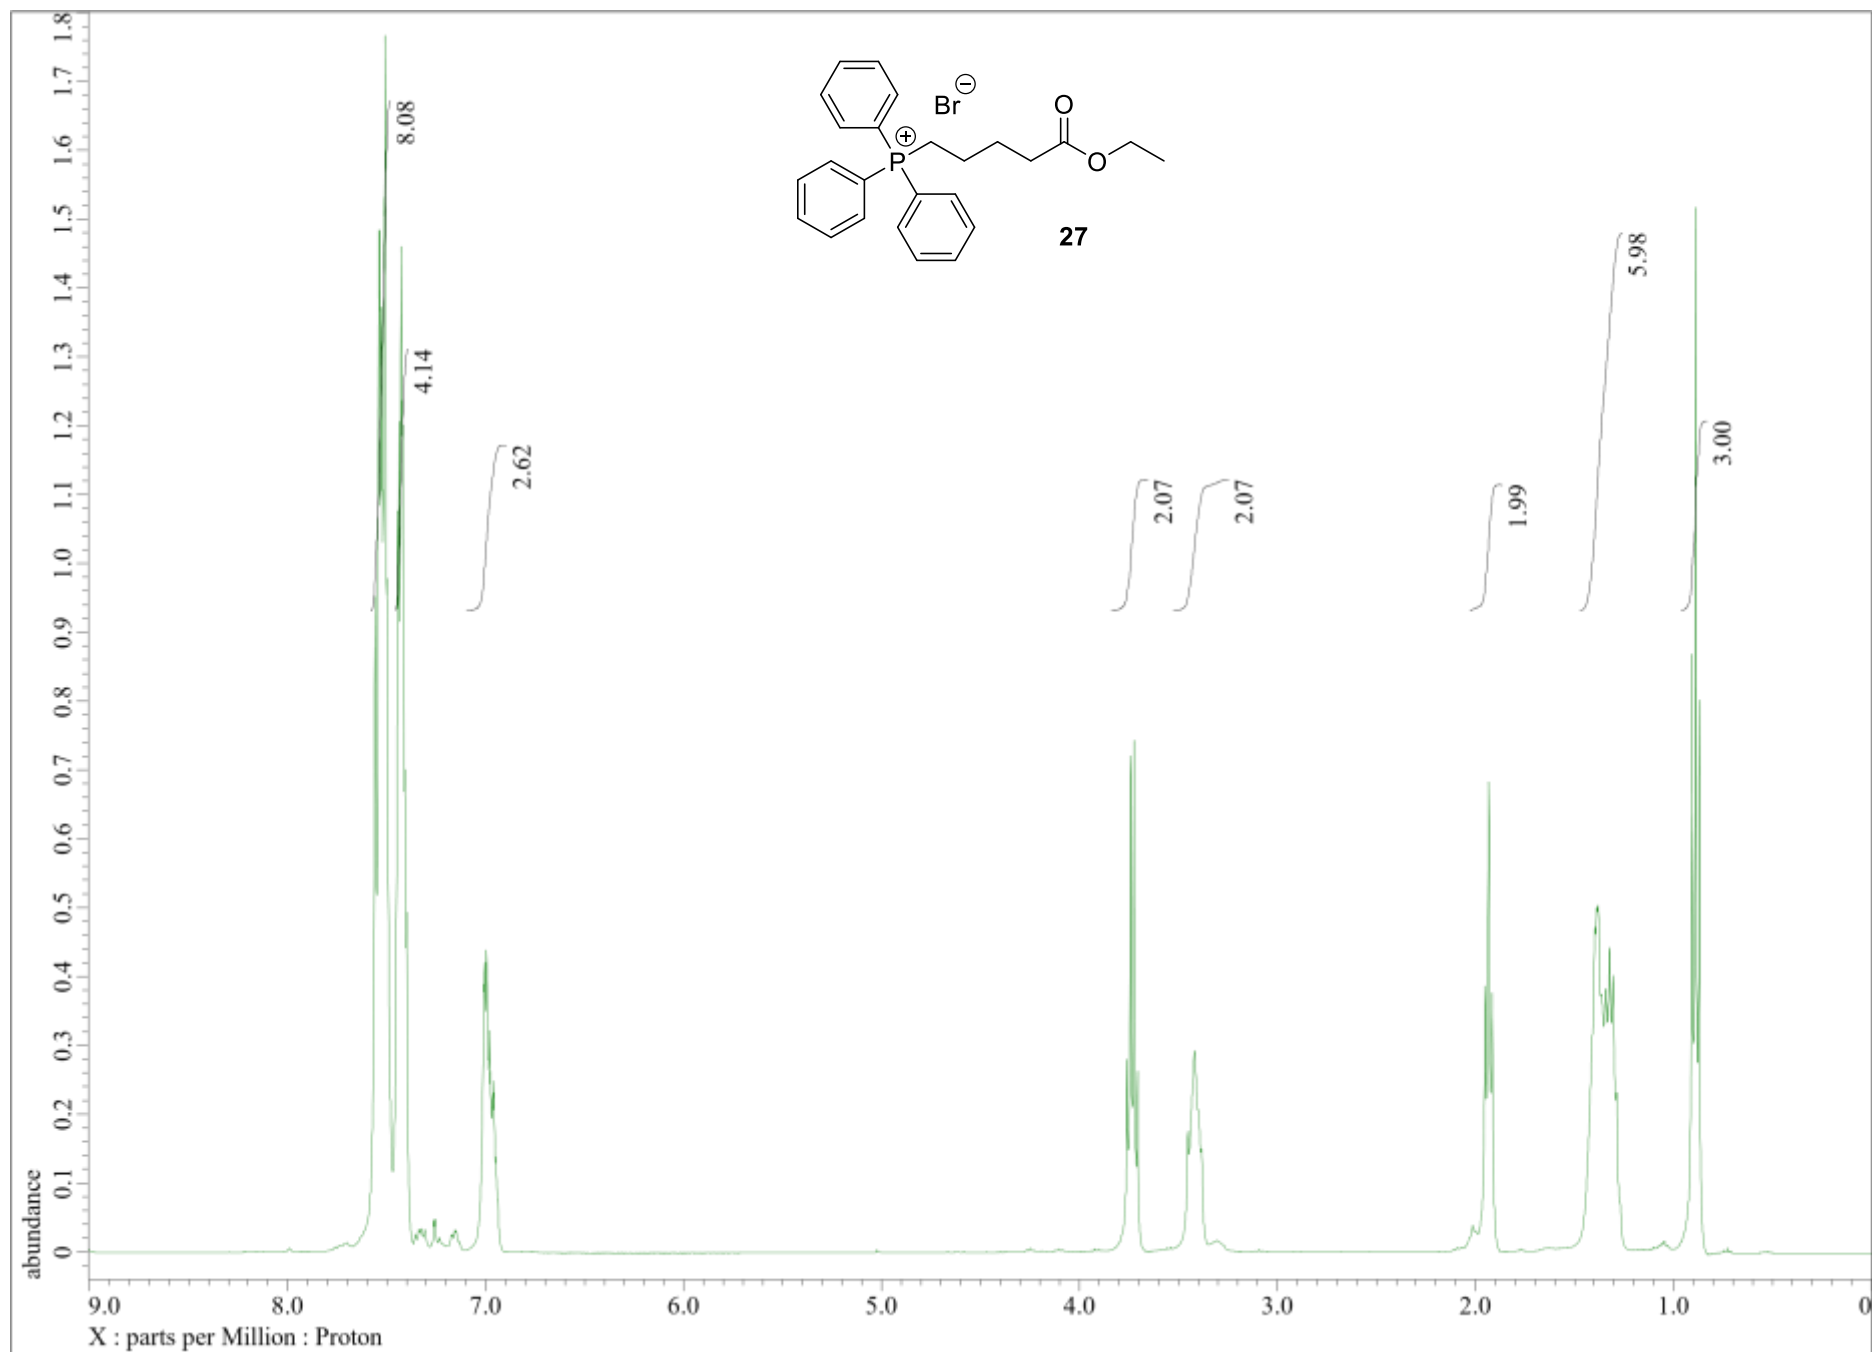

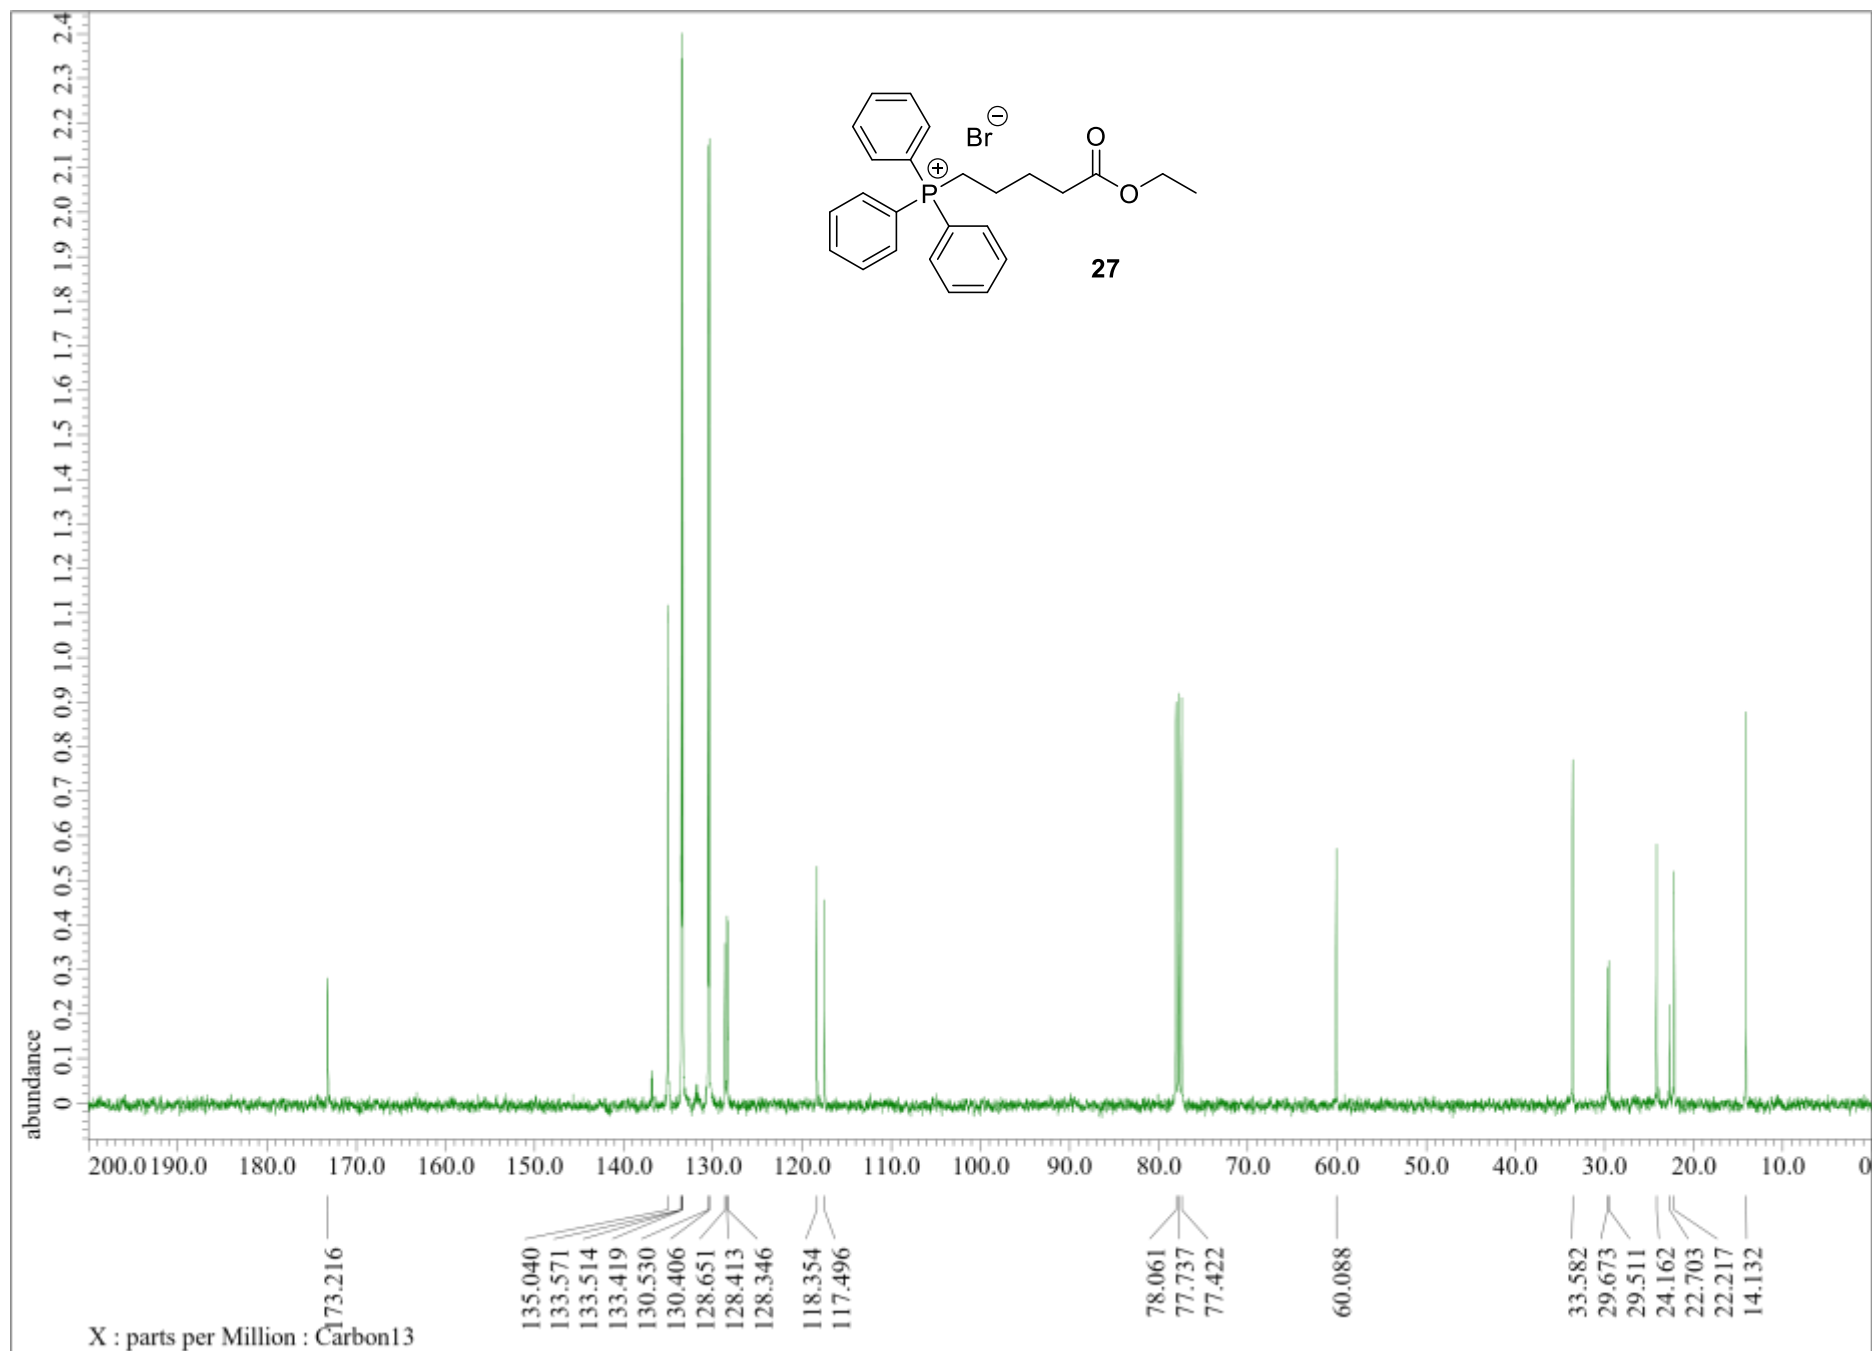

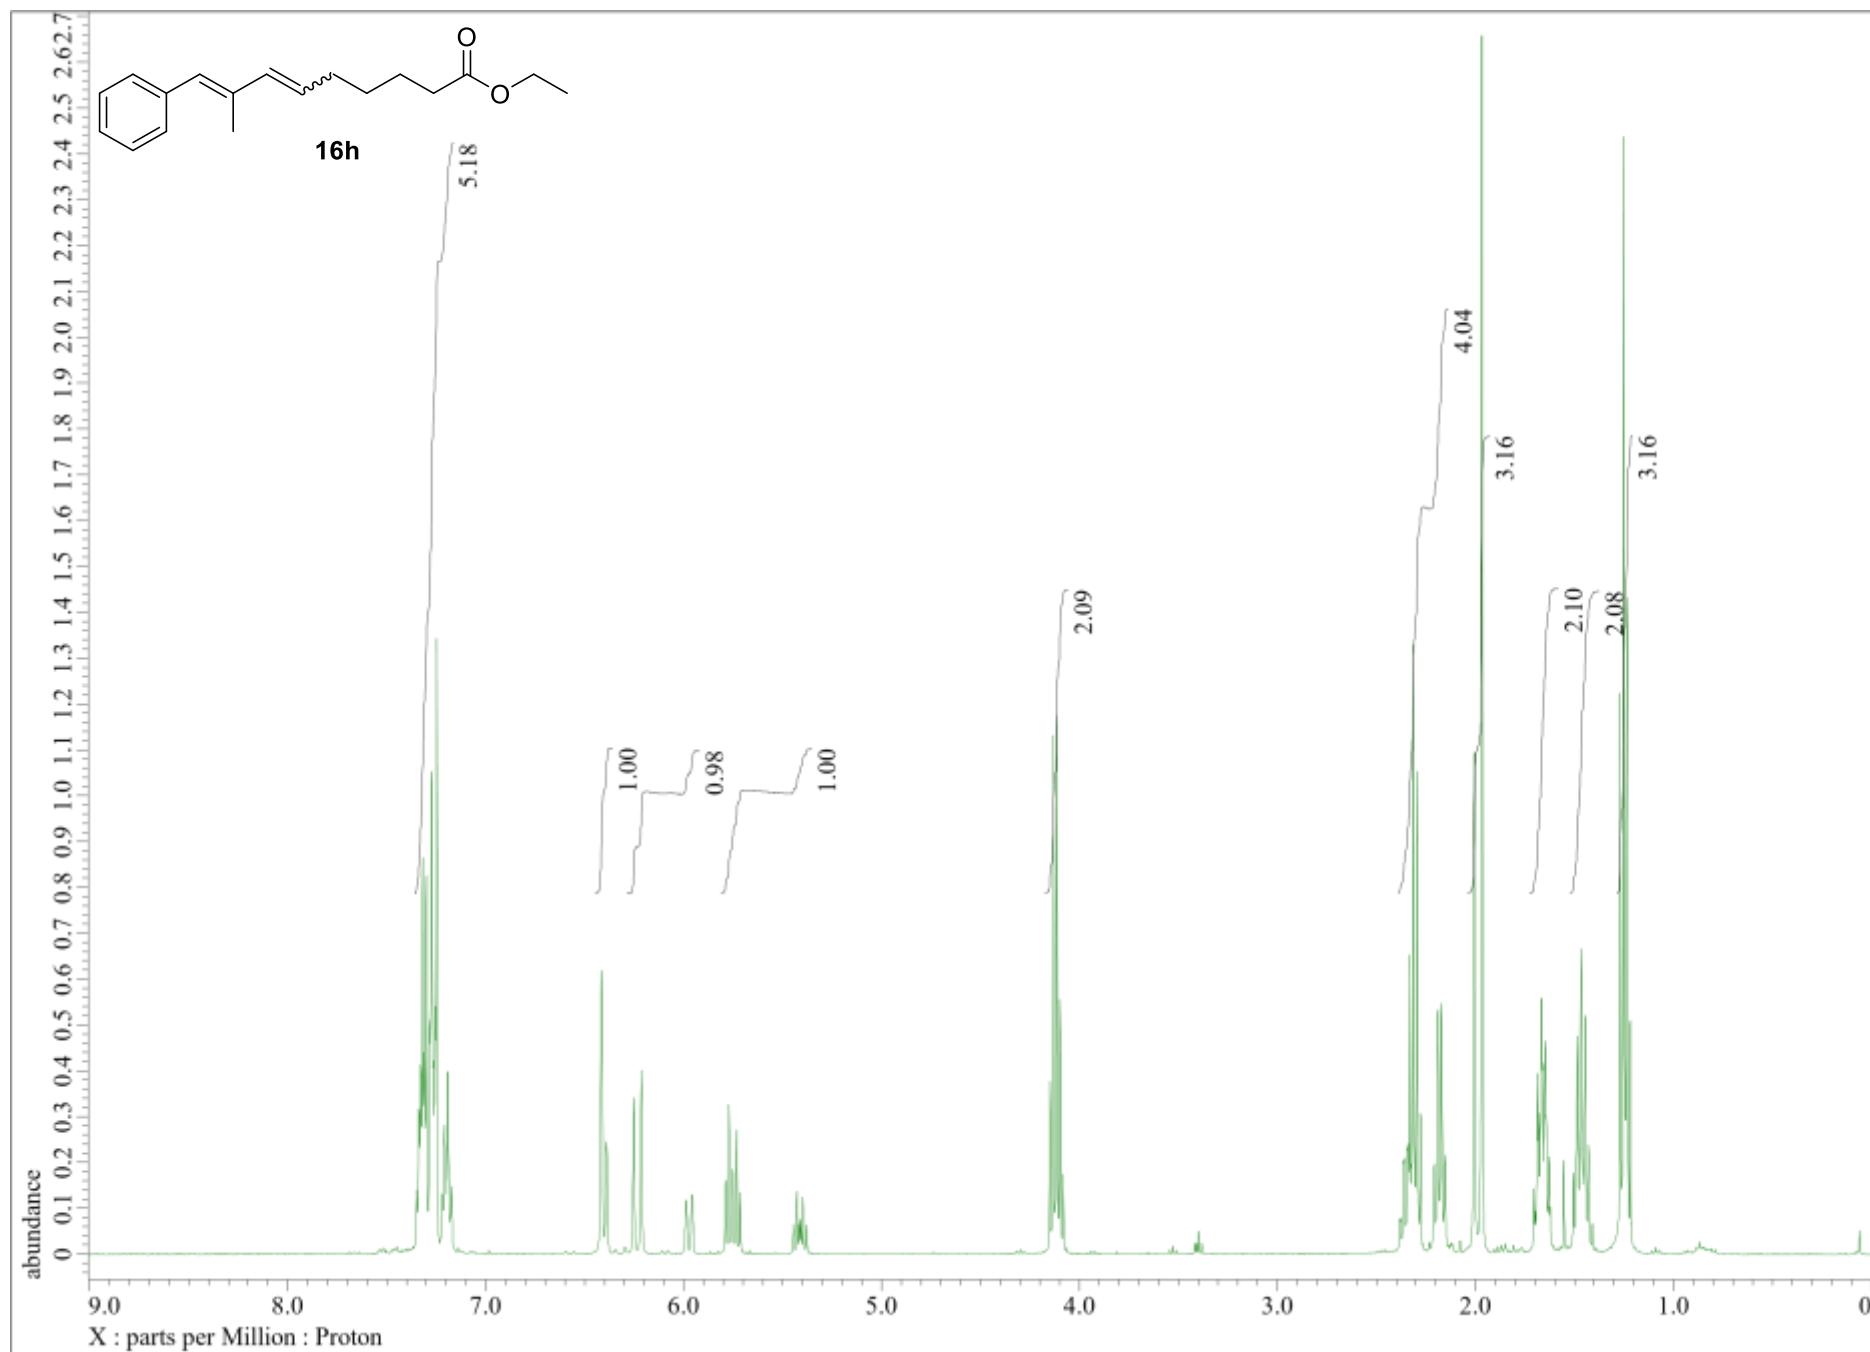

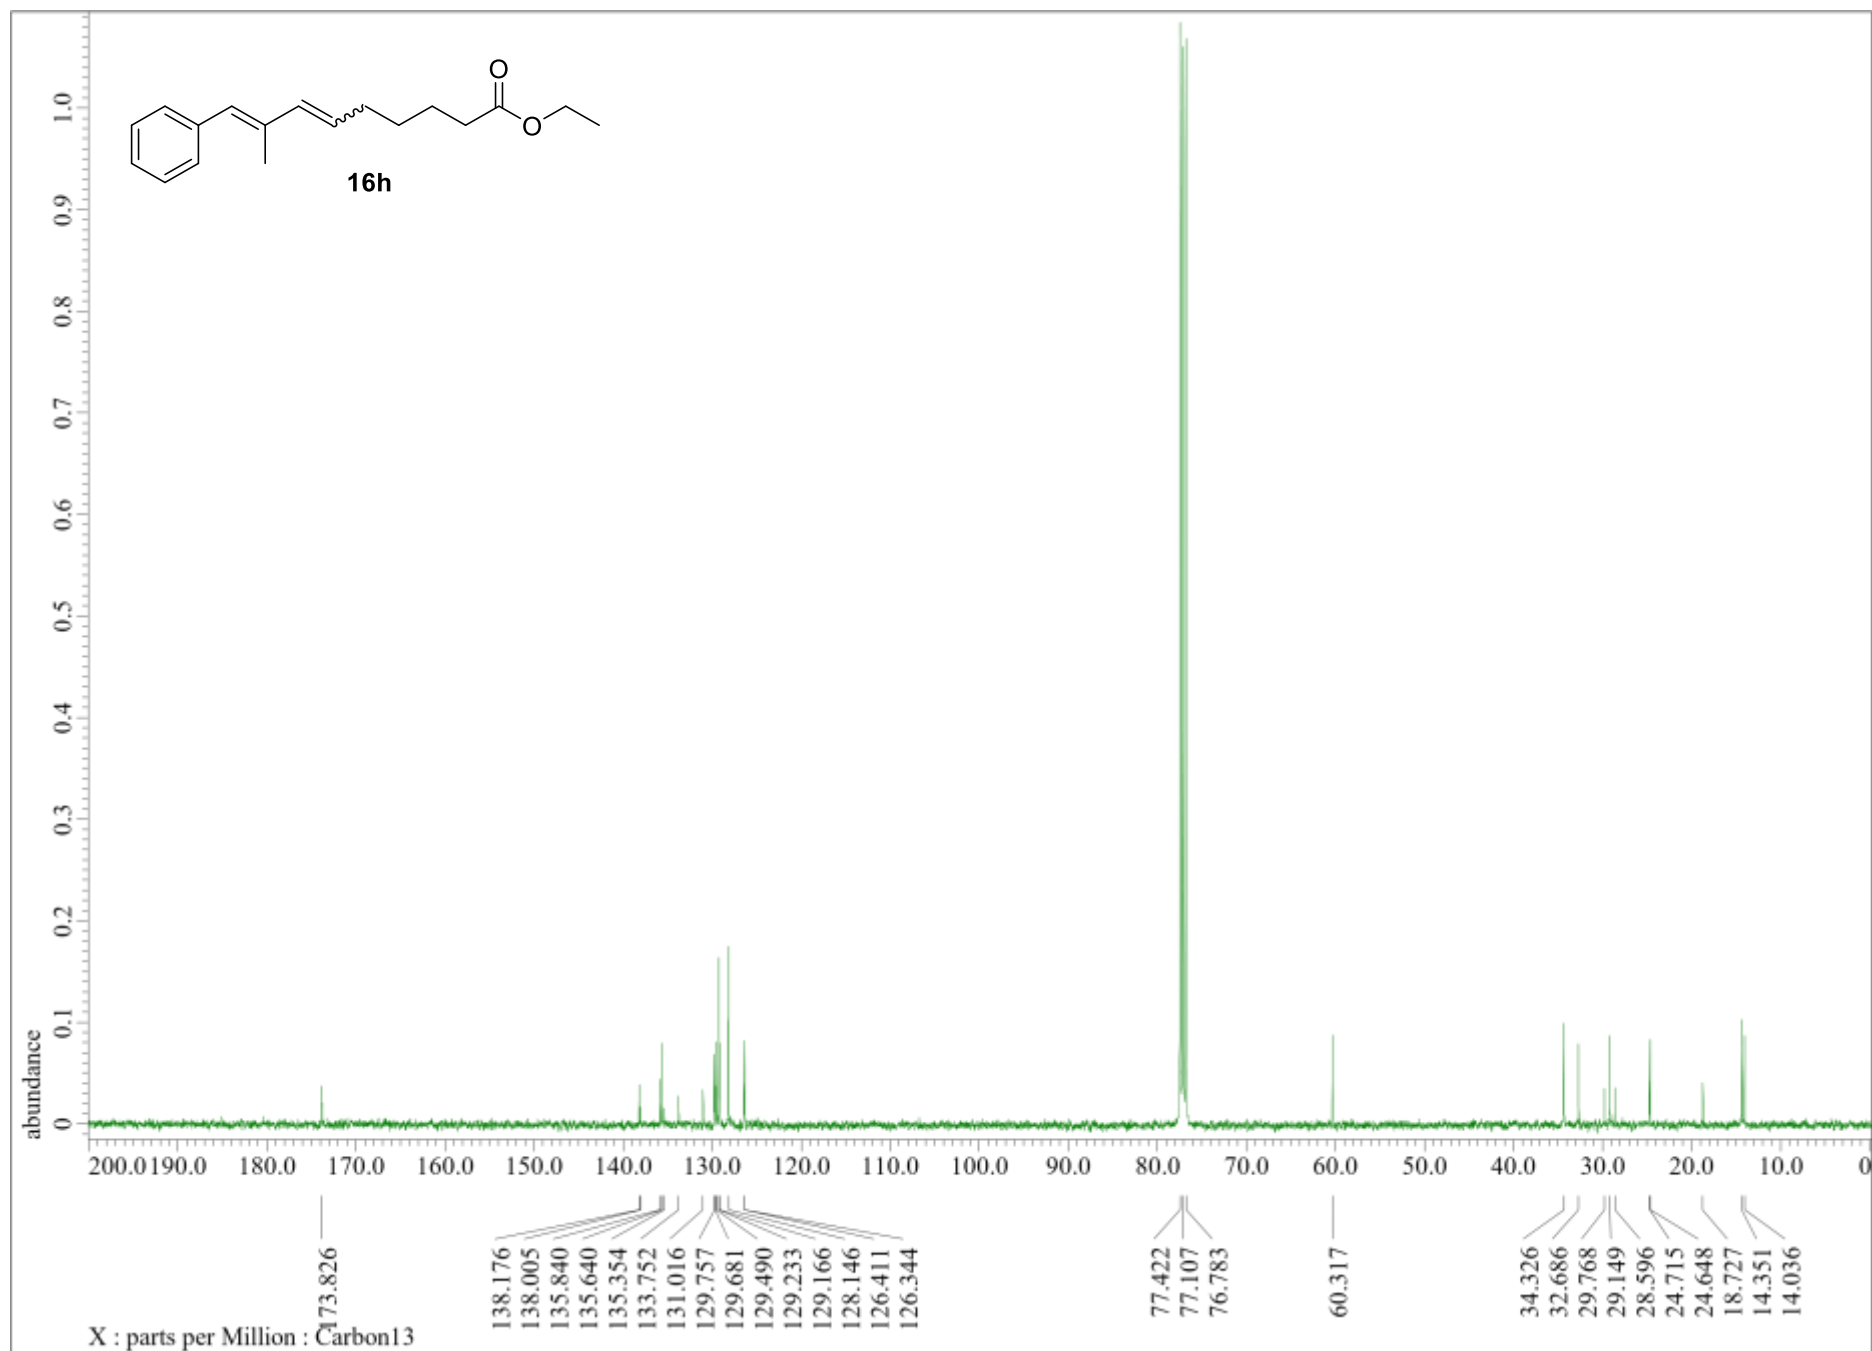

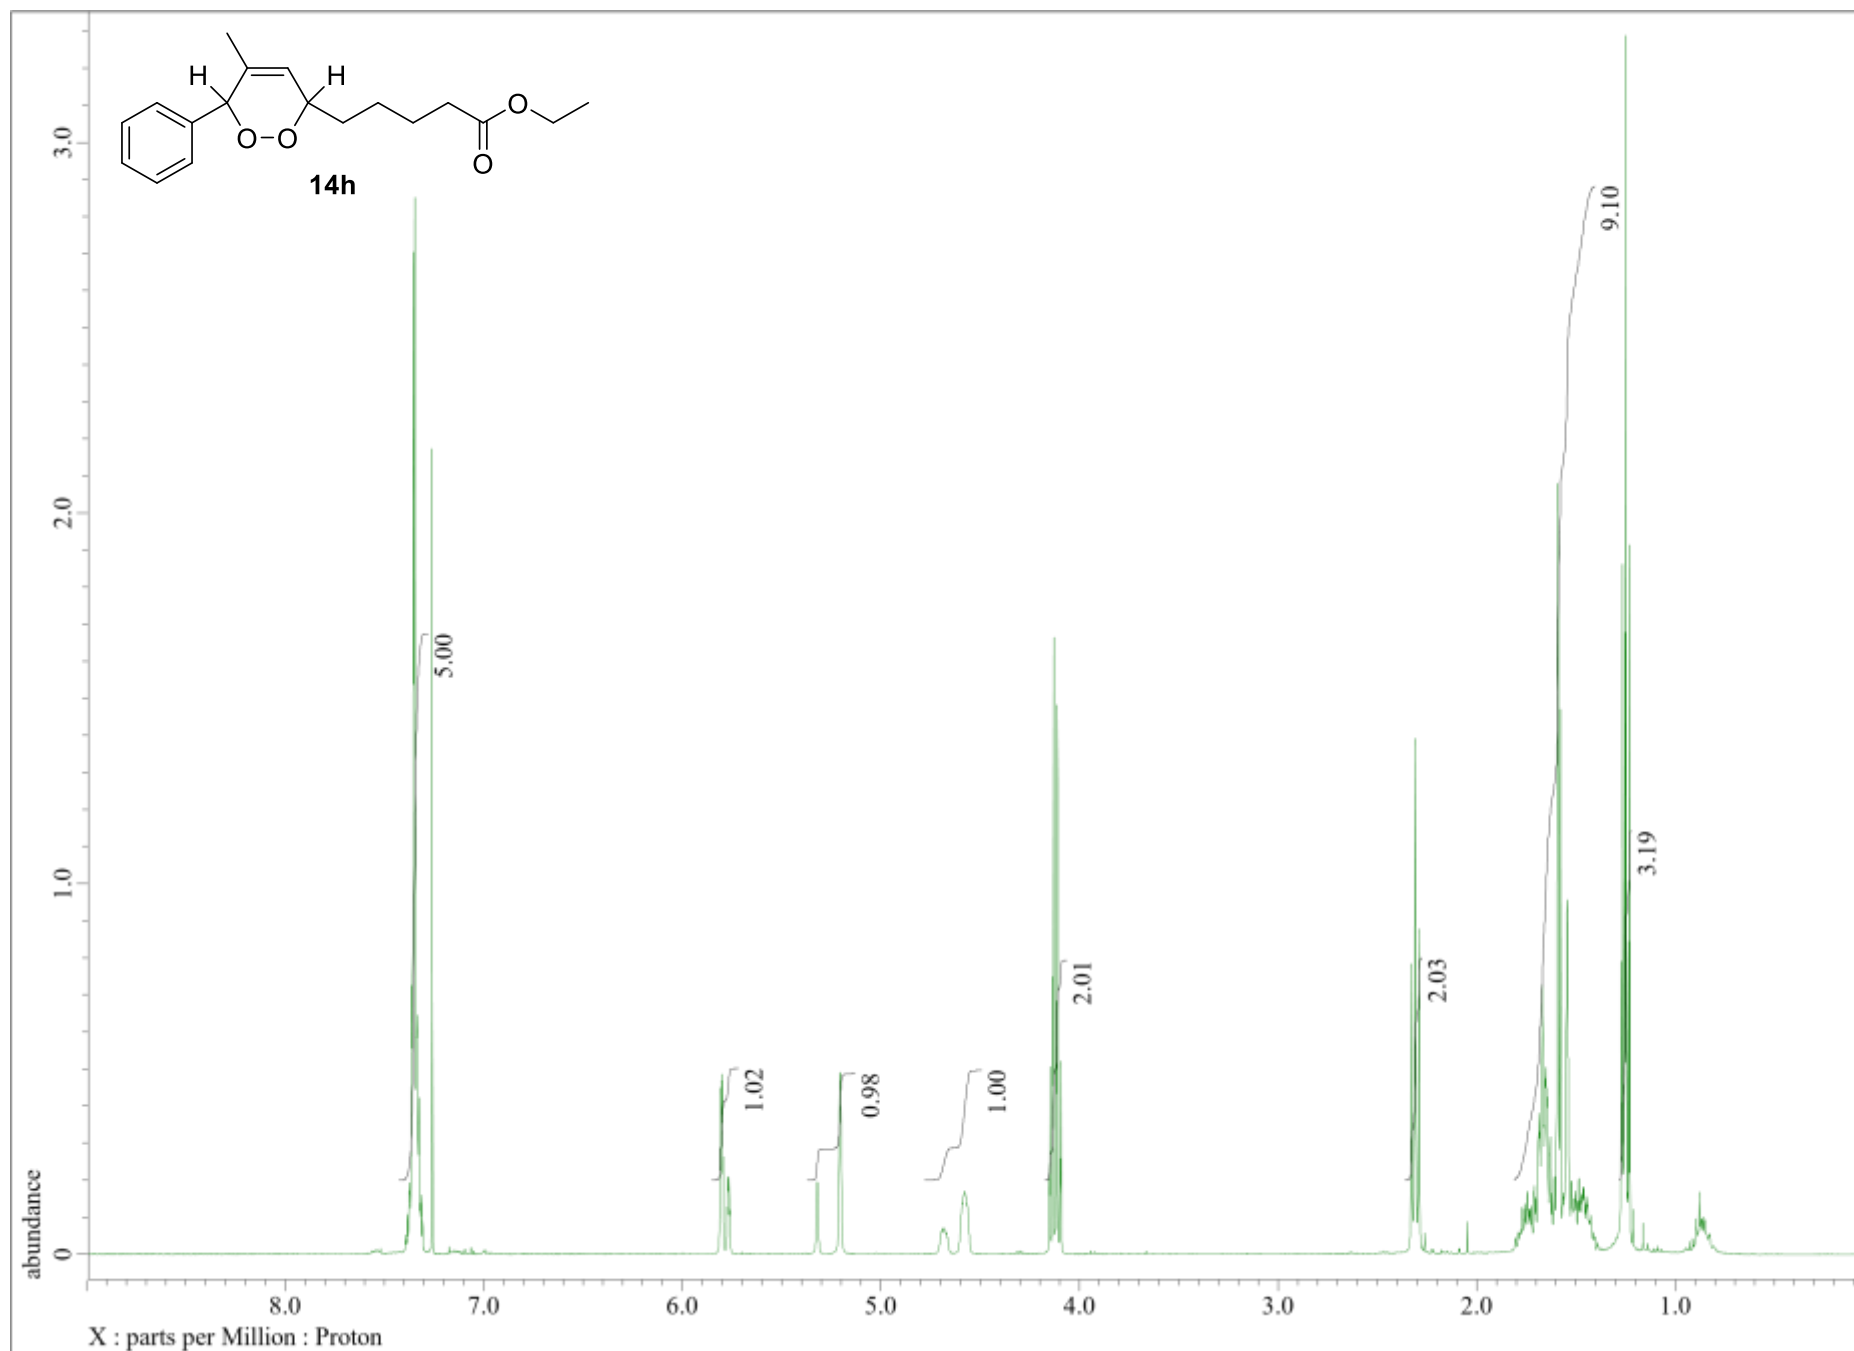

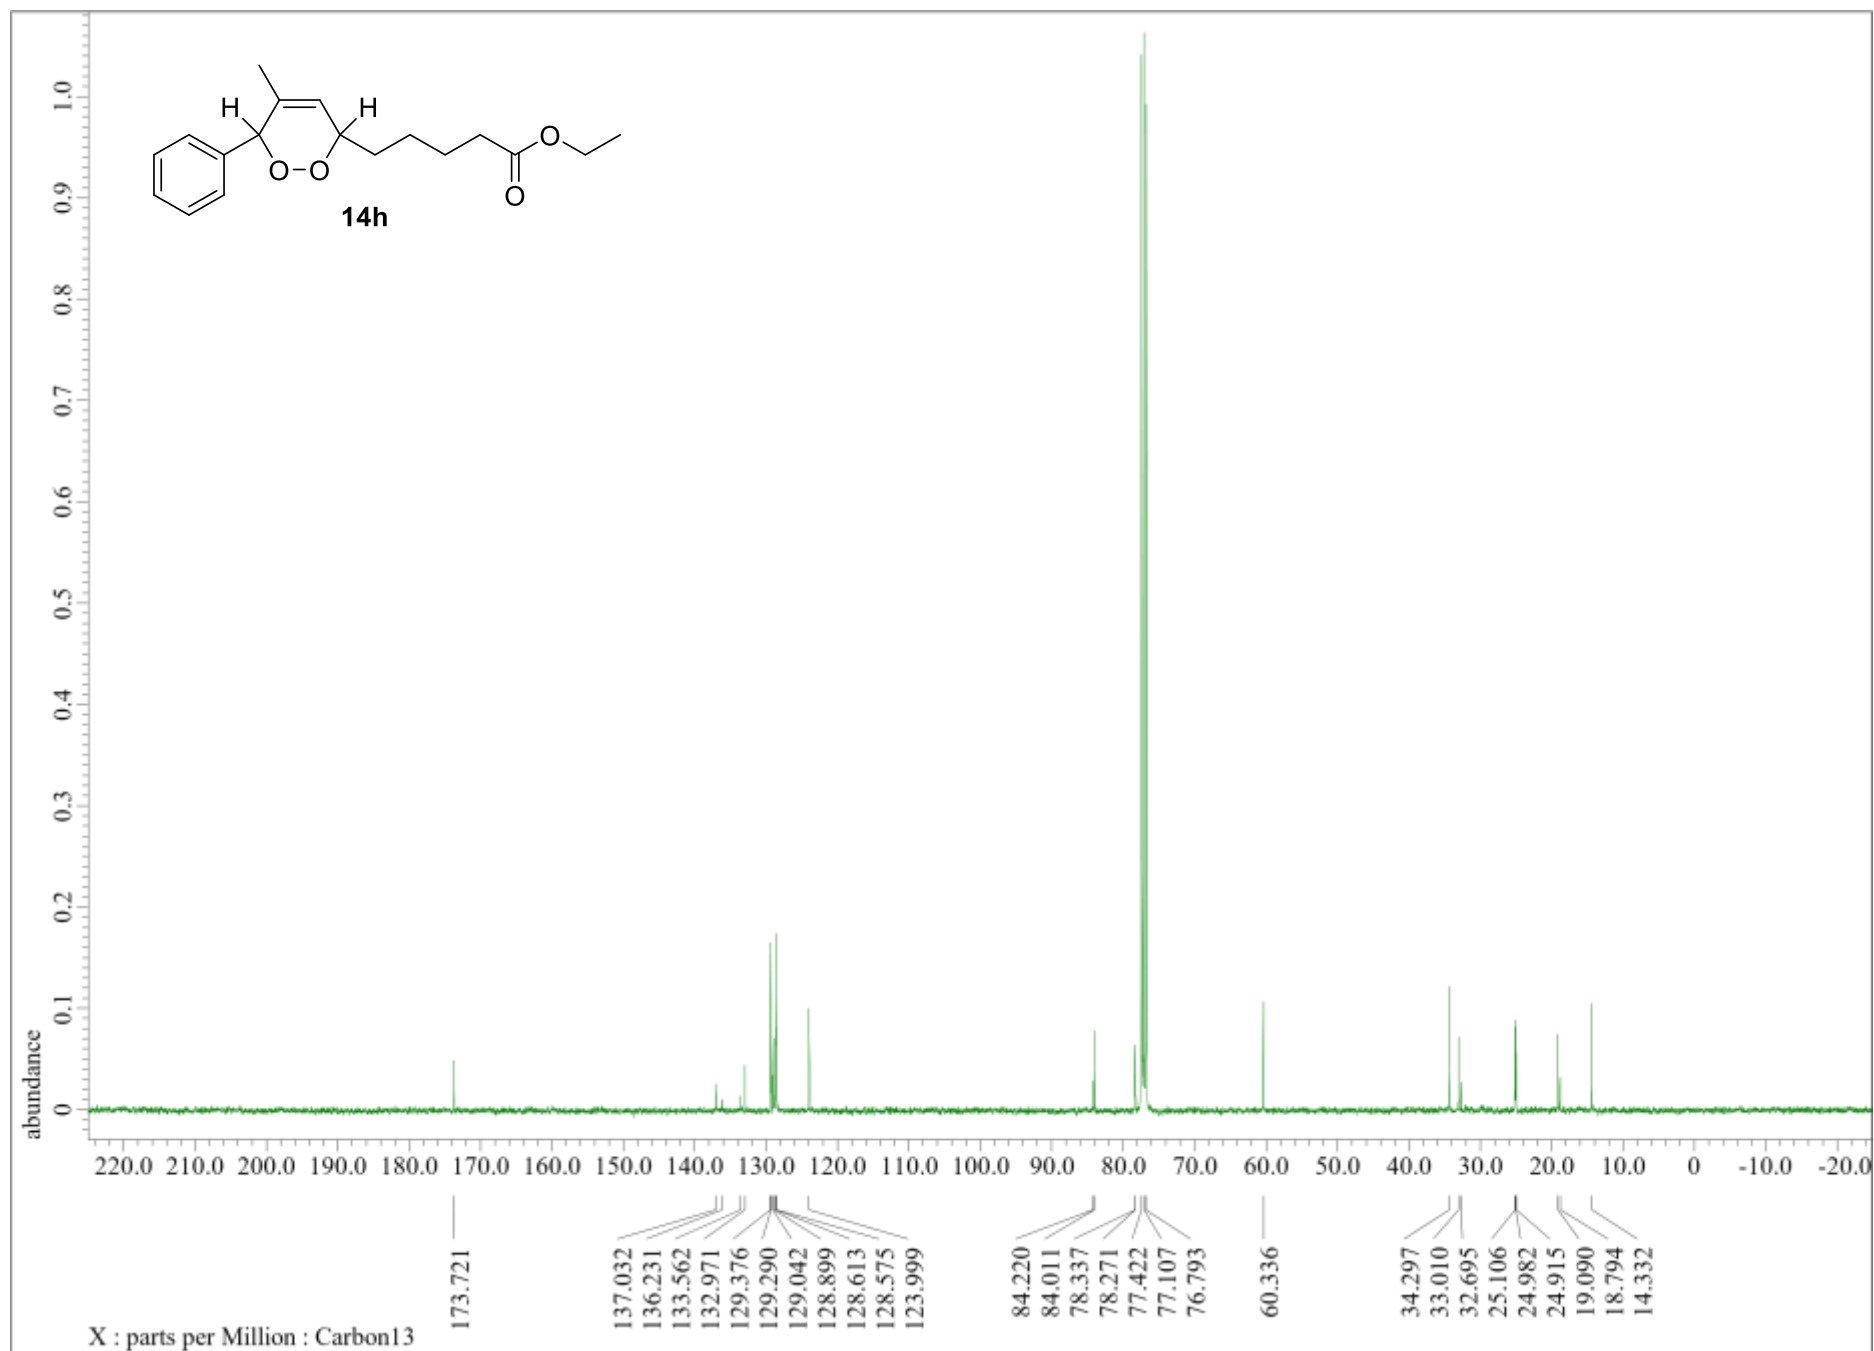

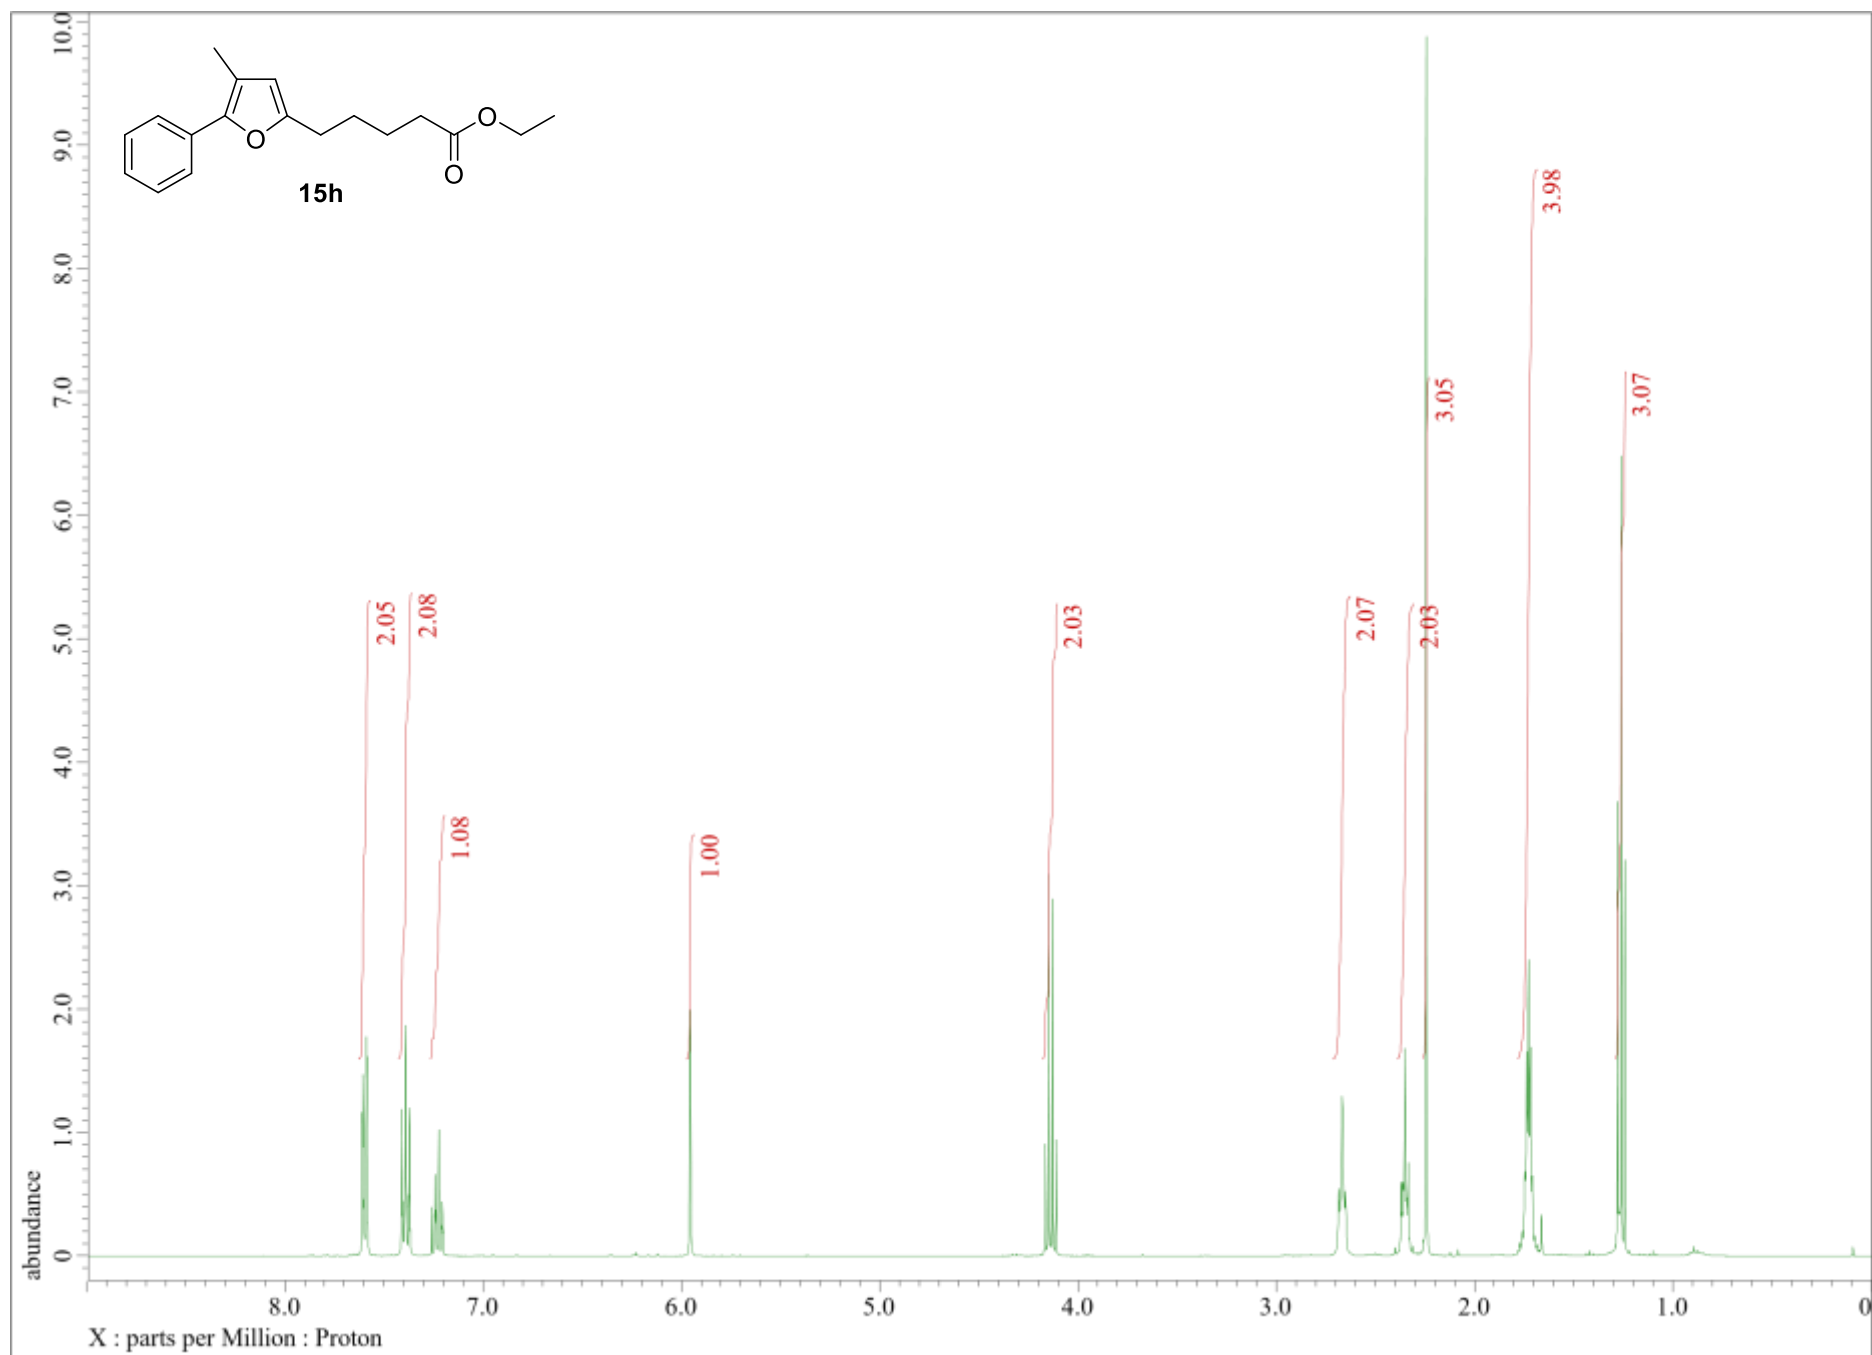

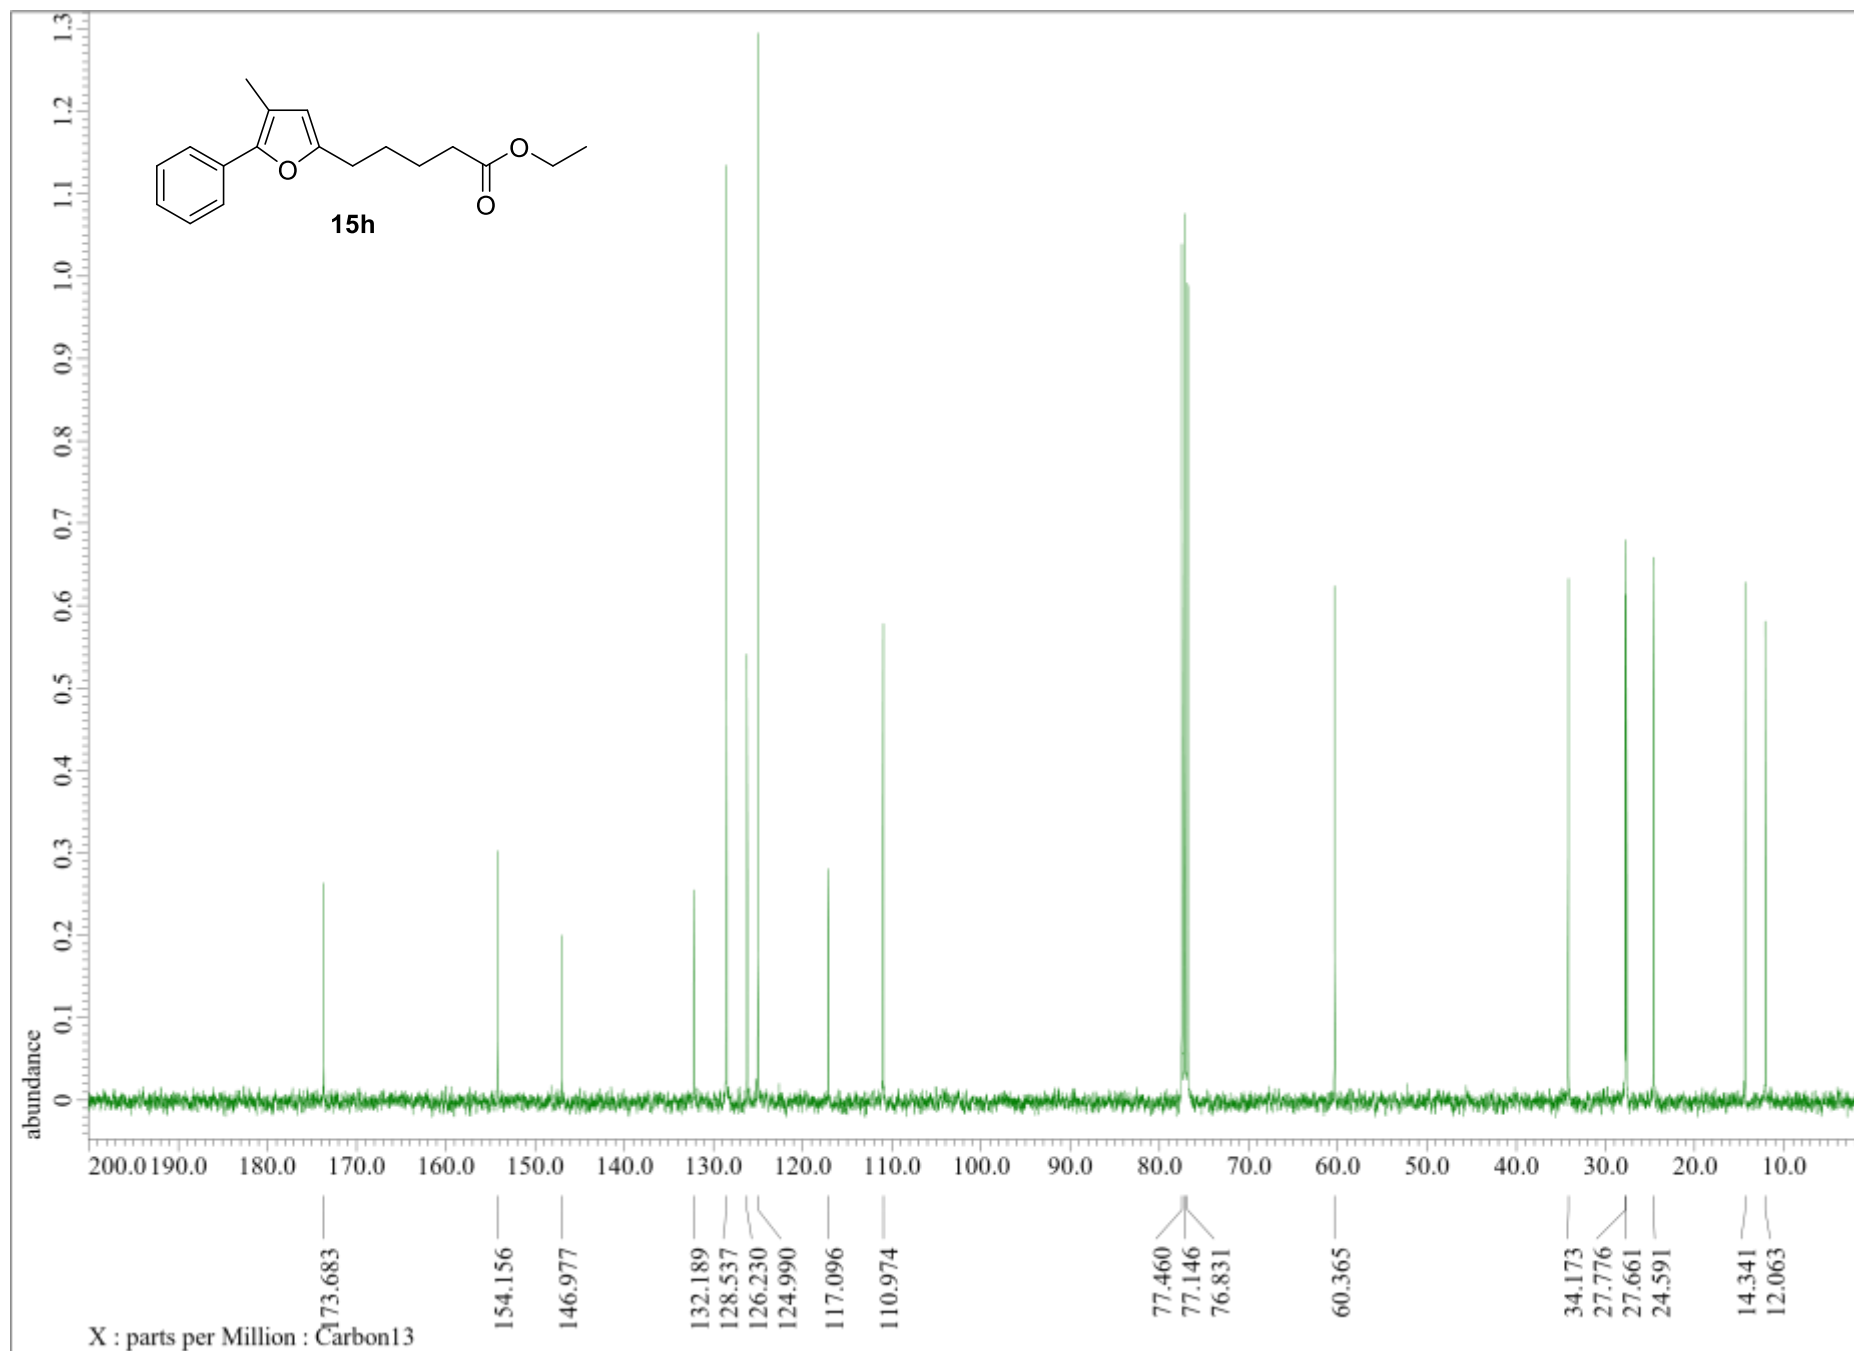



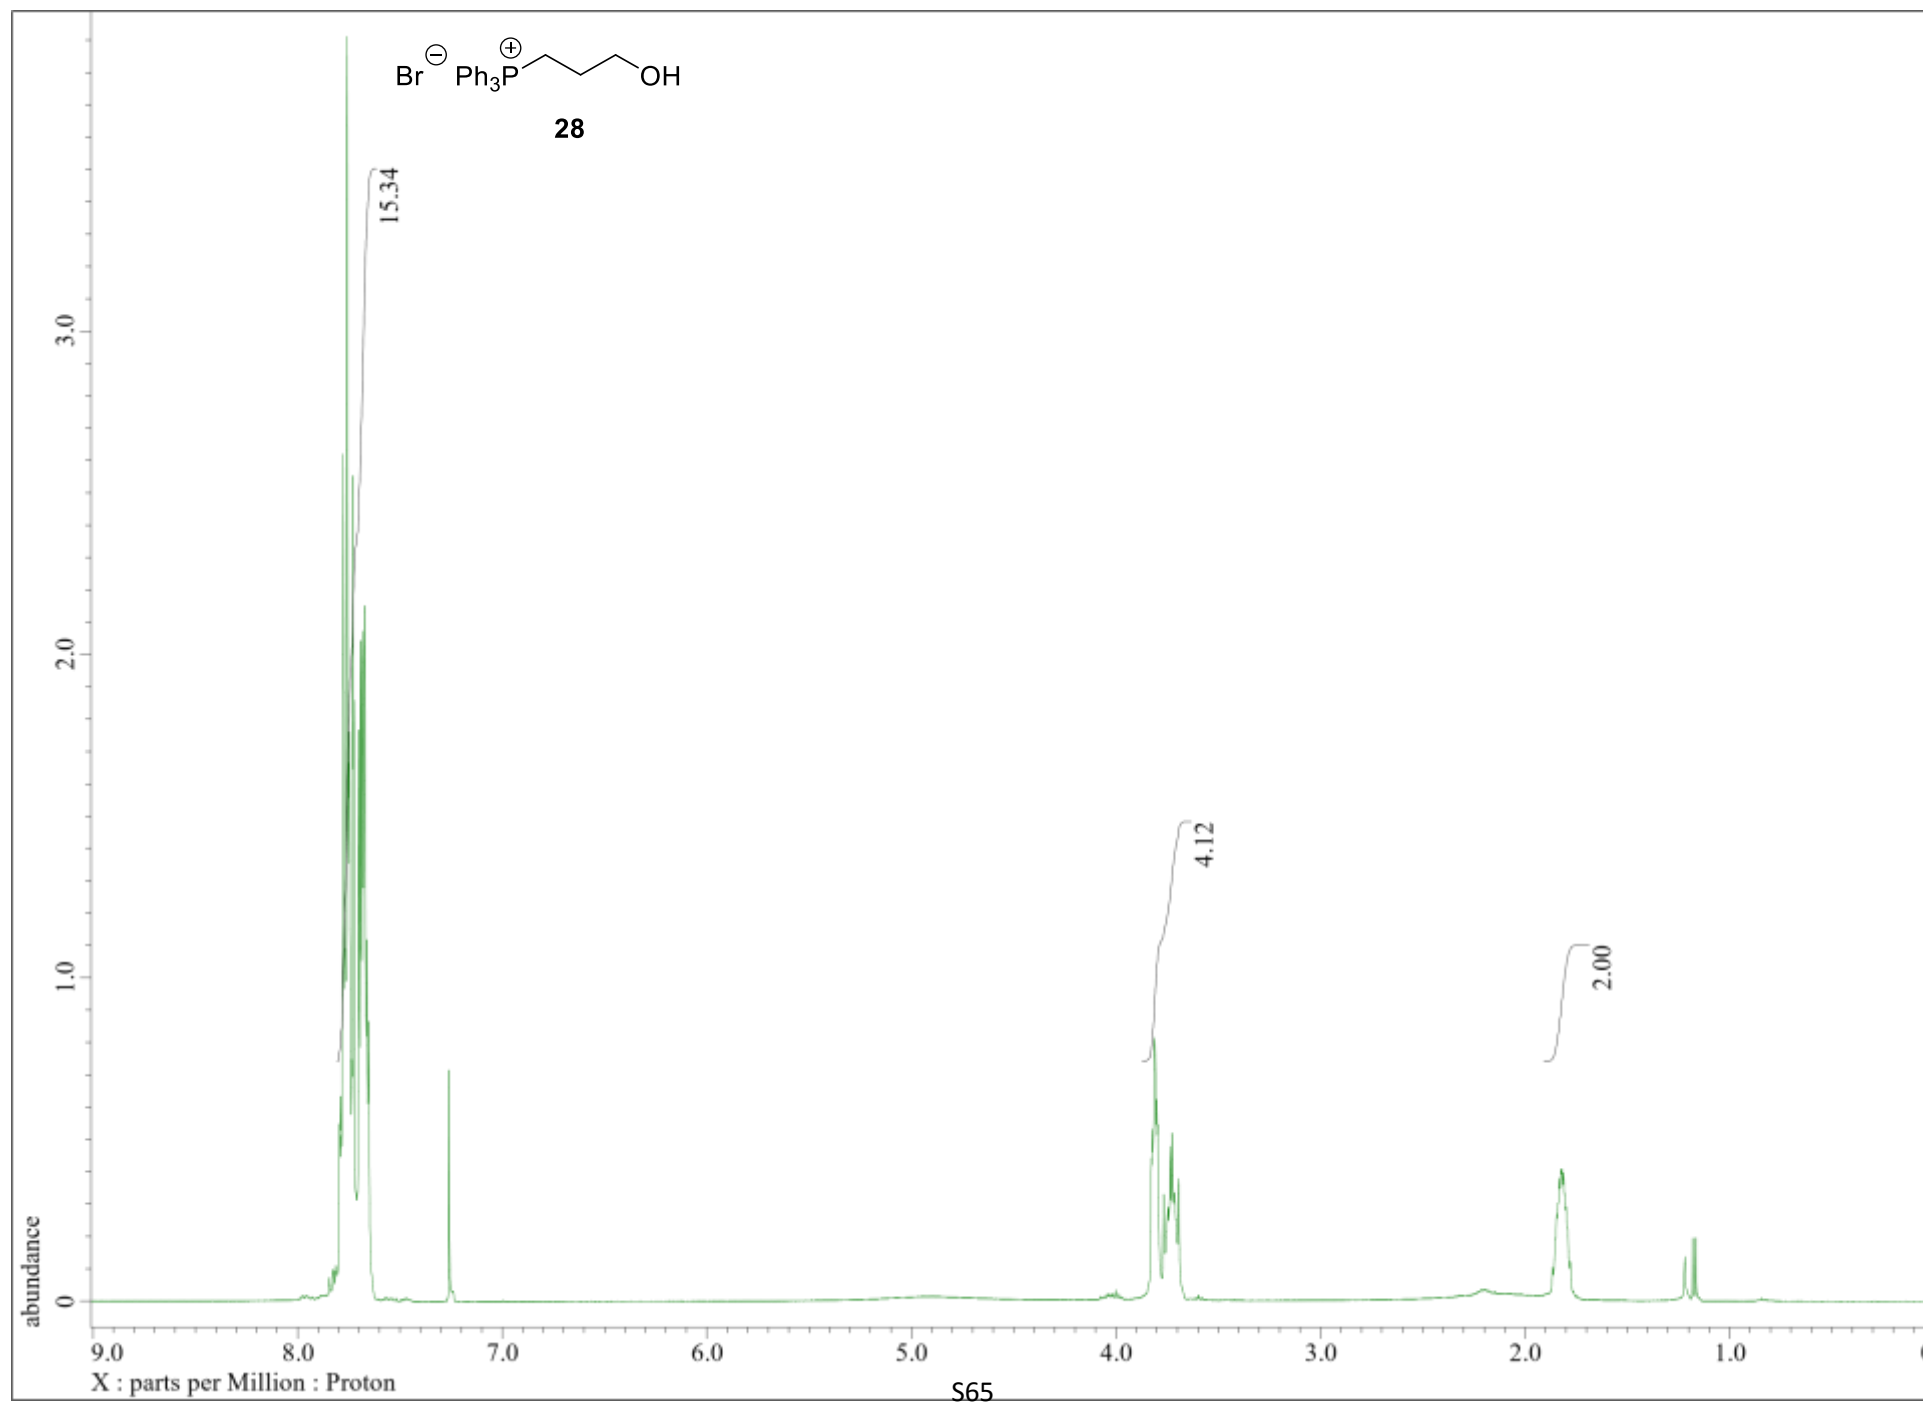

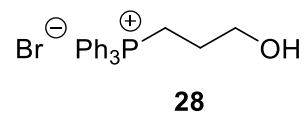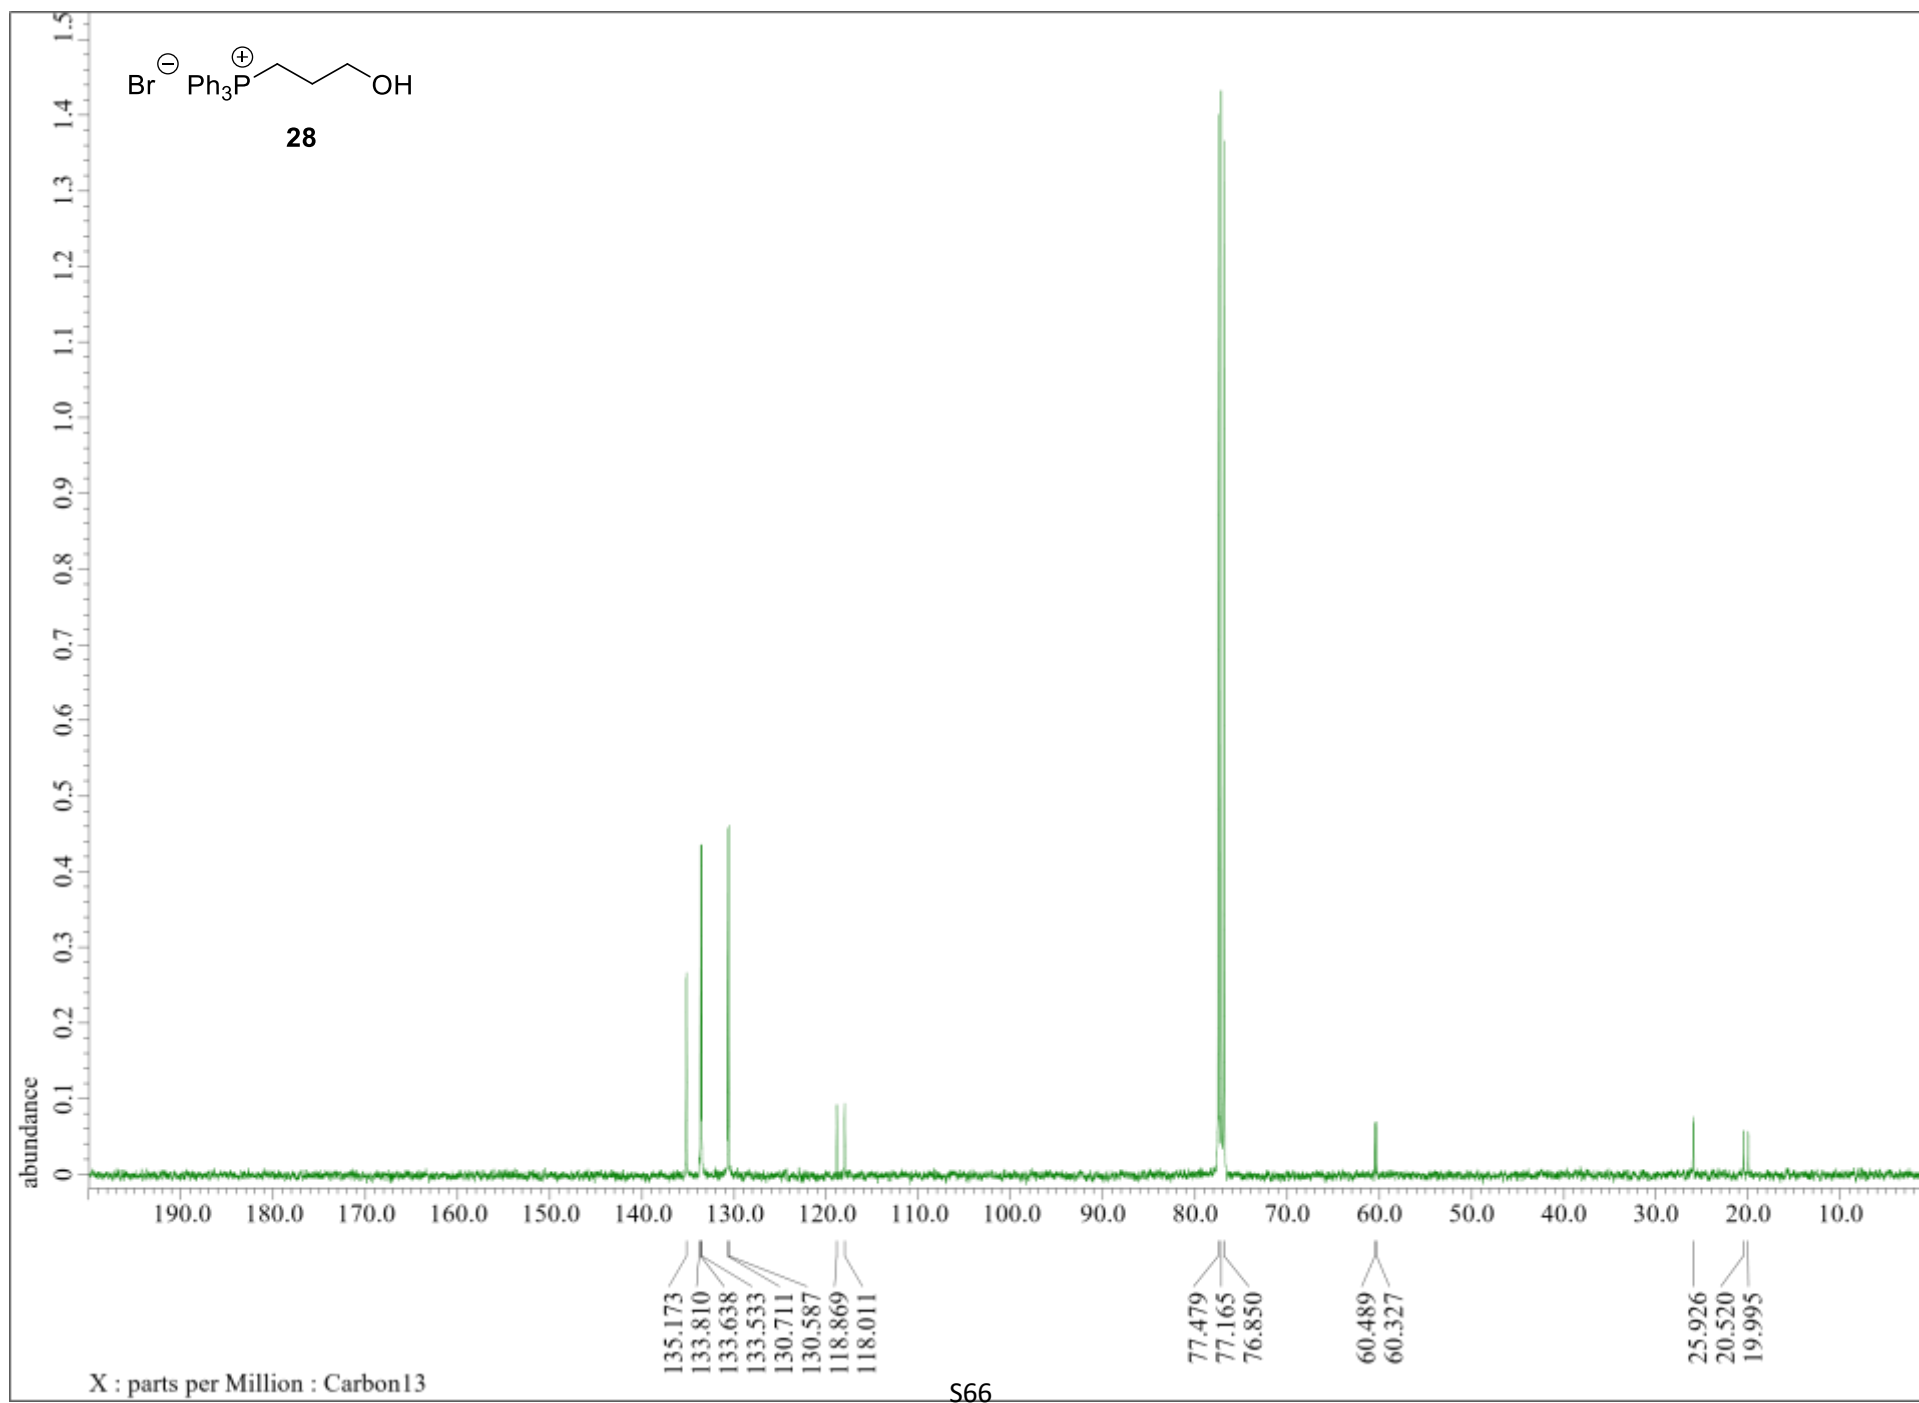

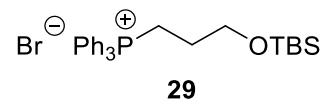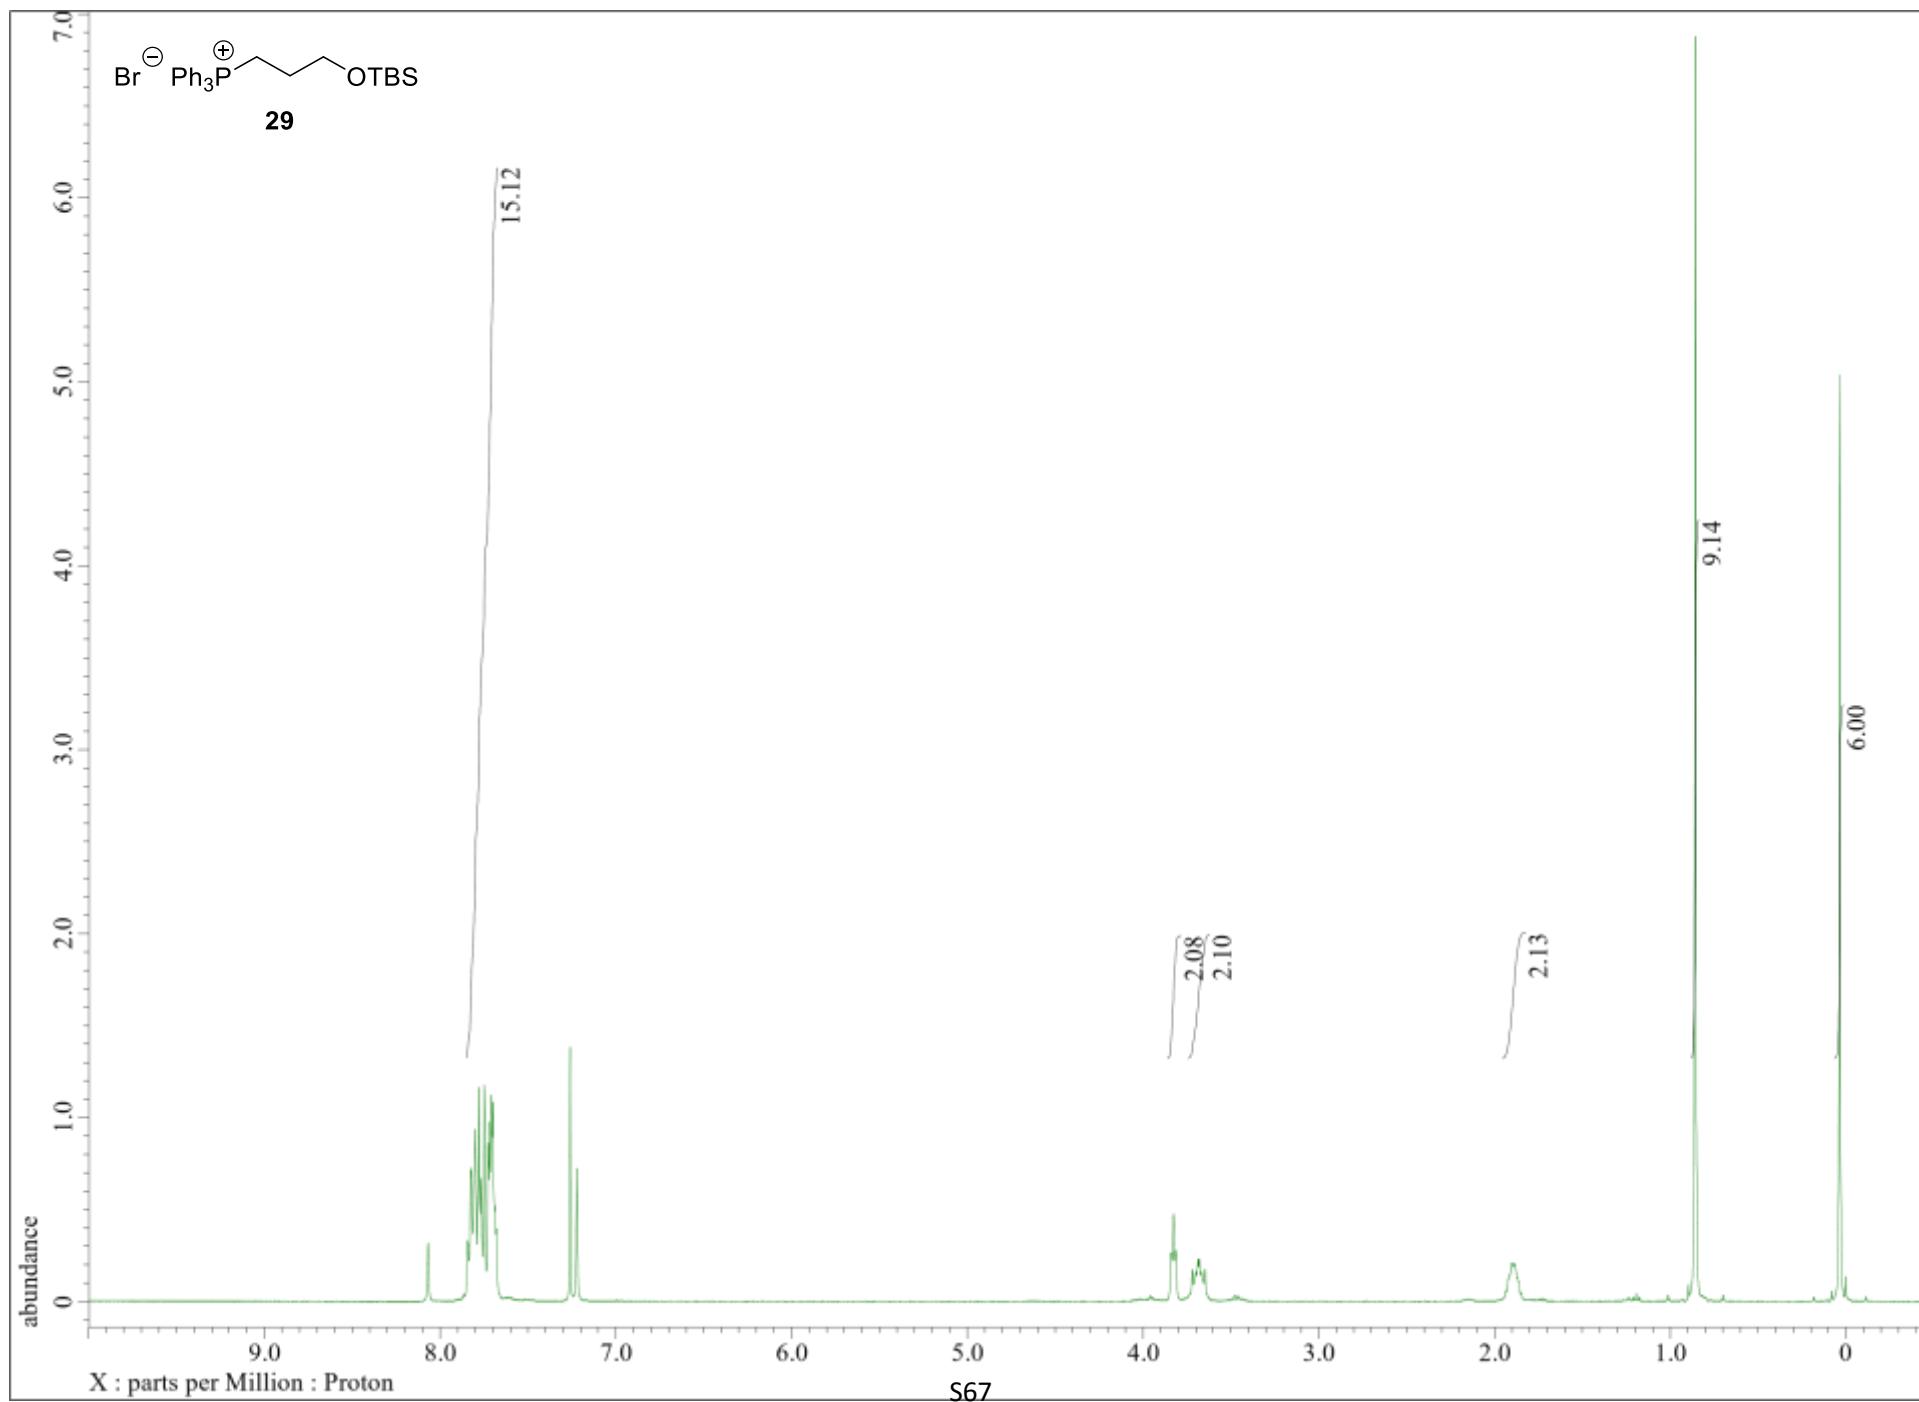

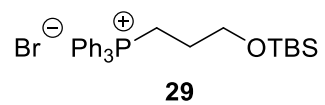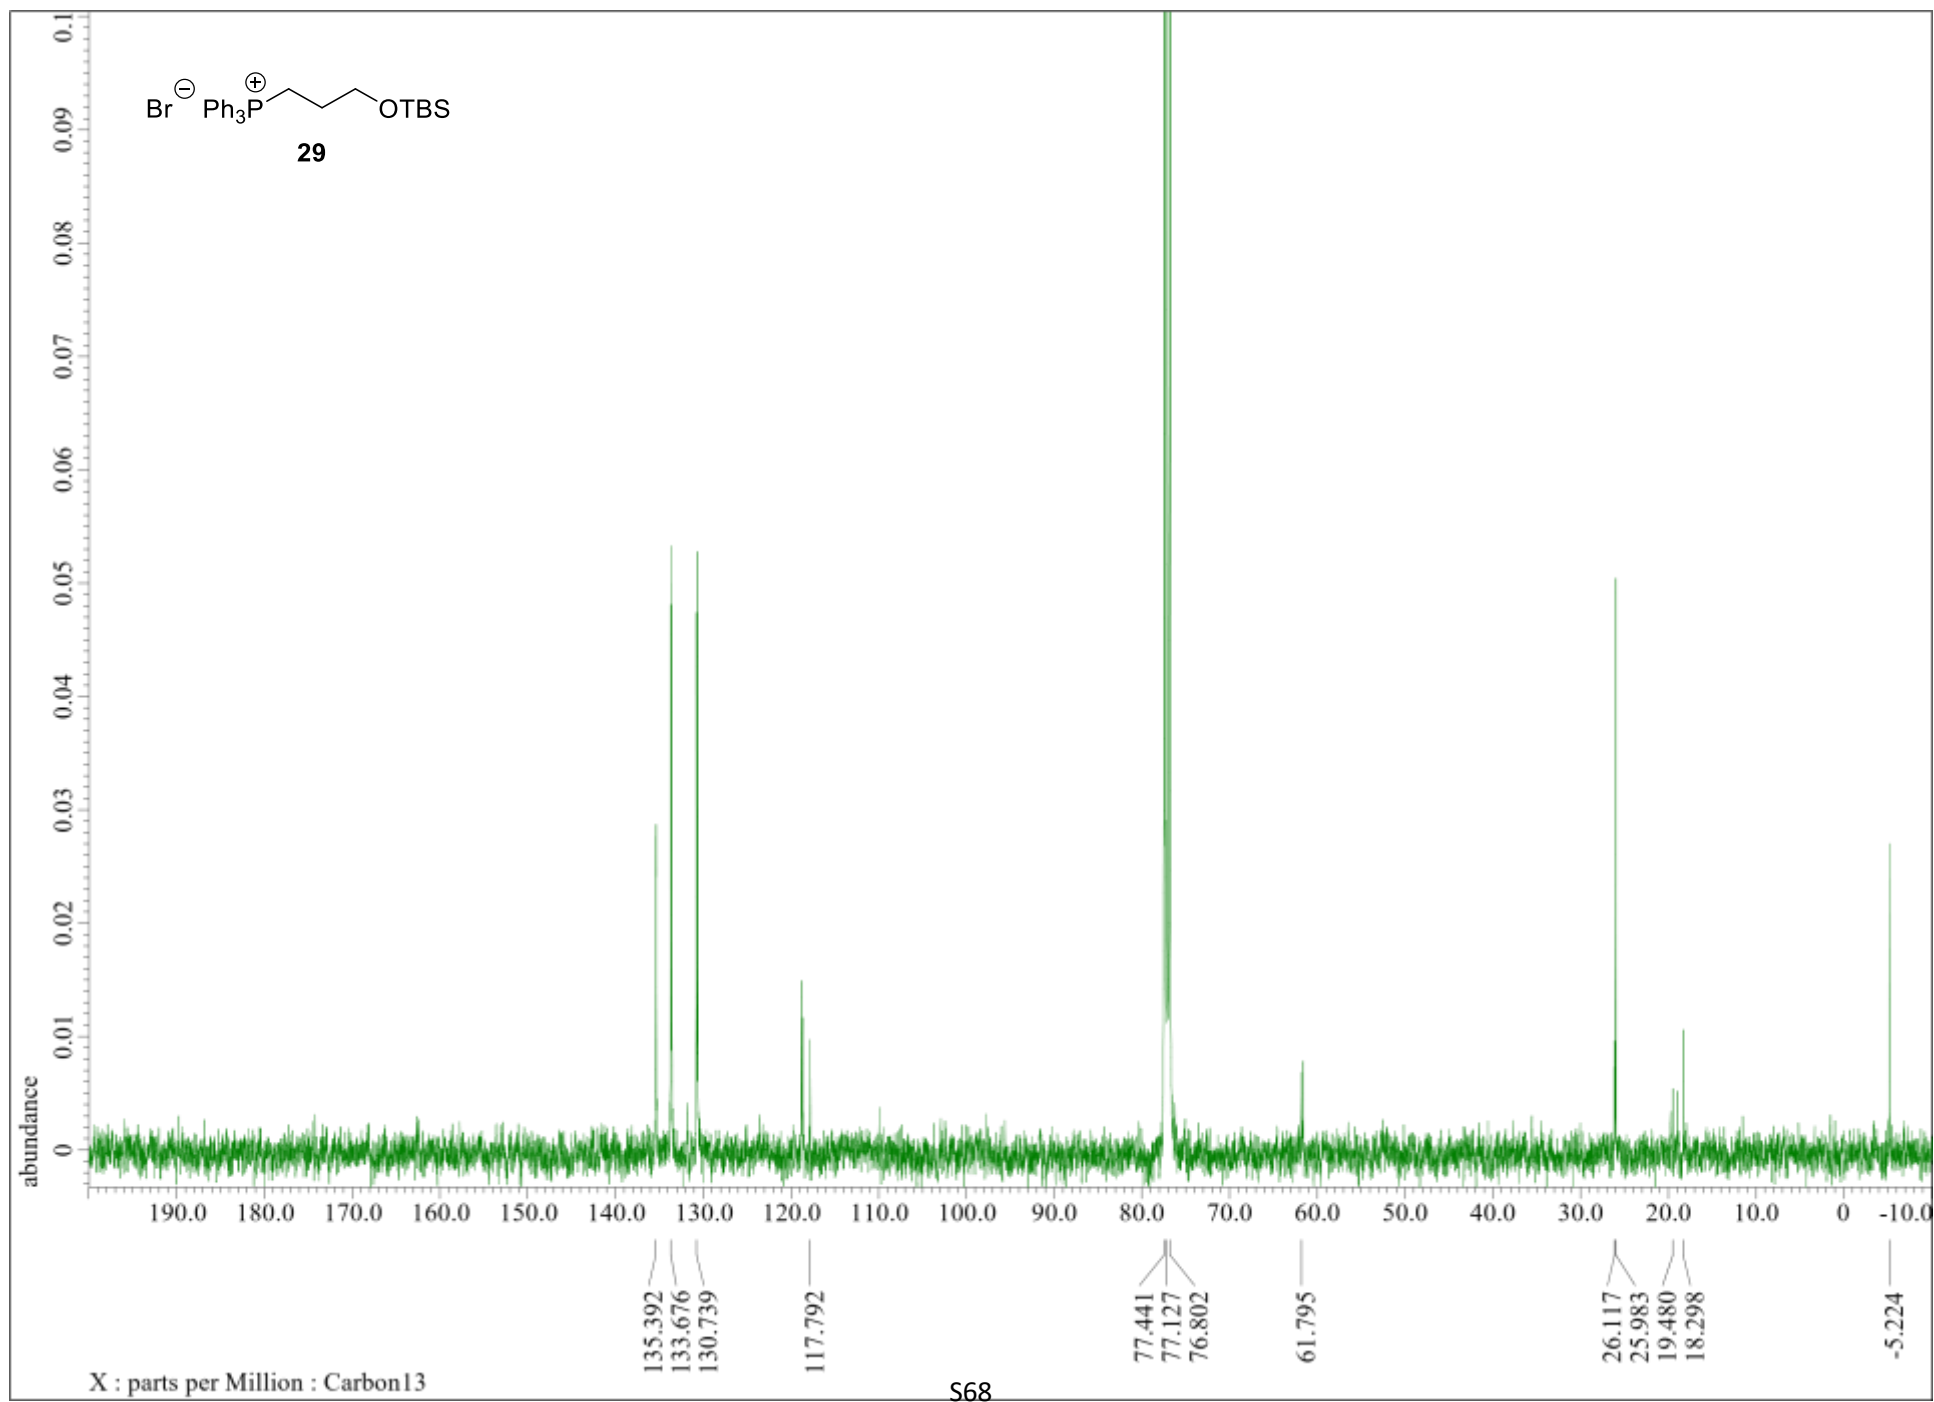

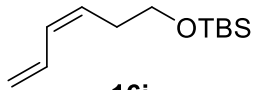

**16i**

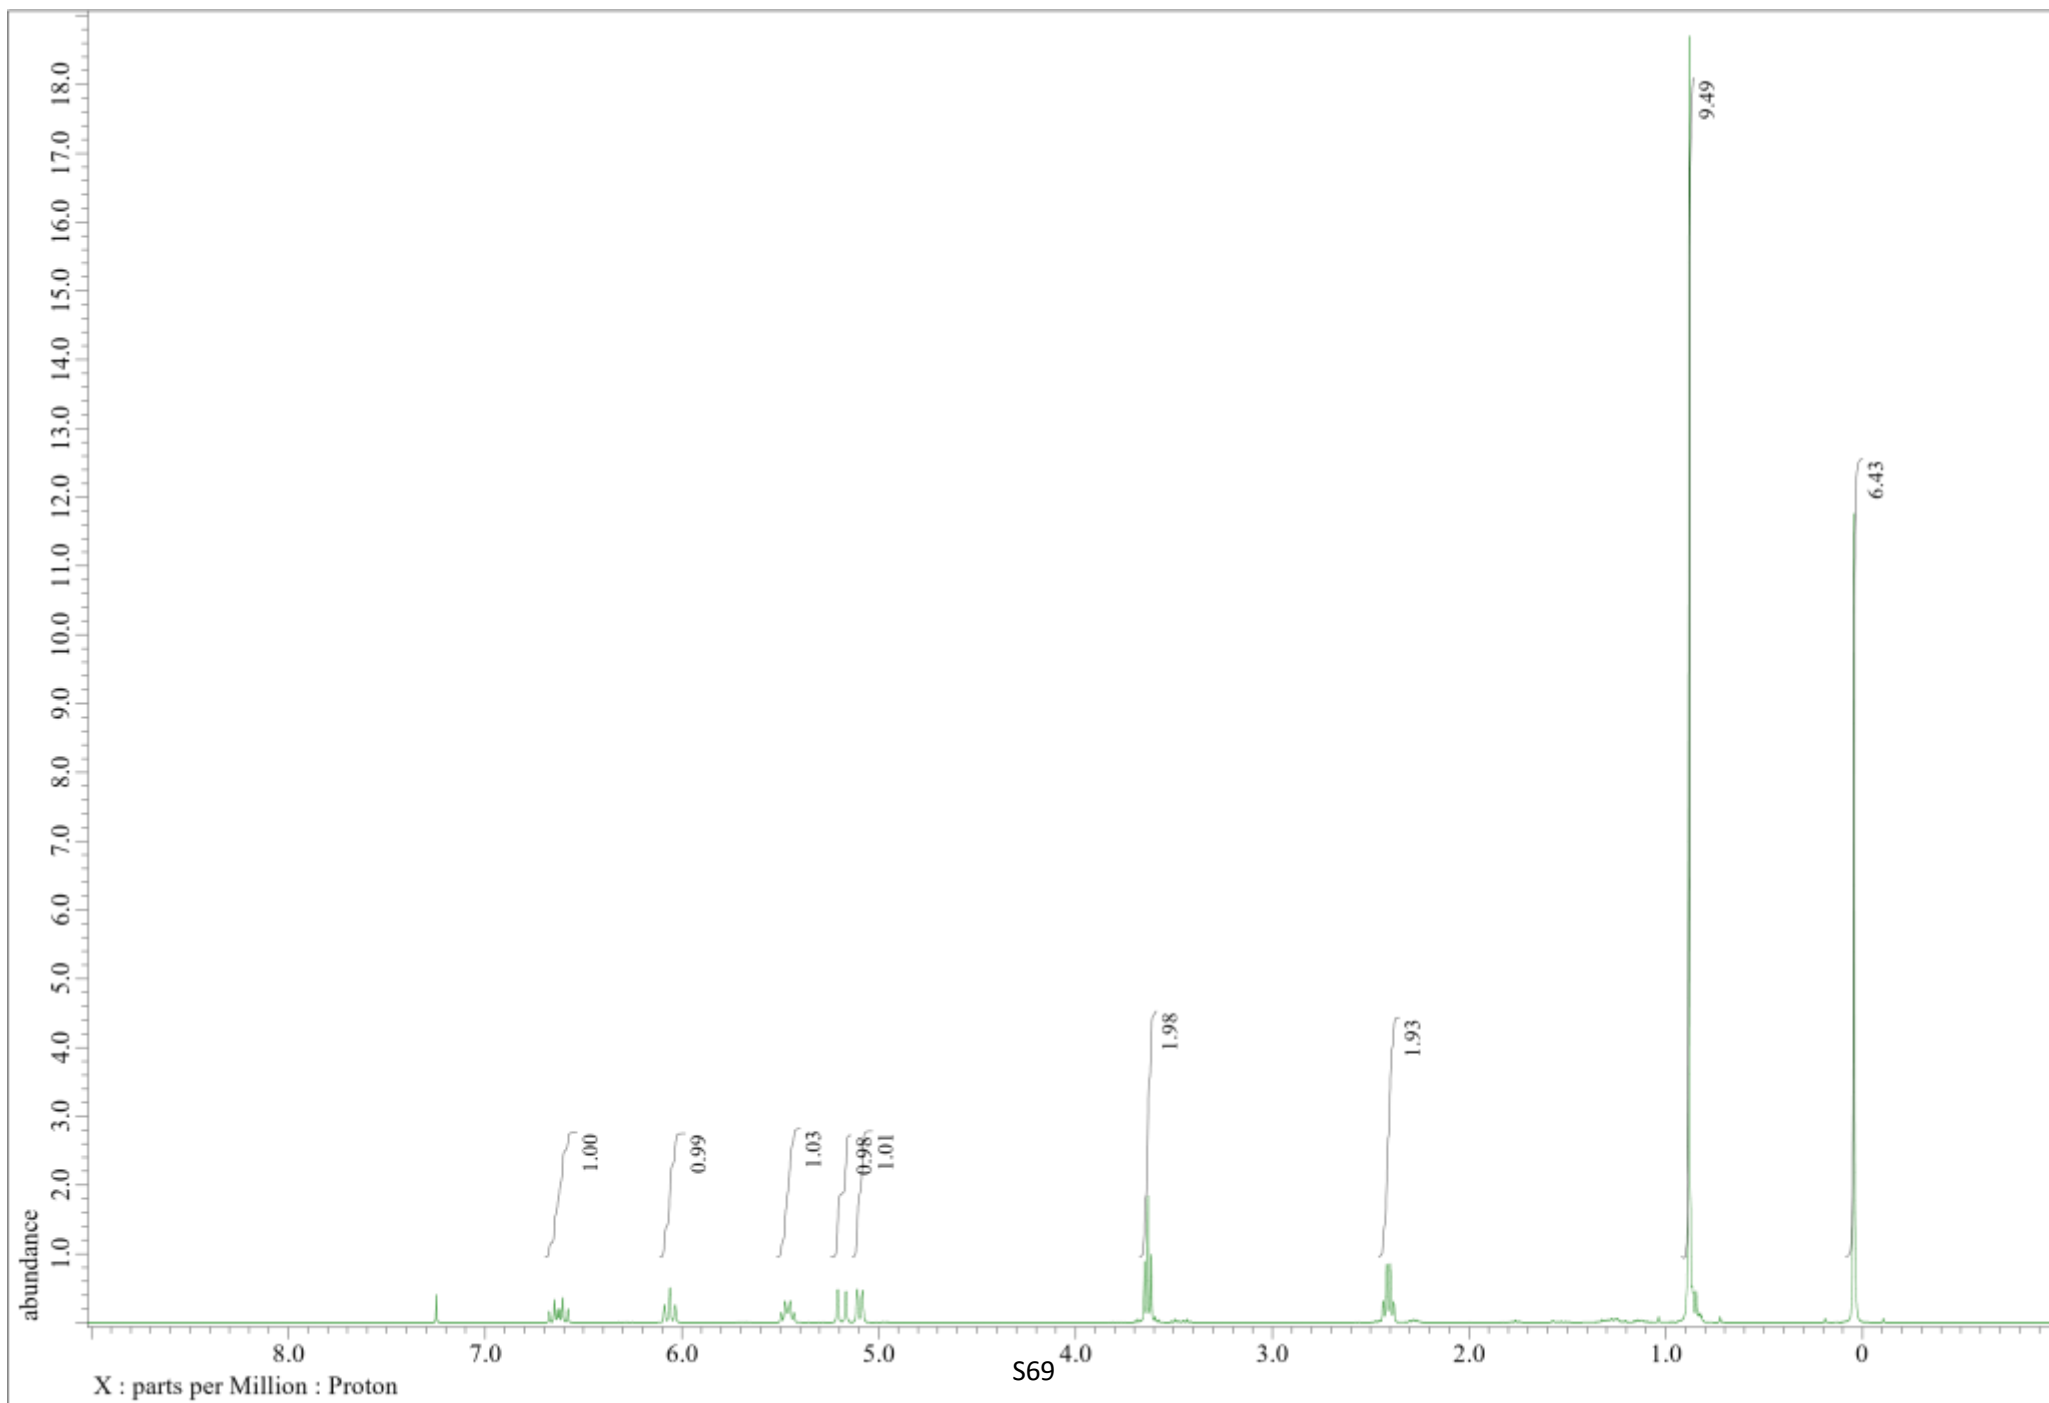

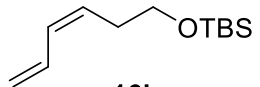

16i

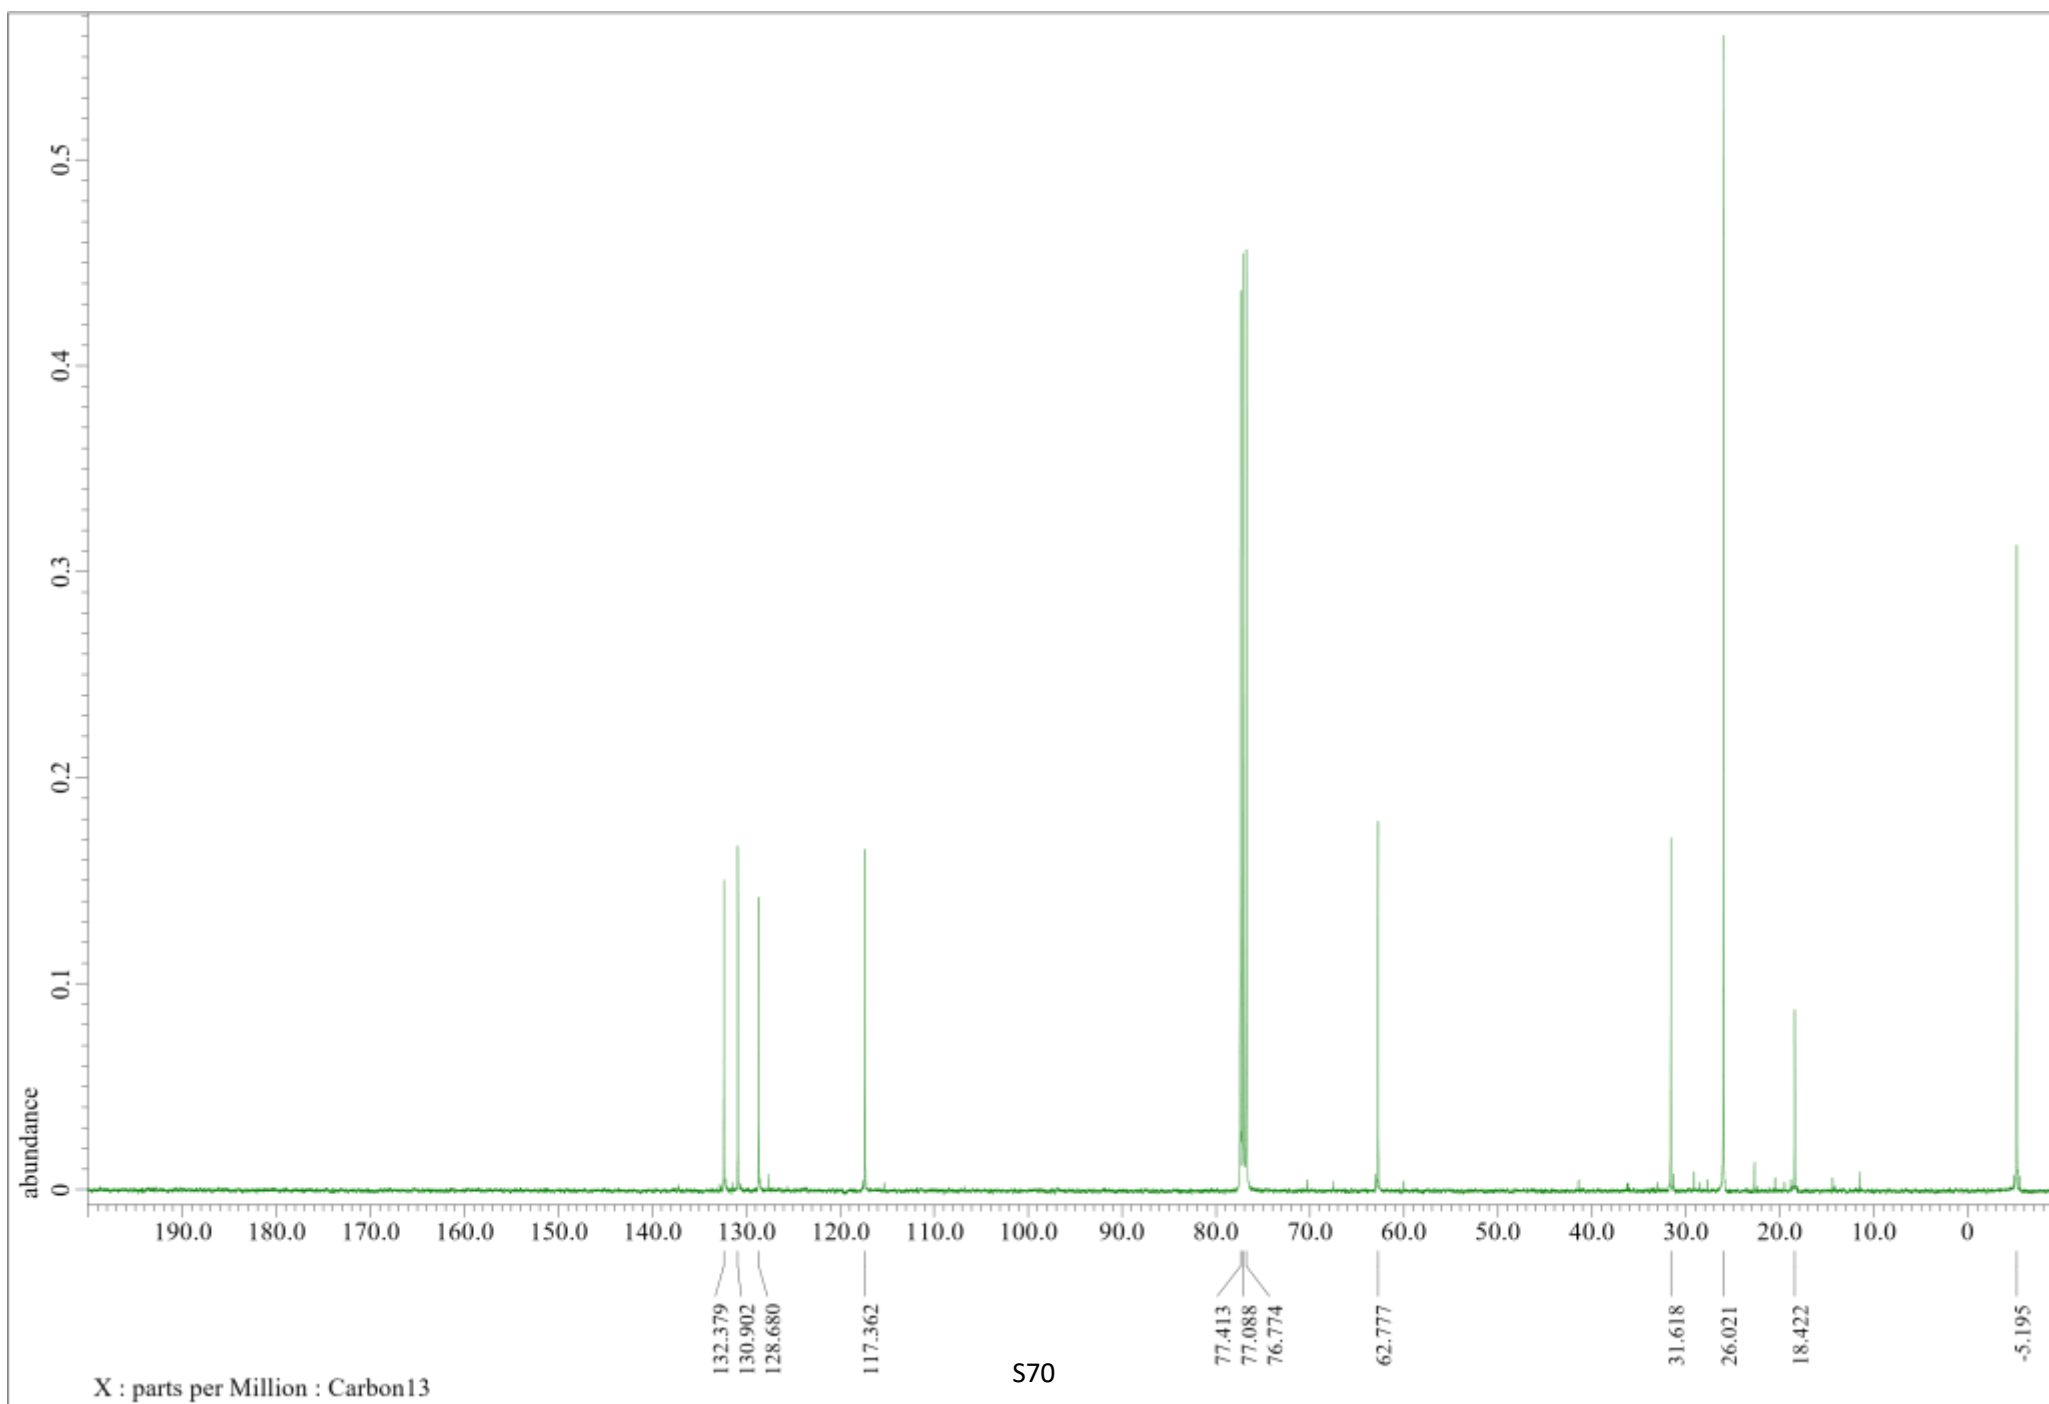

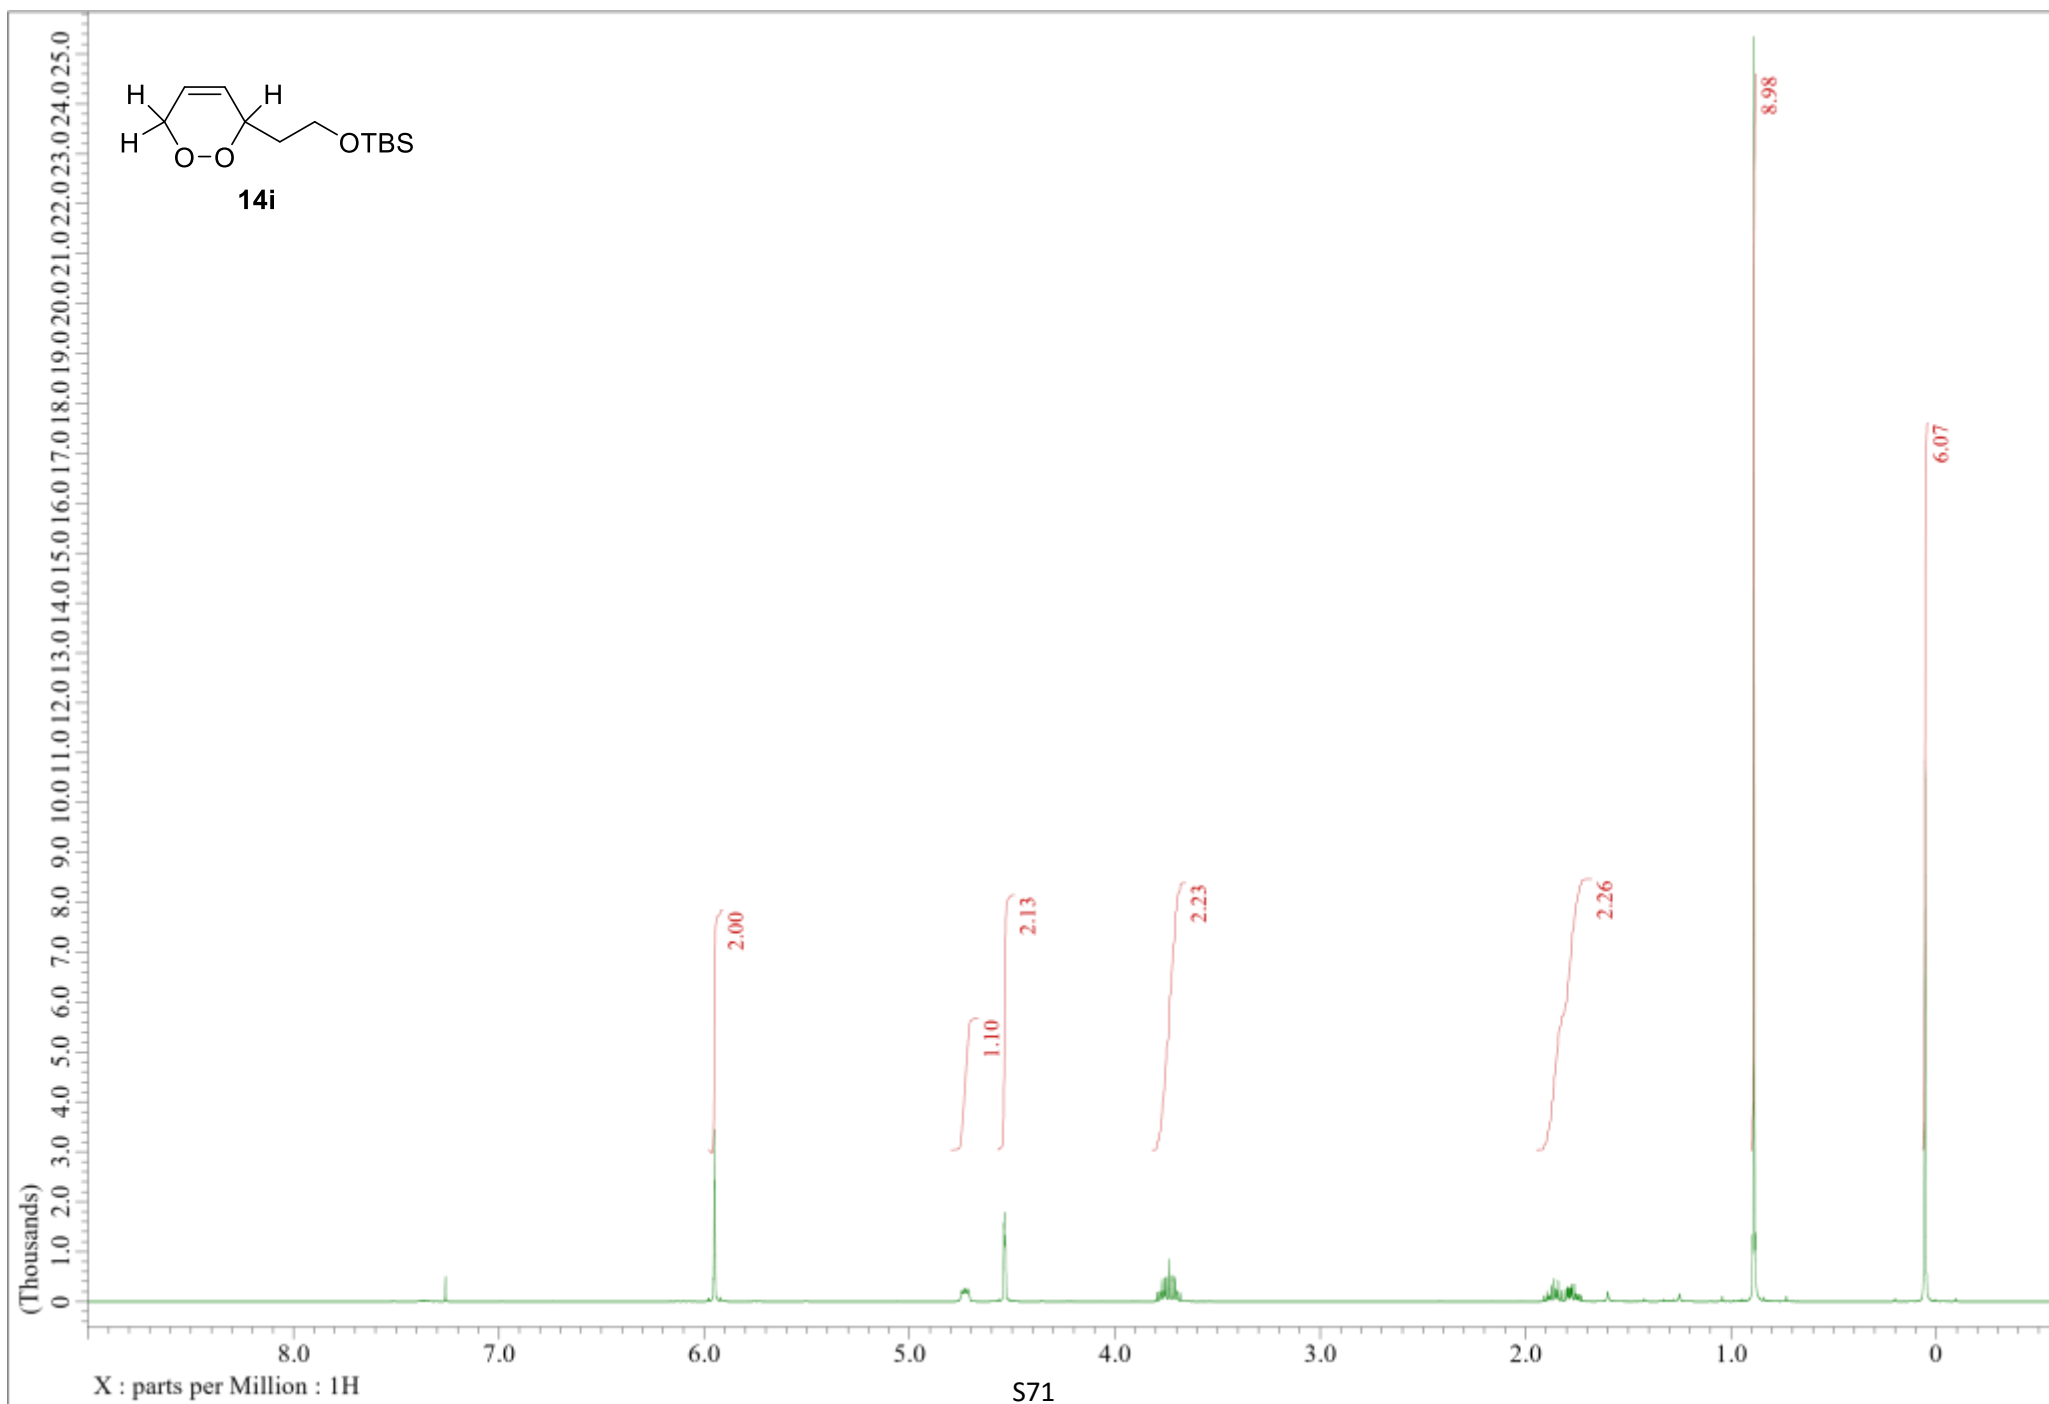

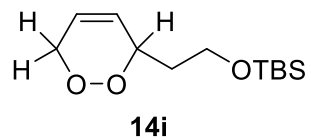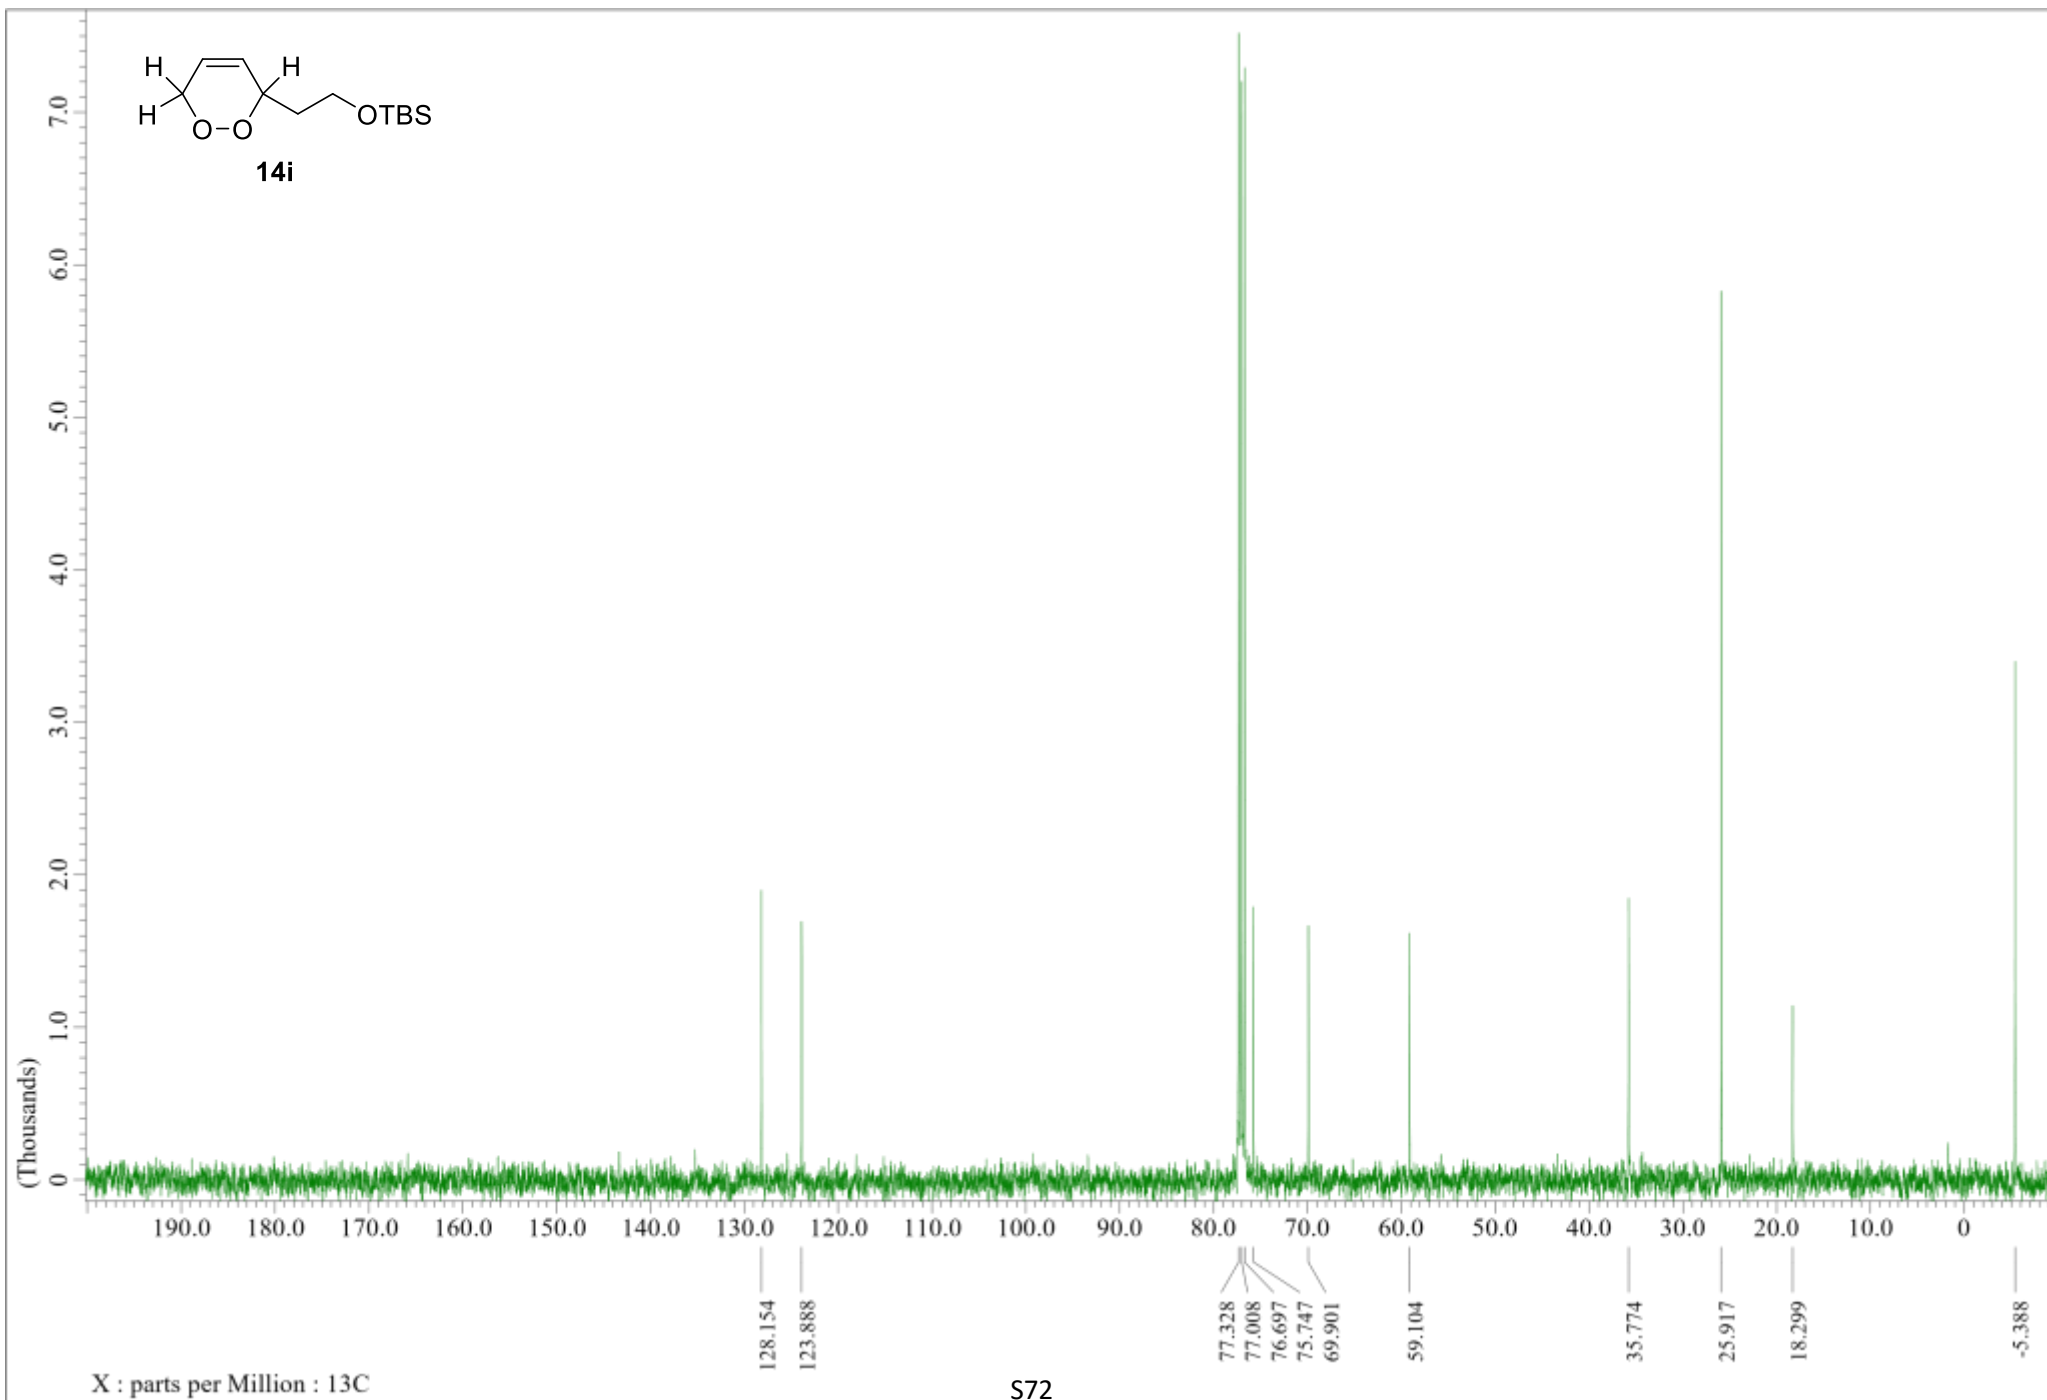



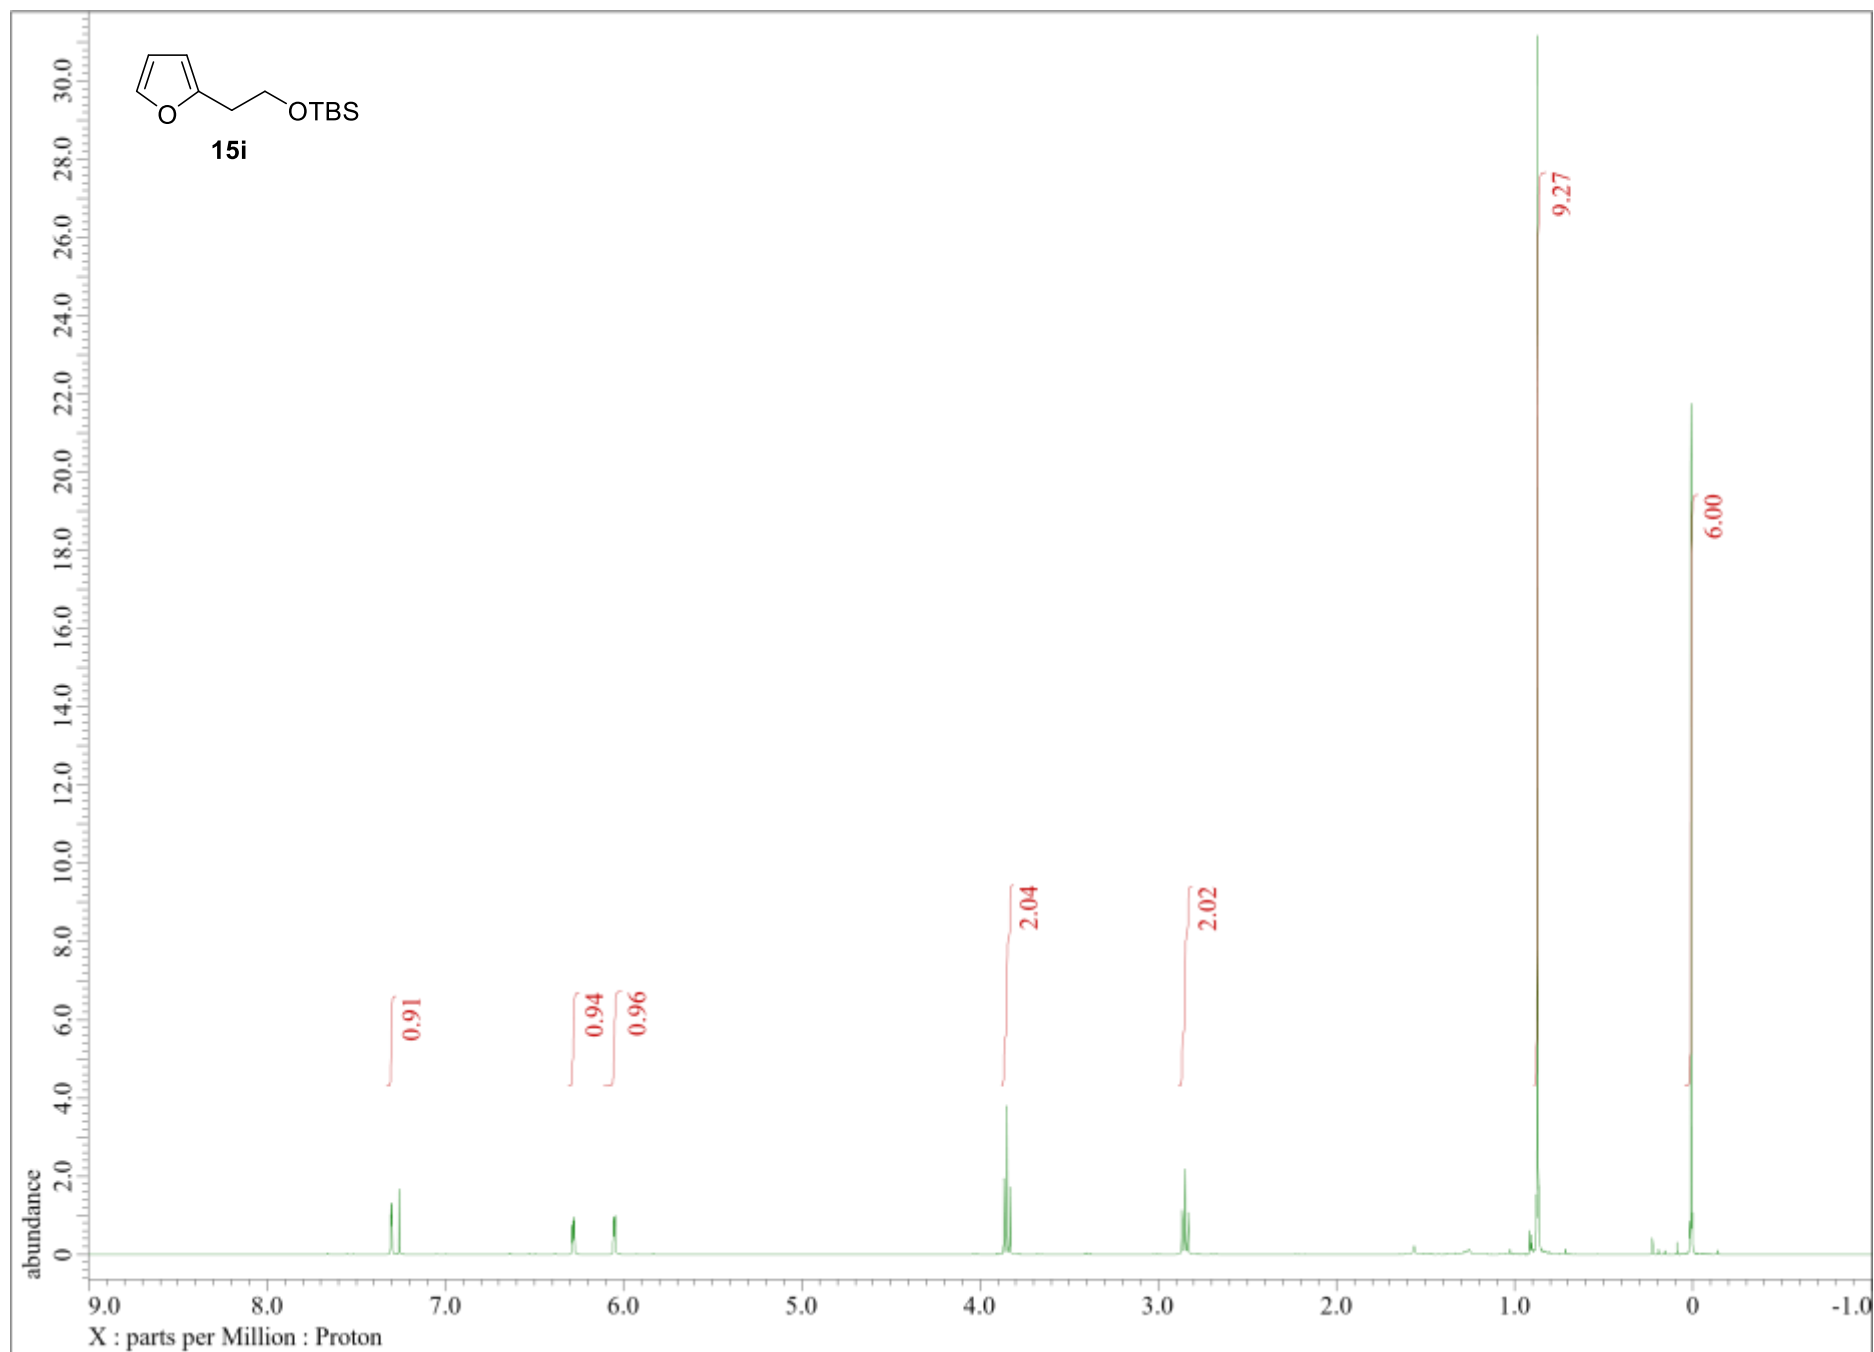

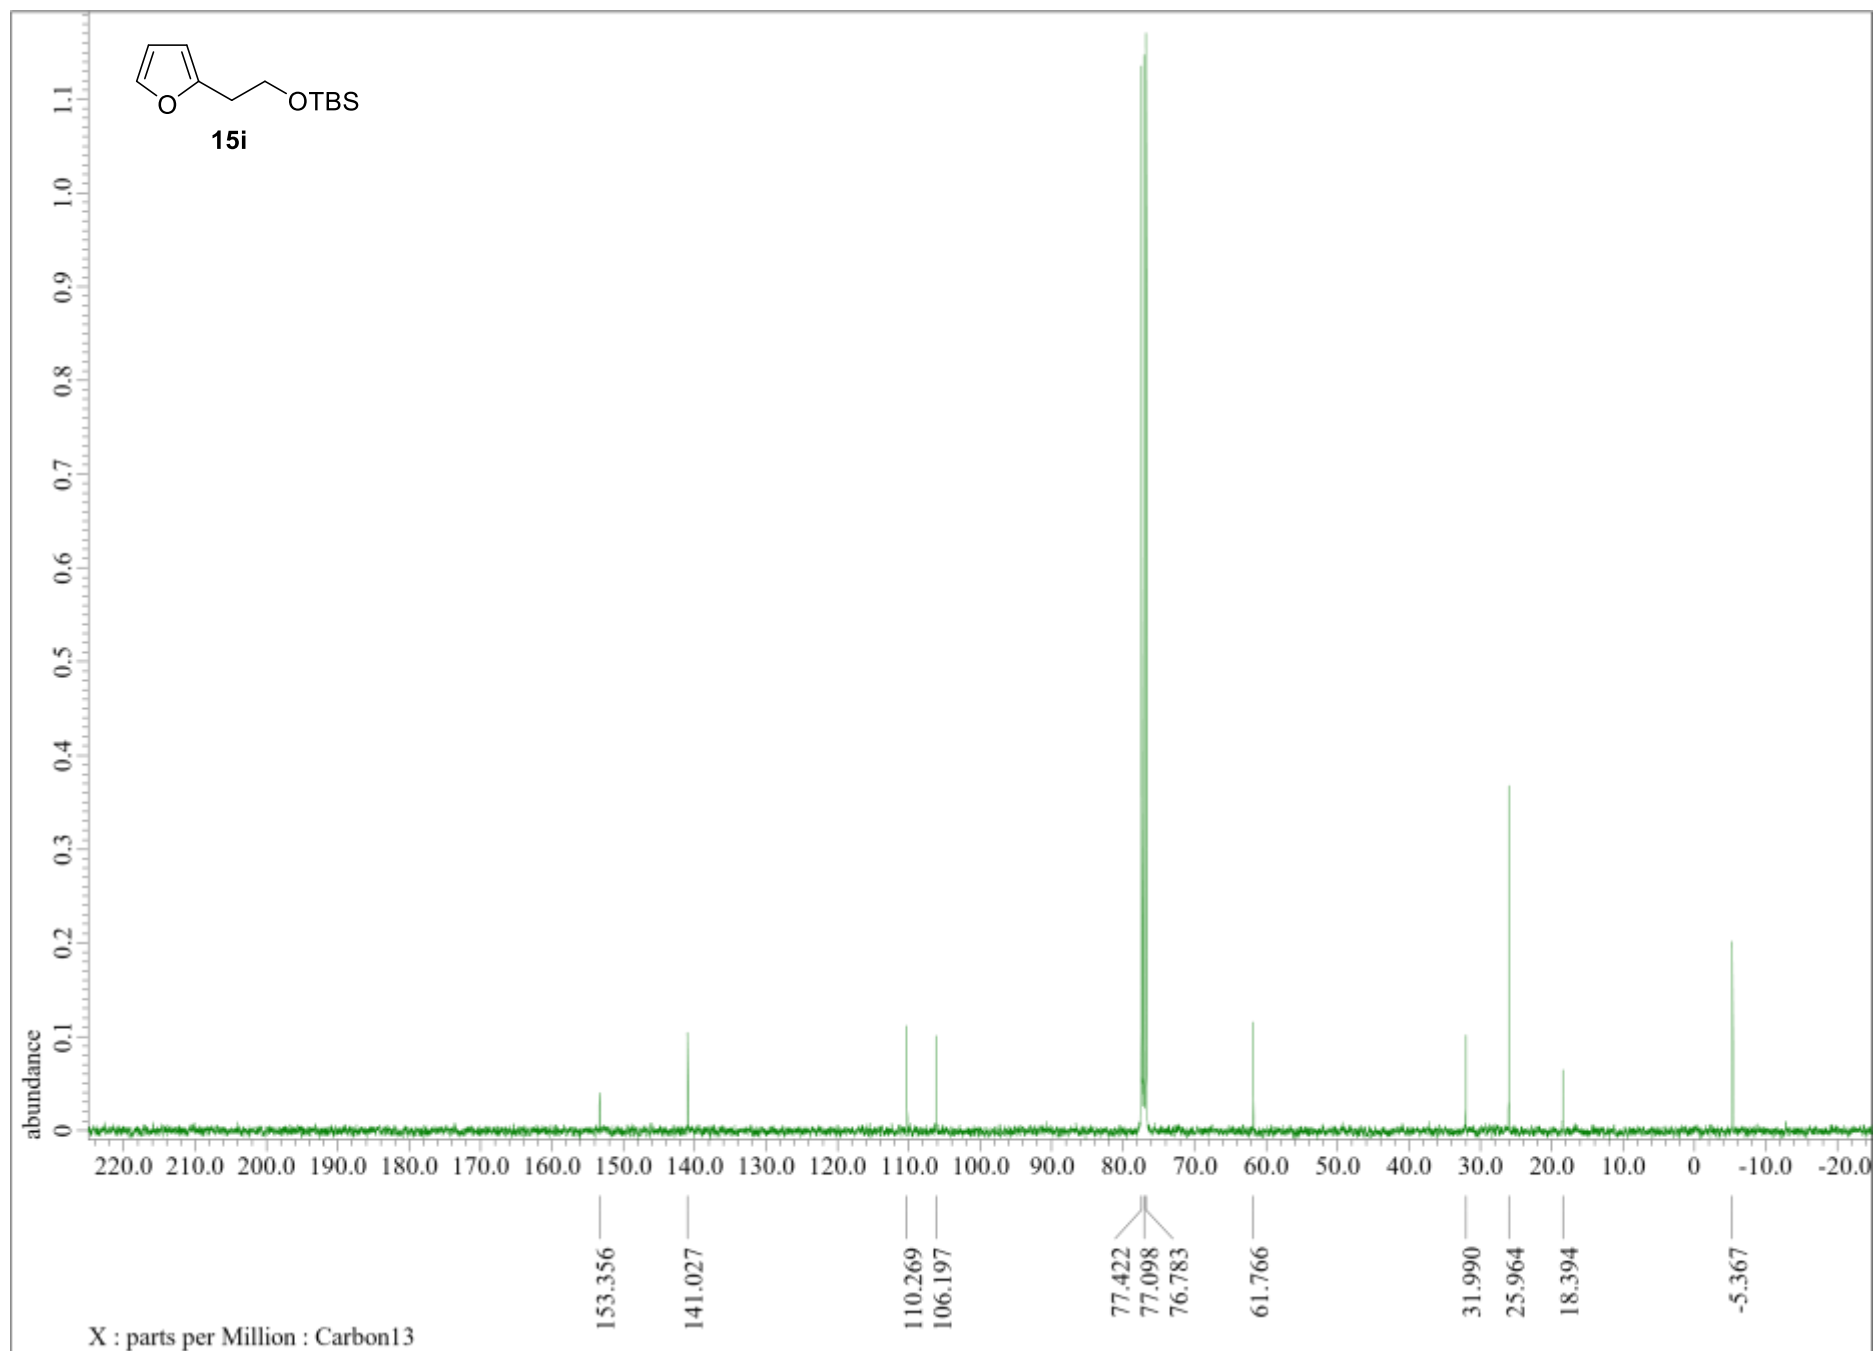

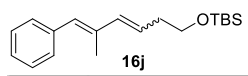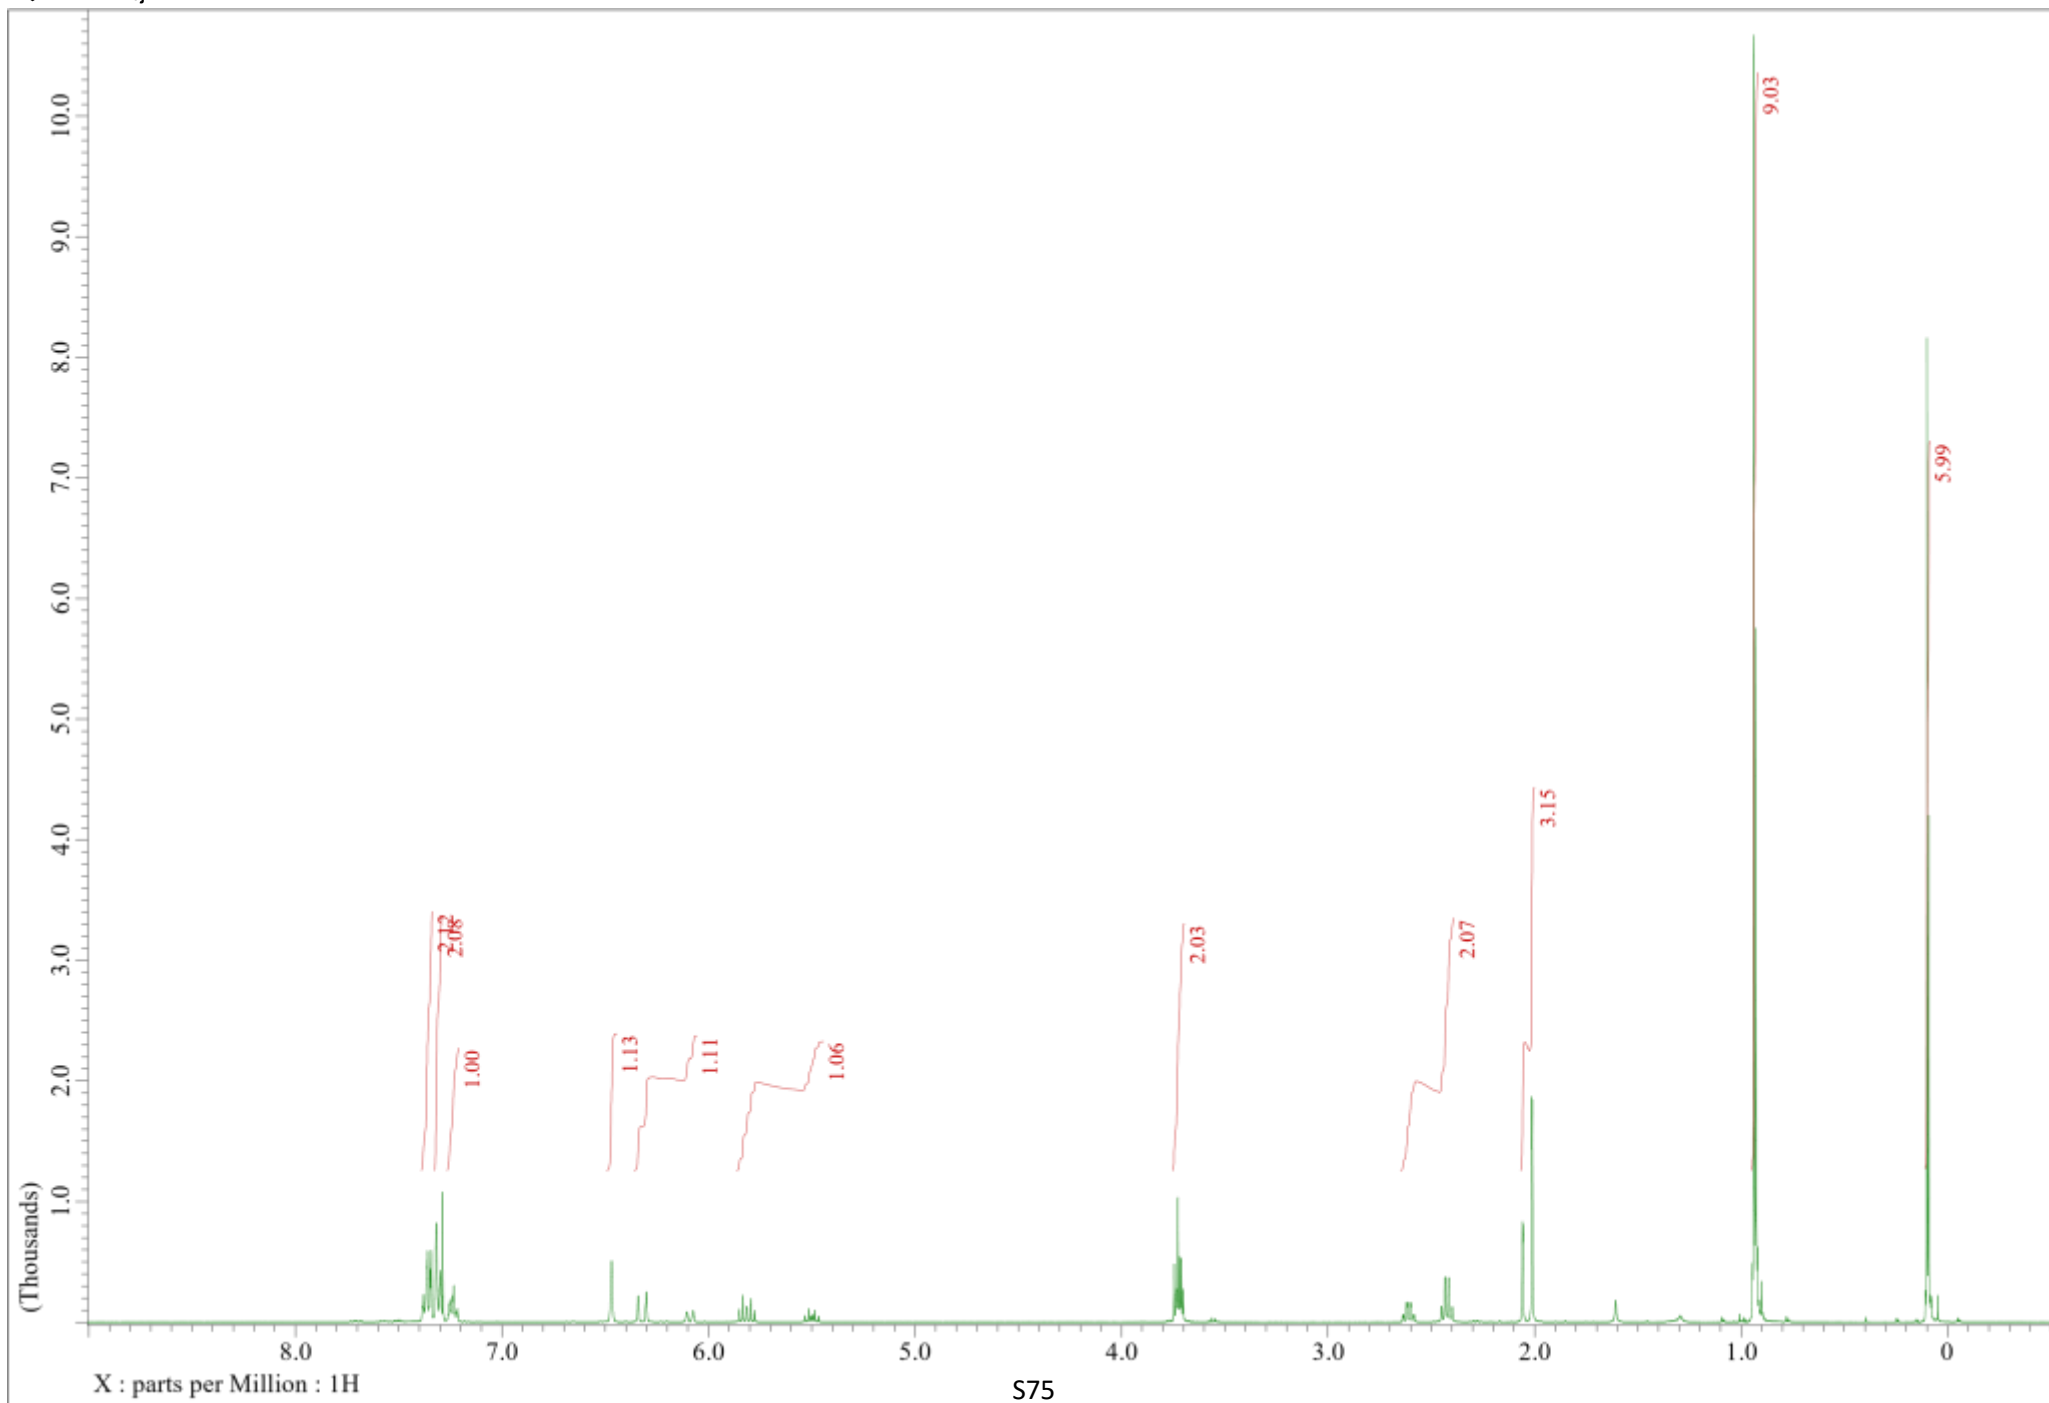

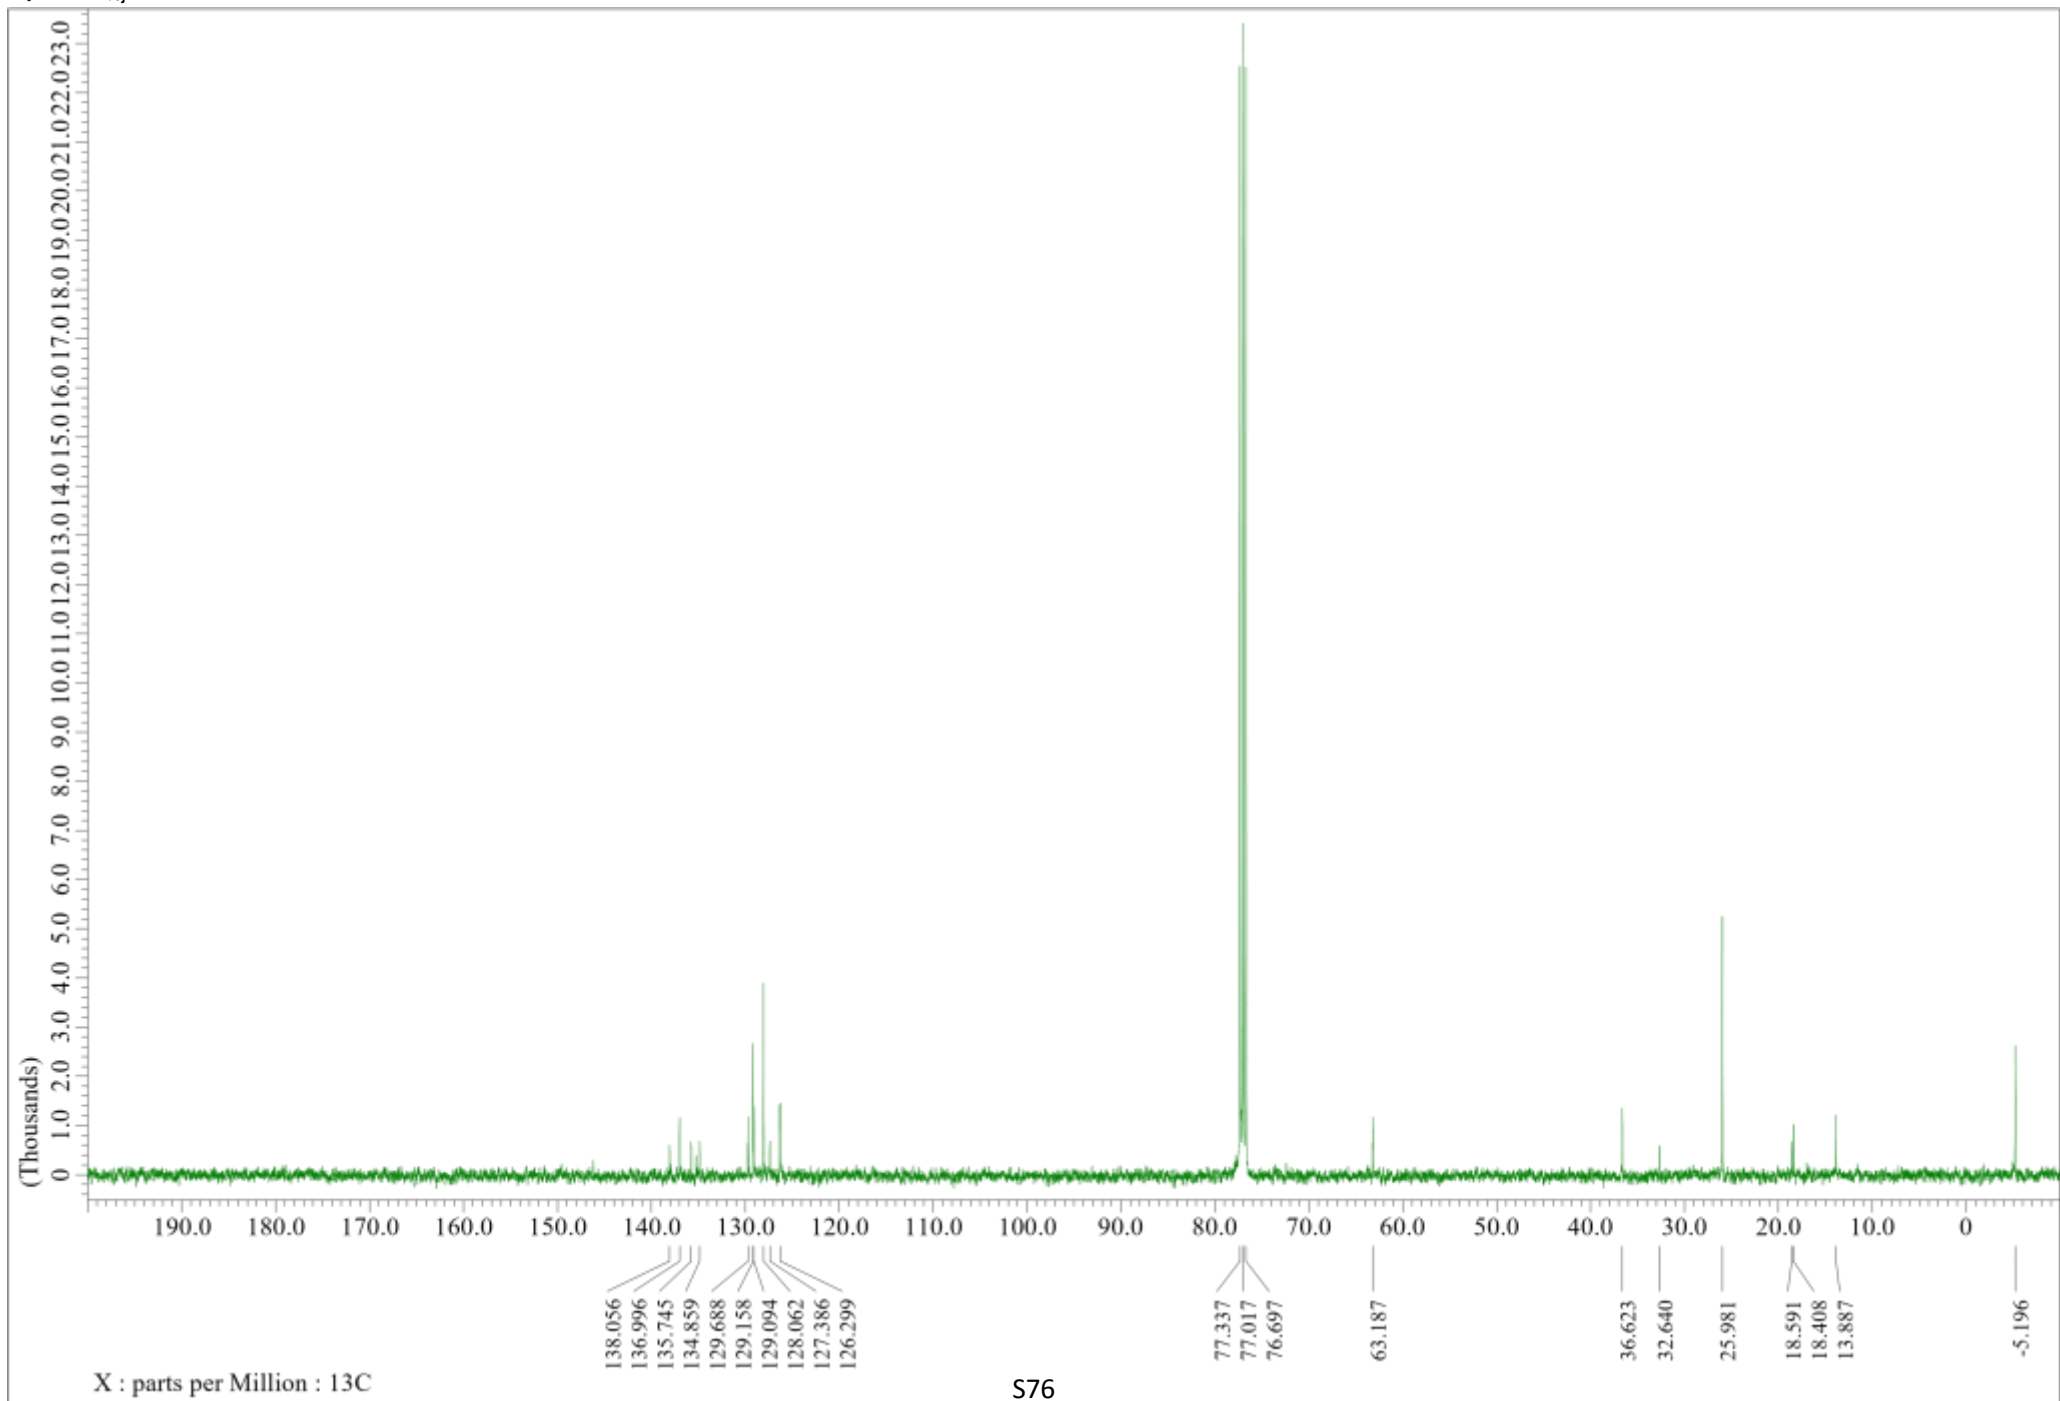

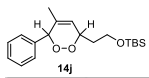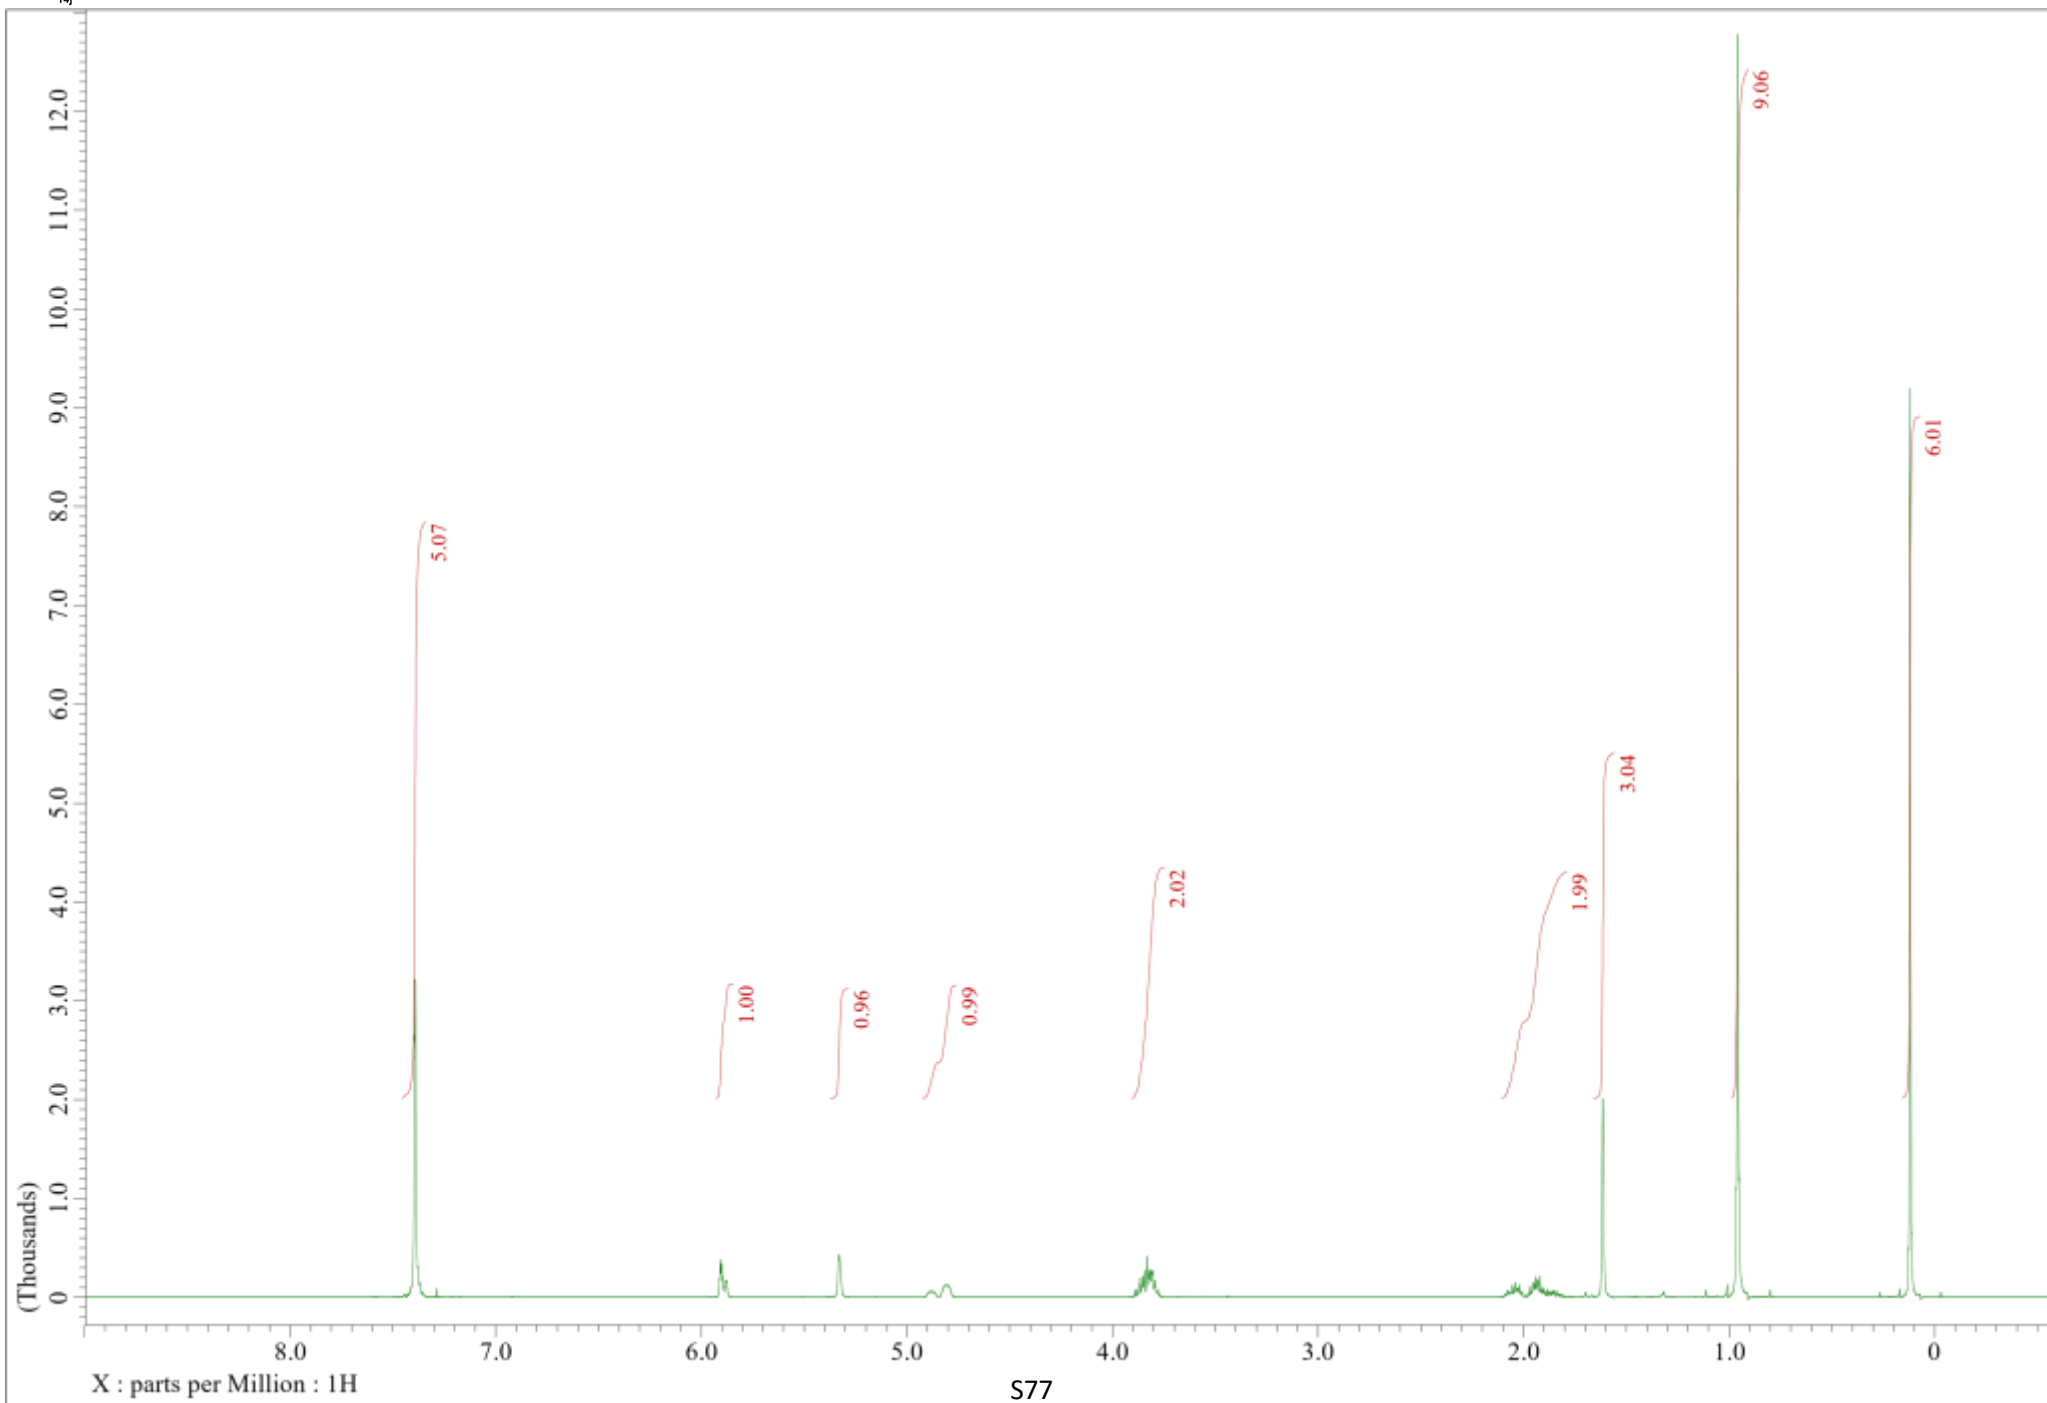

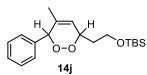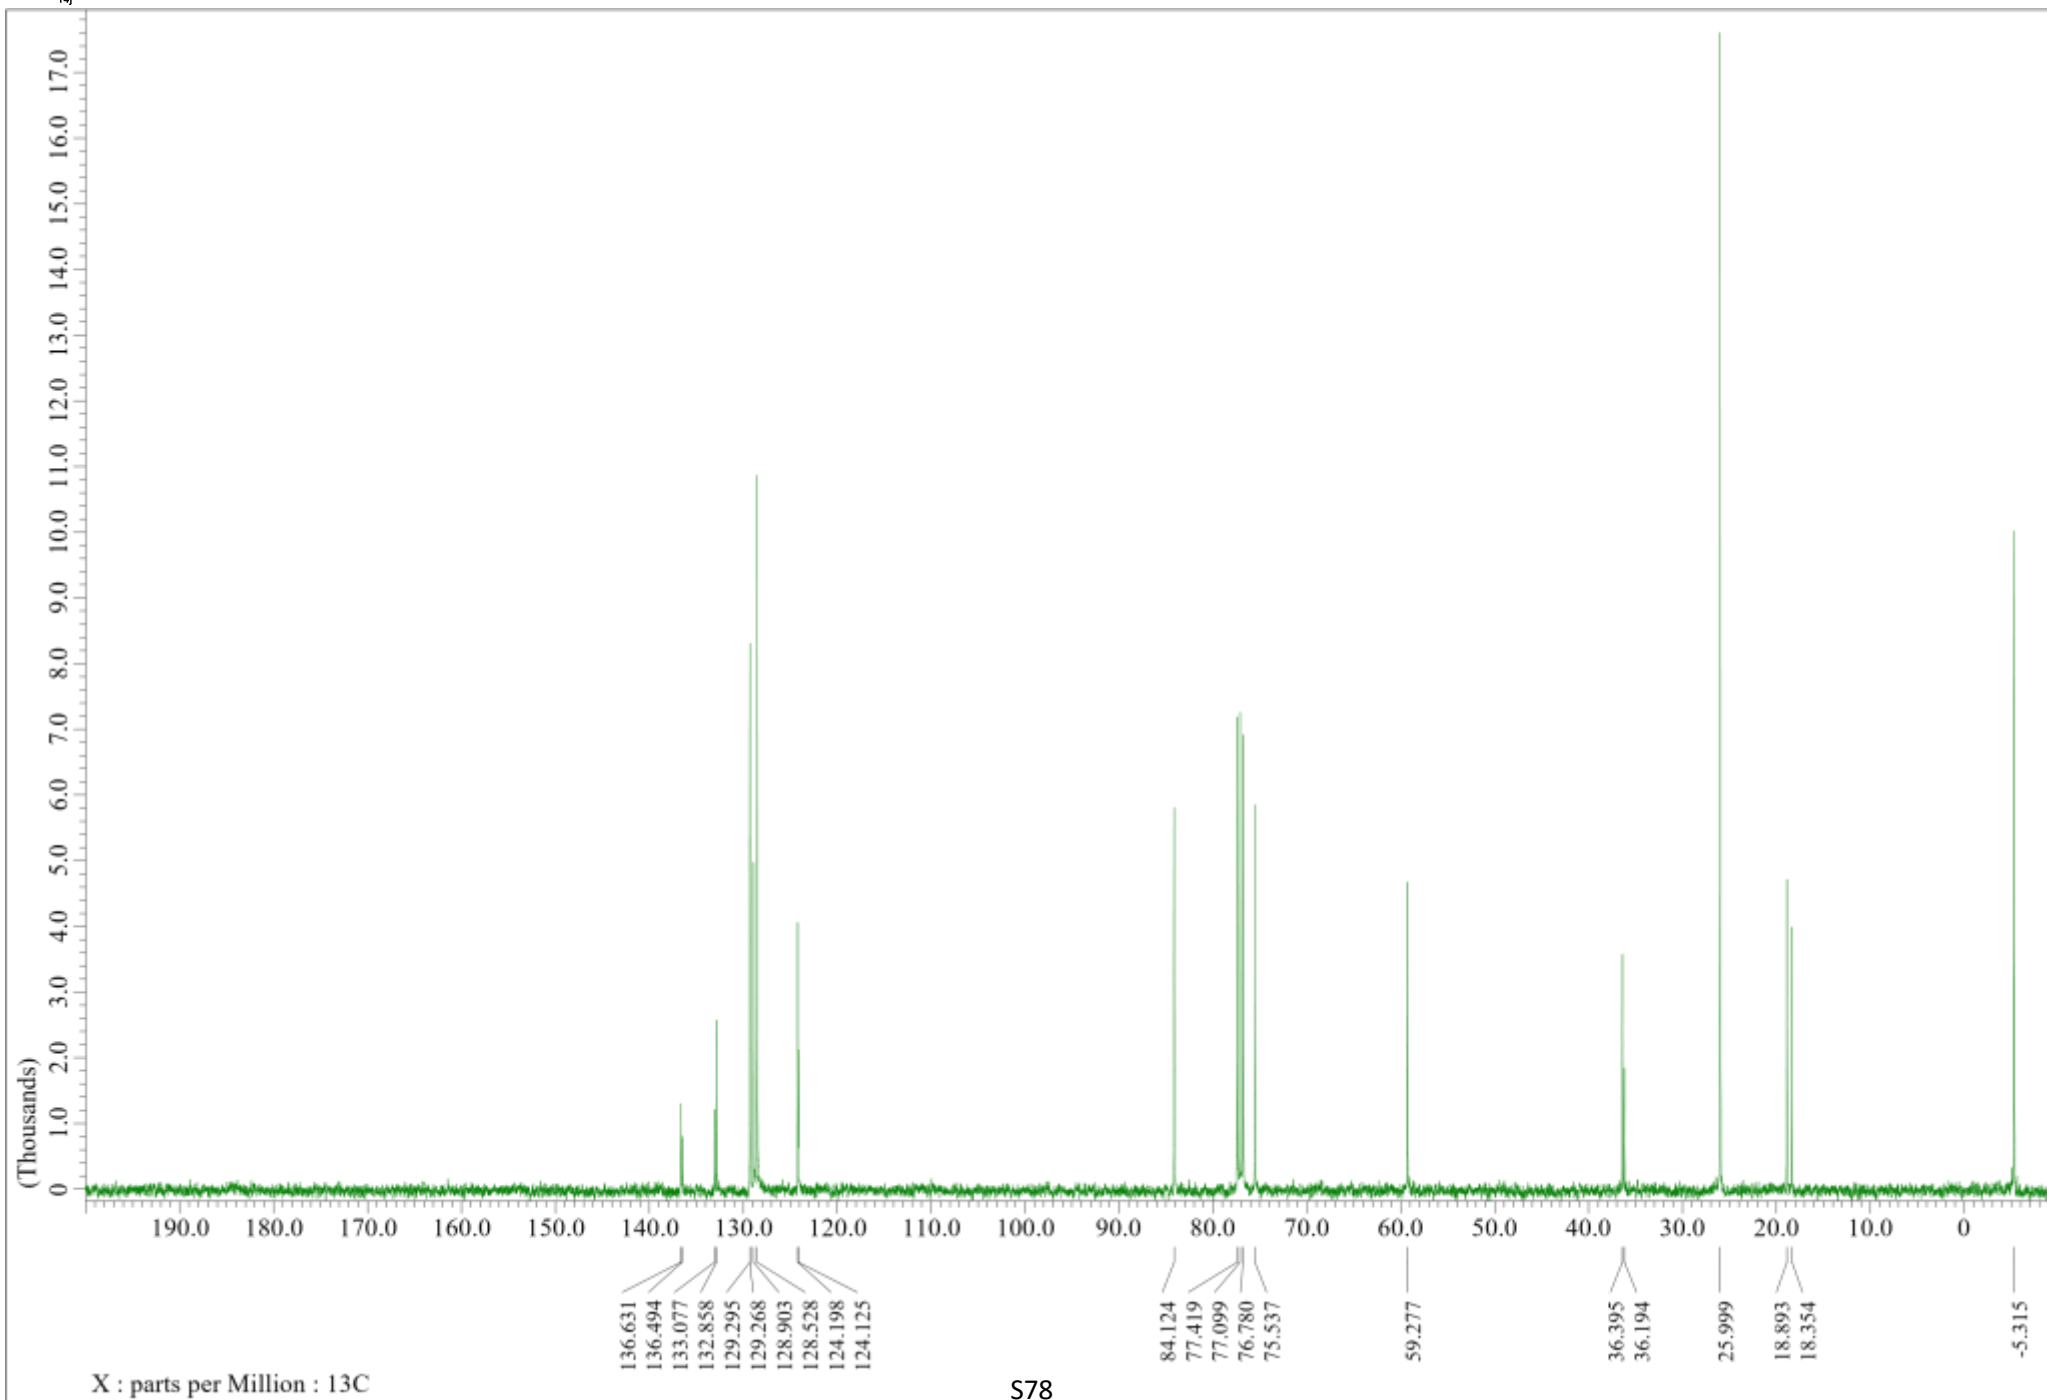

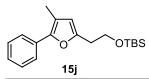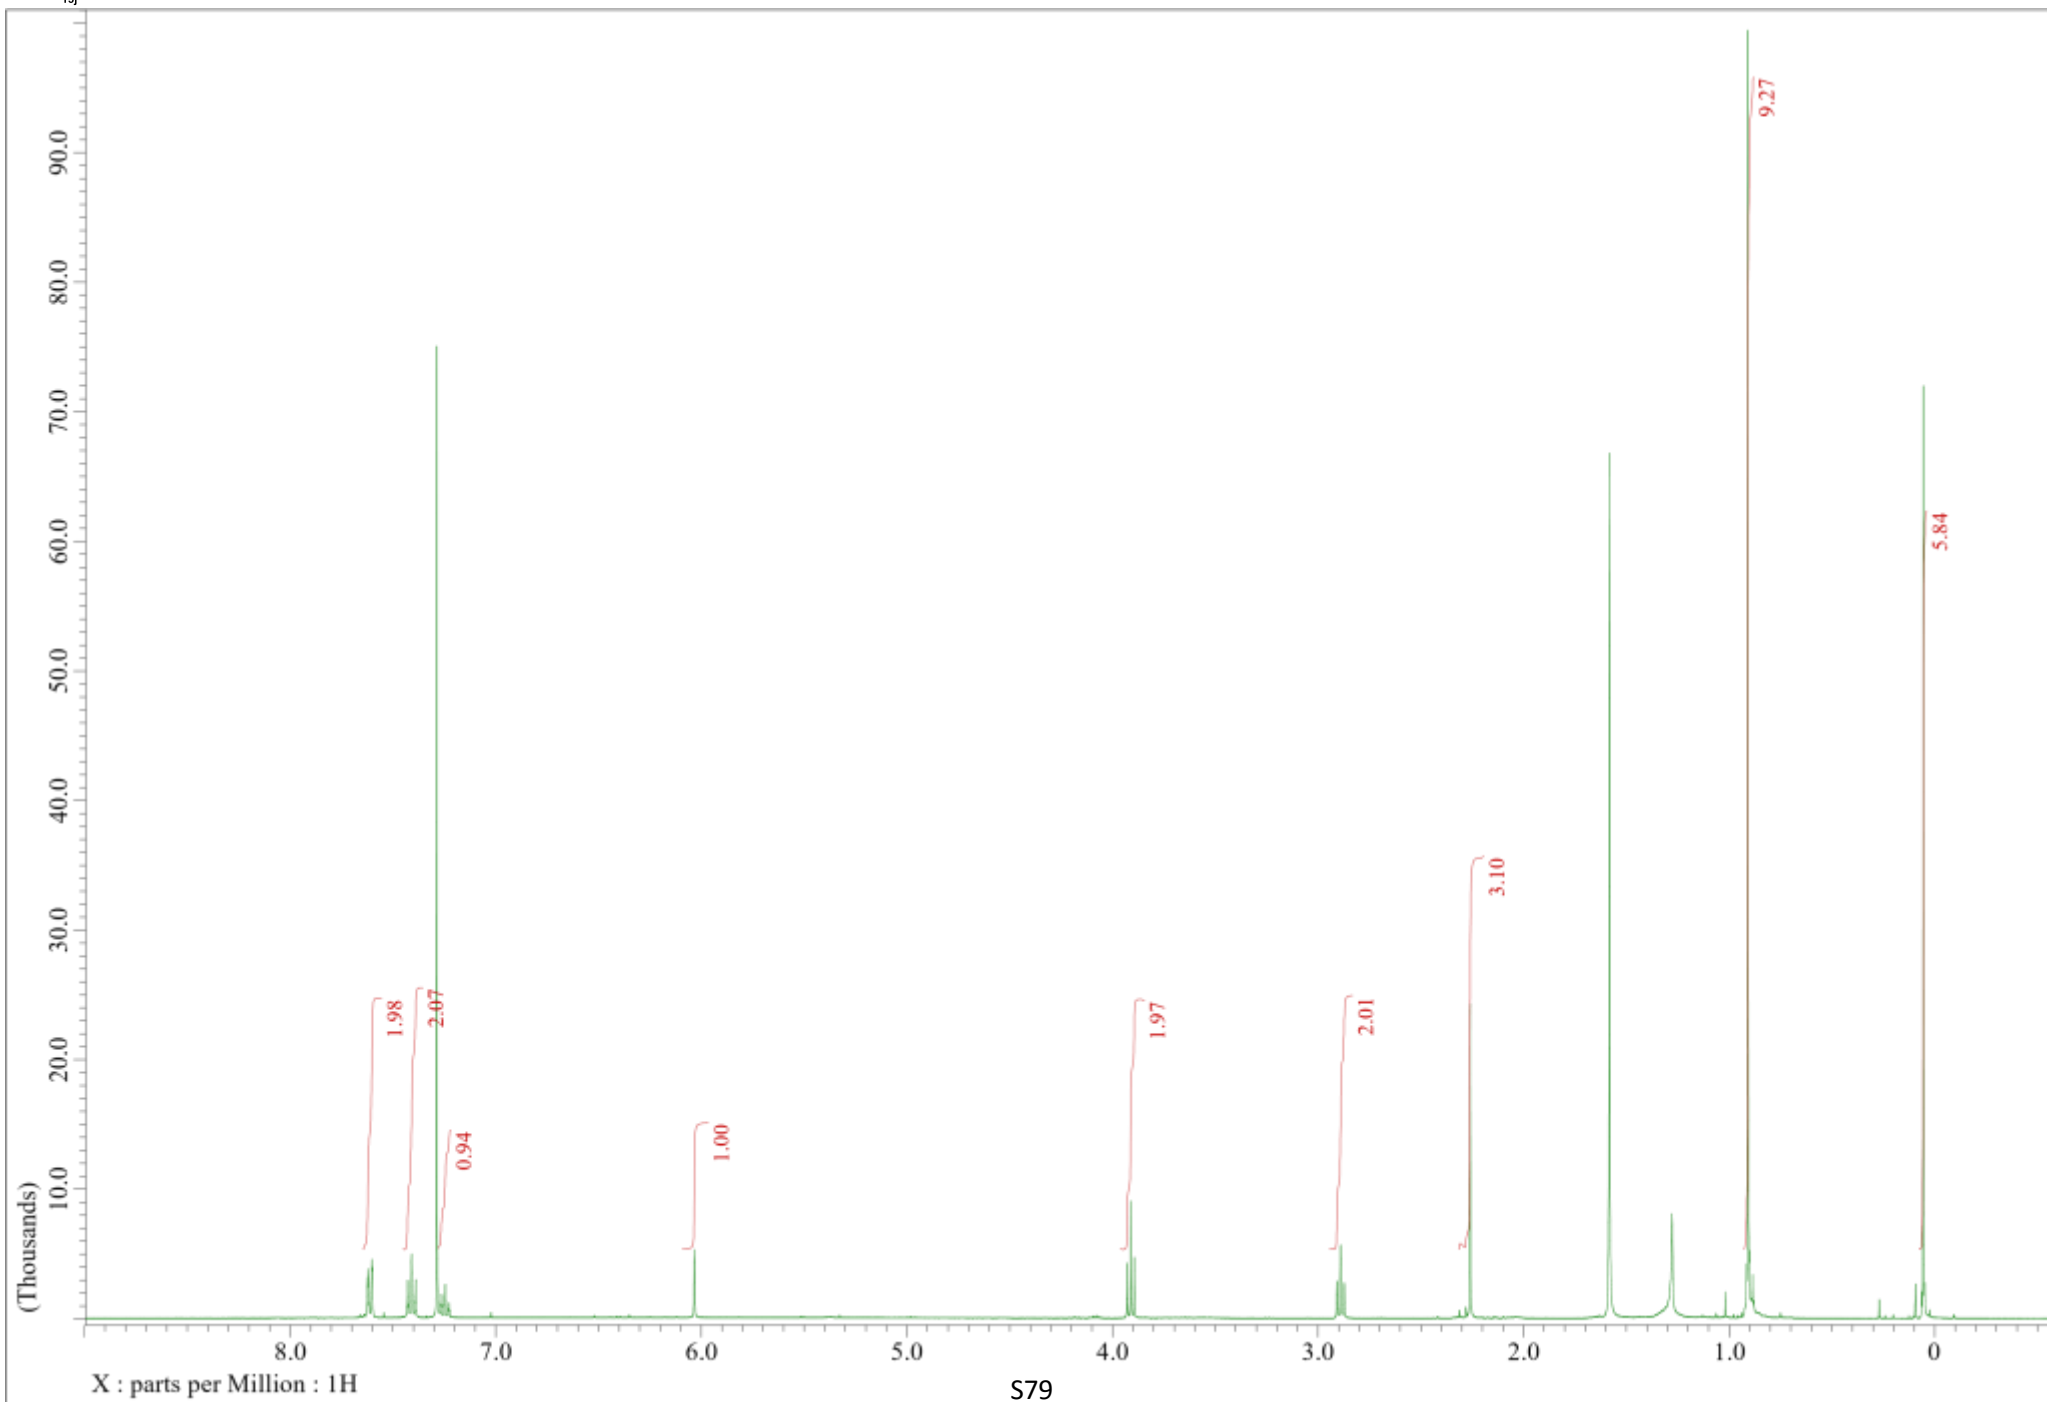

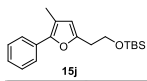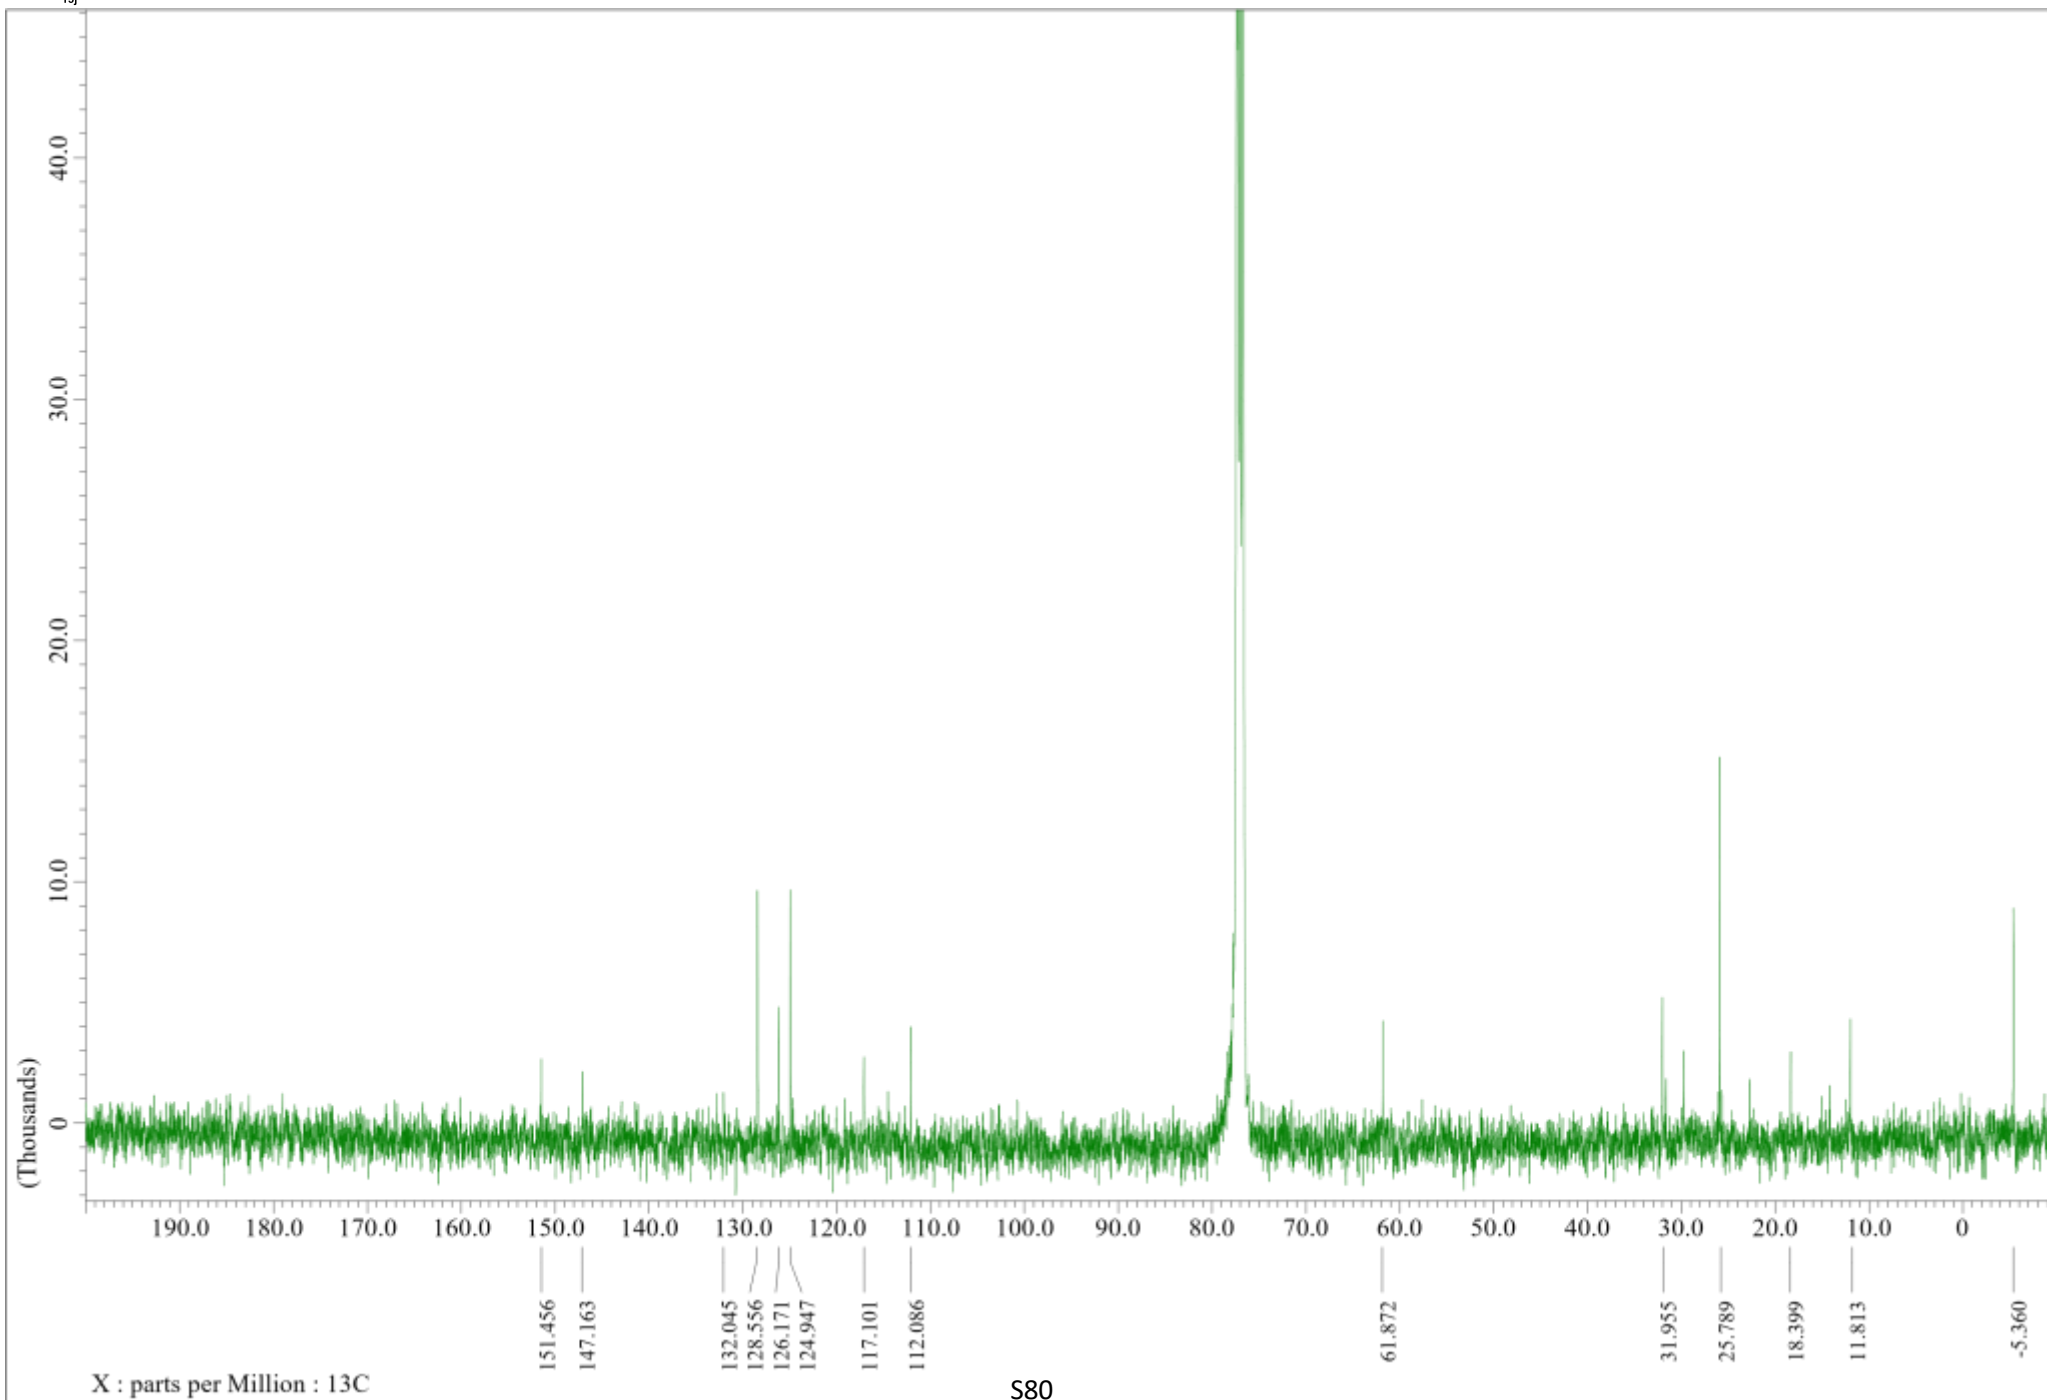



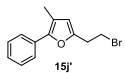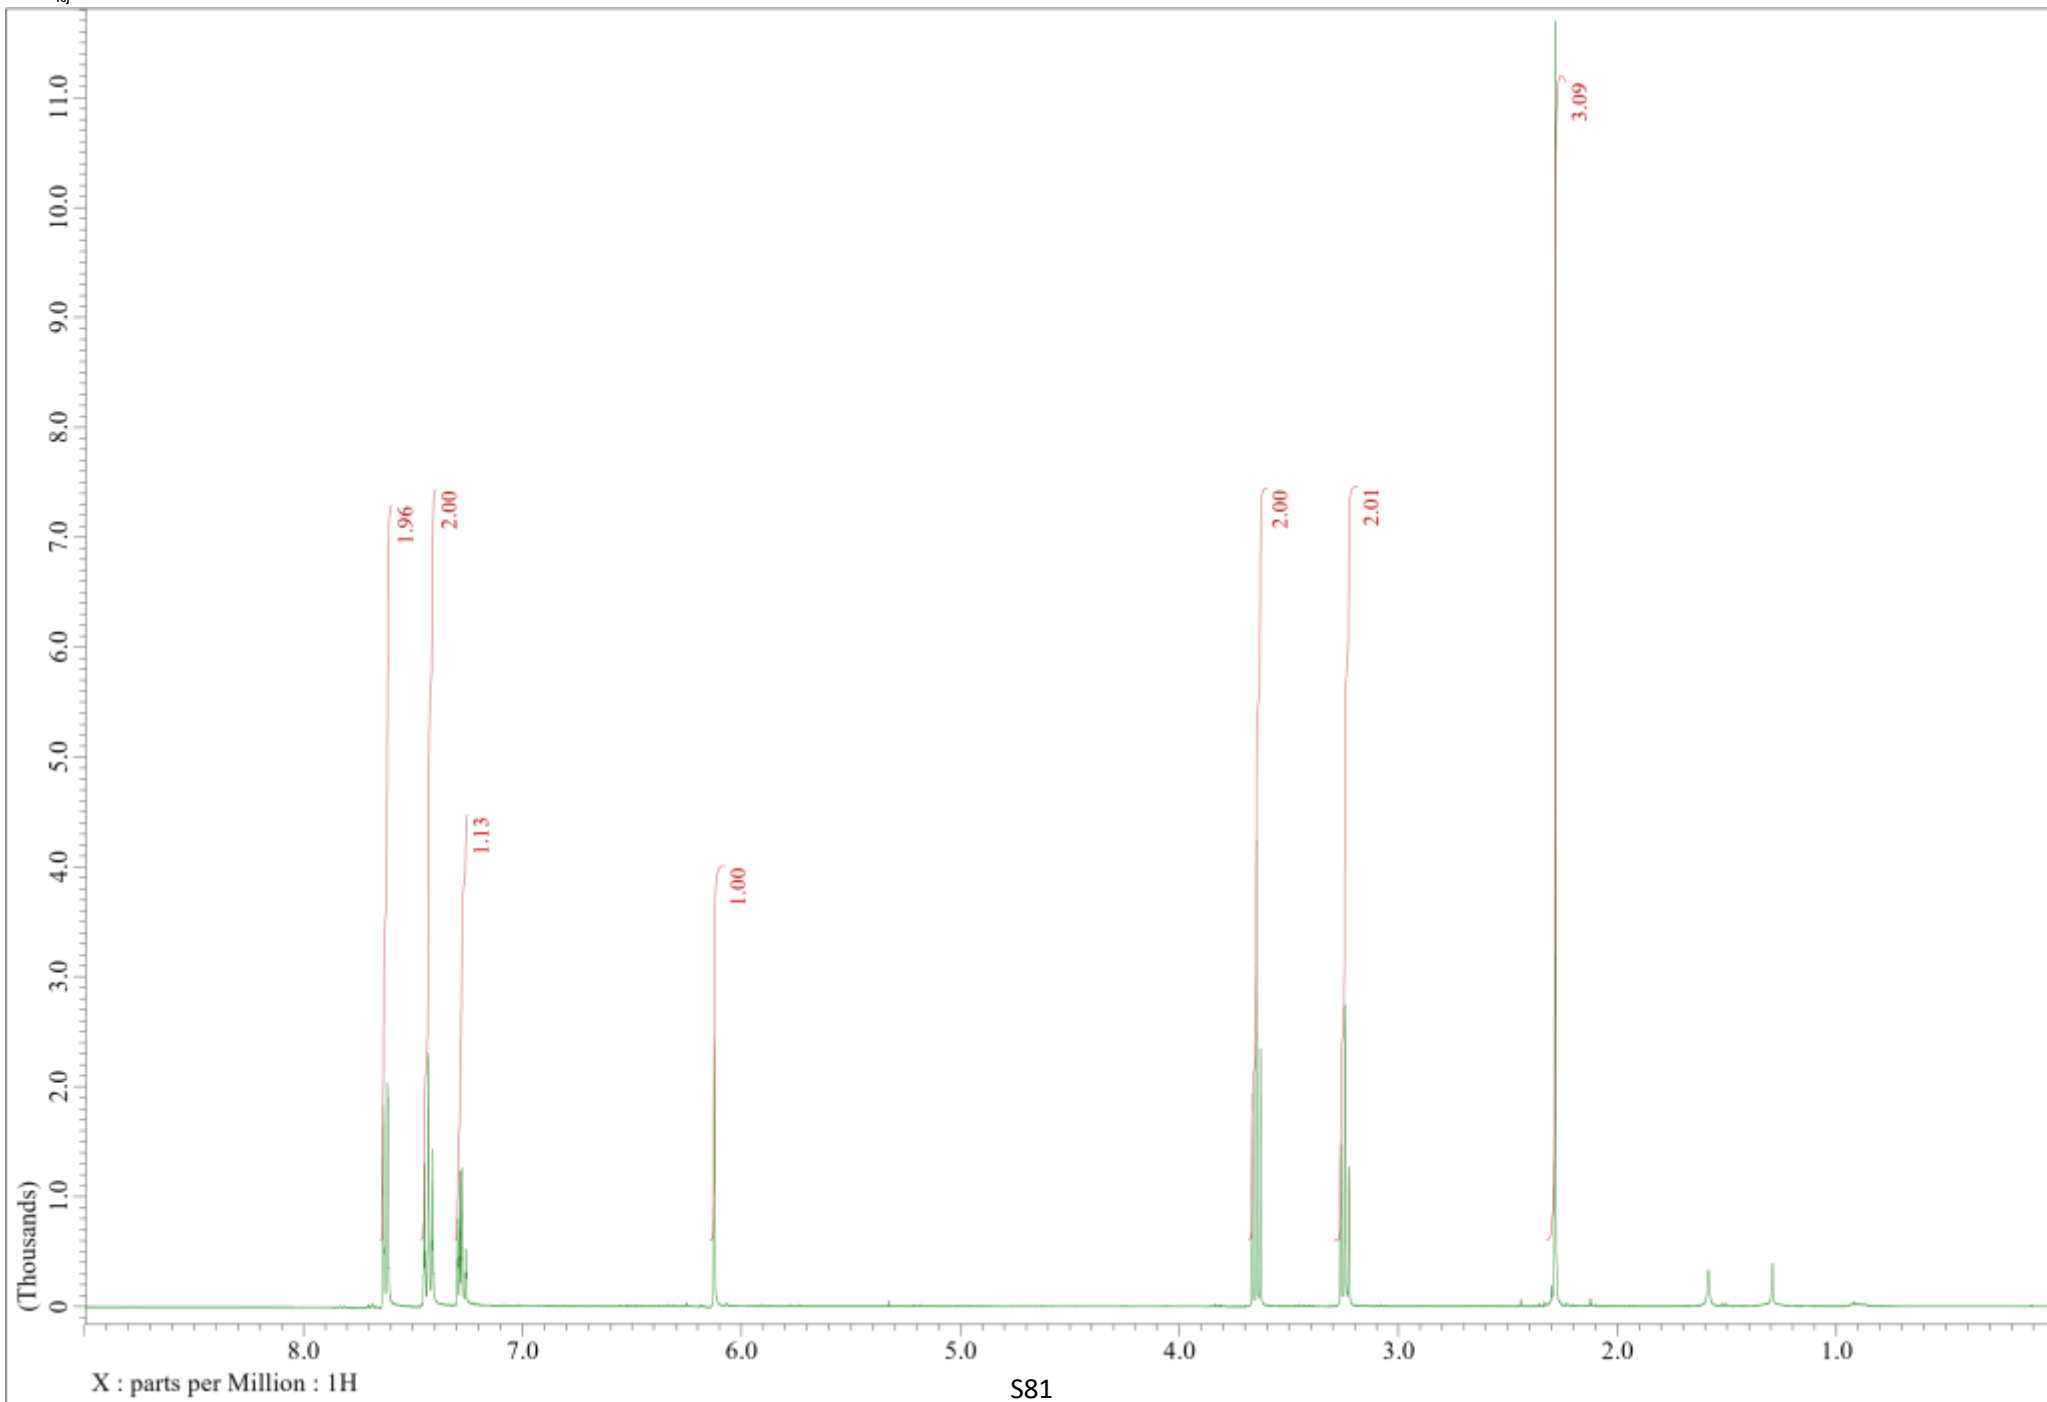

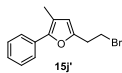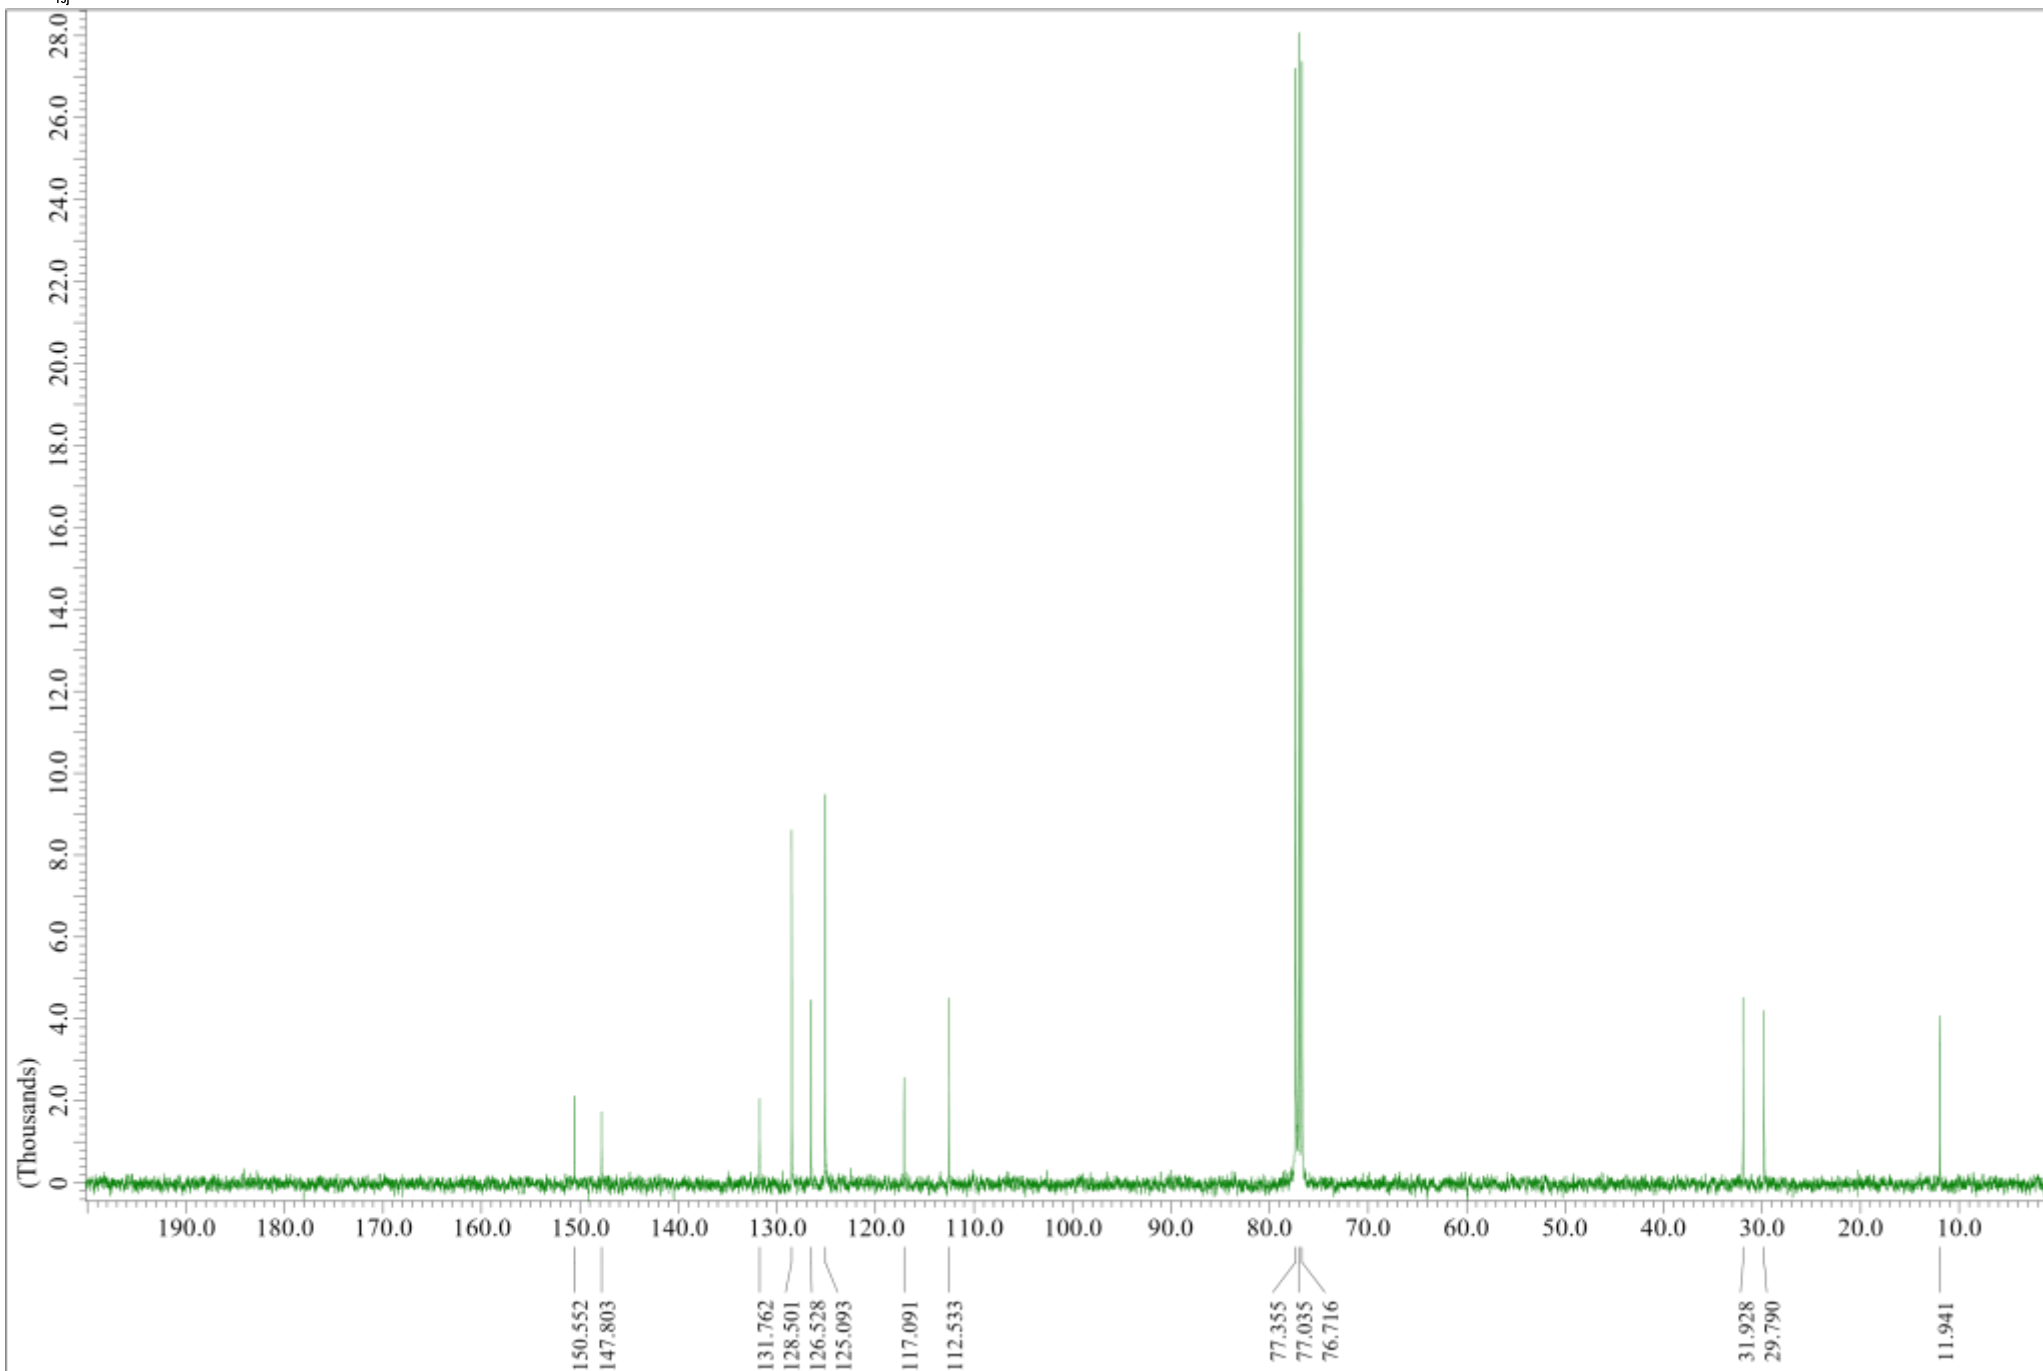

X : parts per Million : <sup>13</sup>C

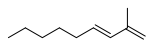

16k

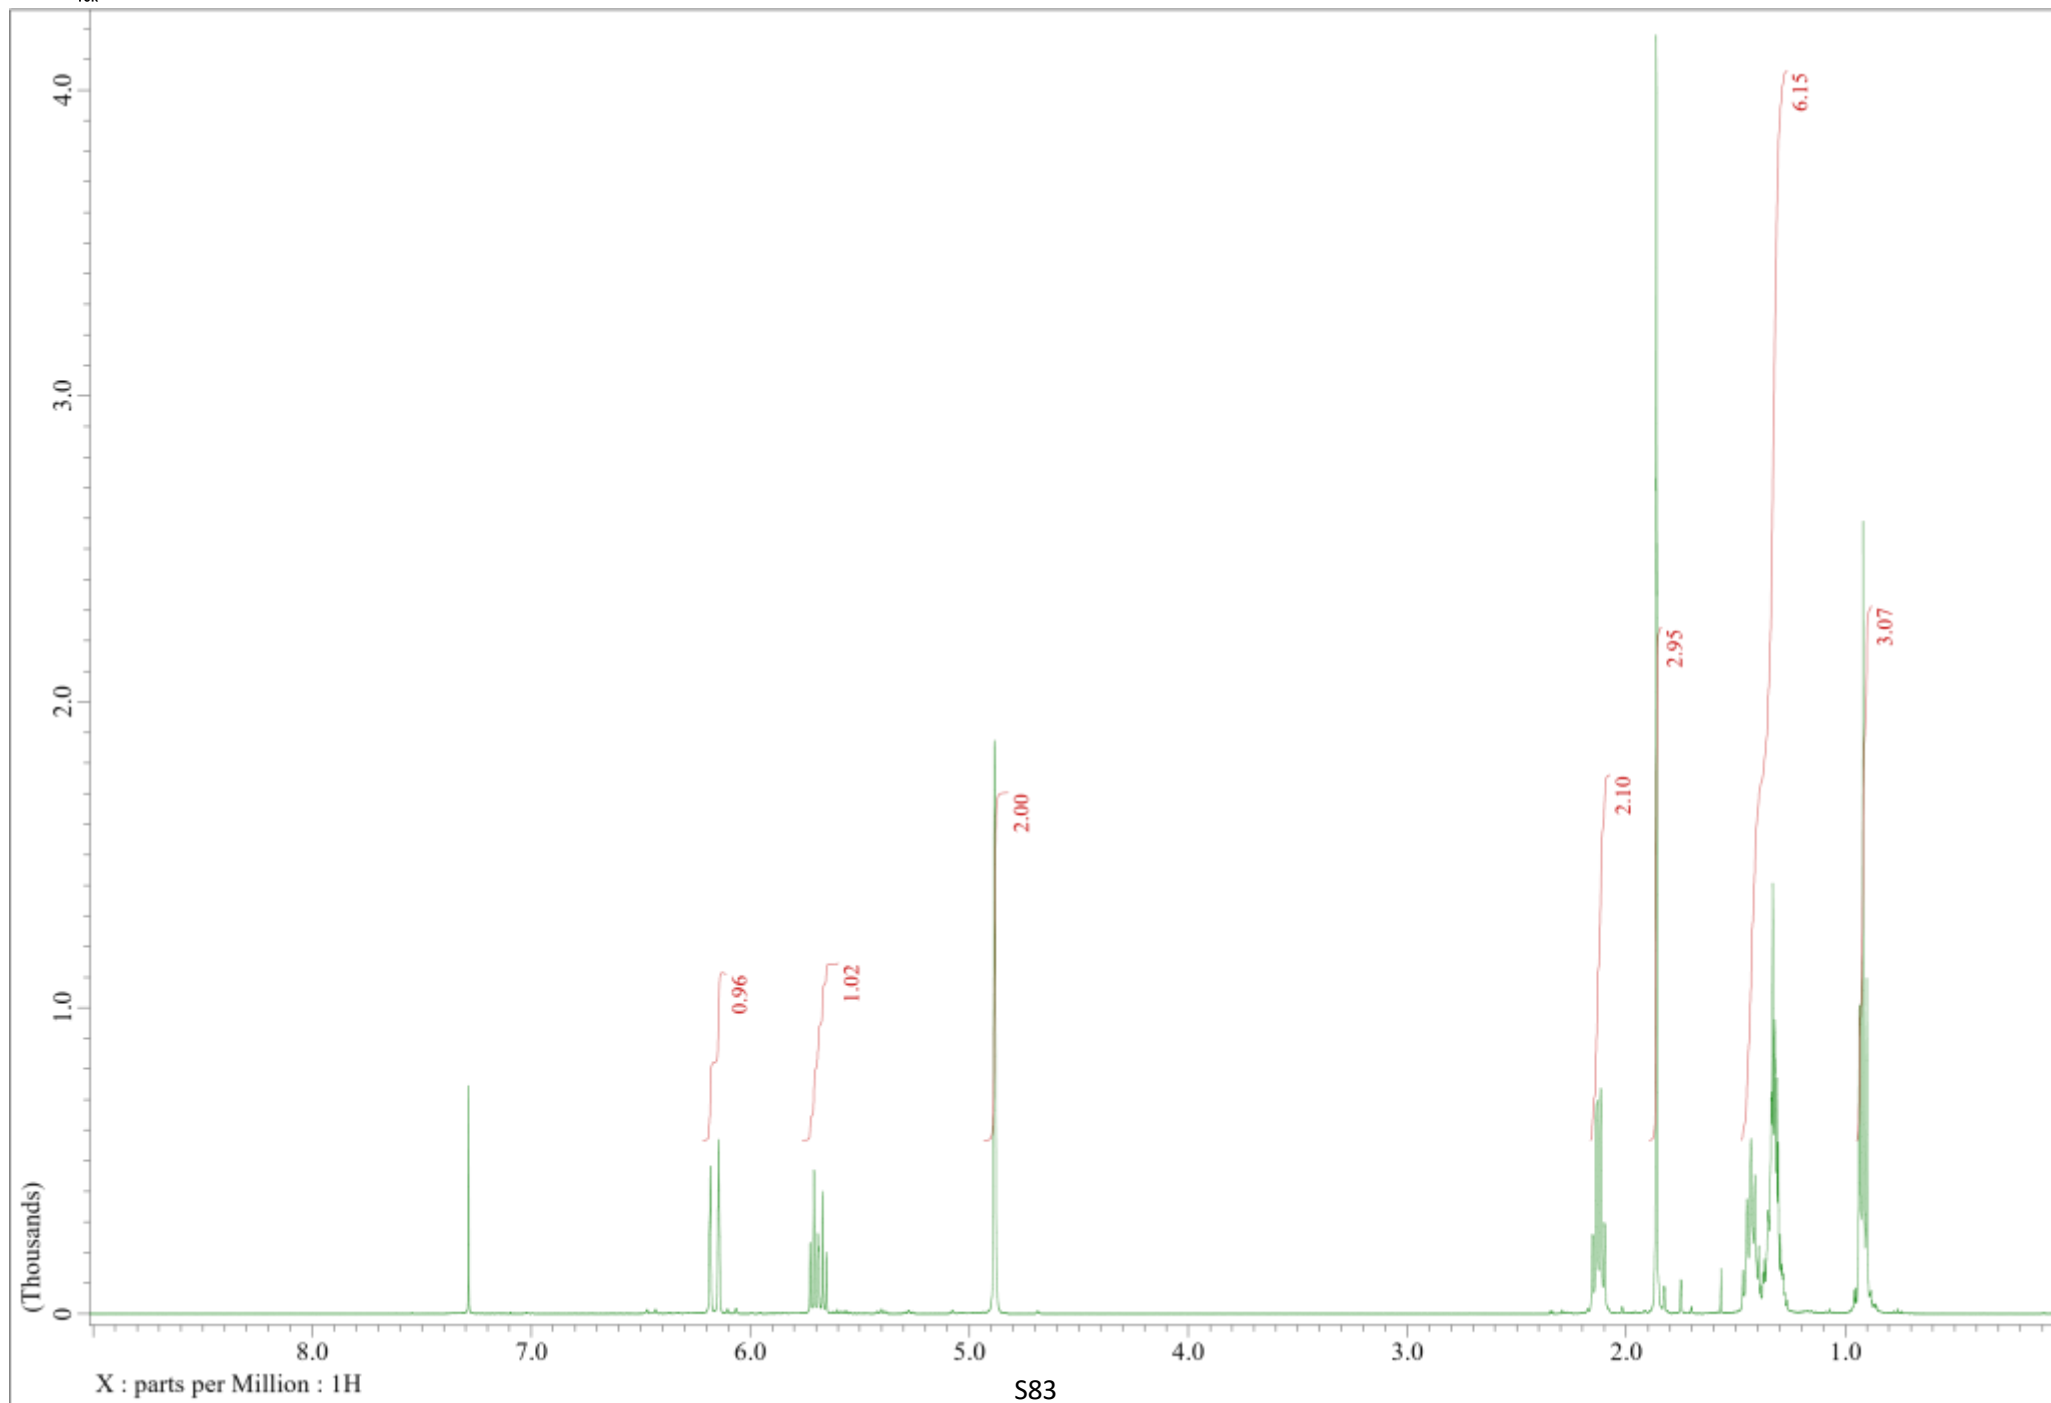

S83

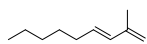

16k

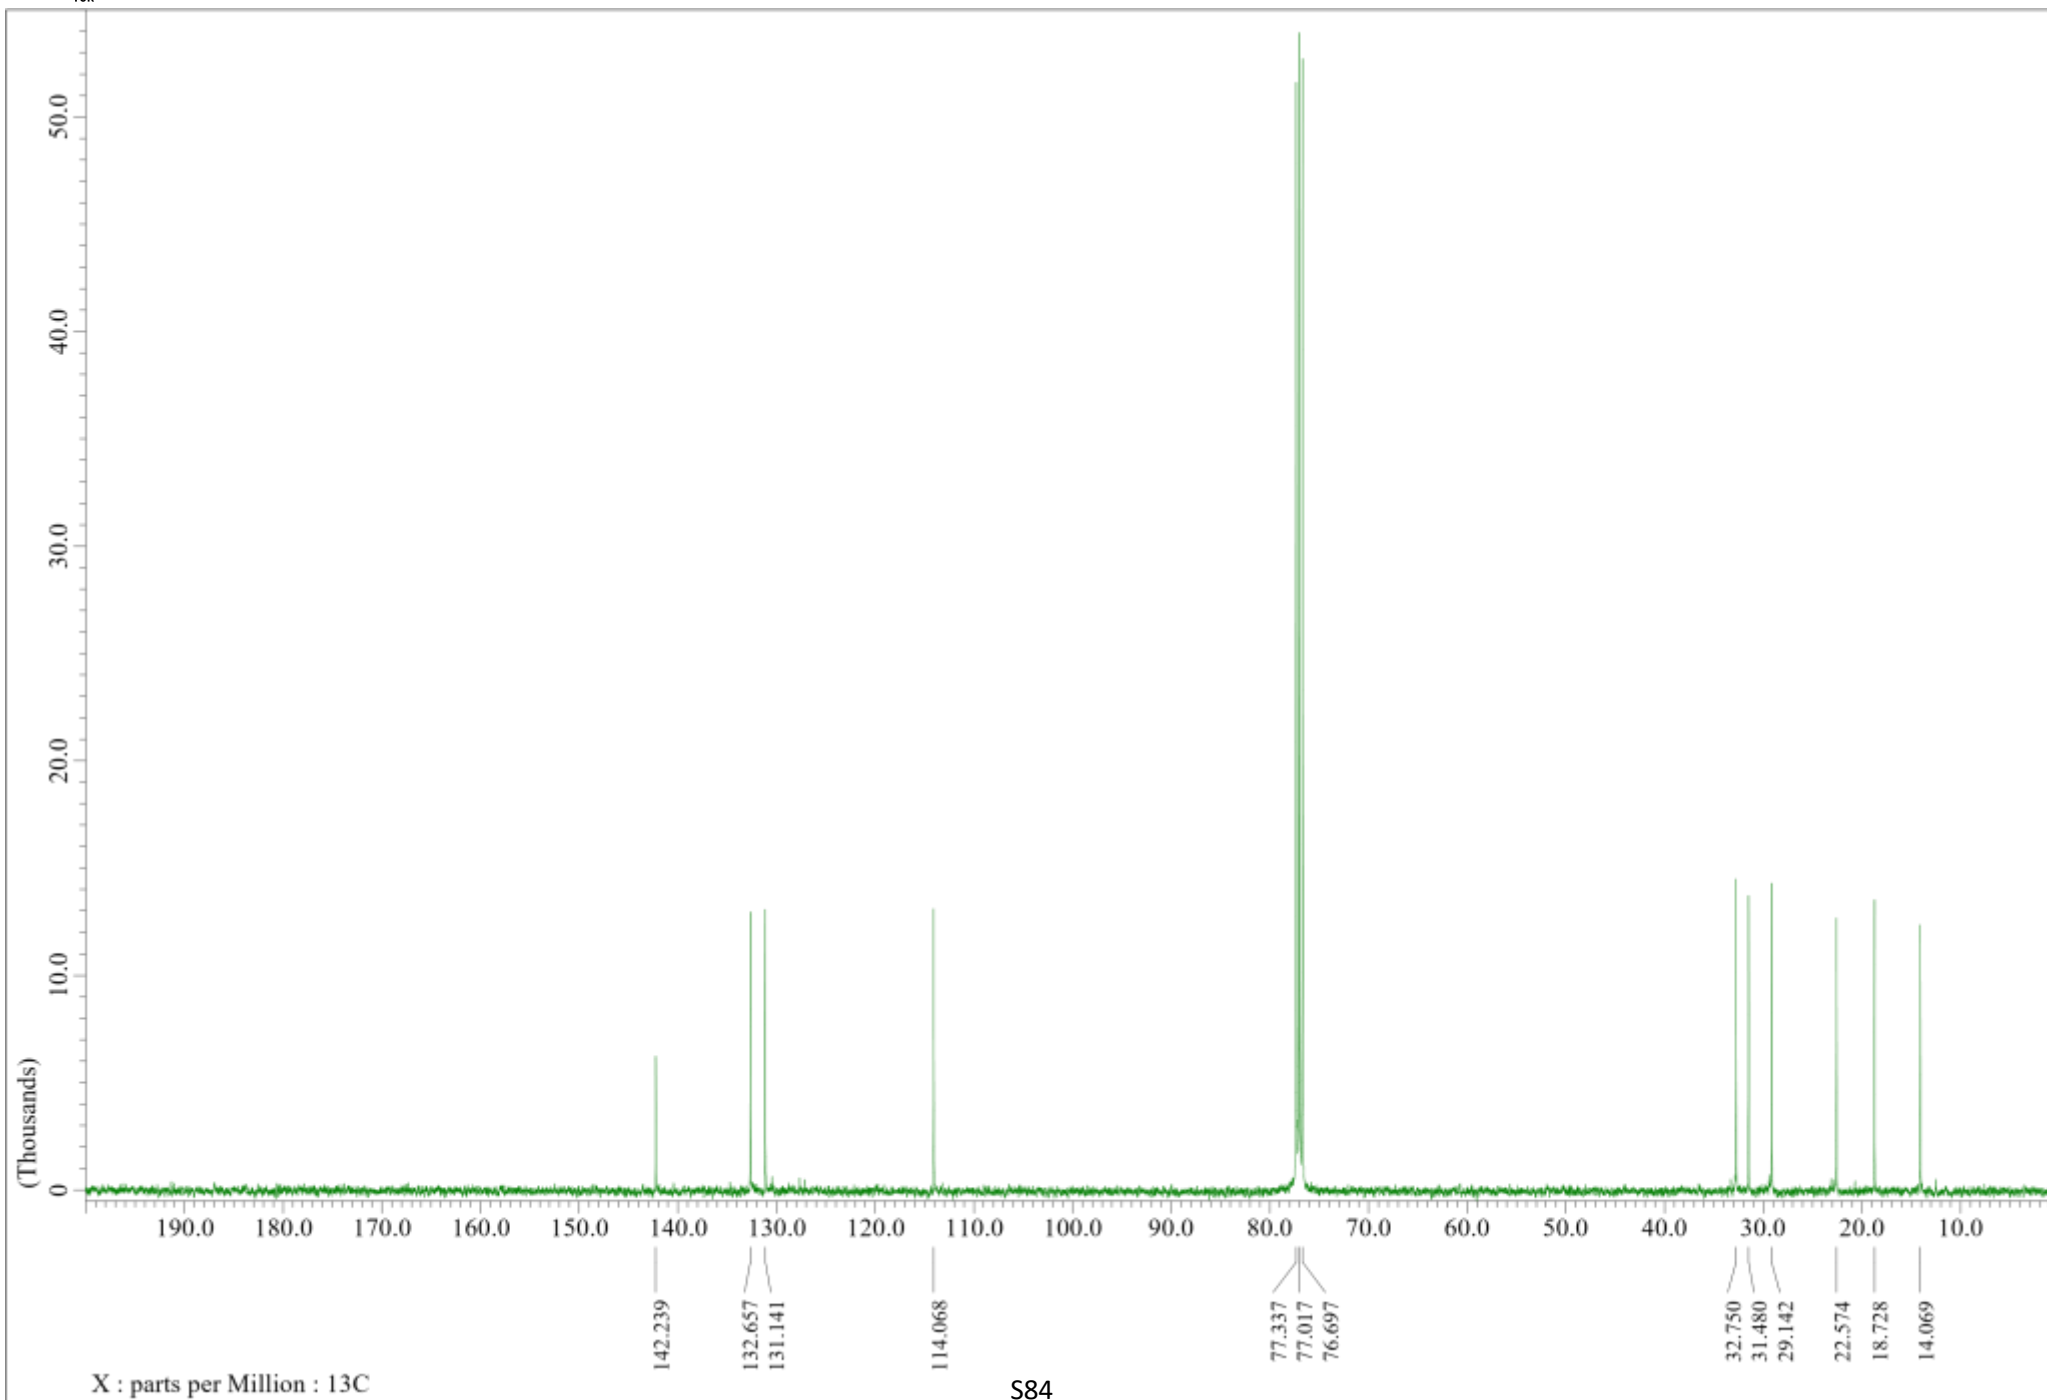

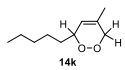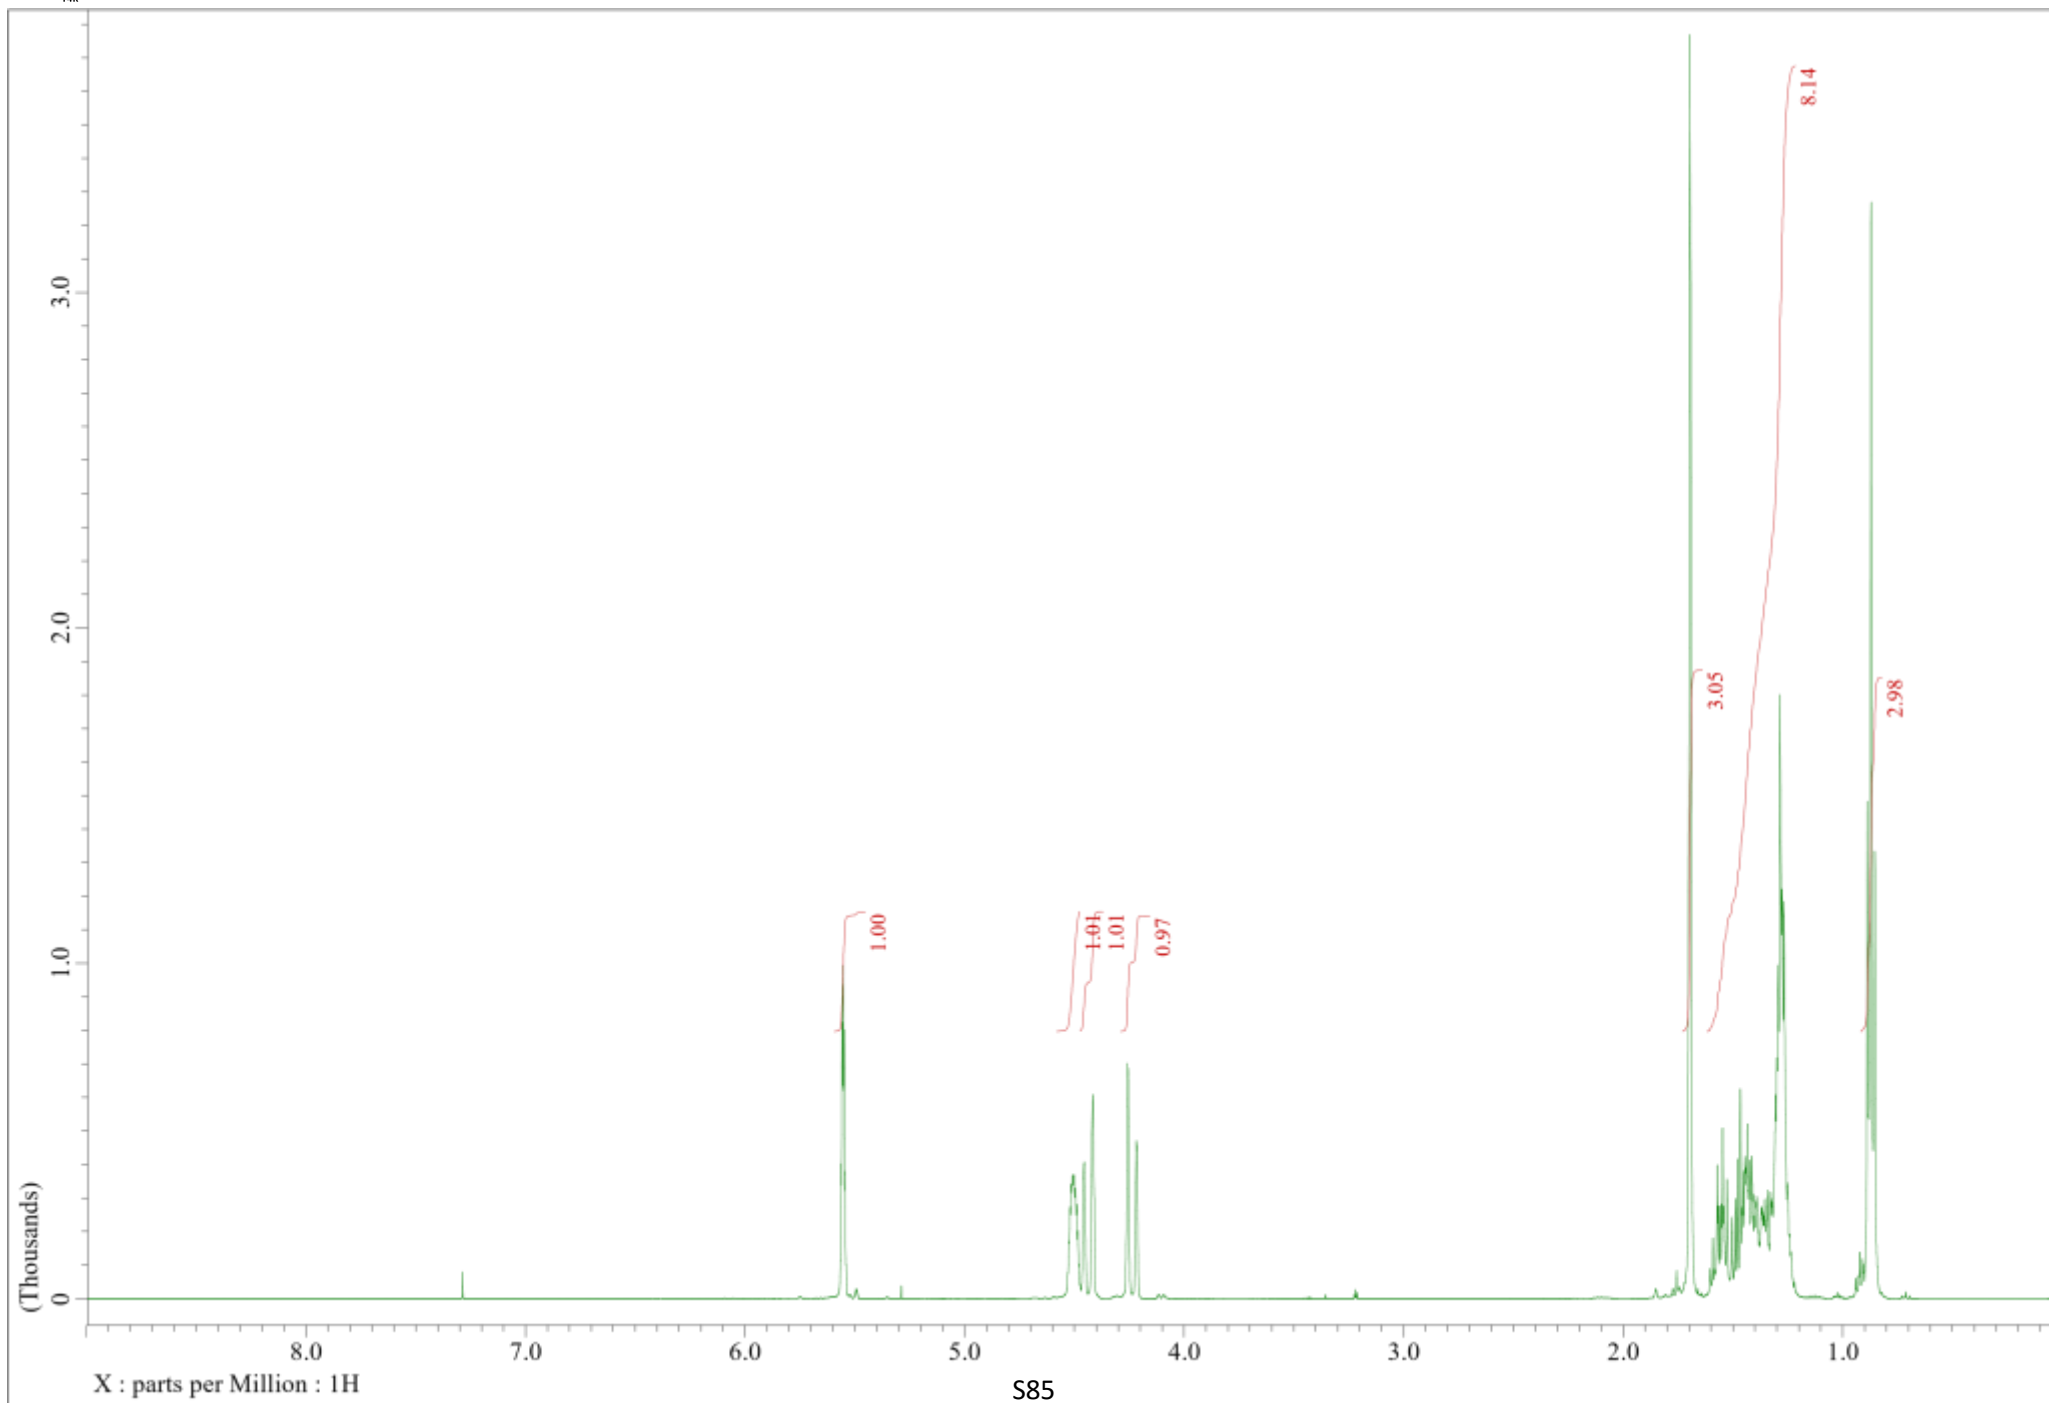

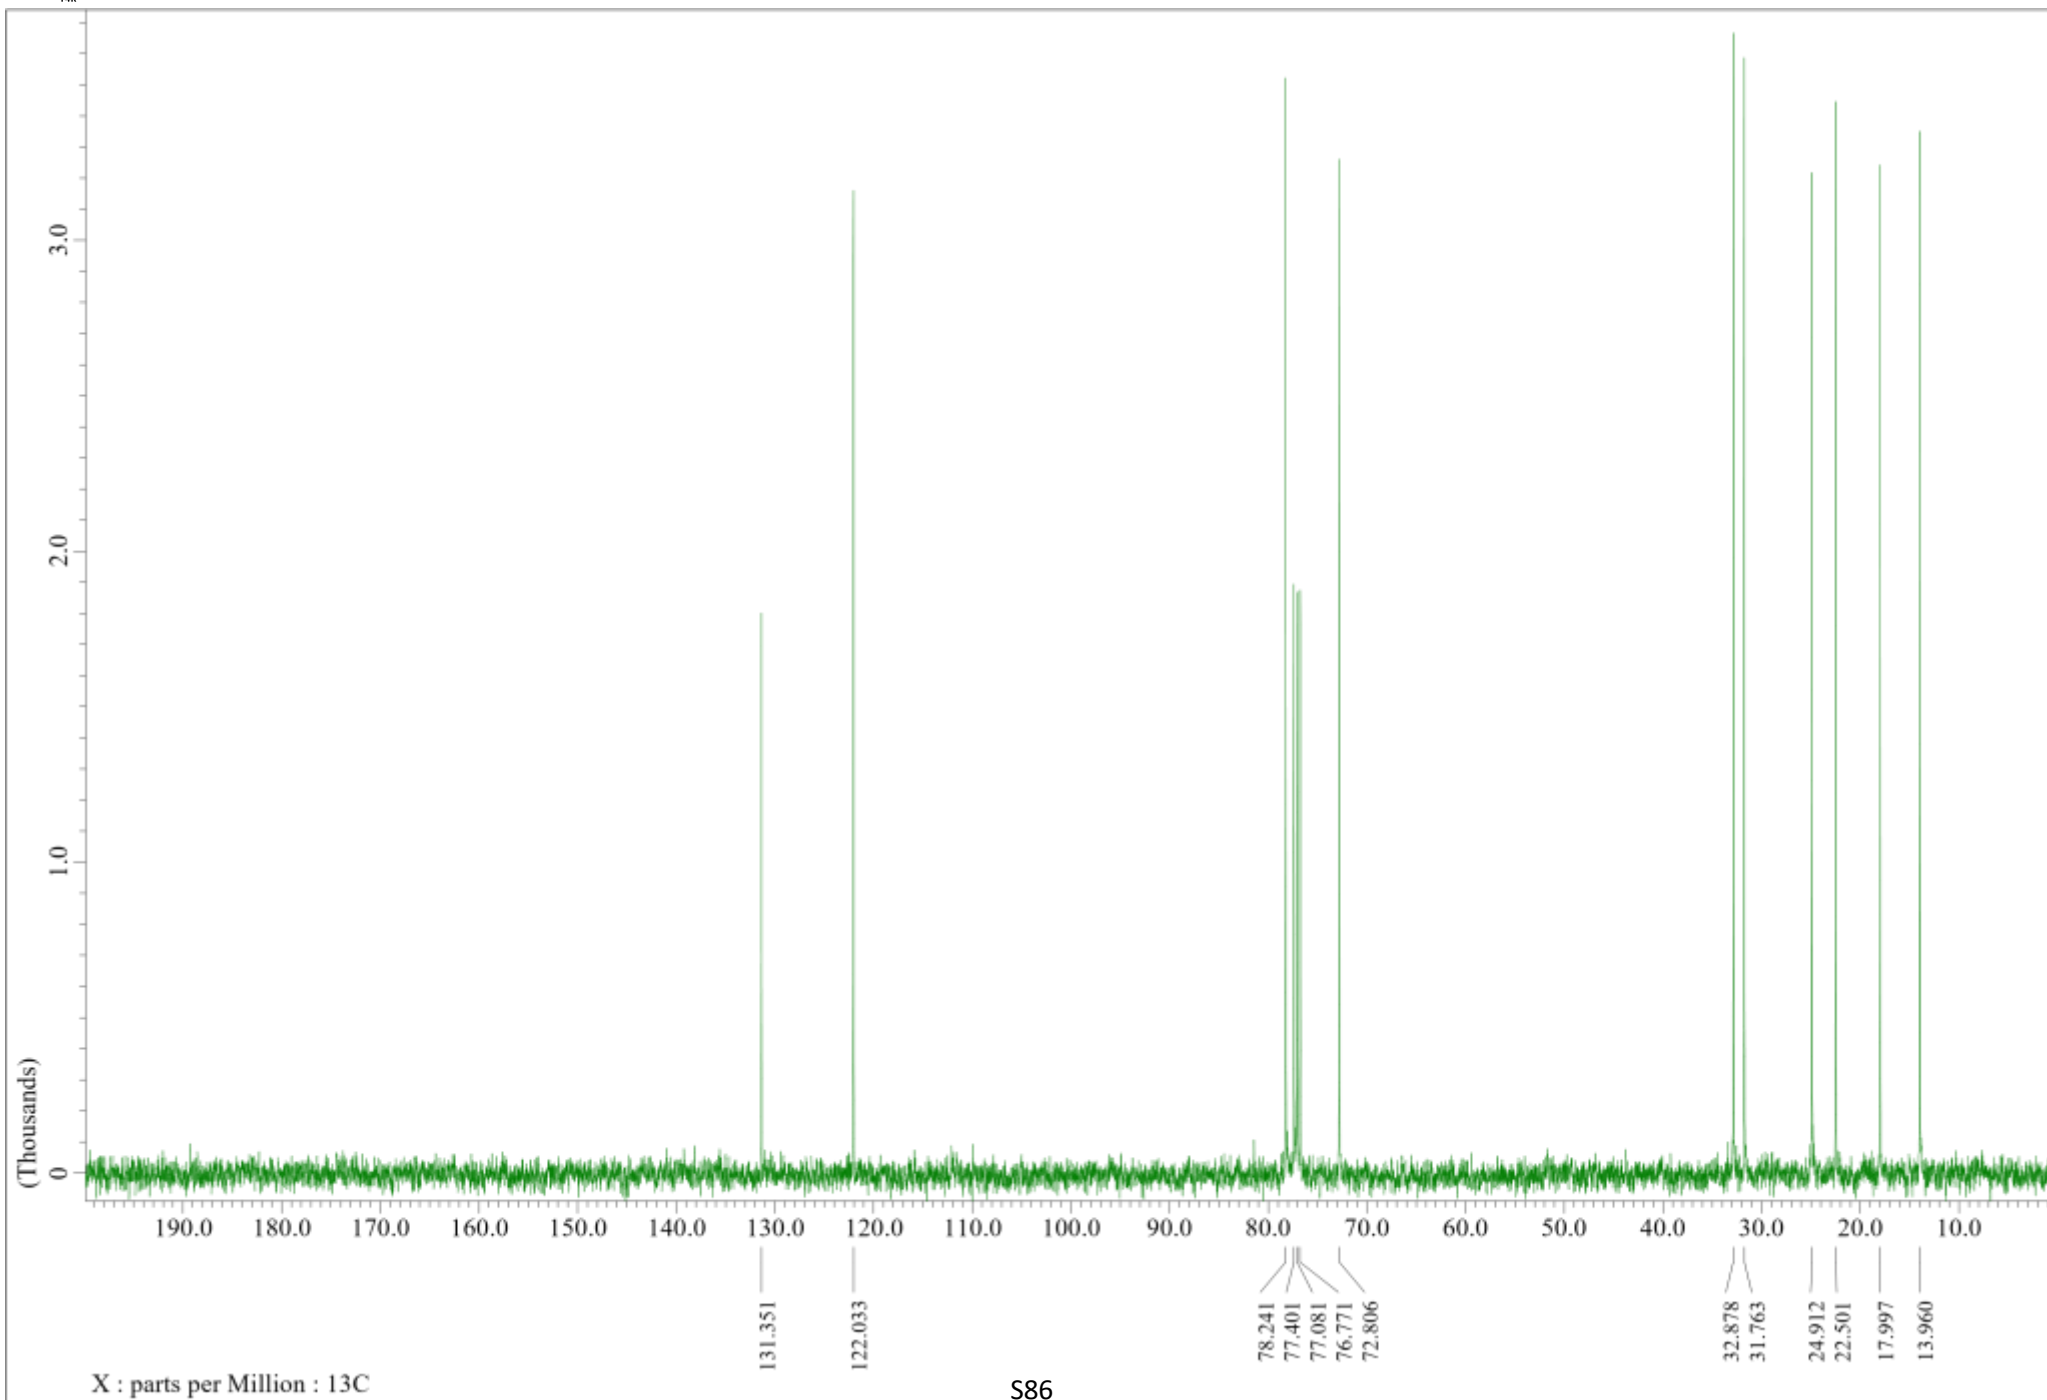

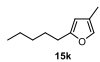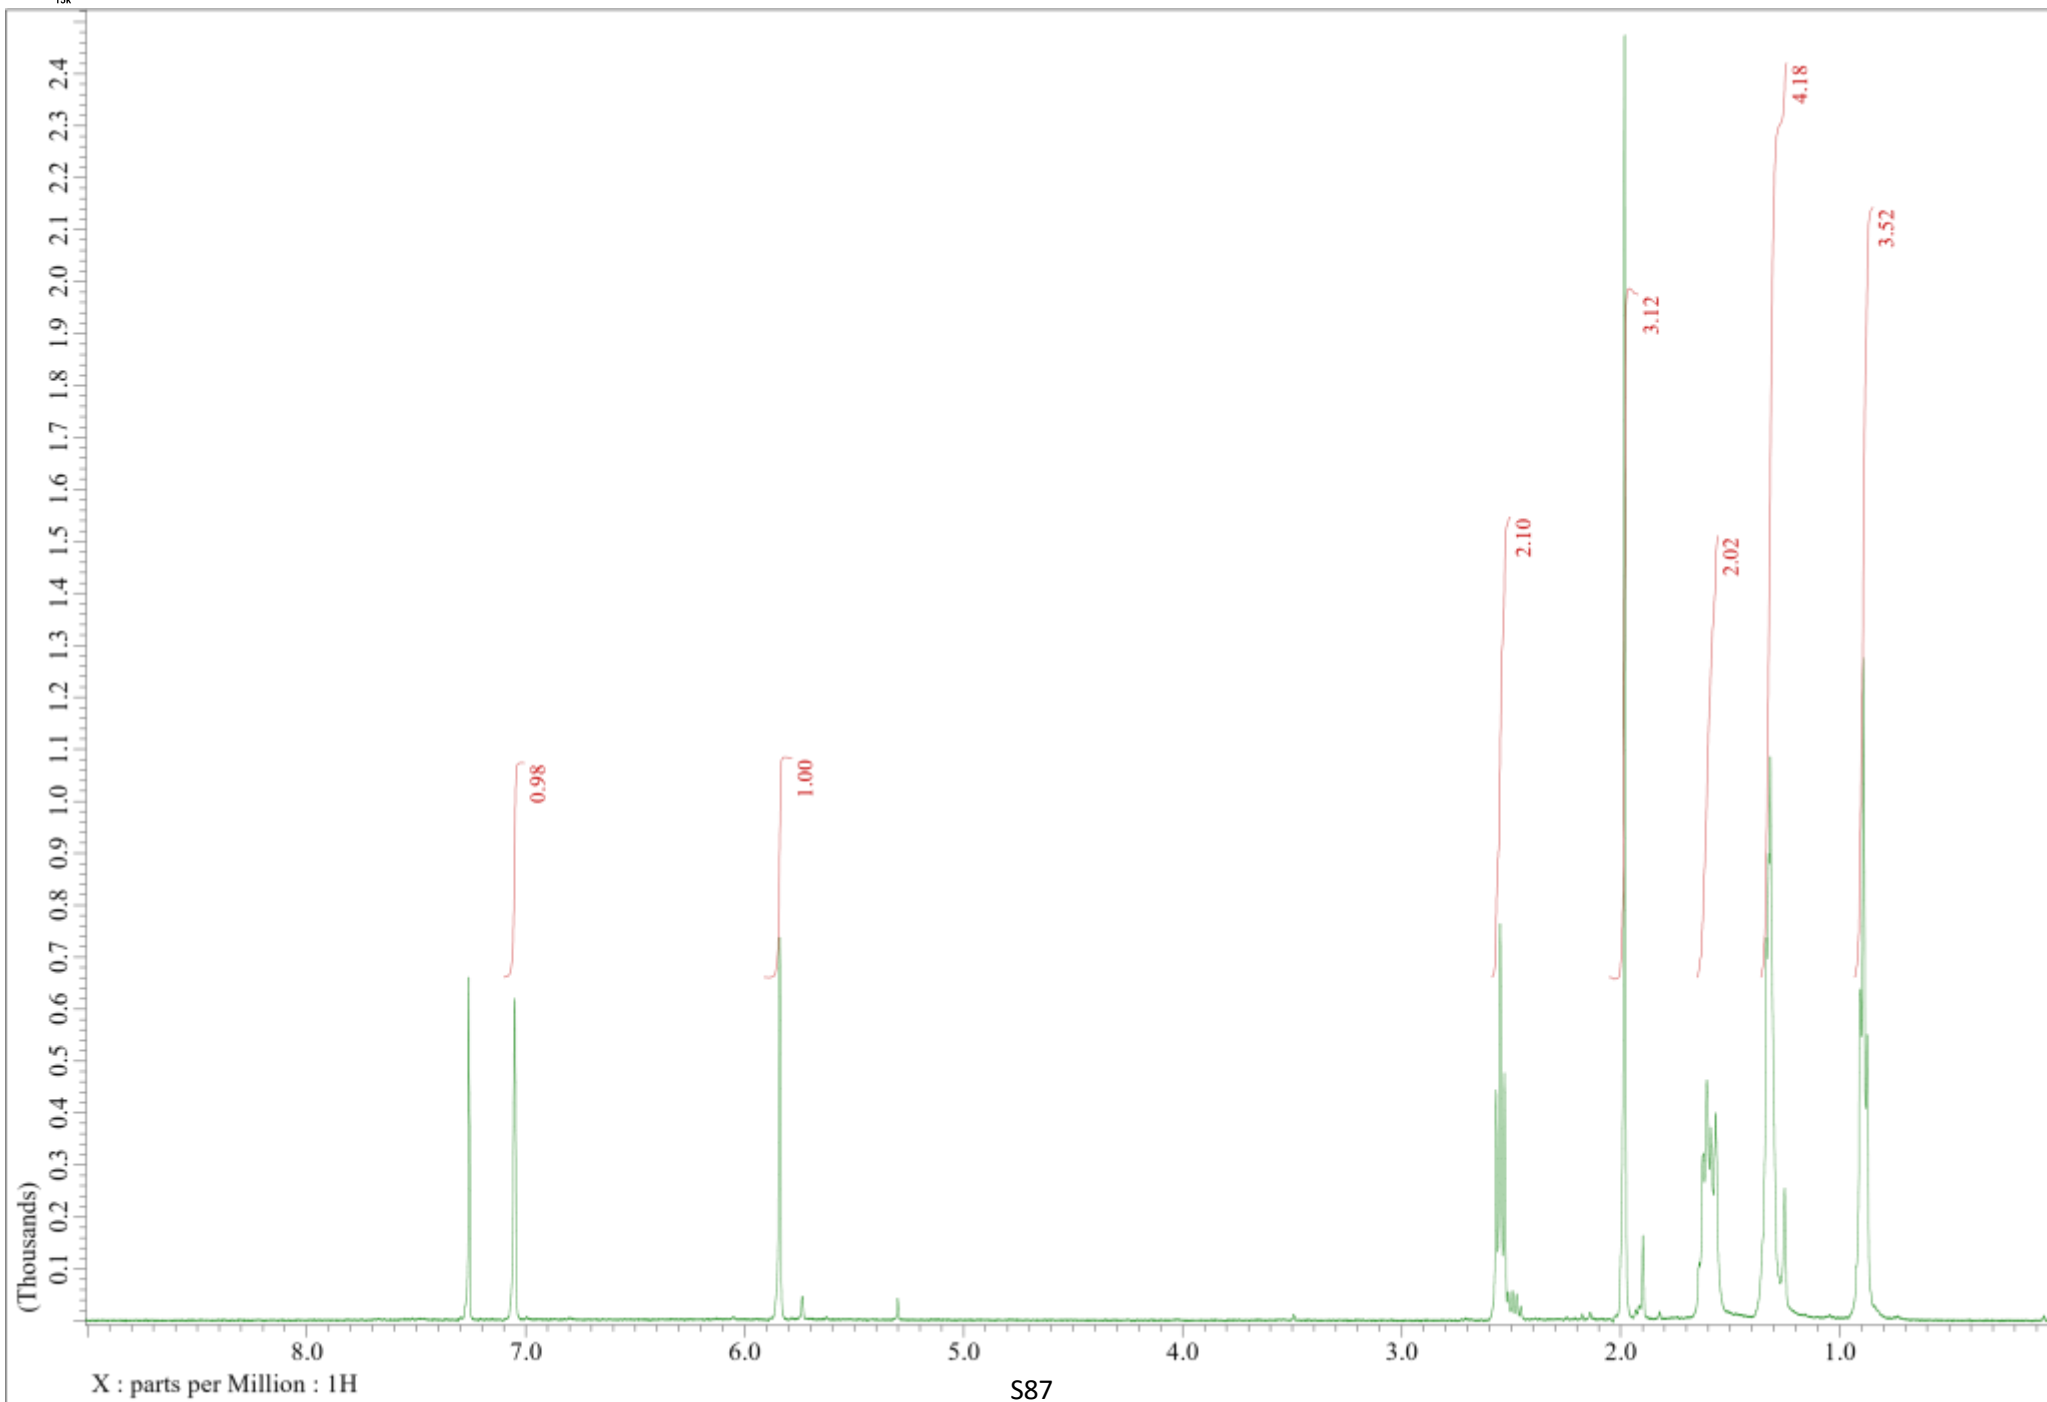

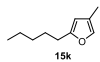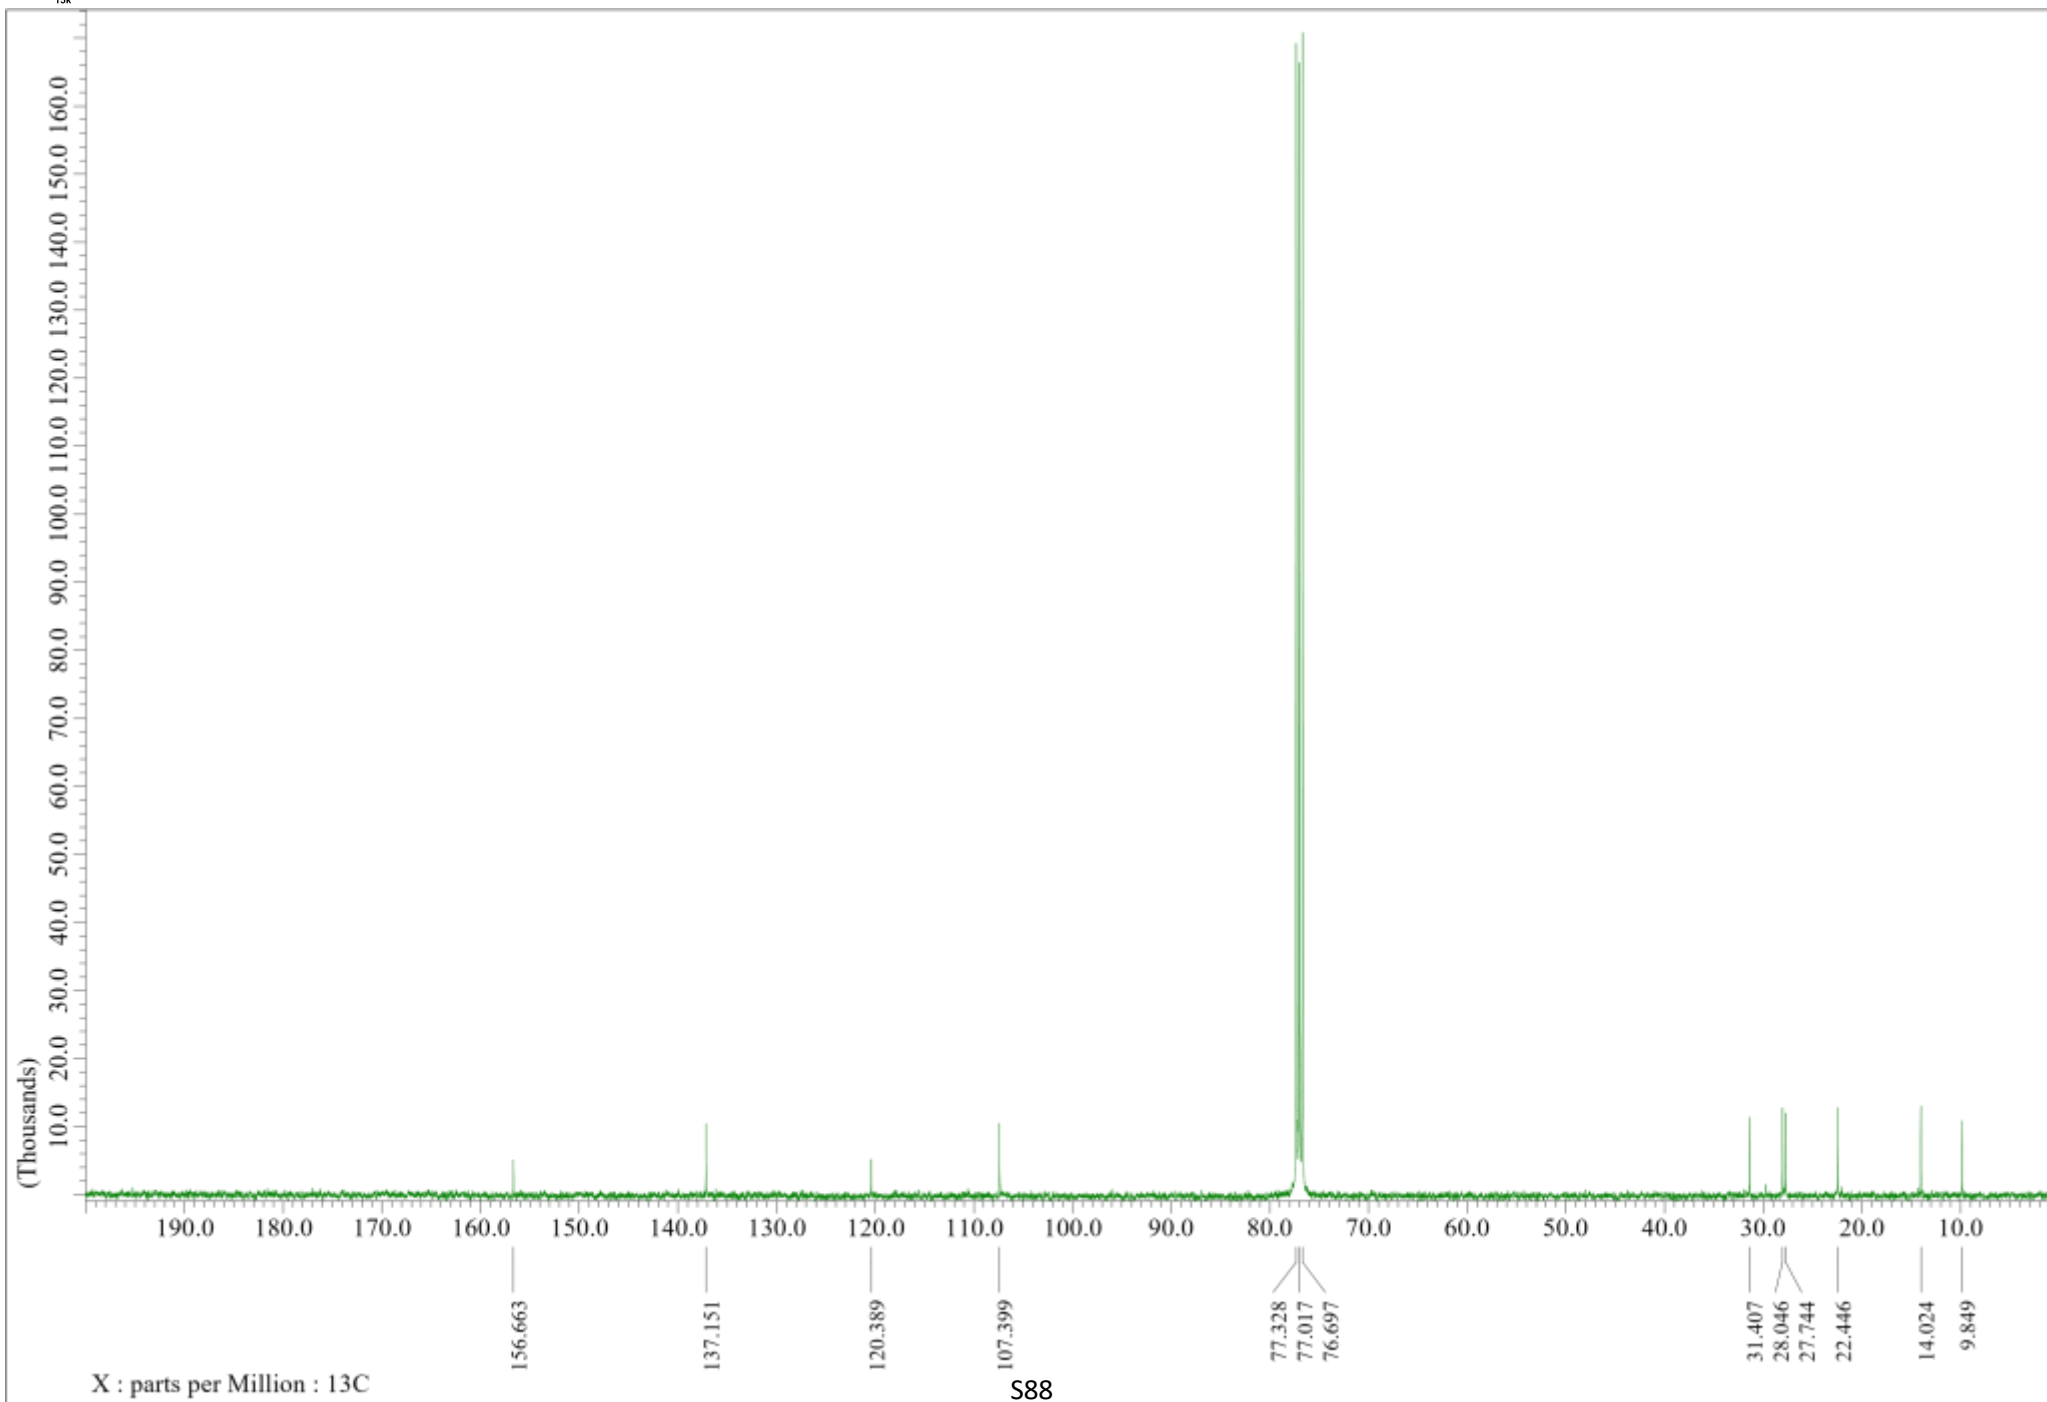



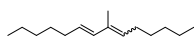

161

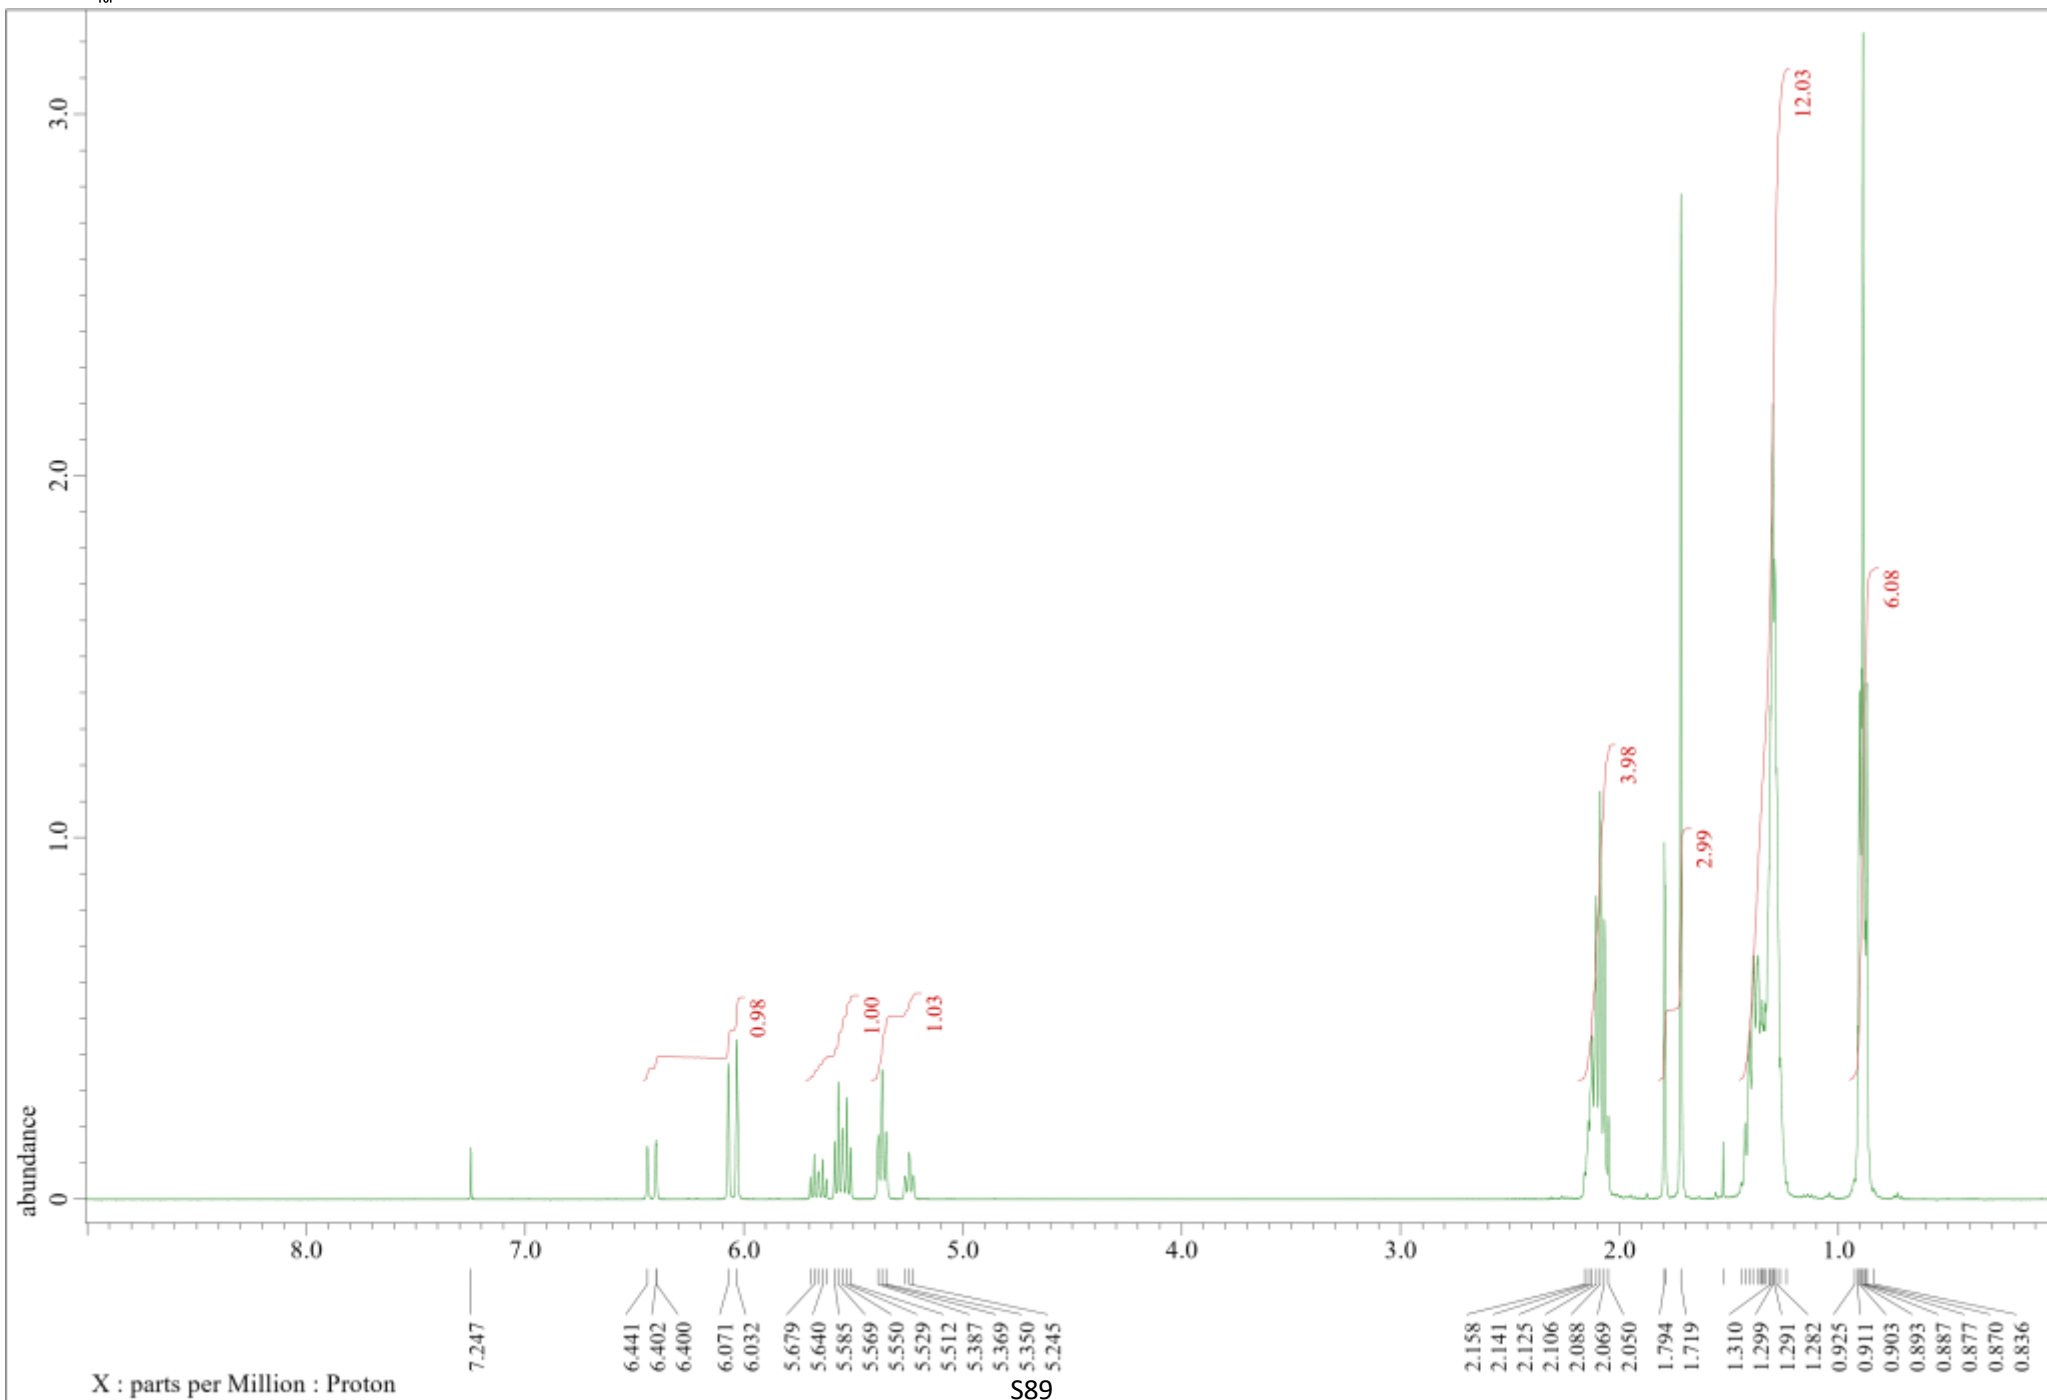

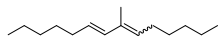

16l

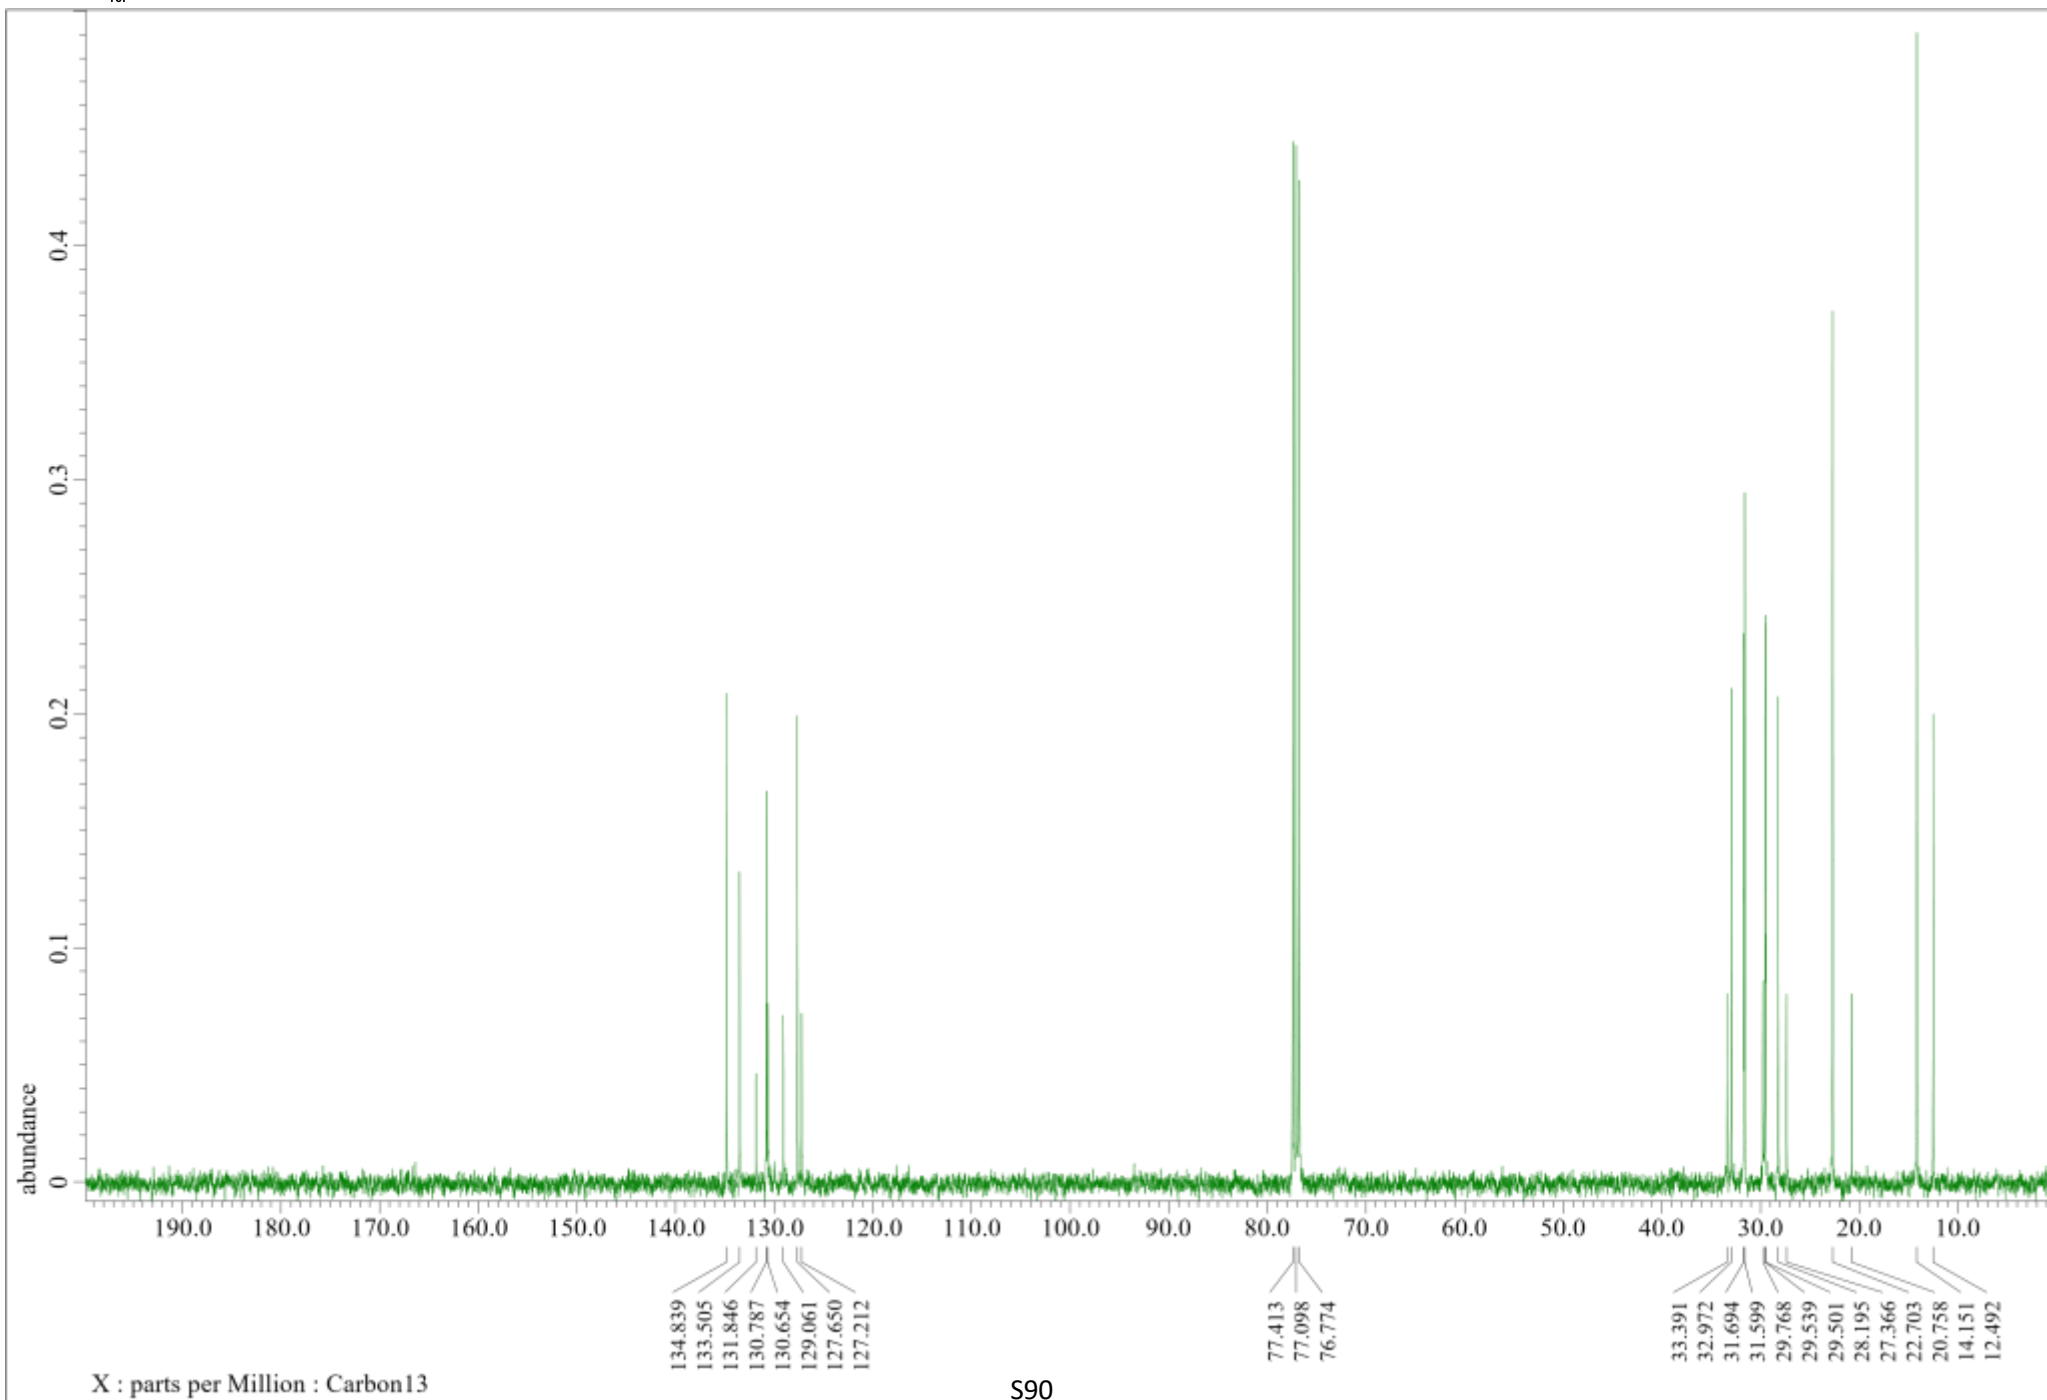

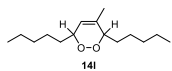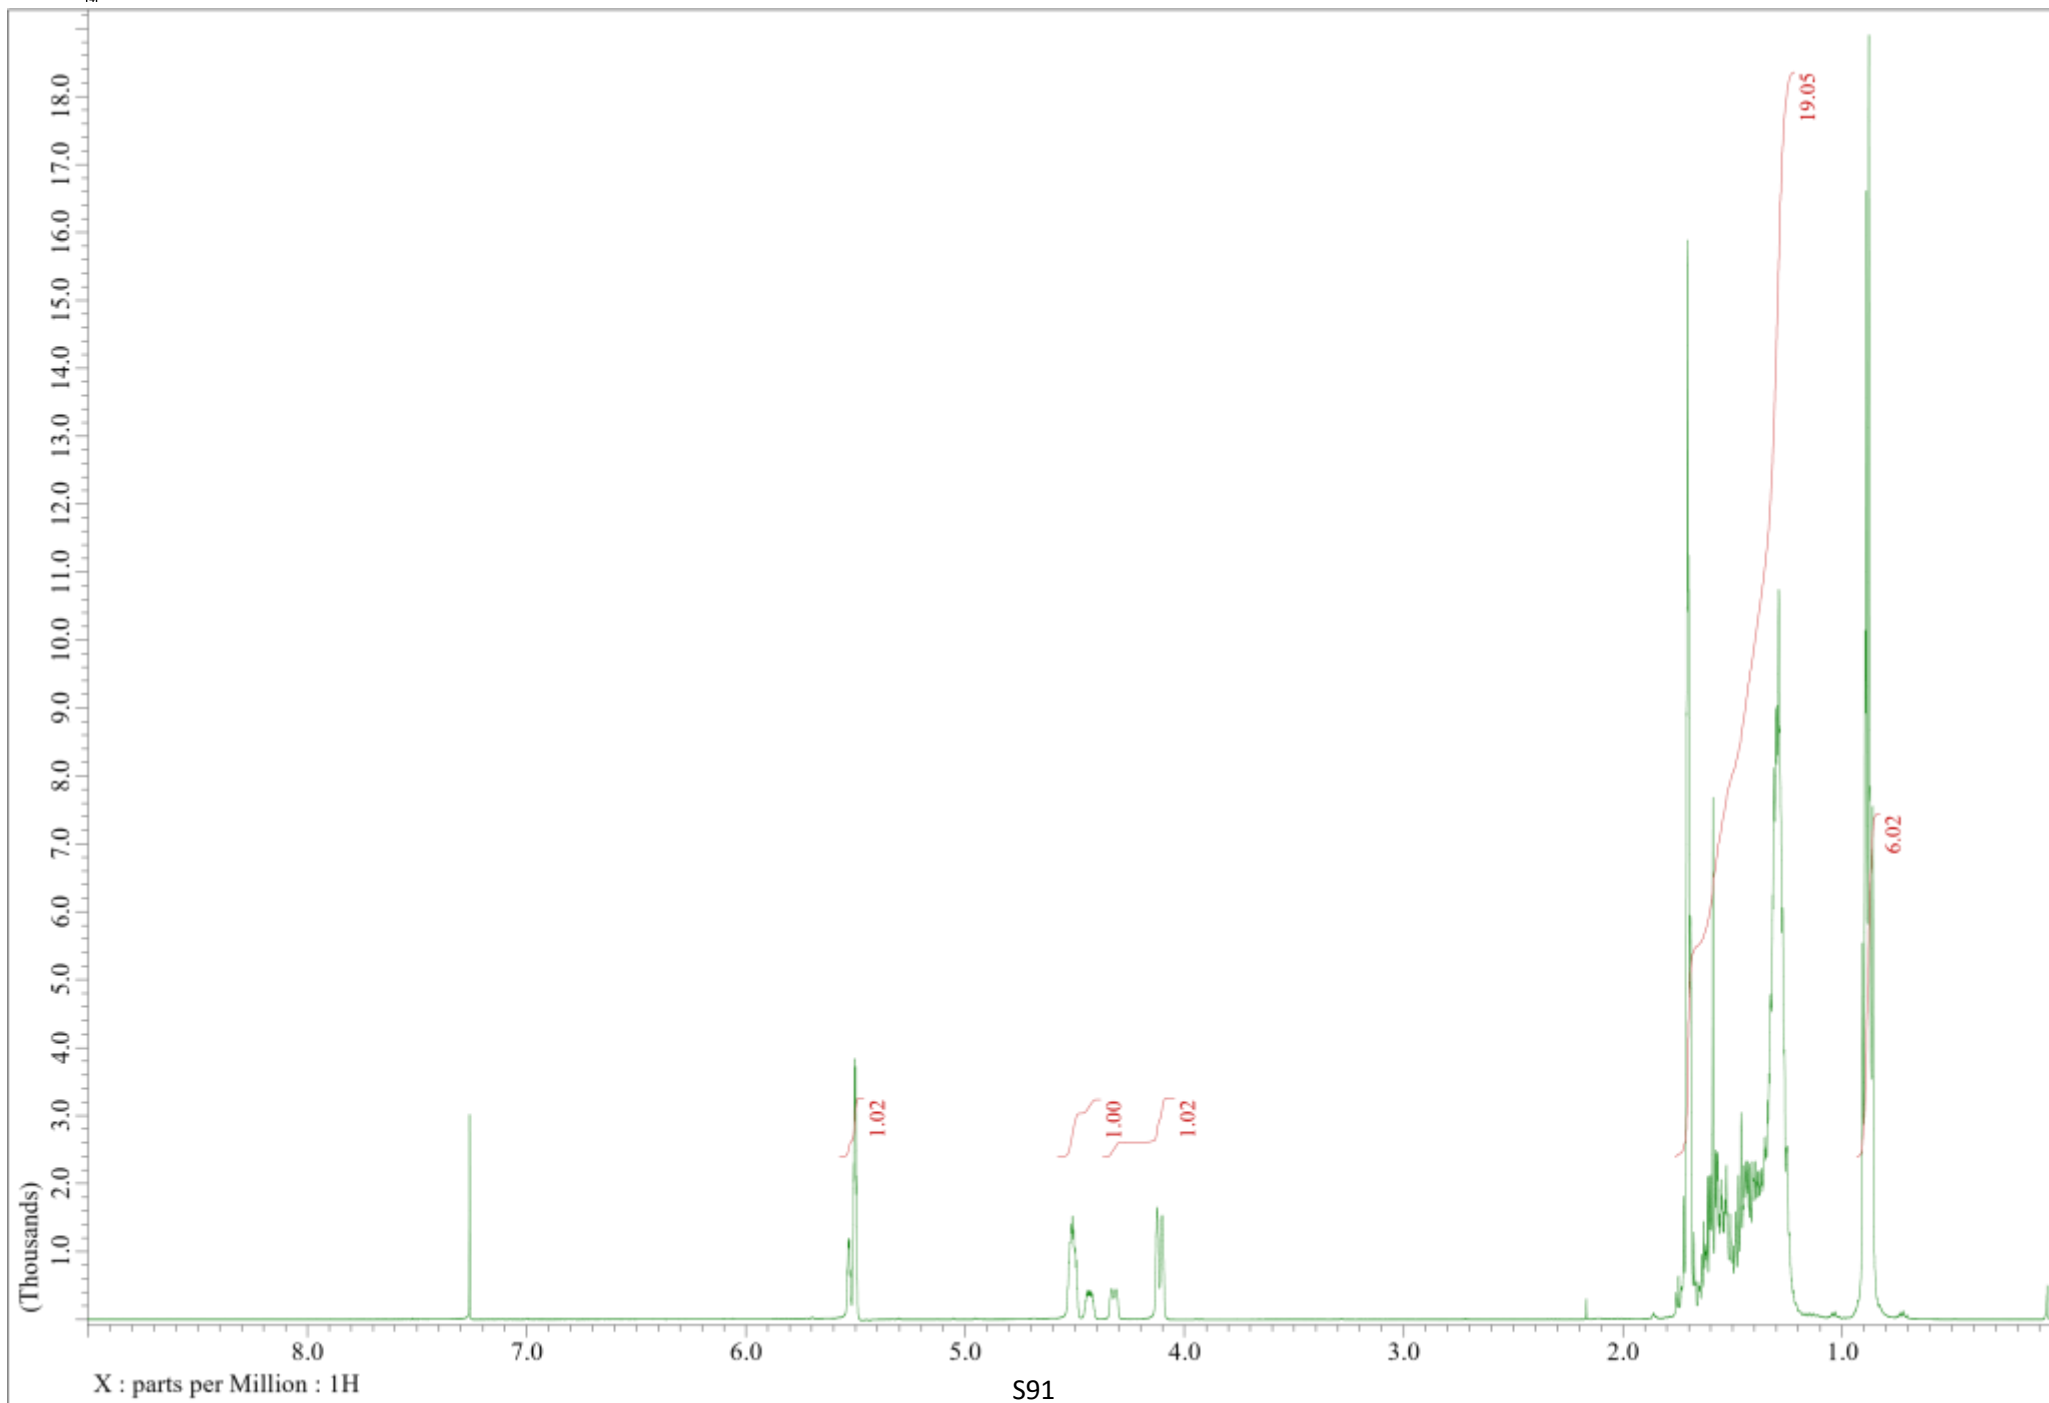

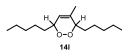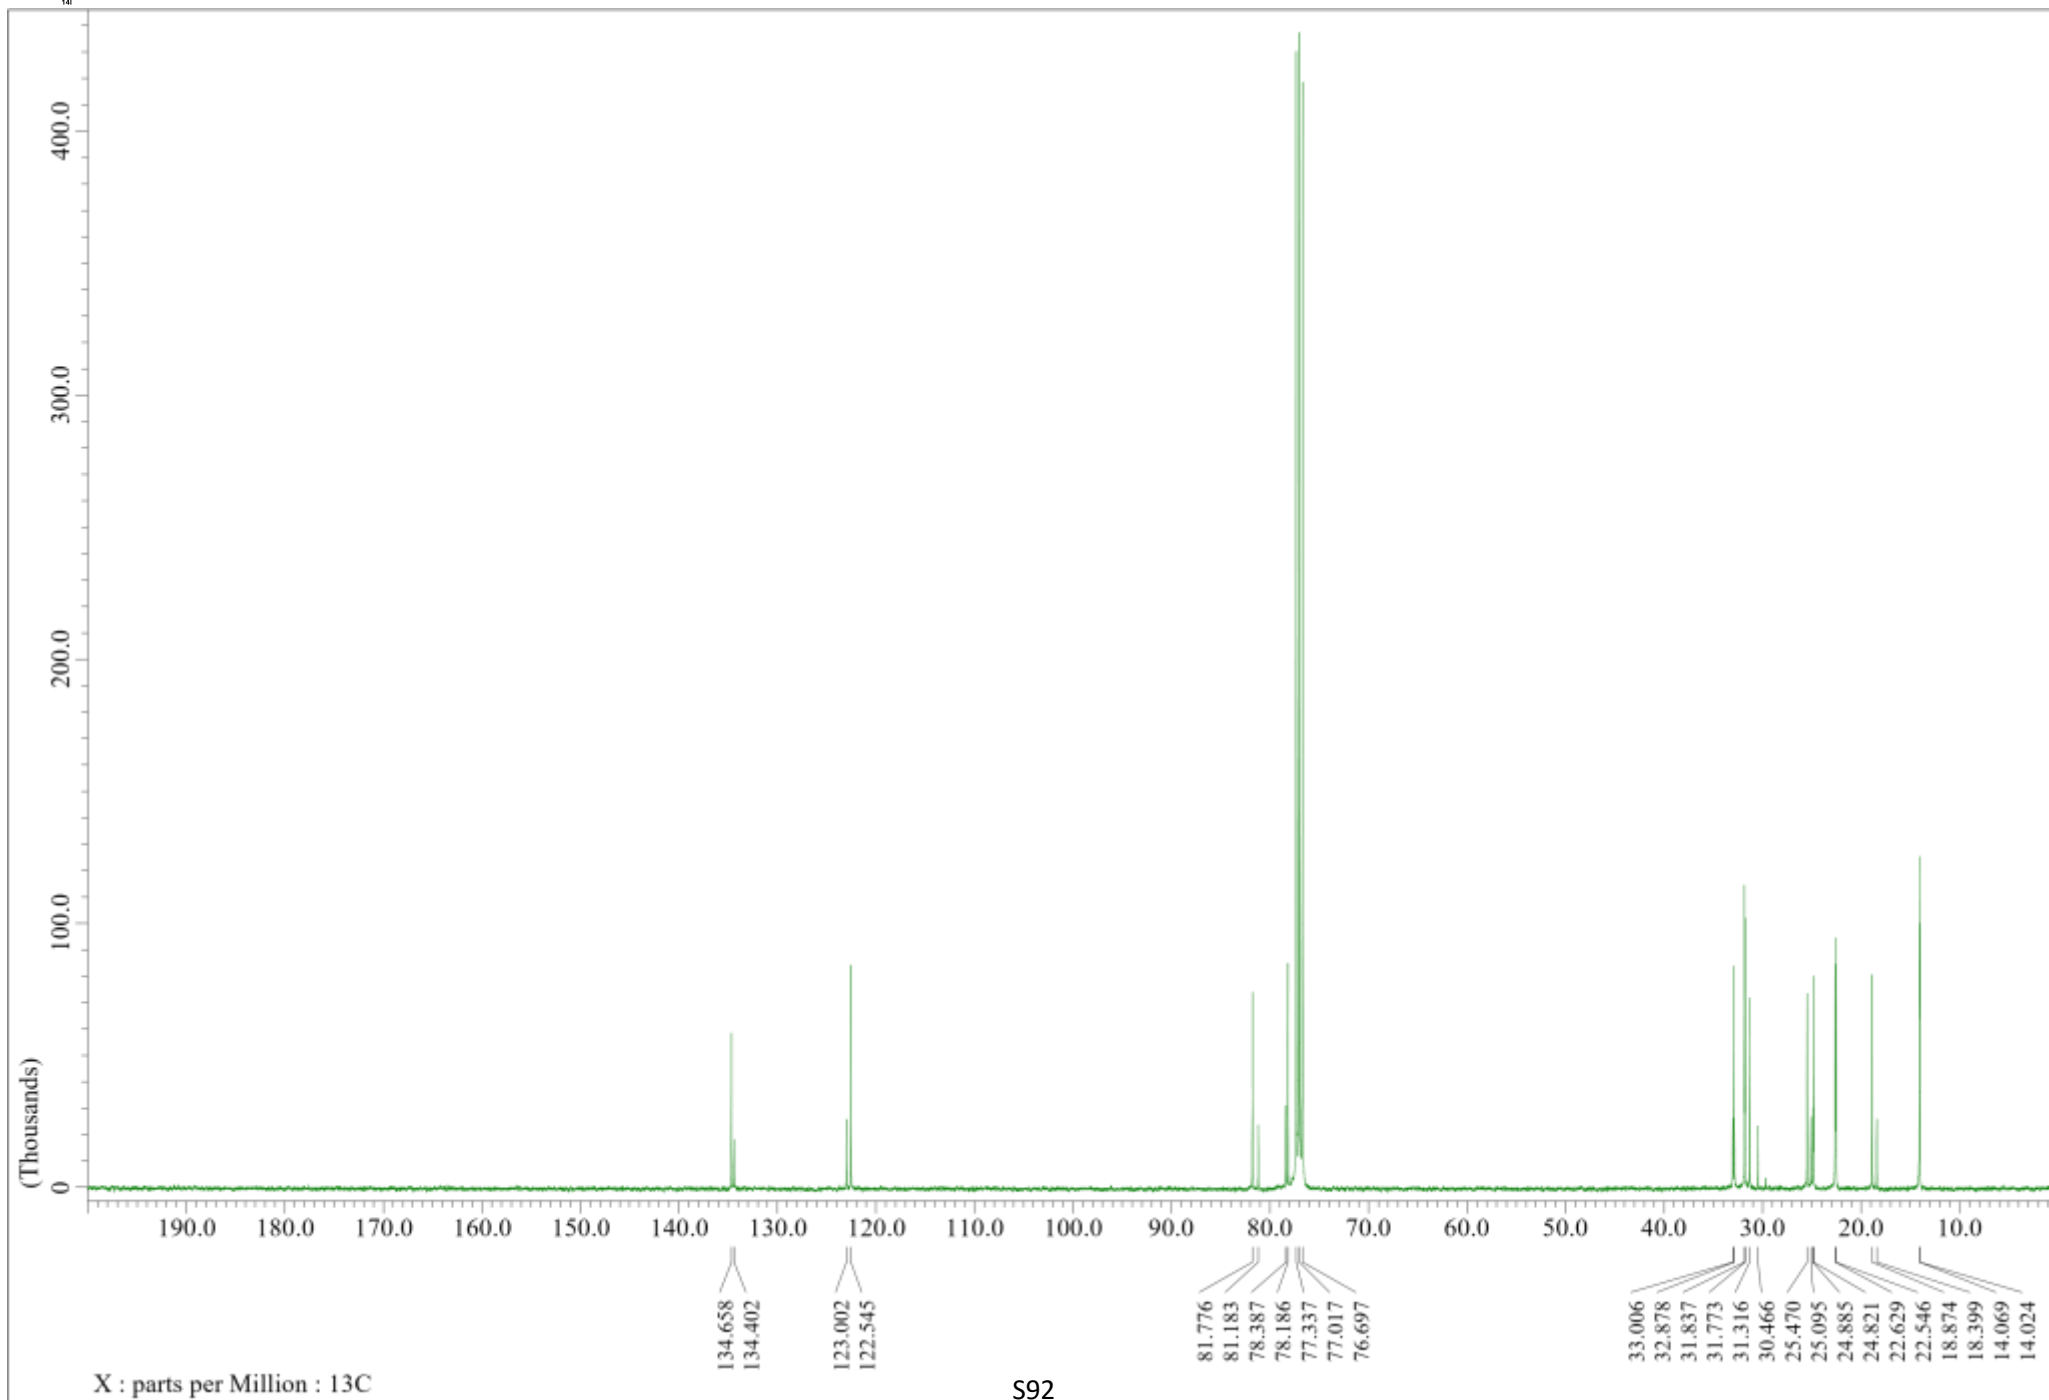

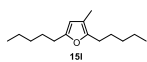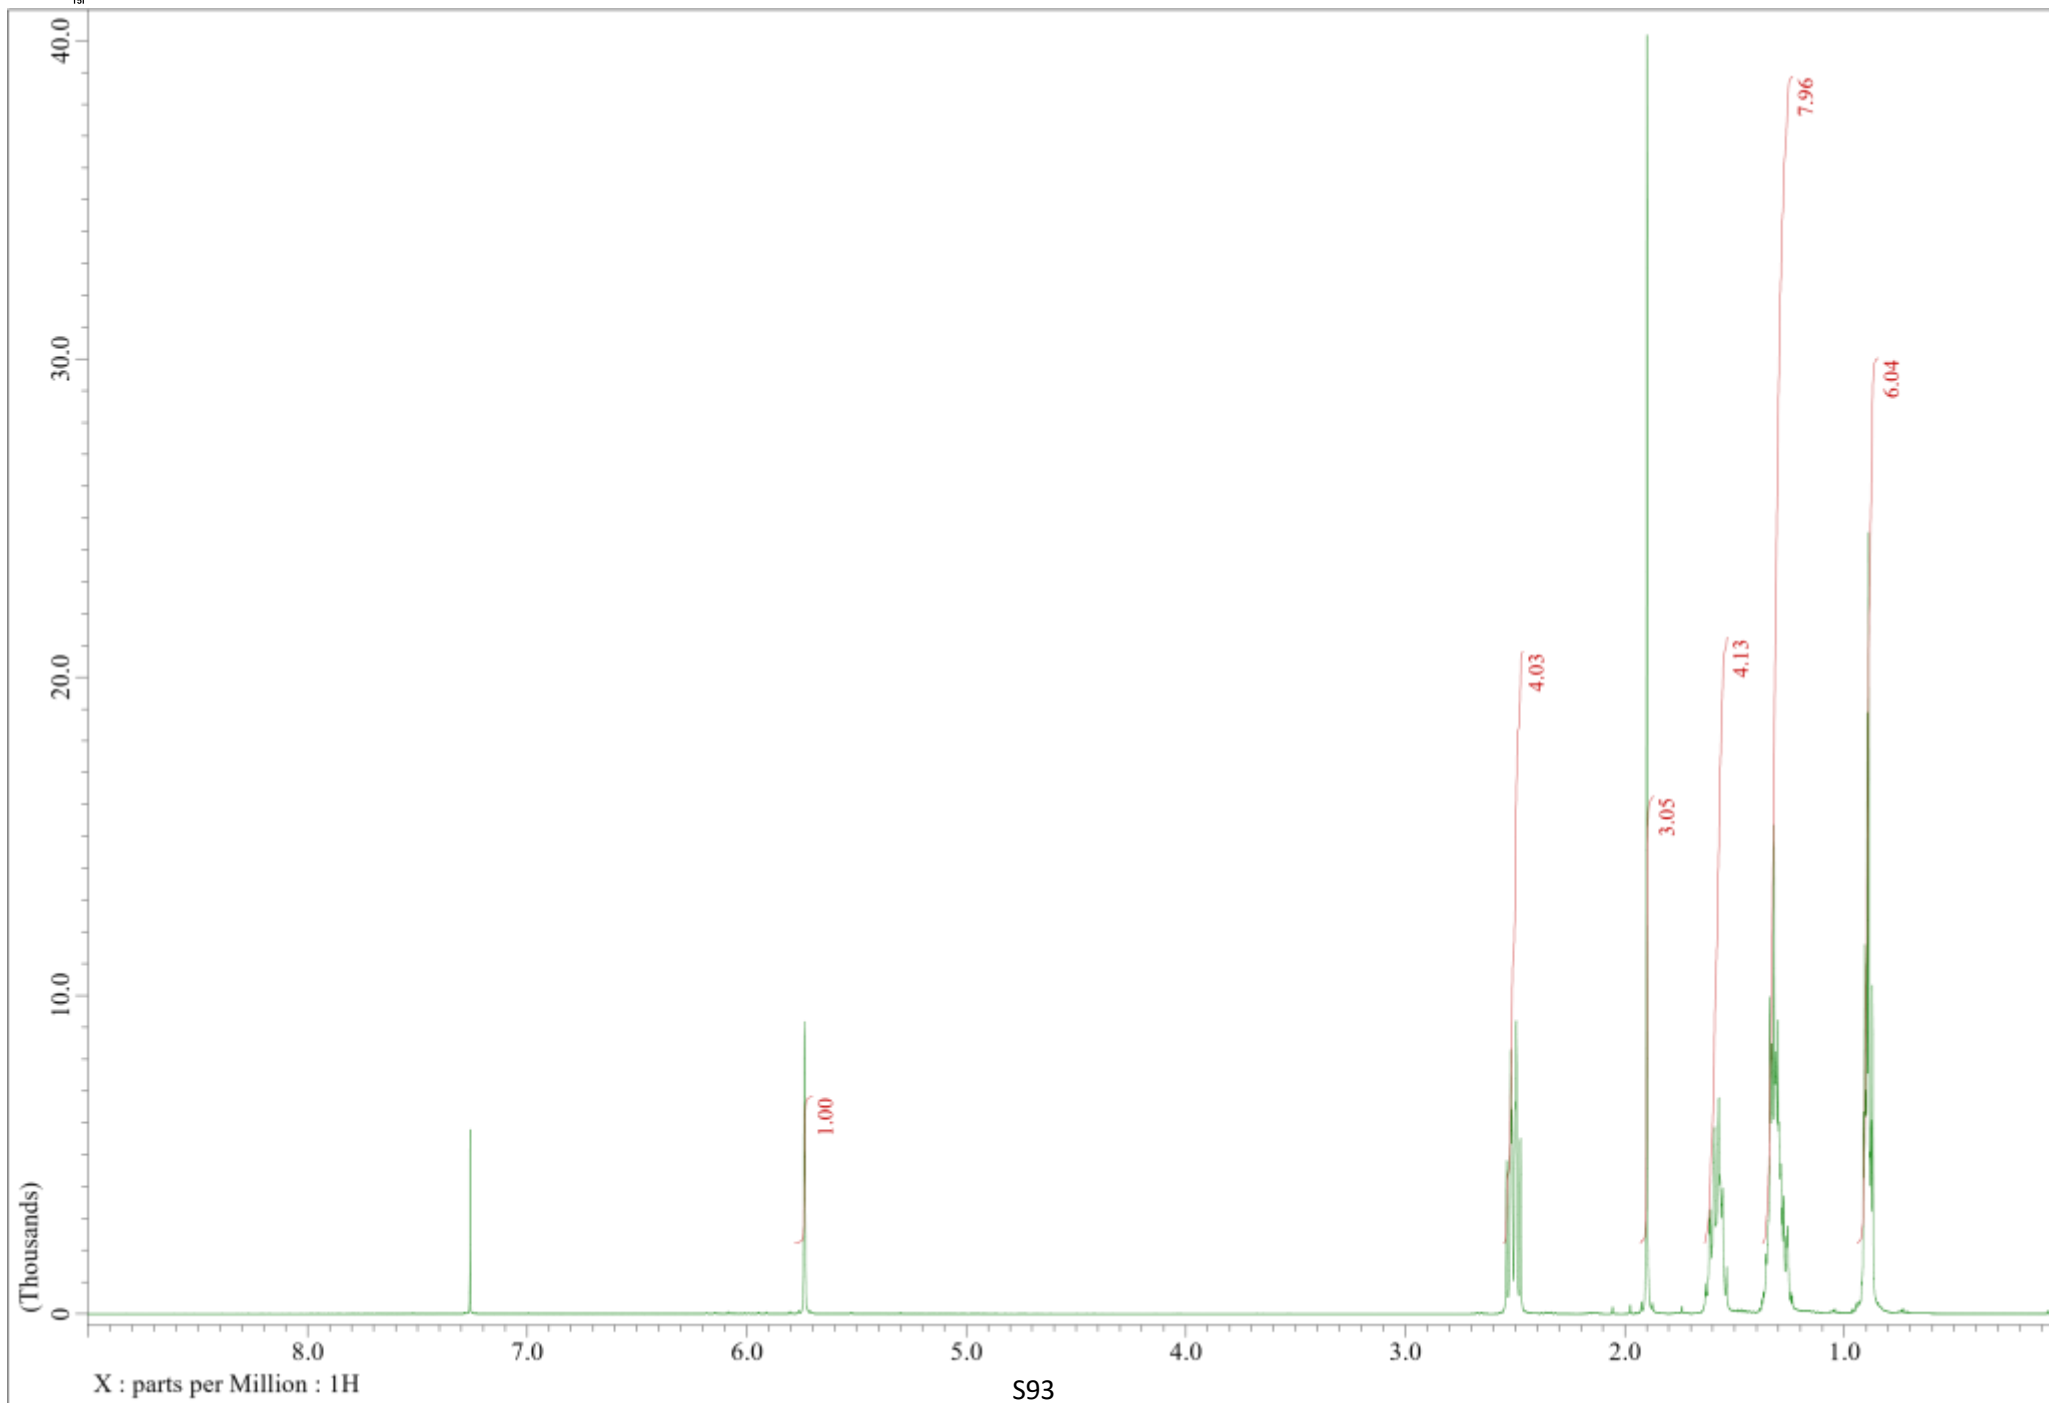

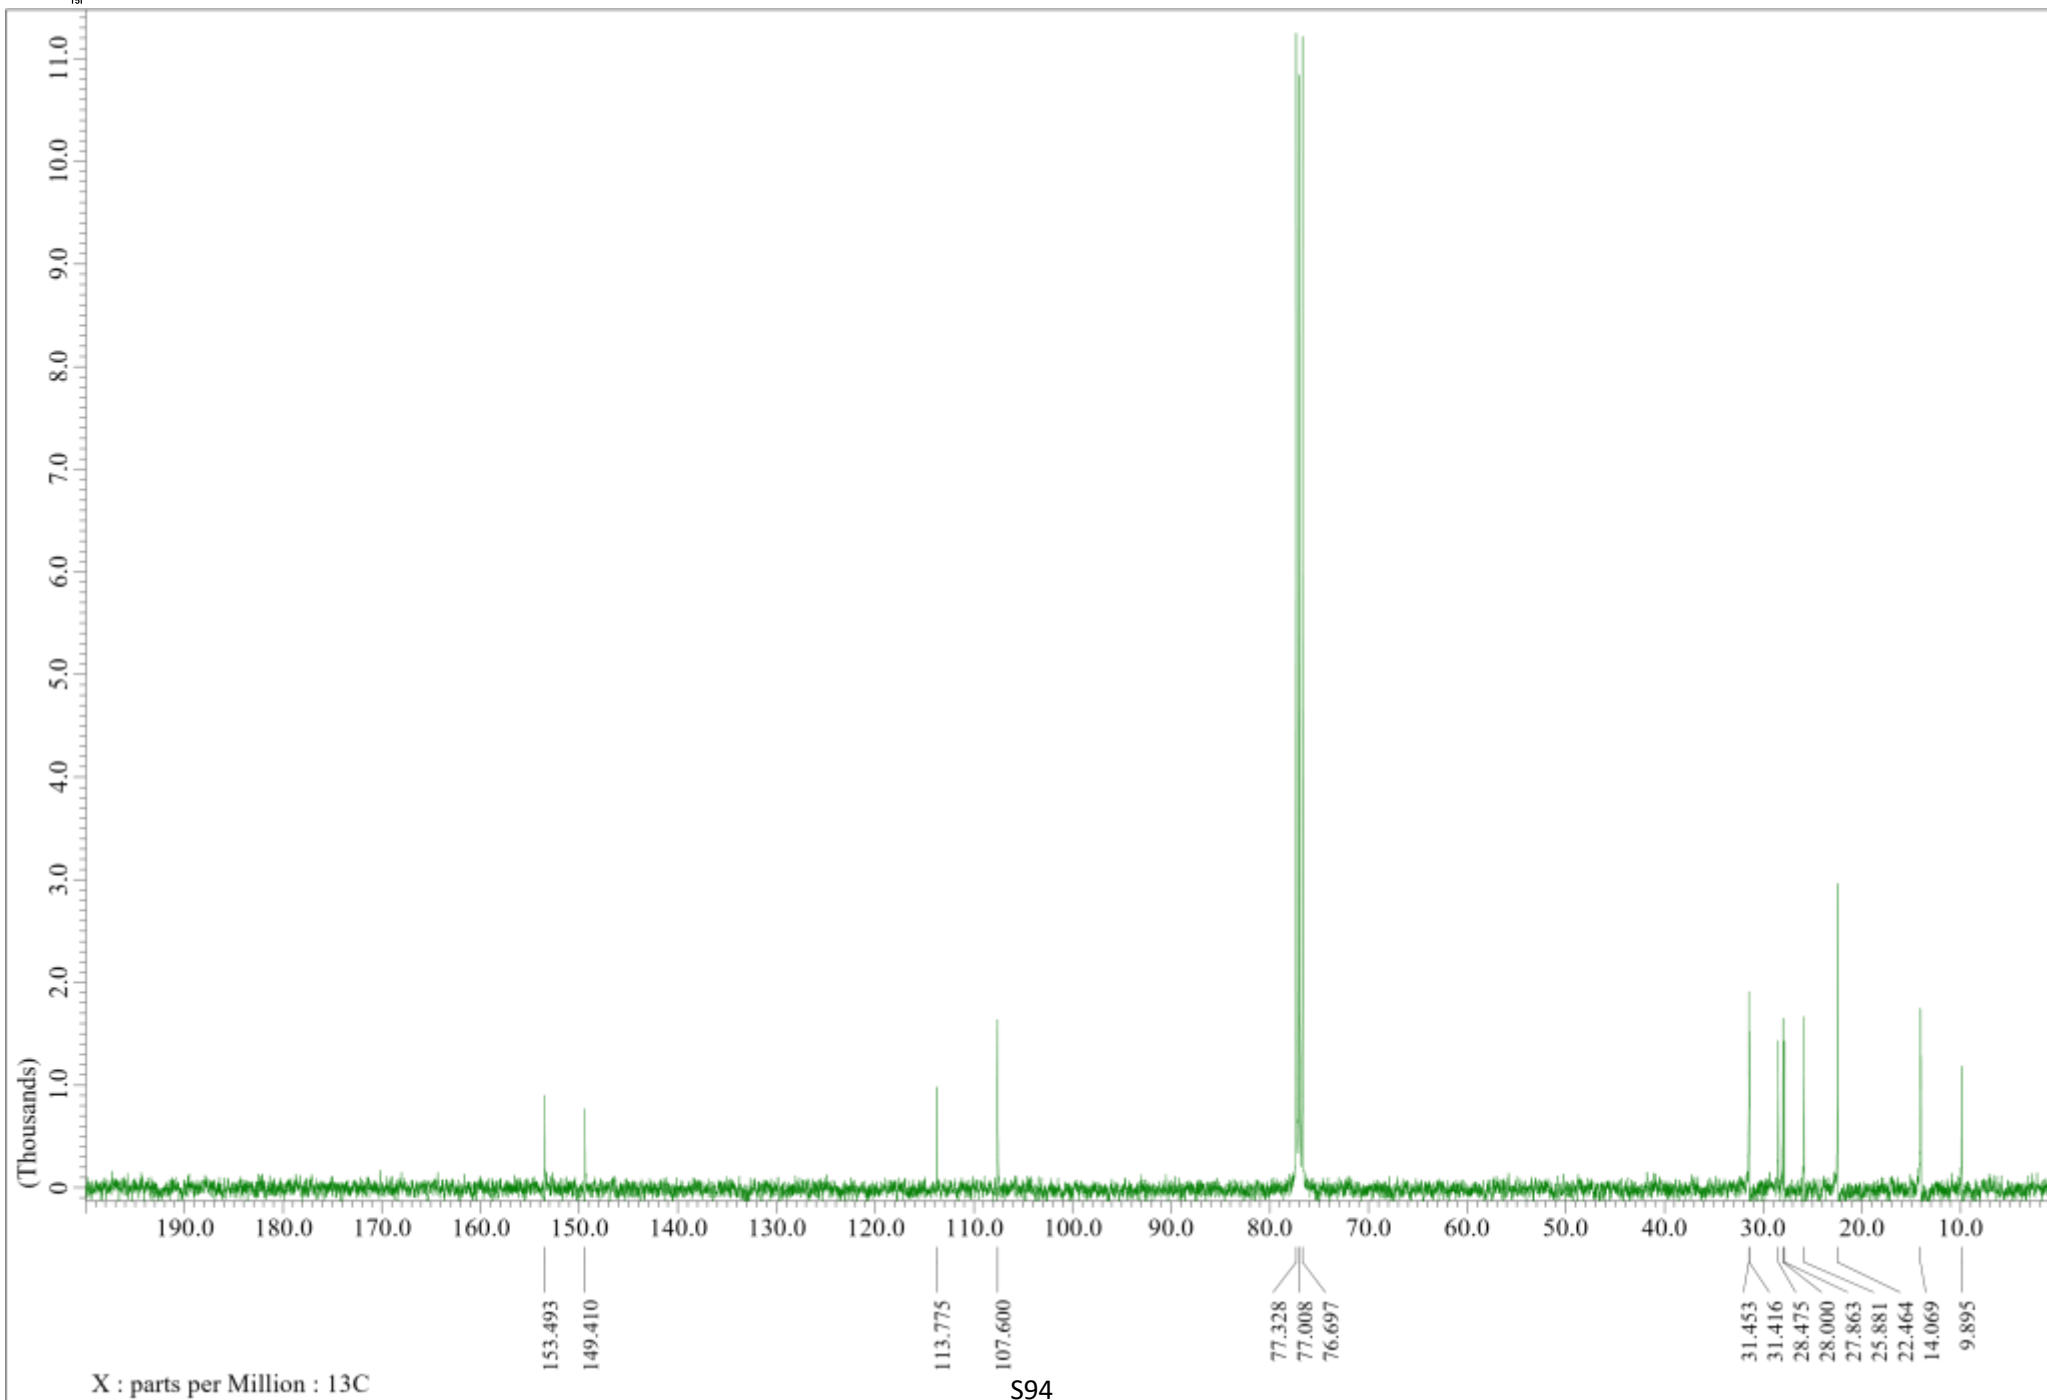

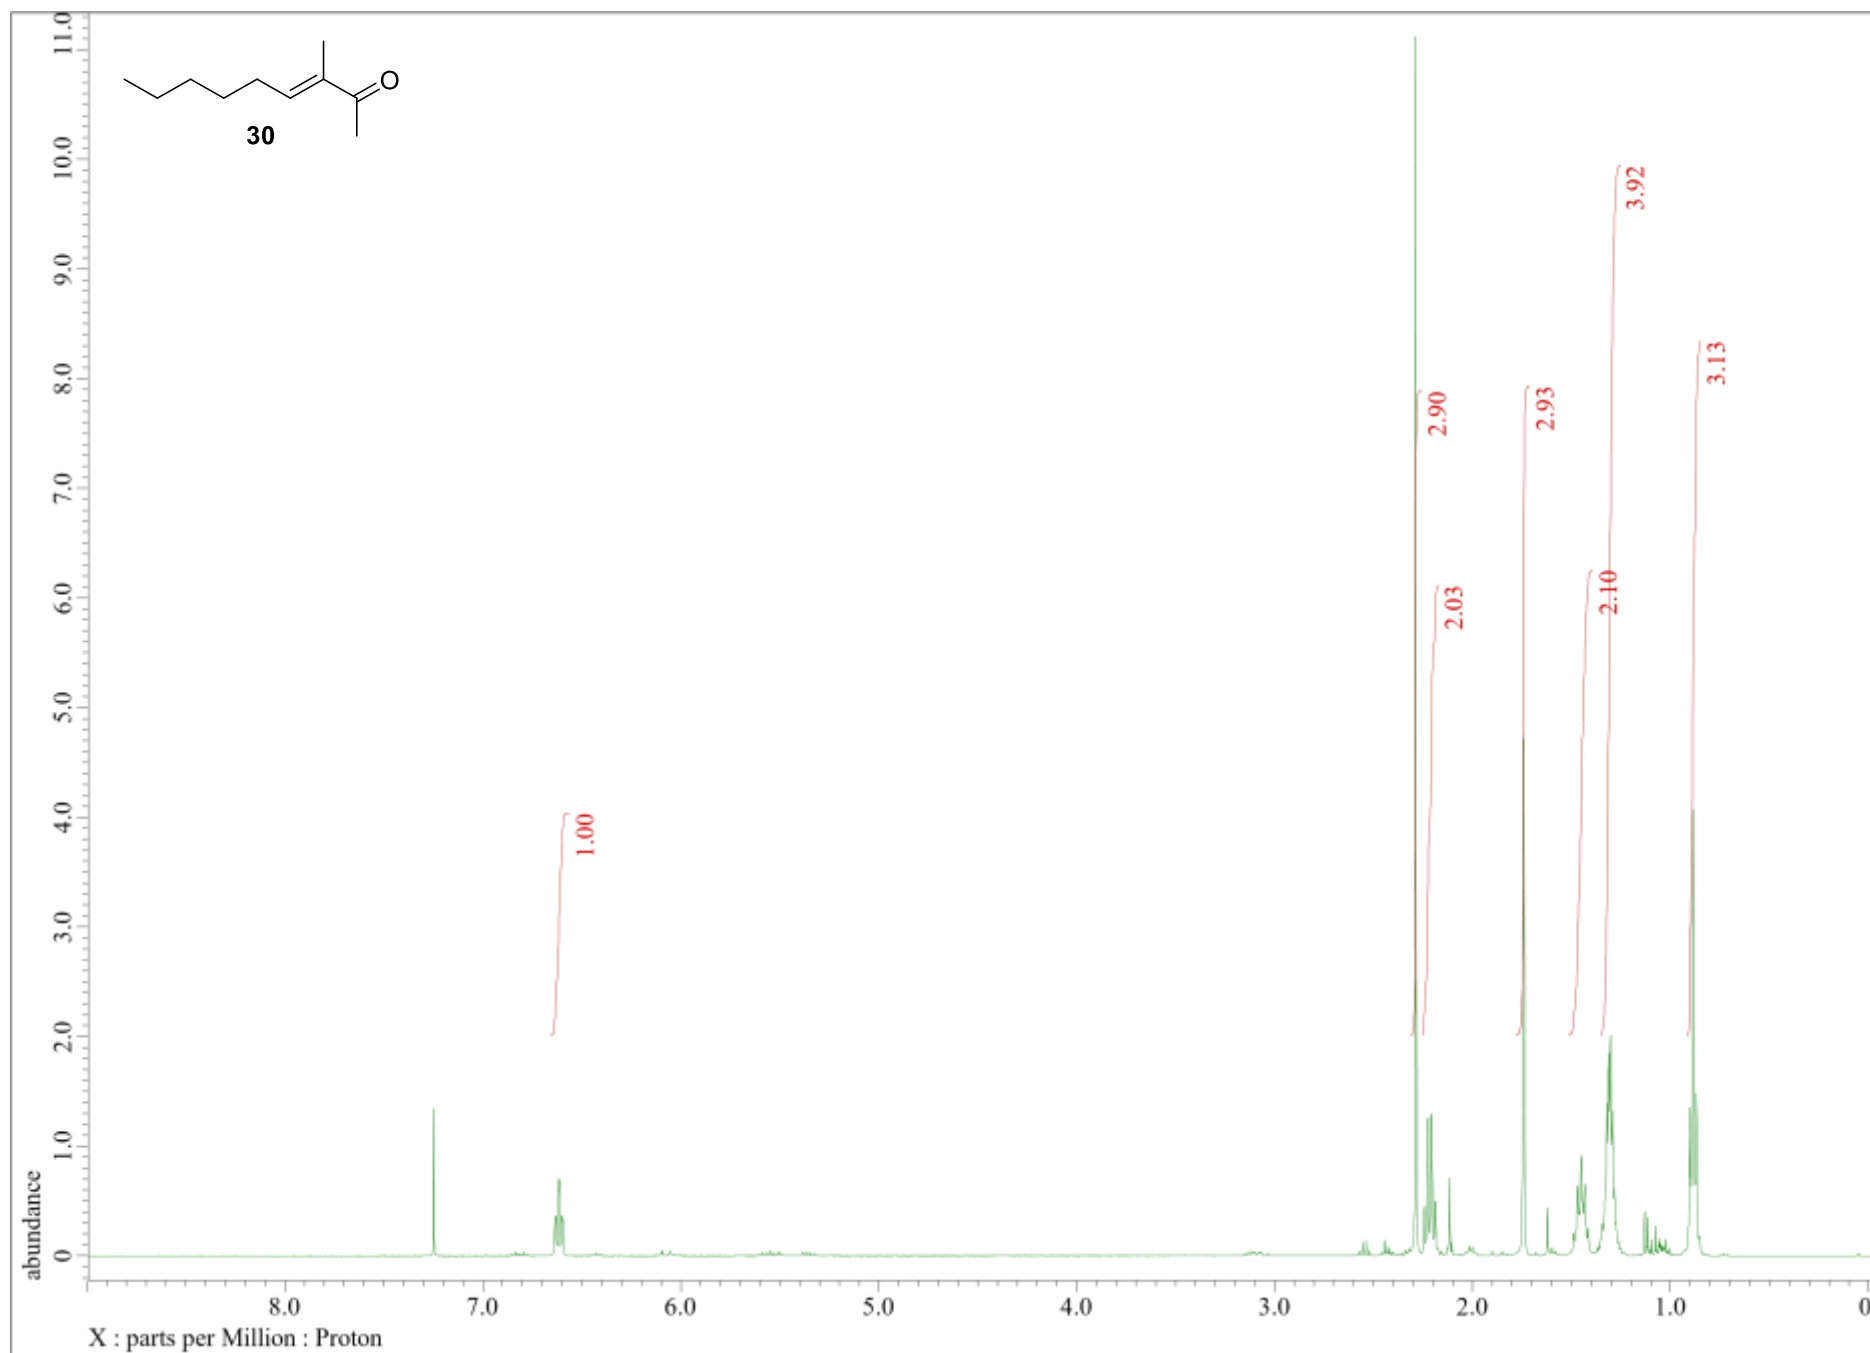

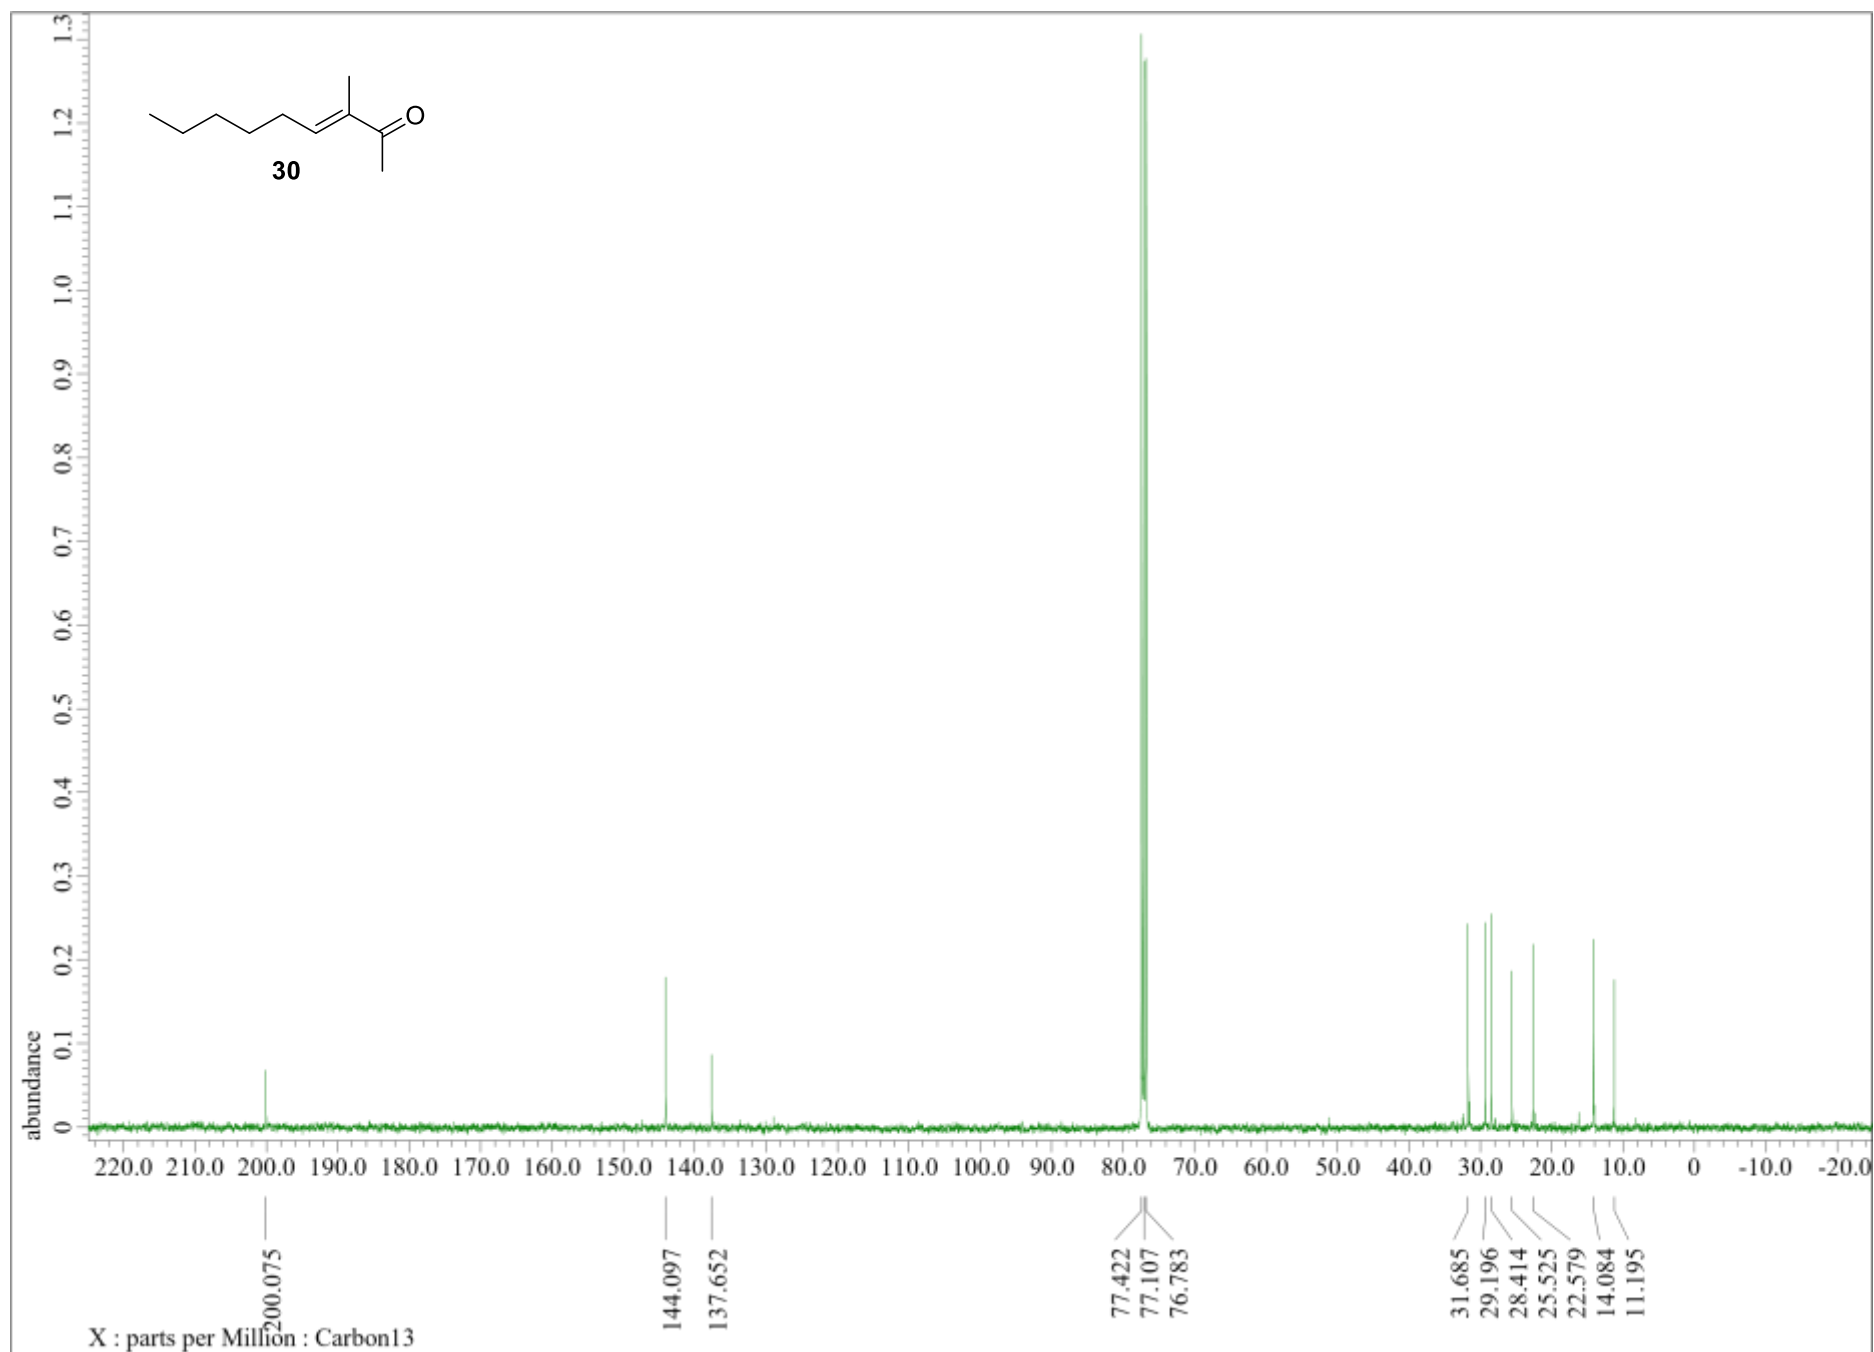



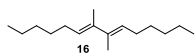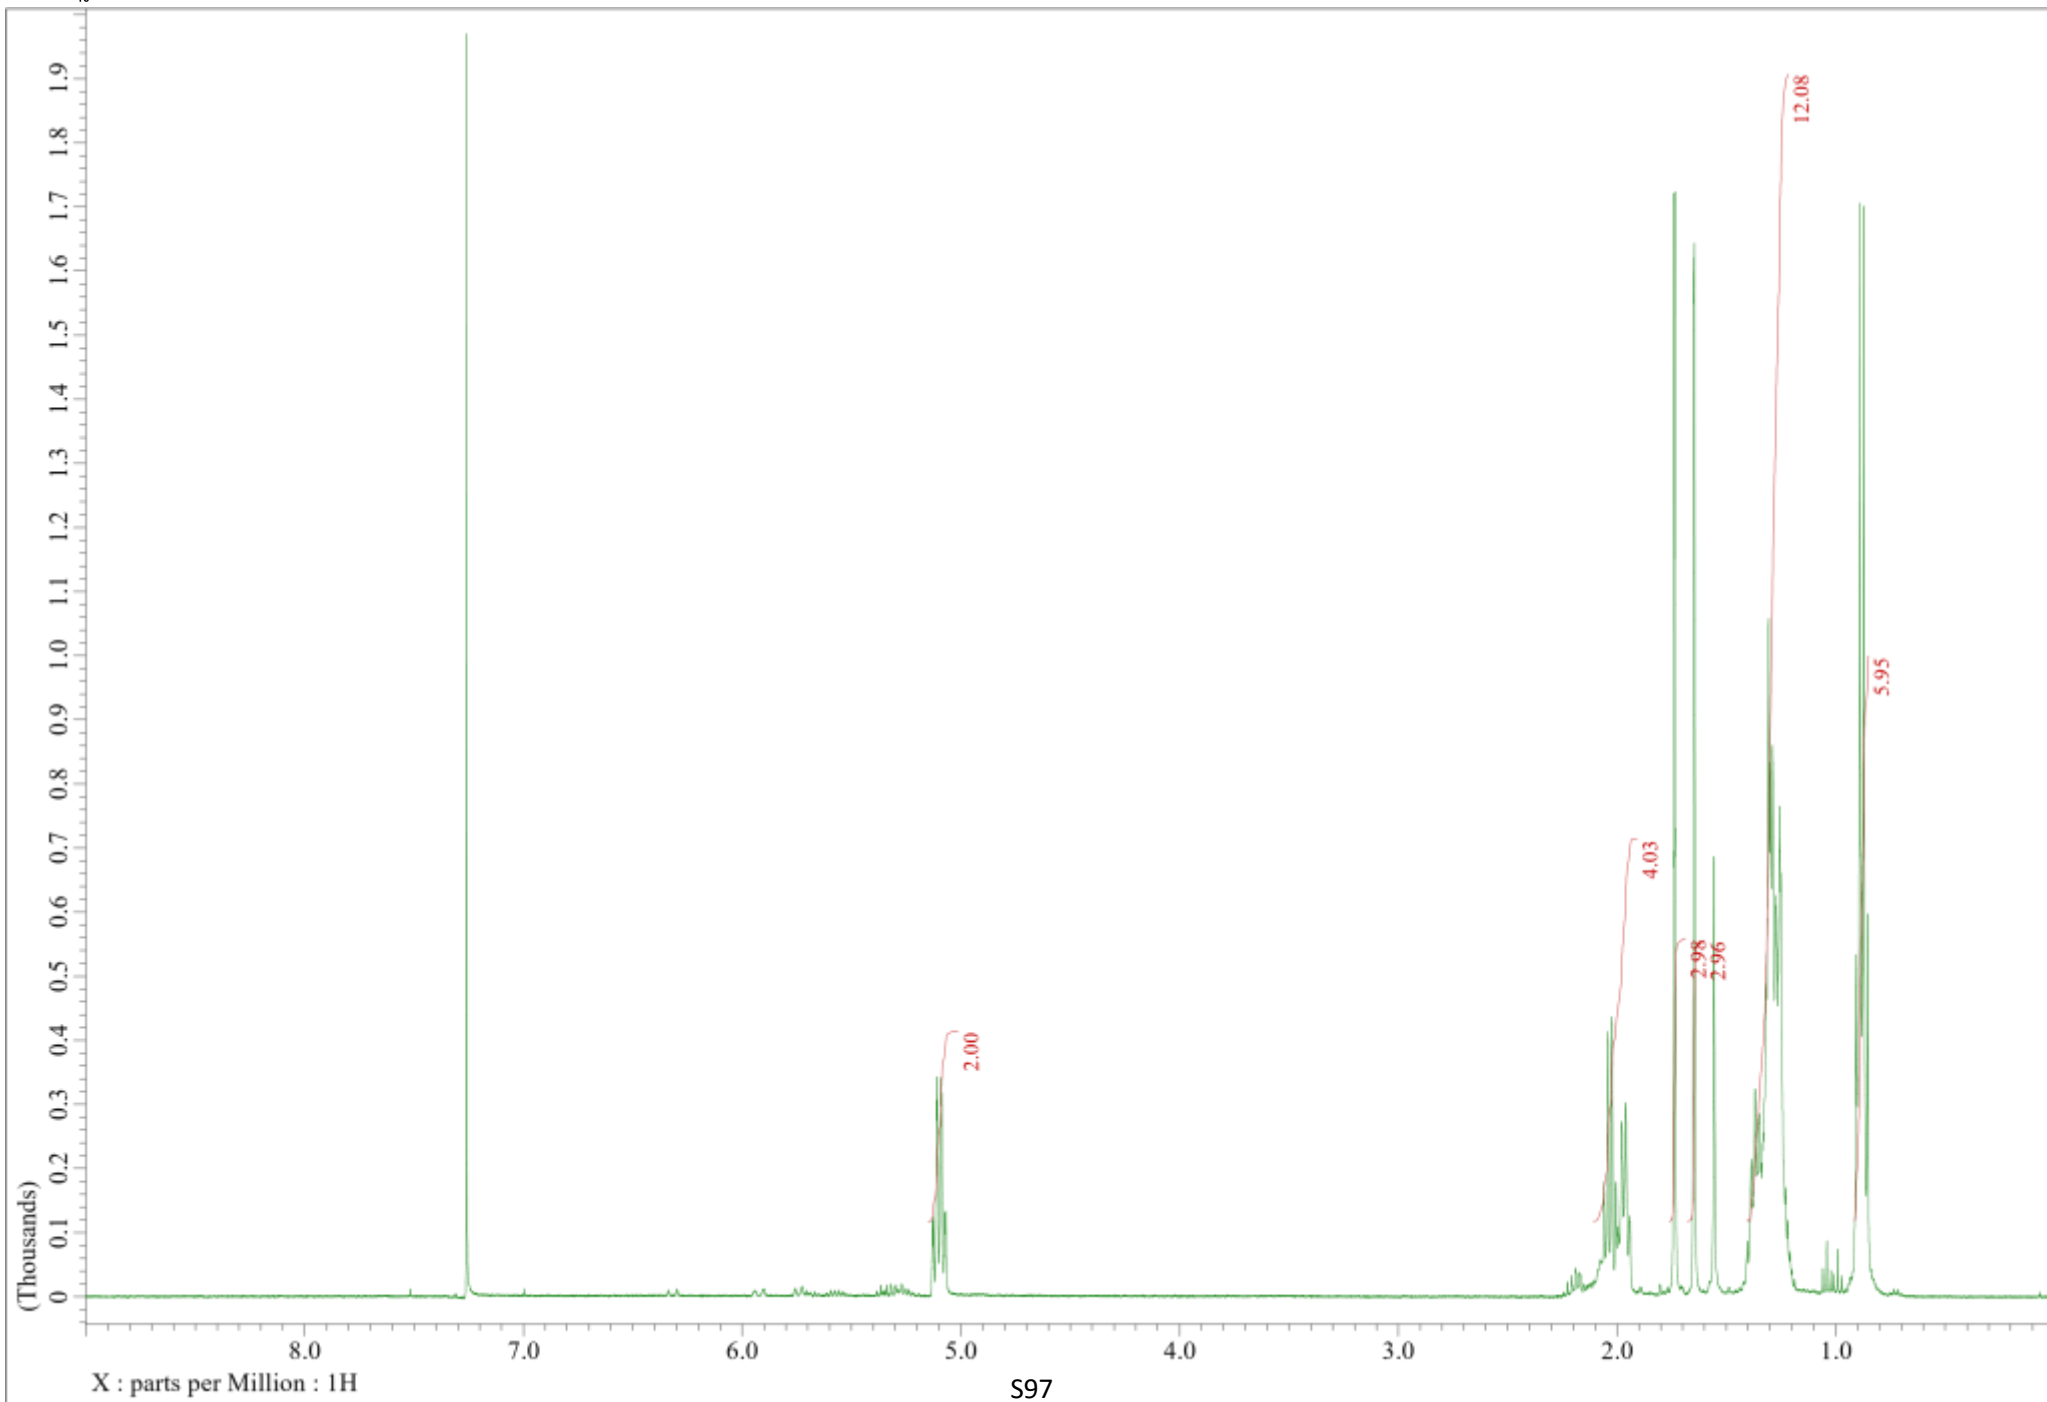

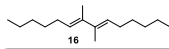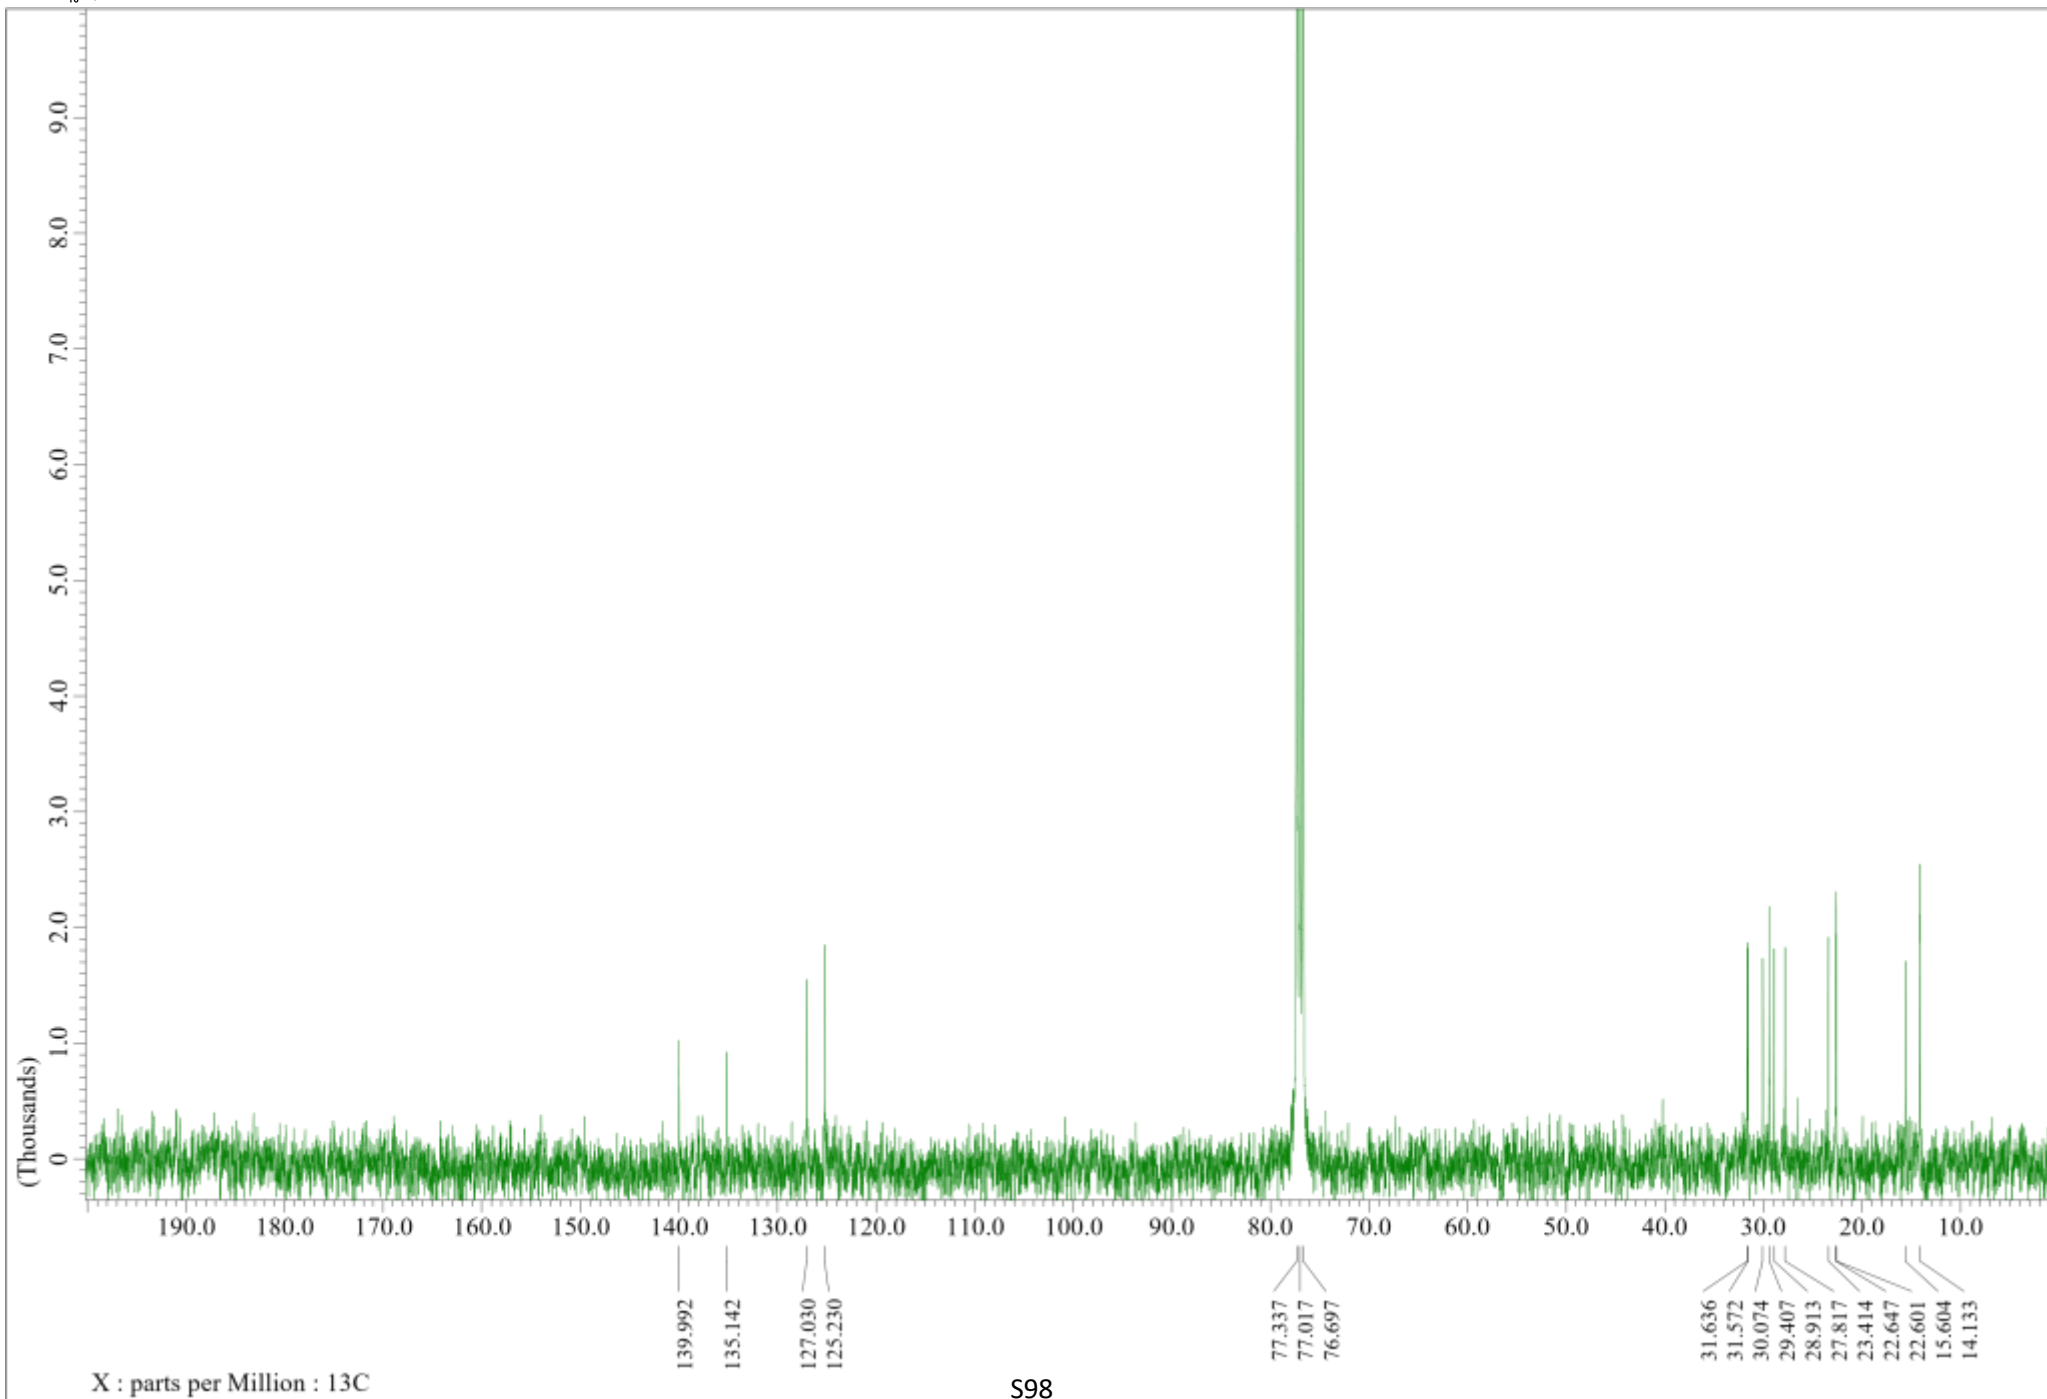

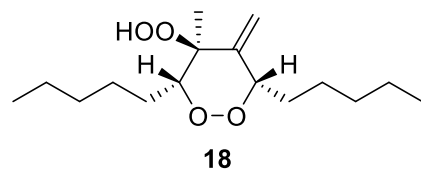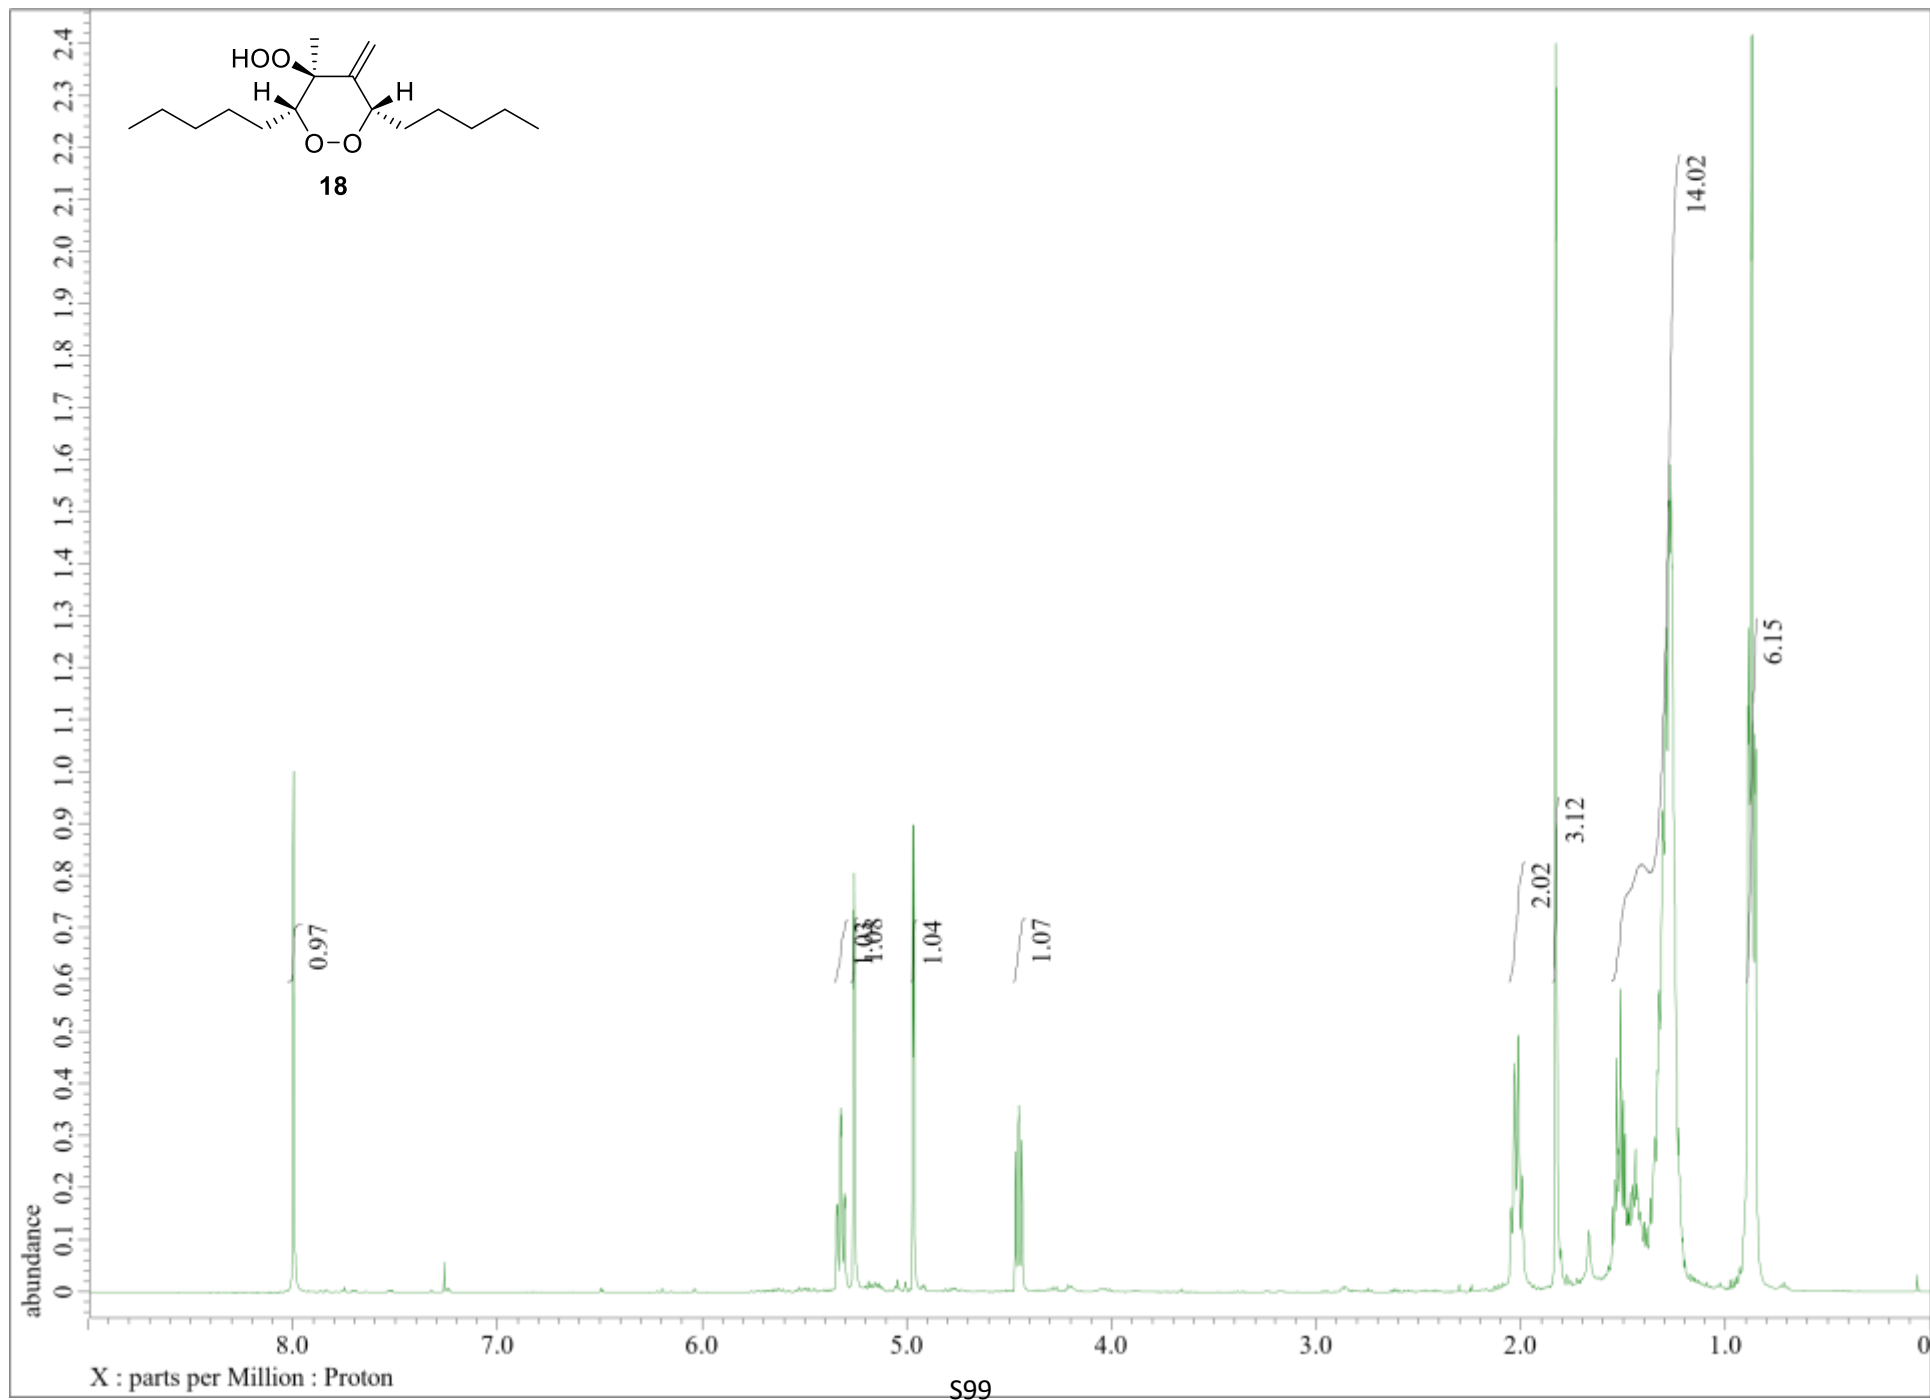

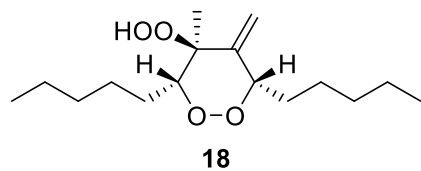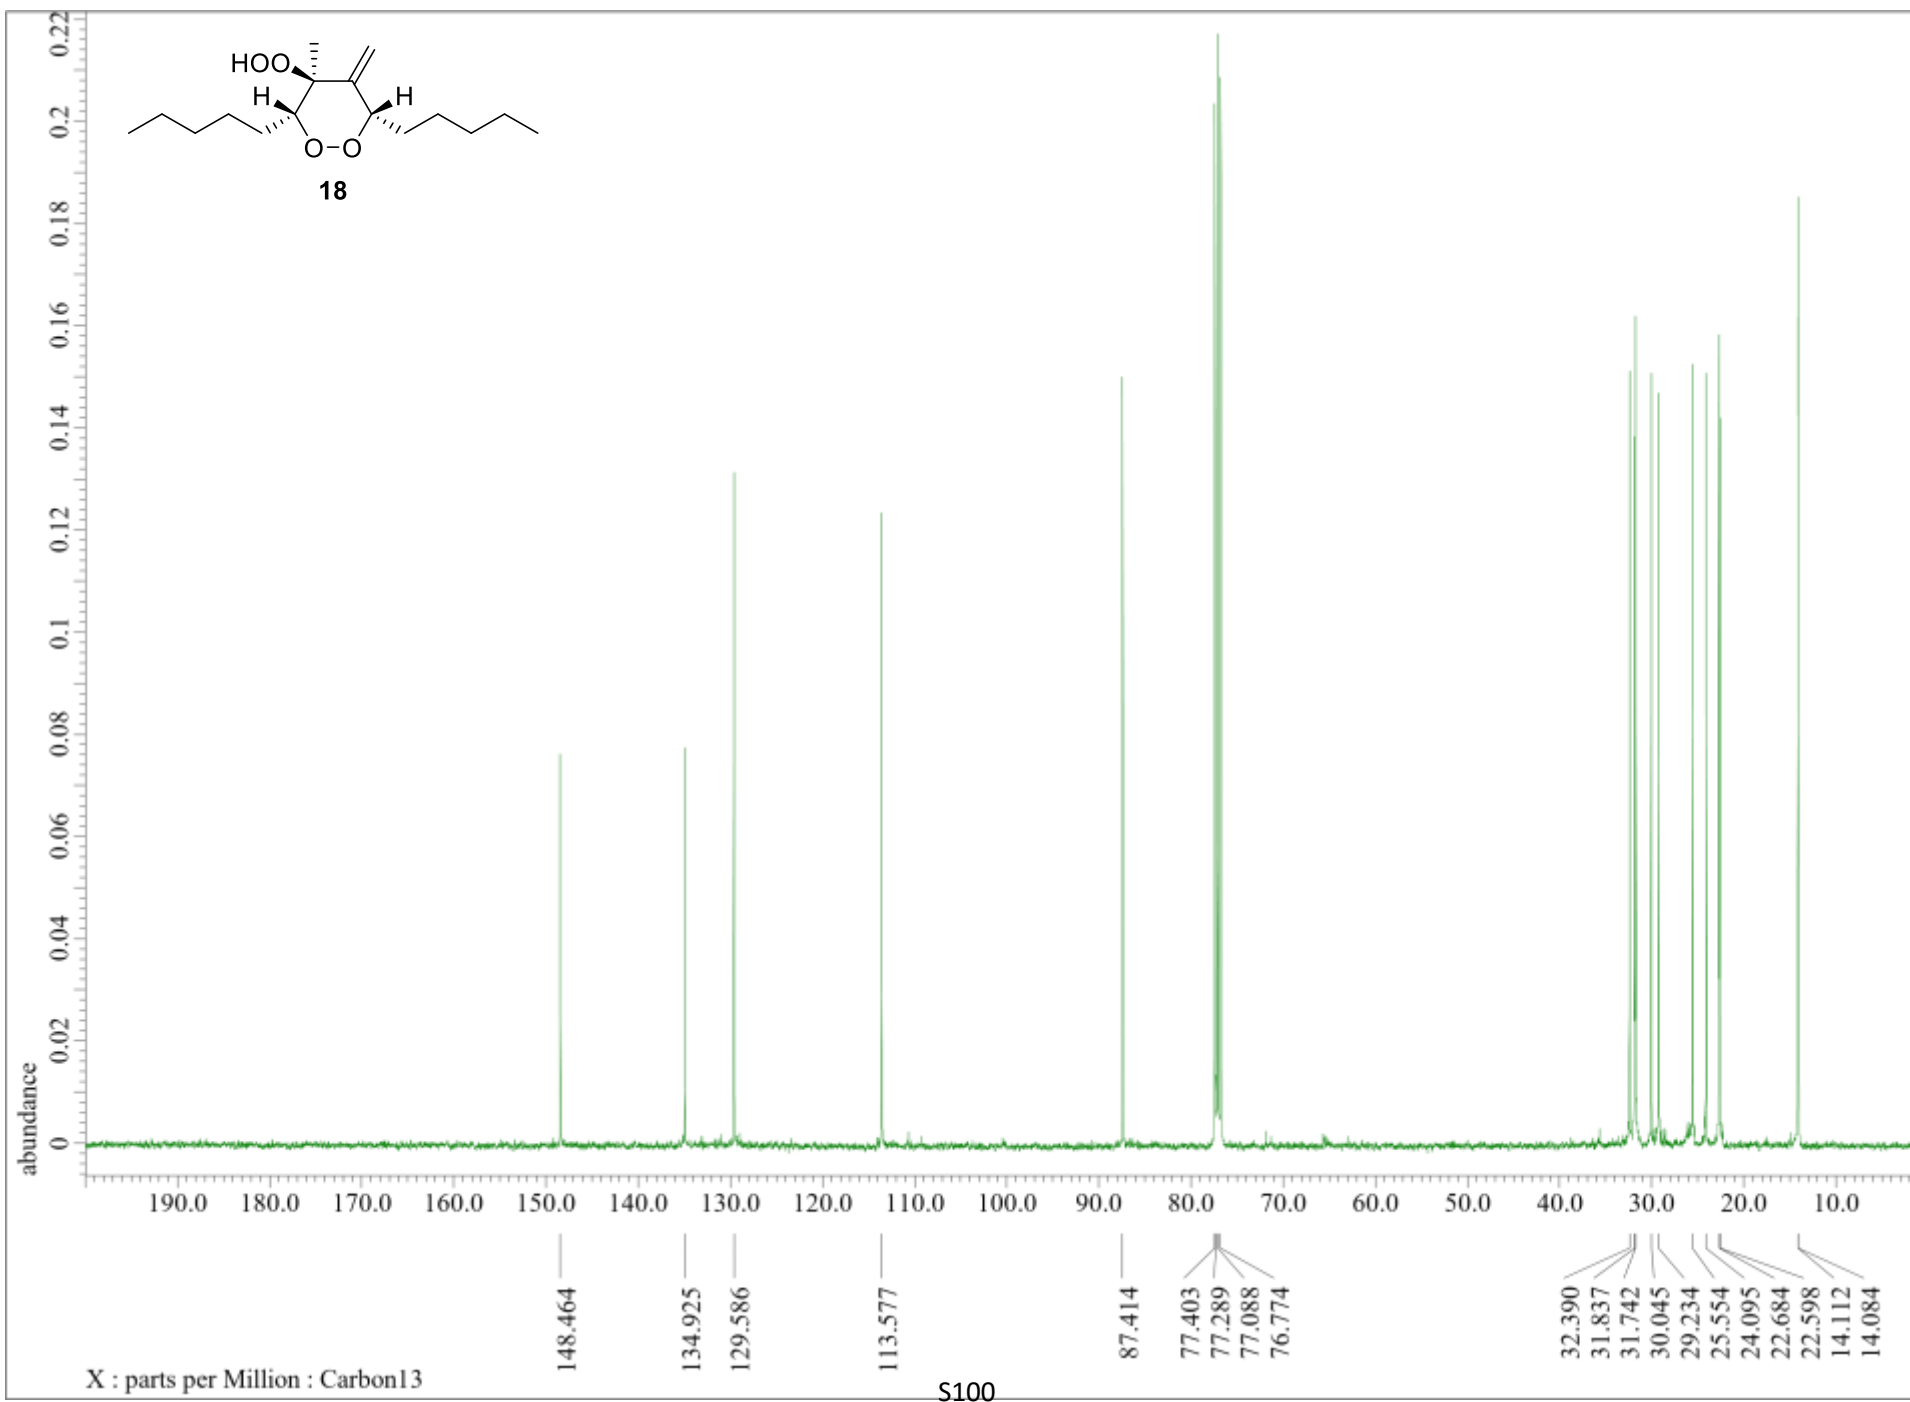

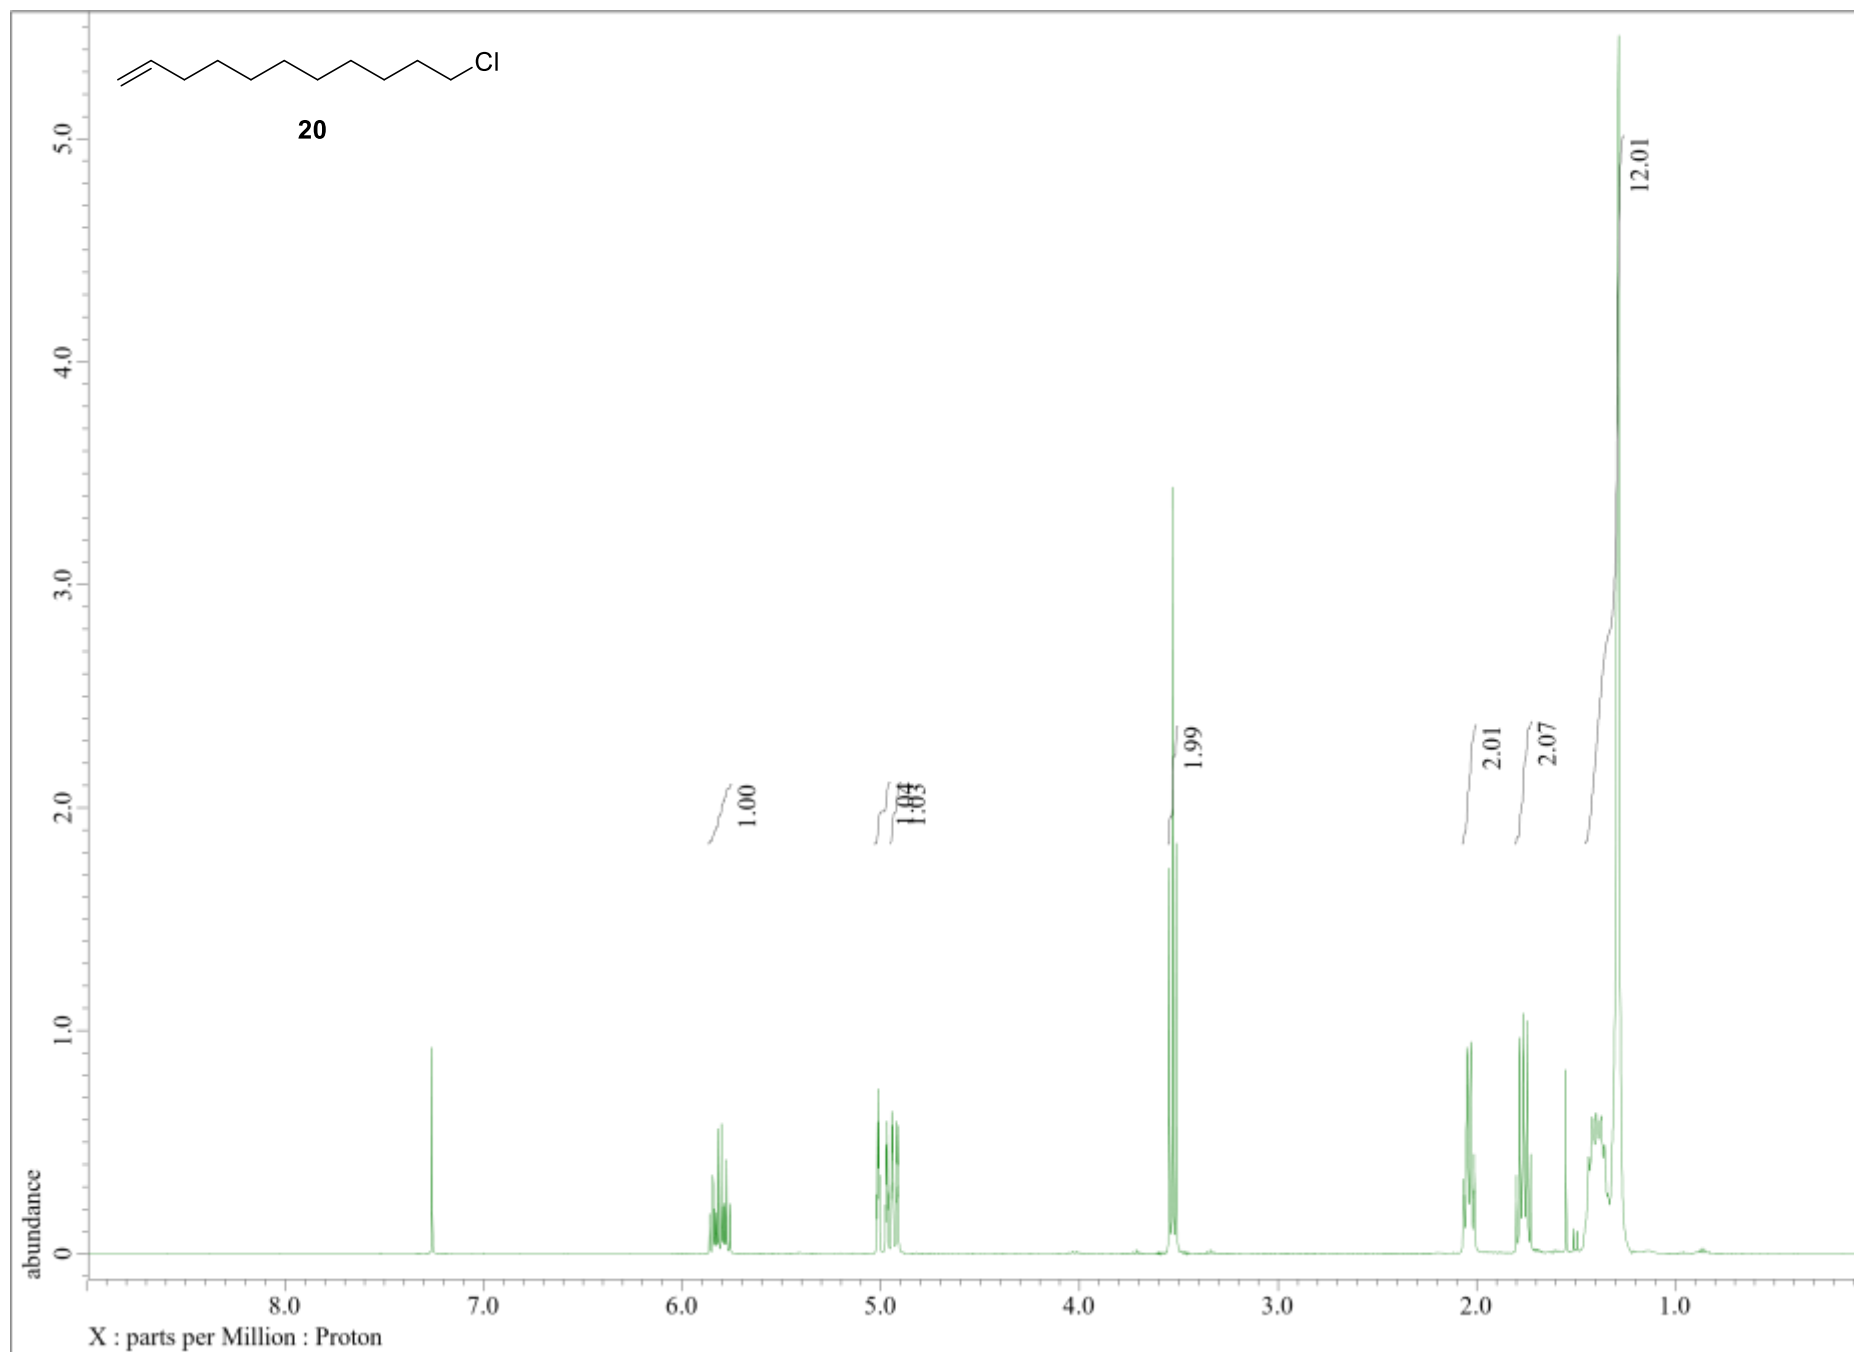

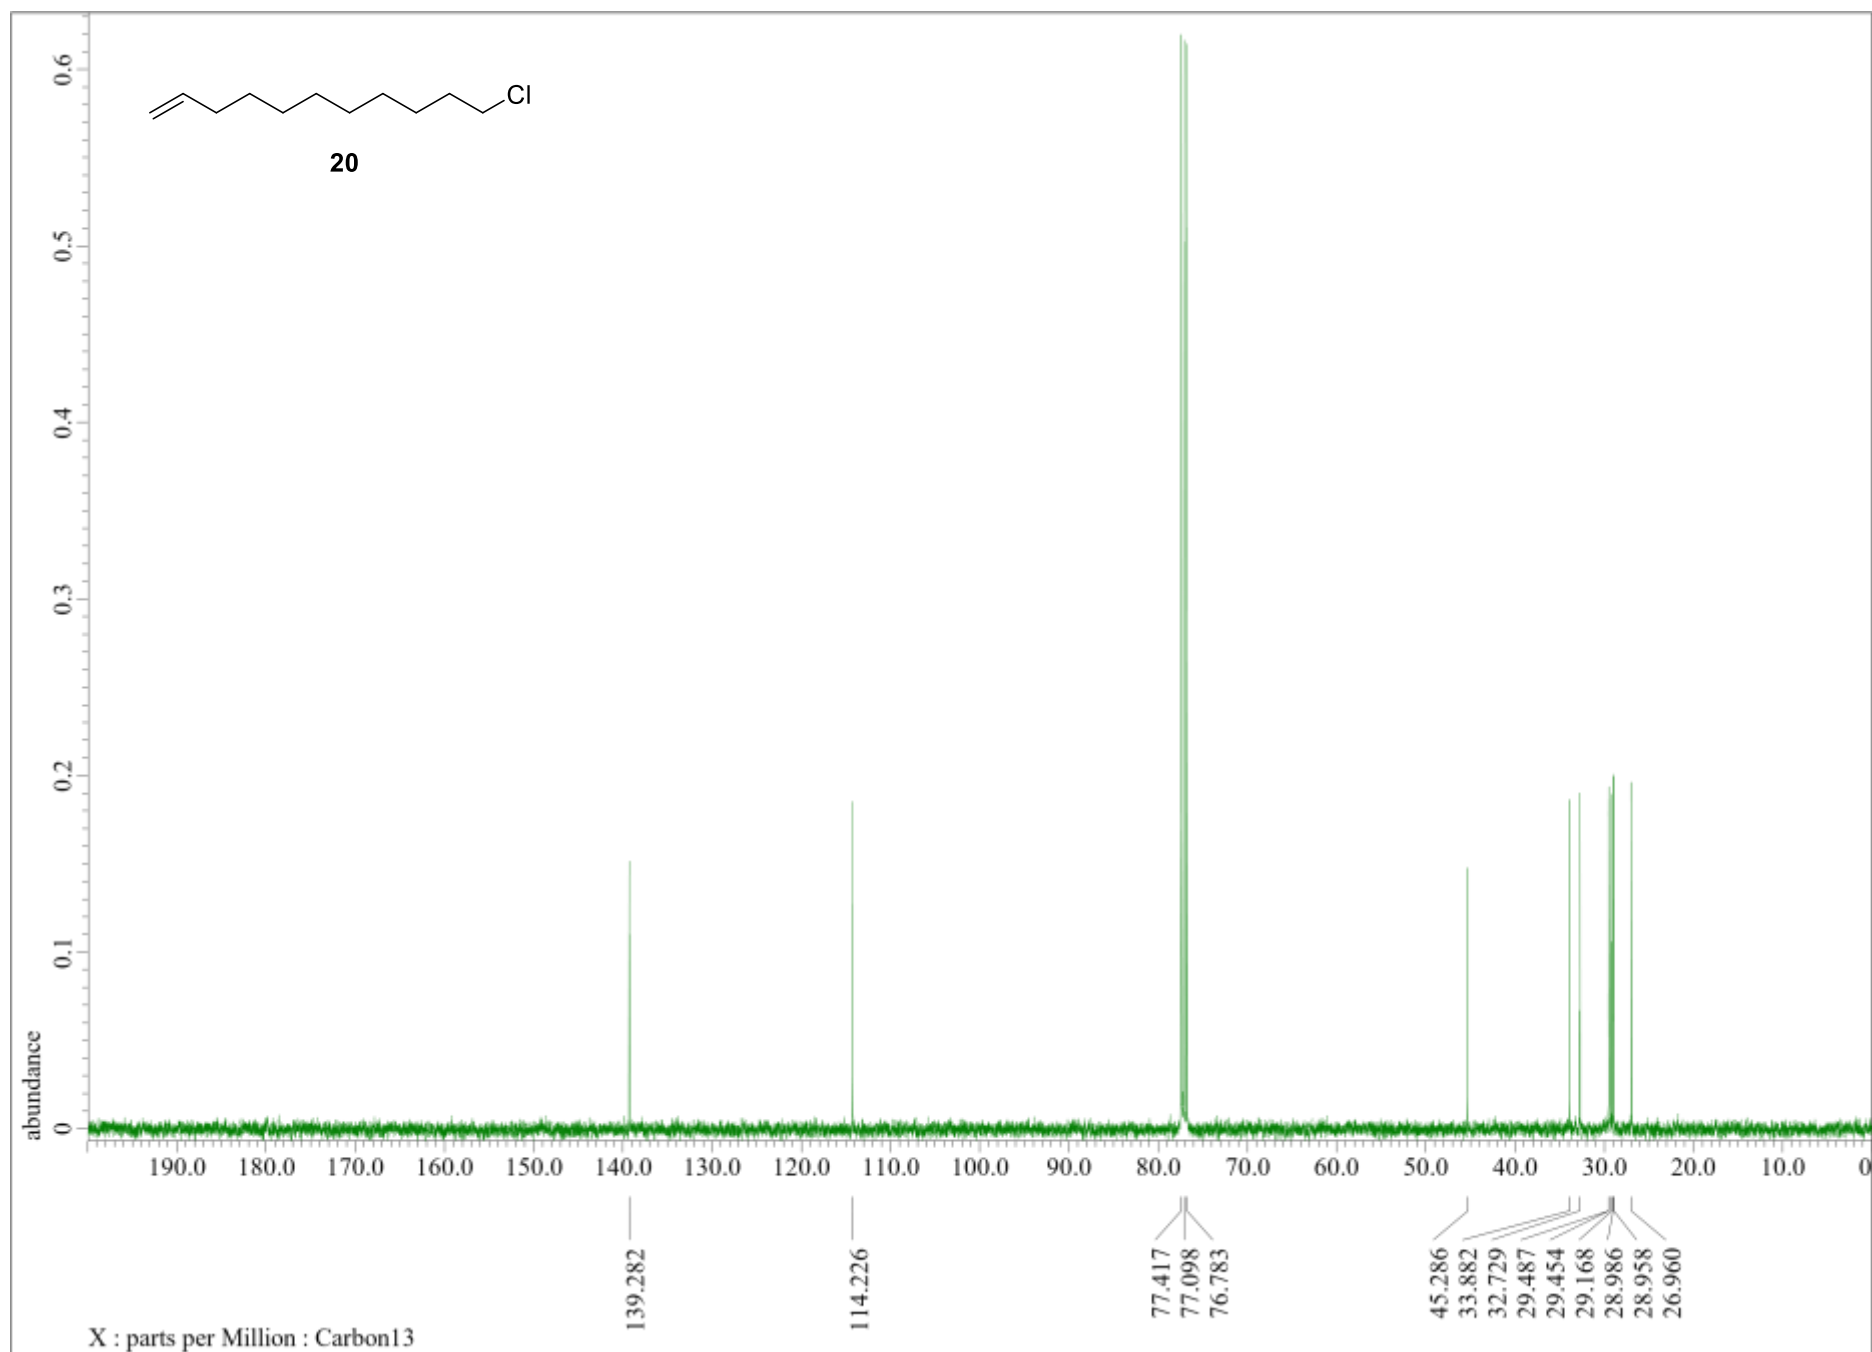

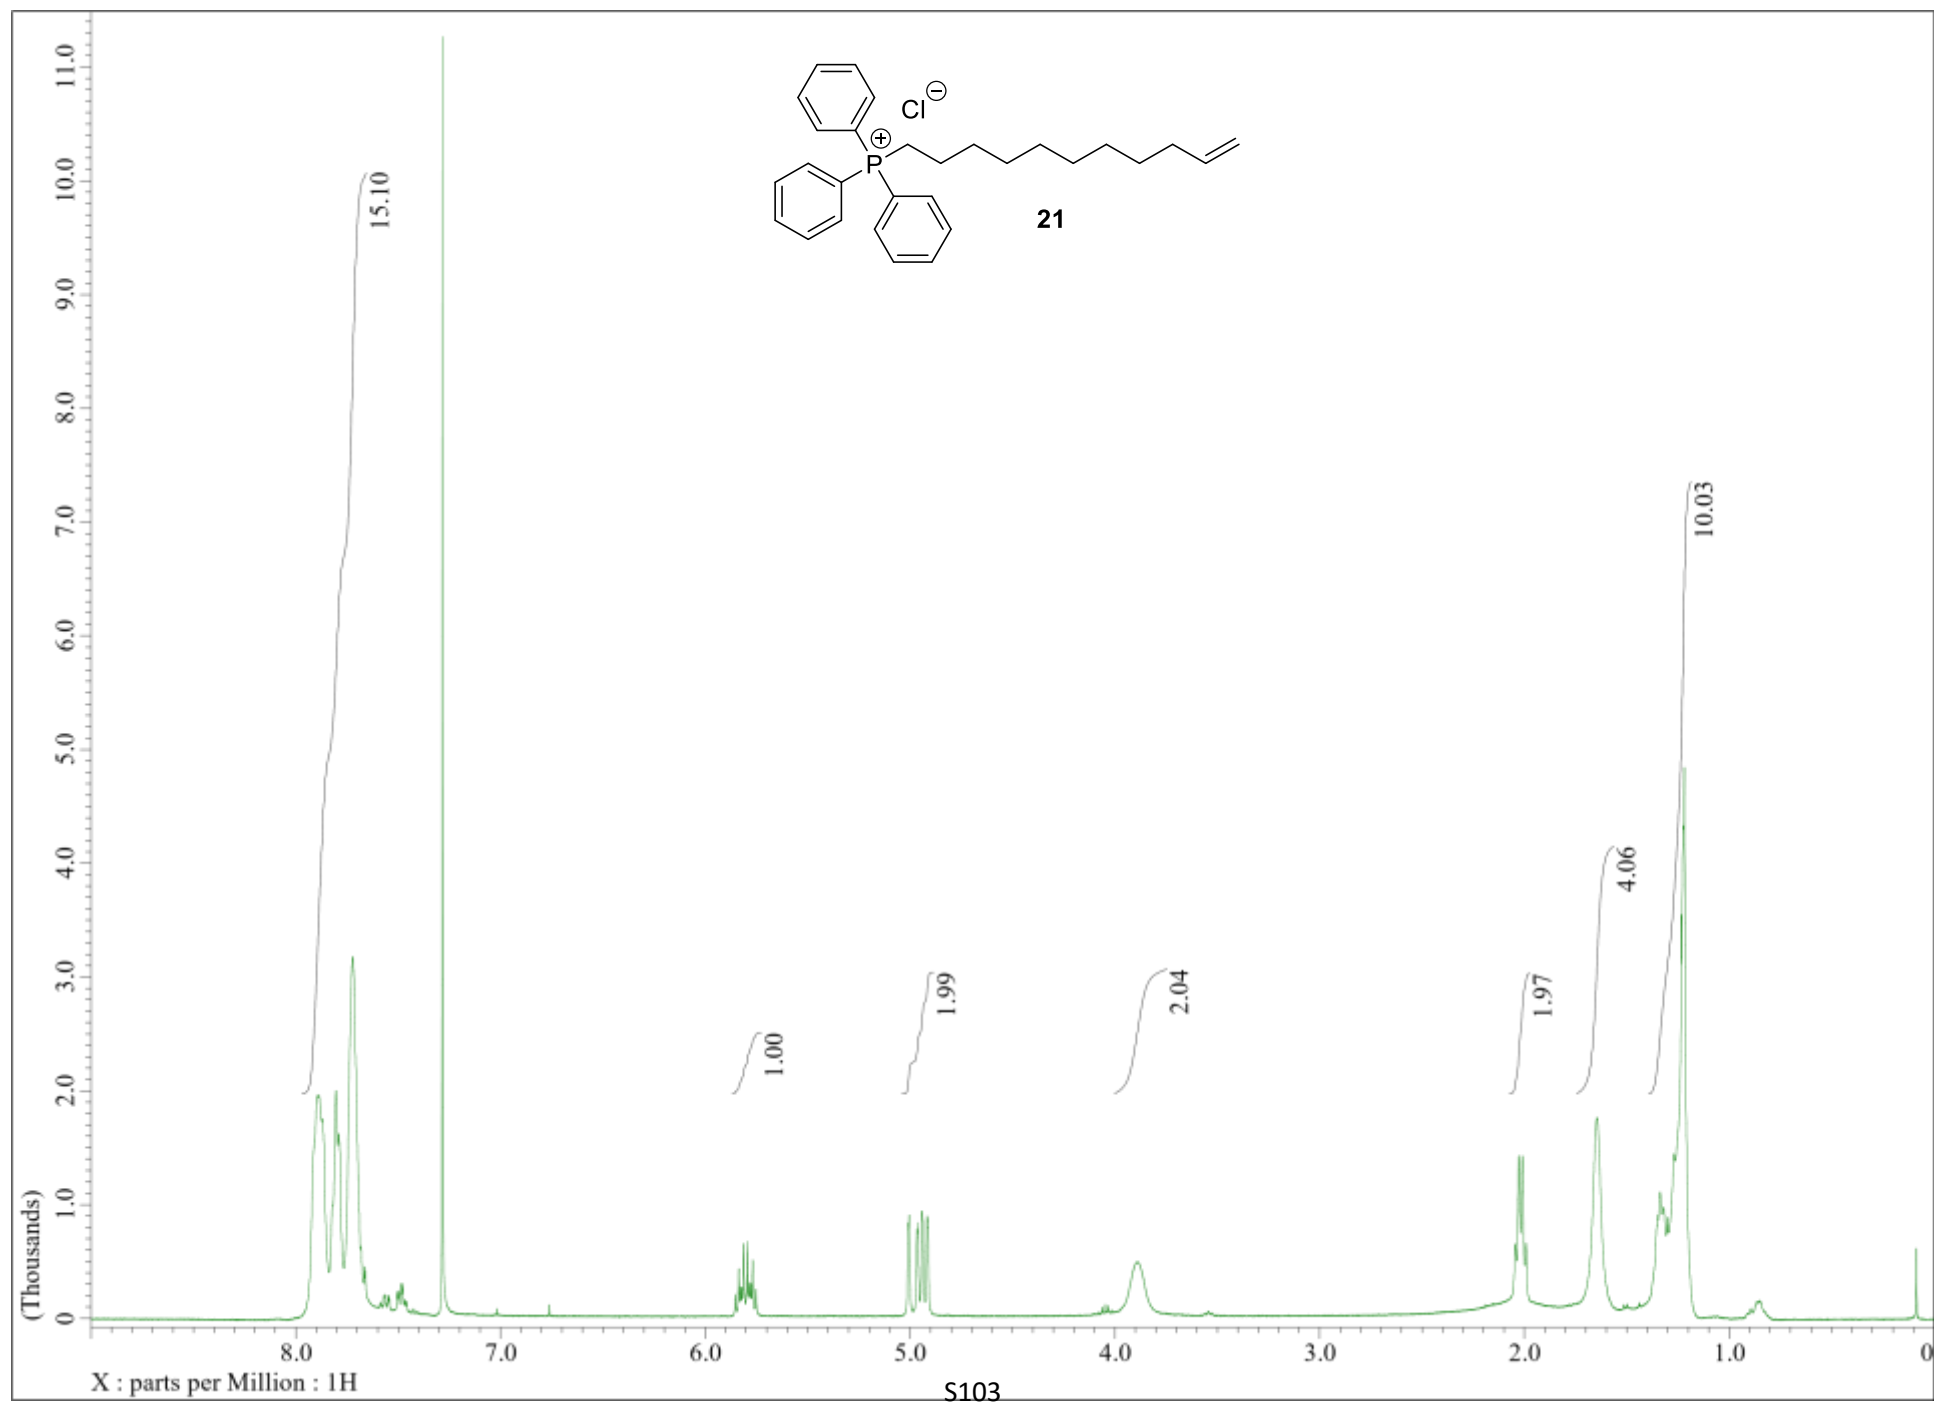

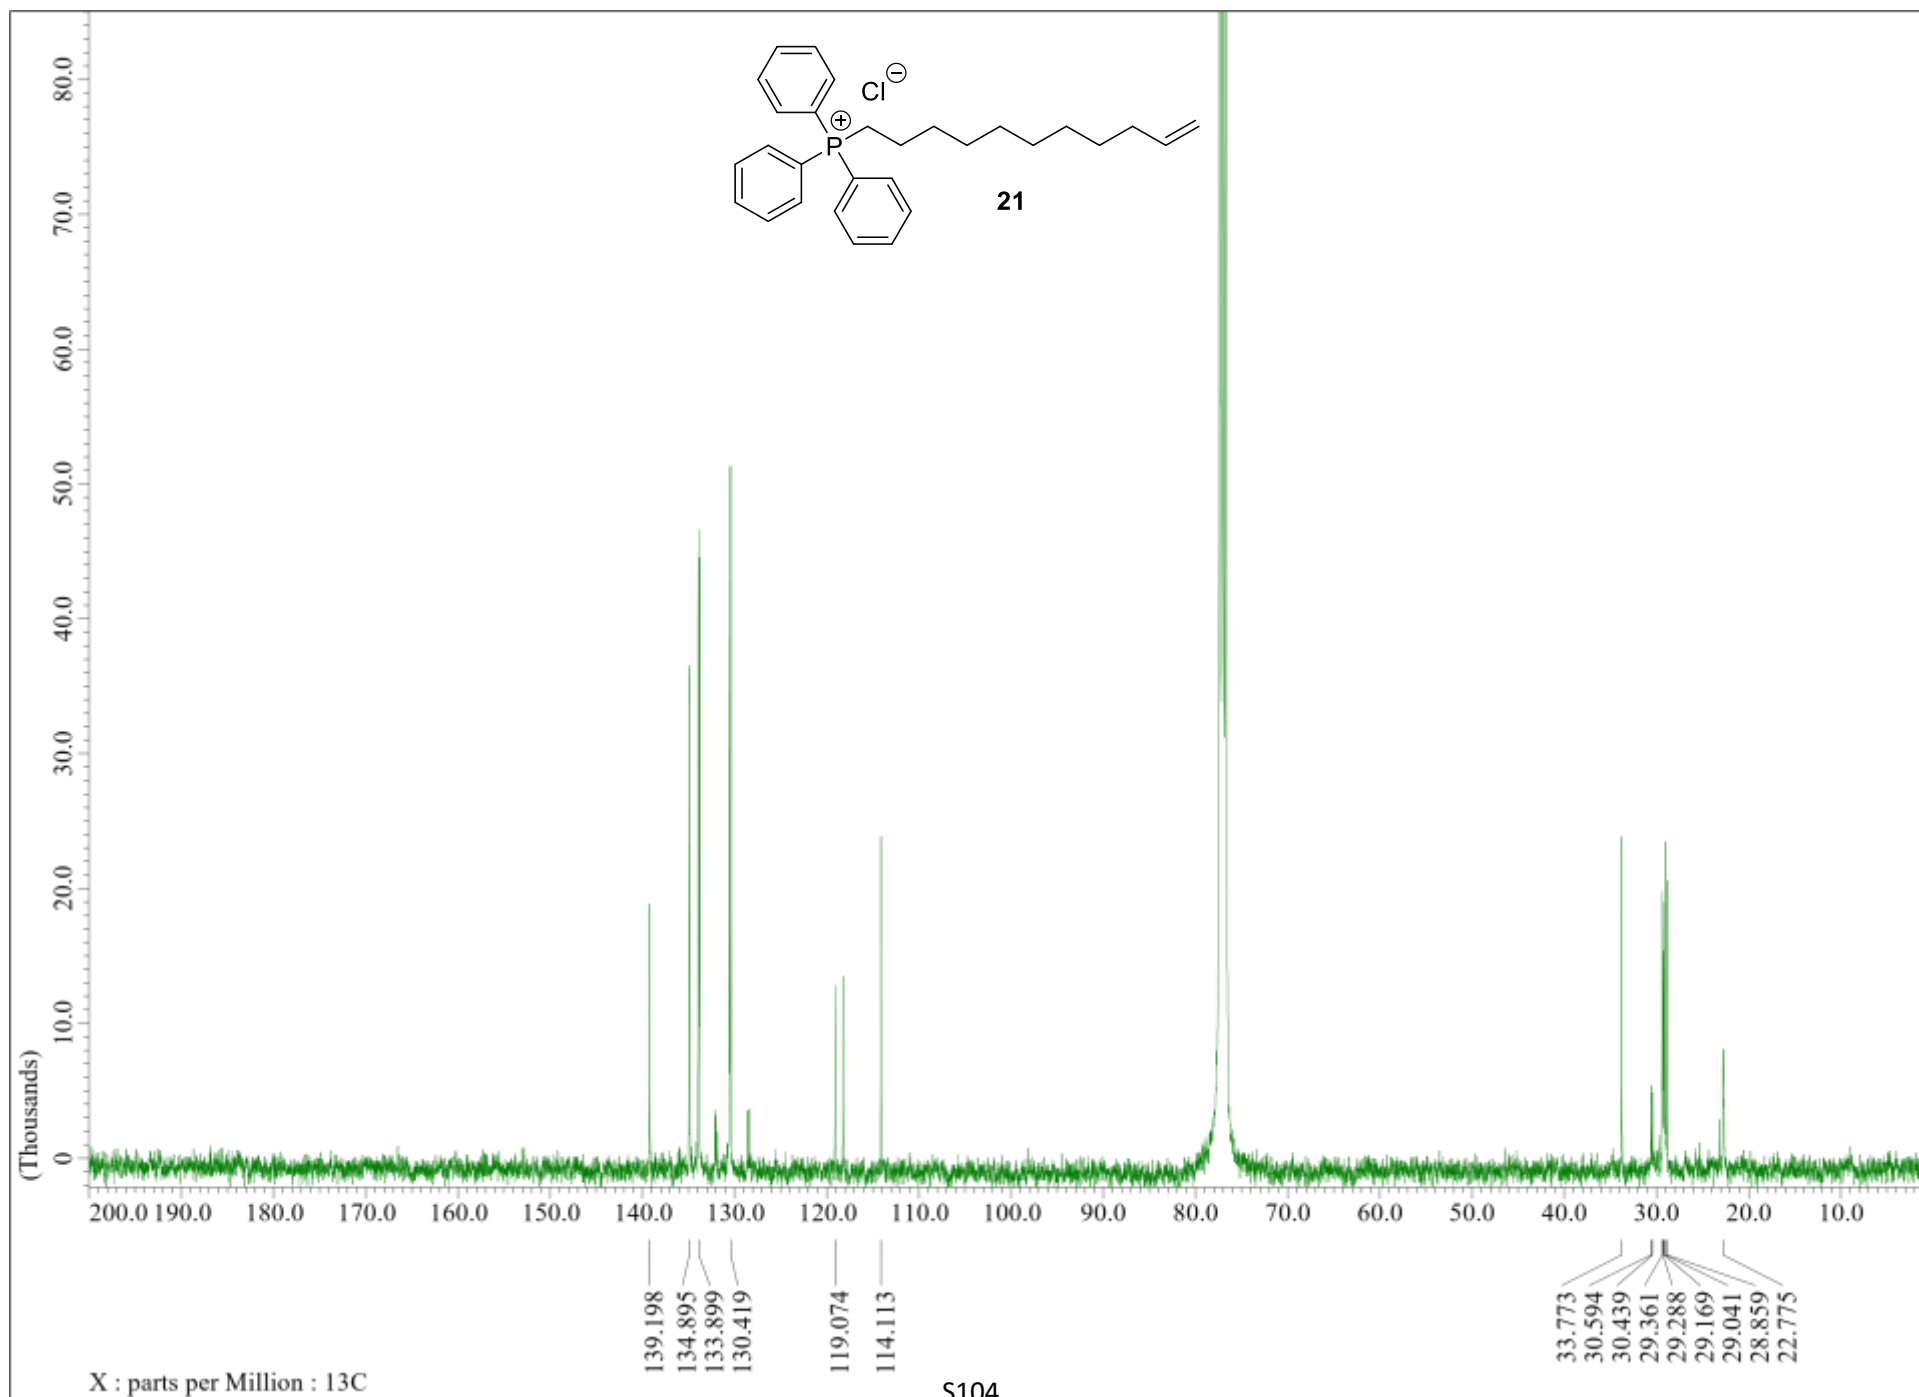



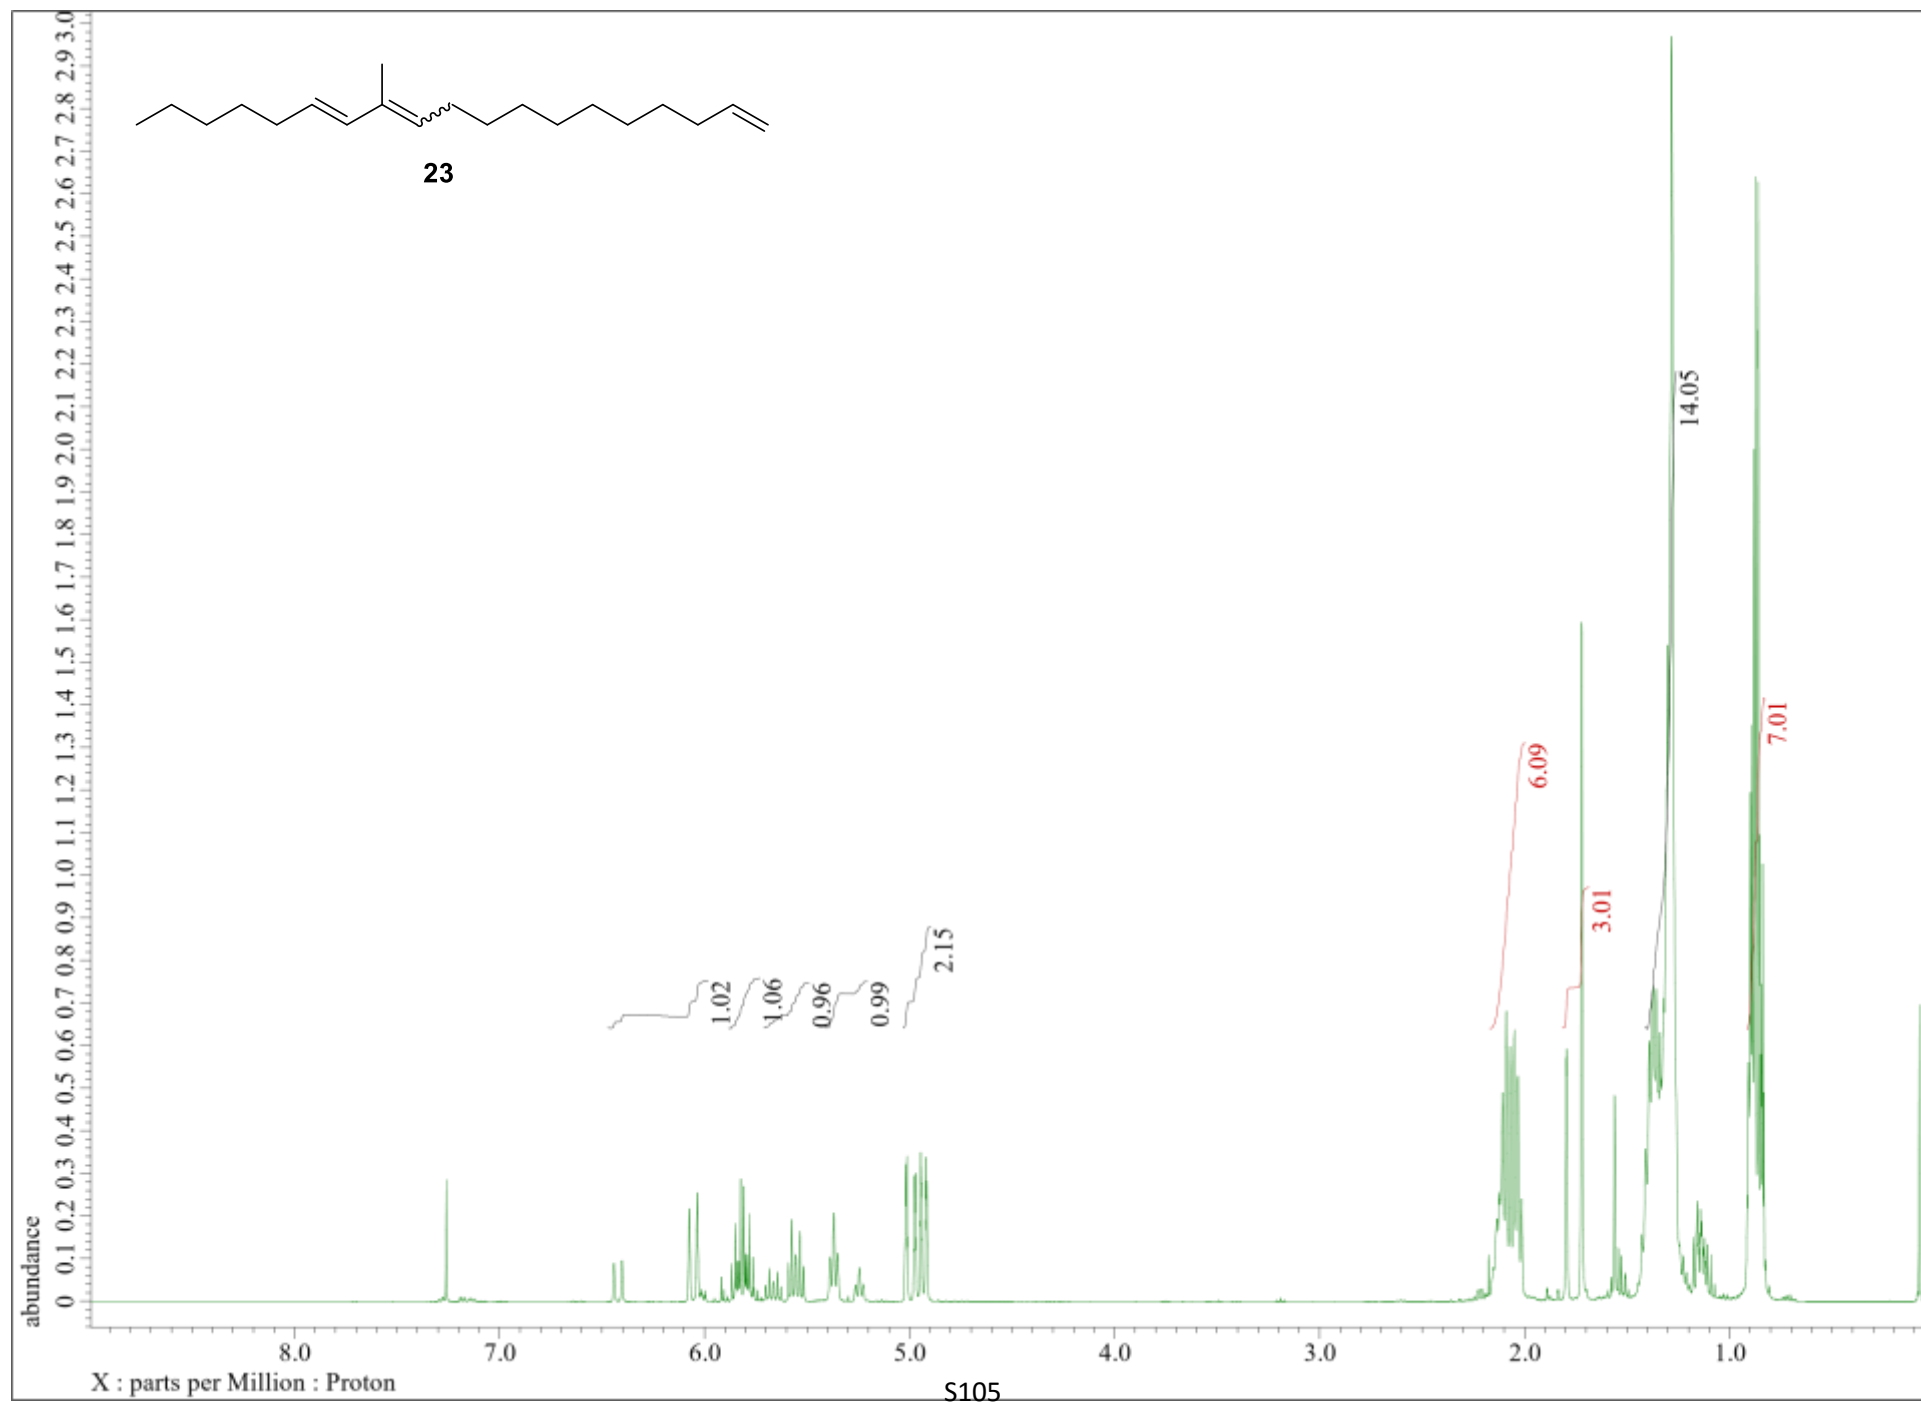

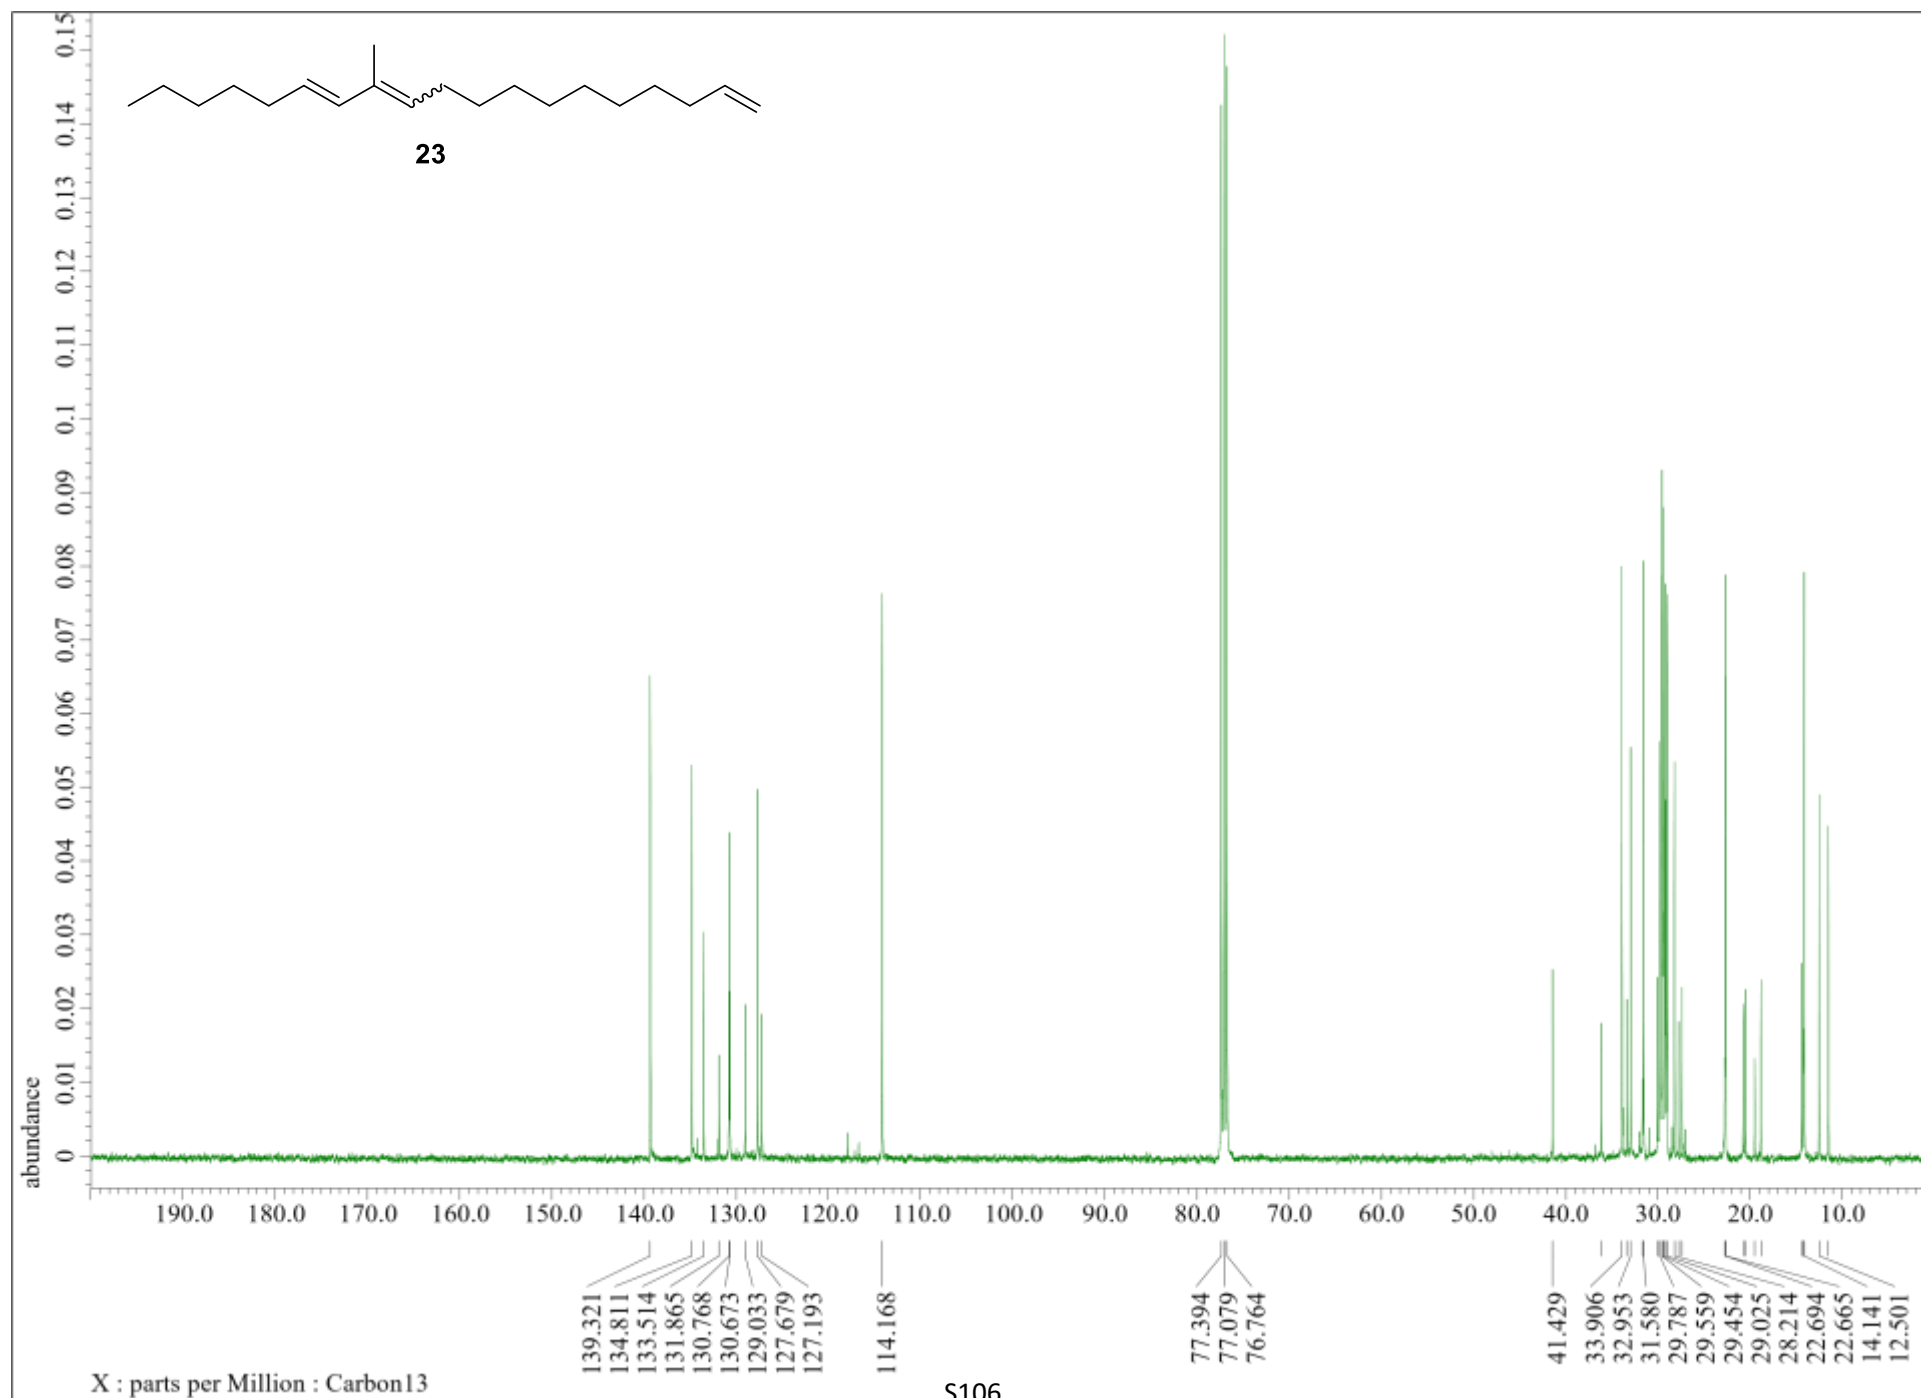

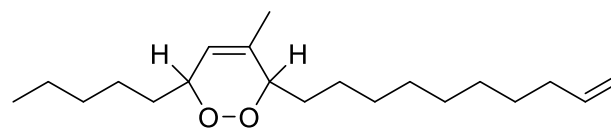

**14m**

\*Artifact from endoperoxide formation  
which could not be removed

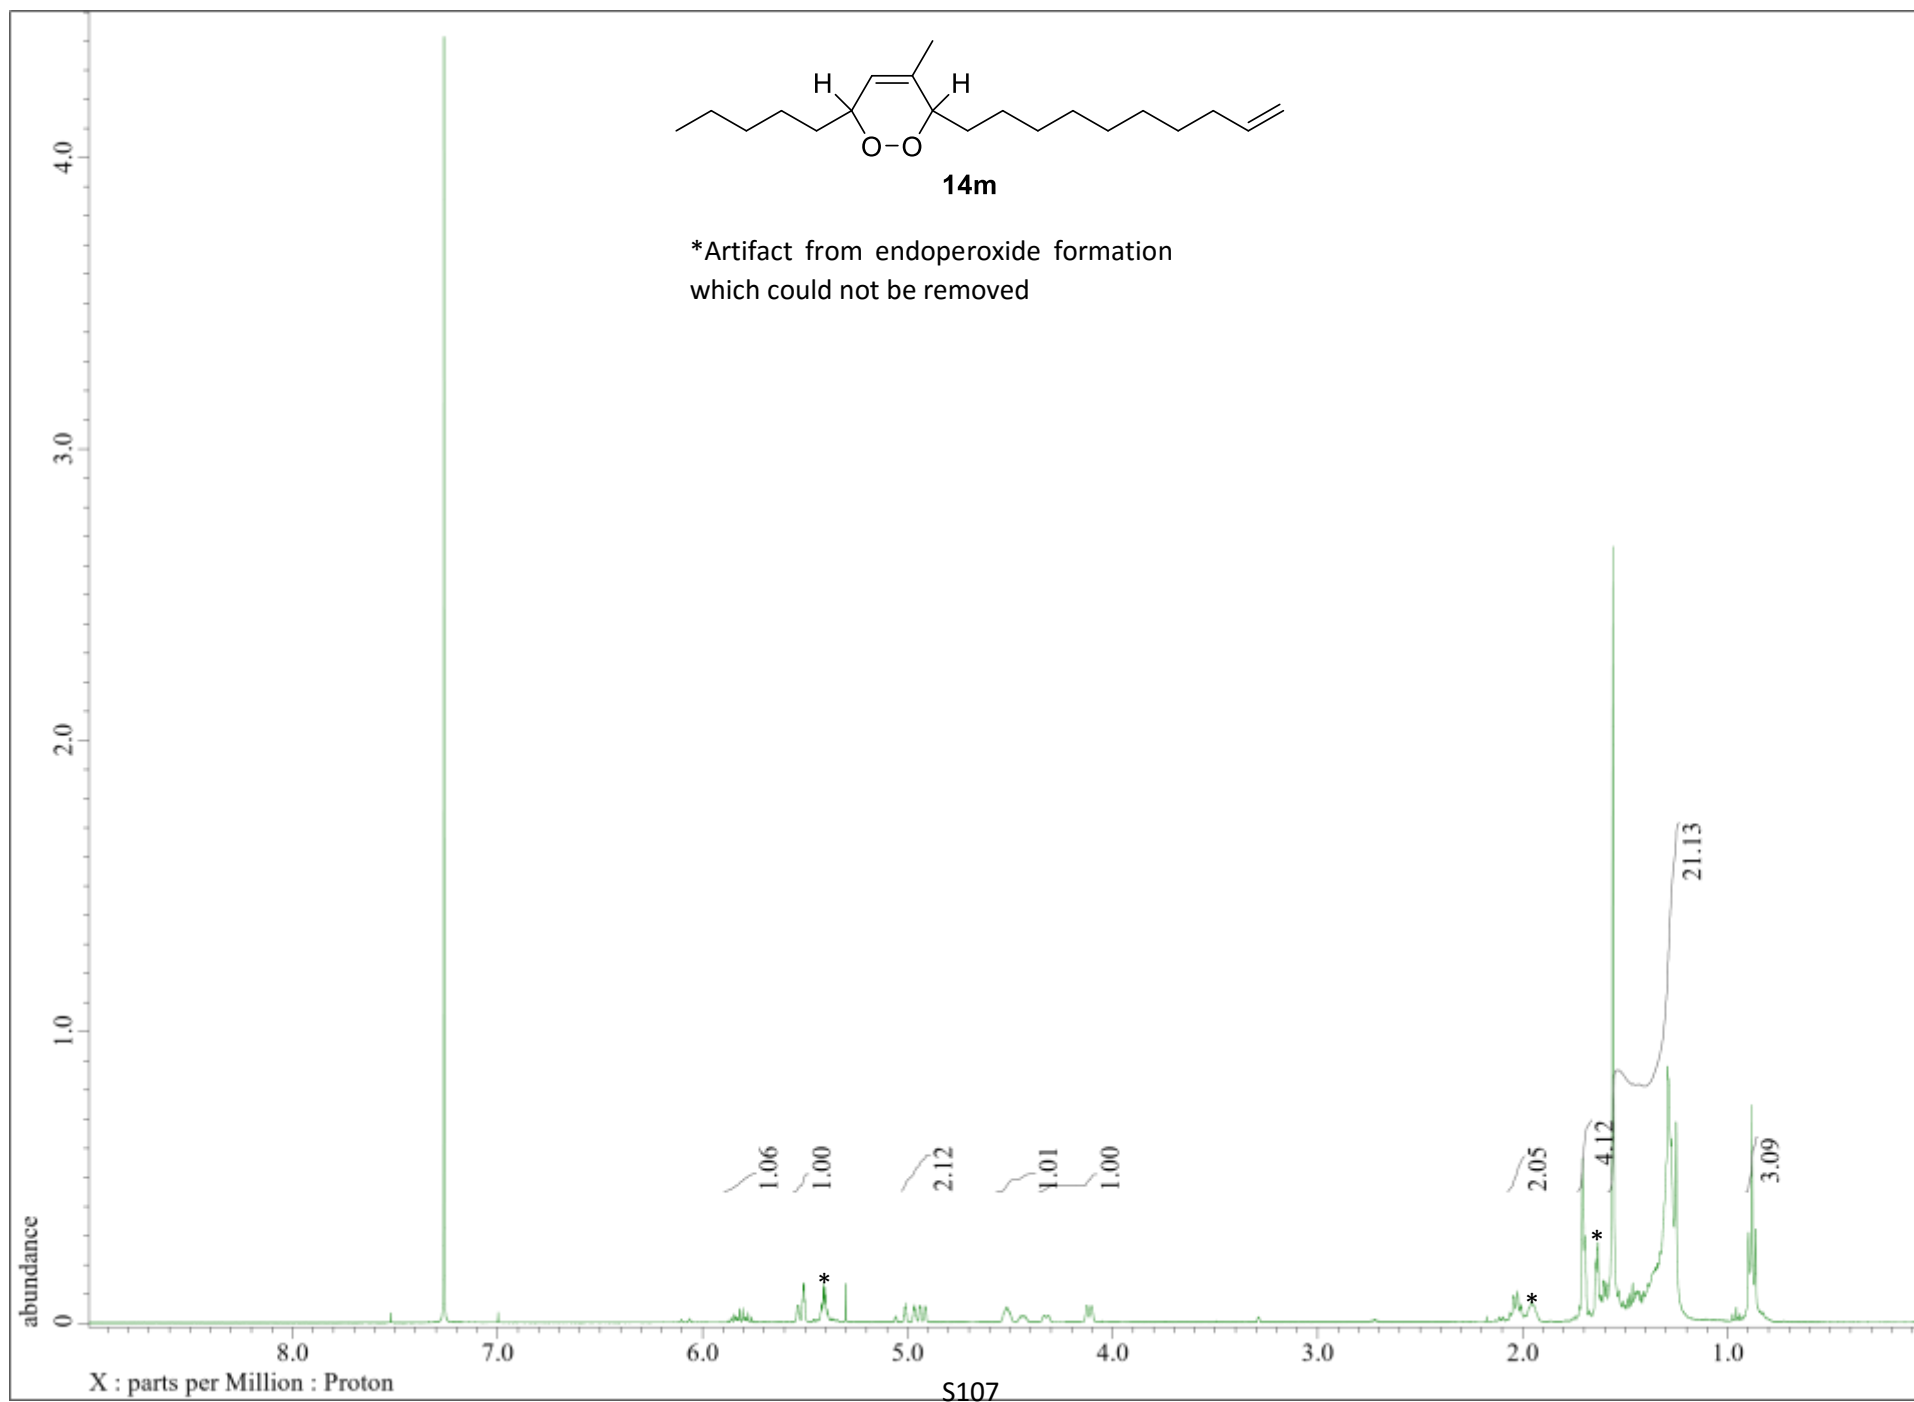

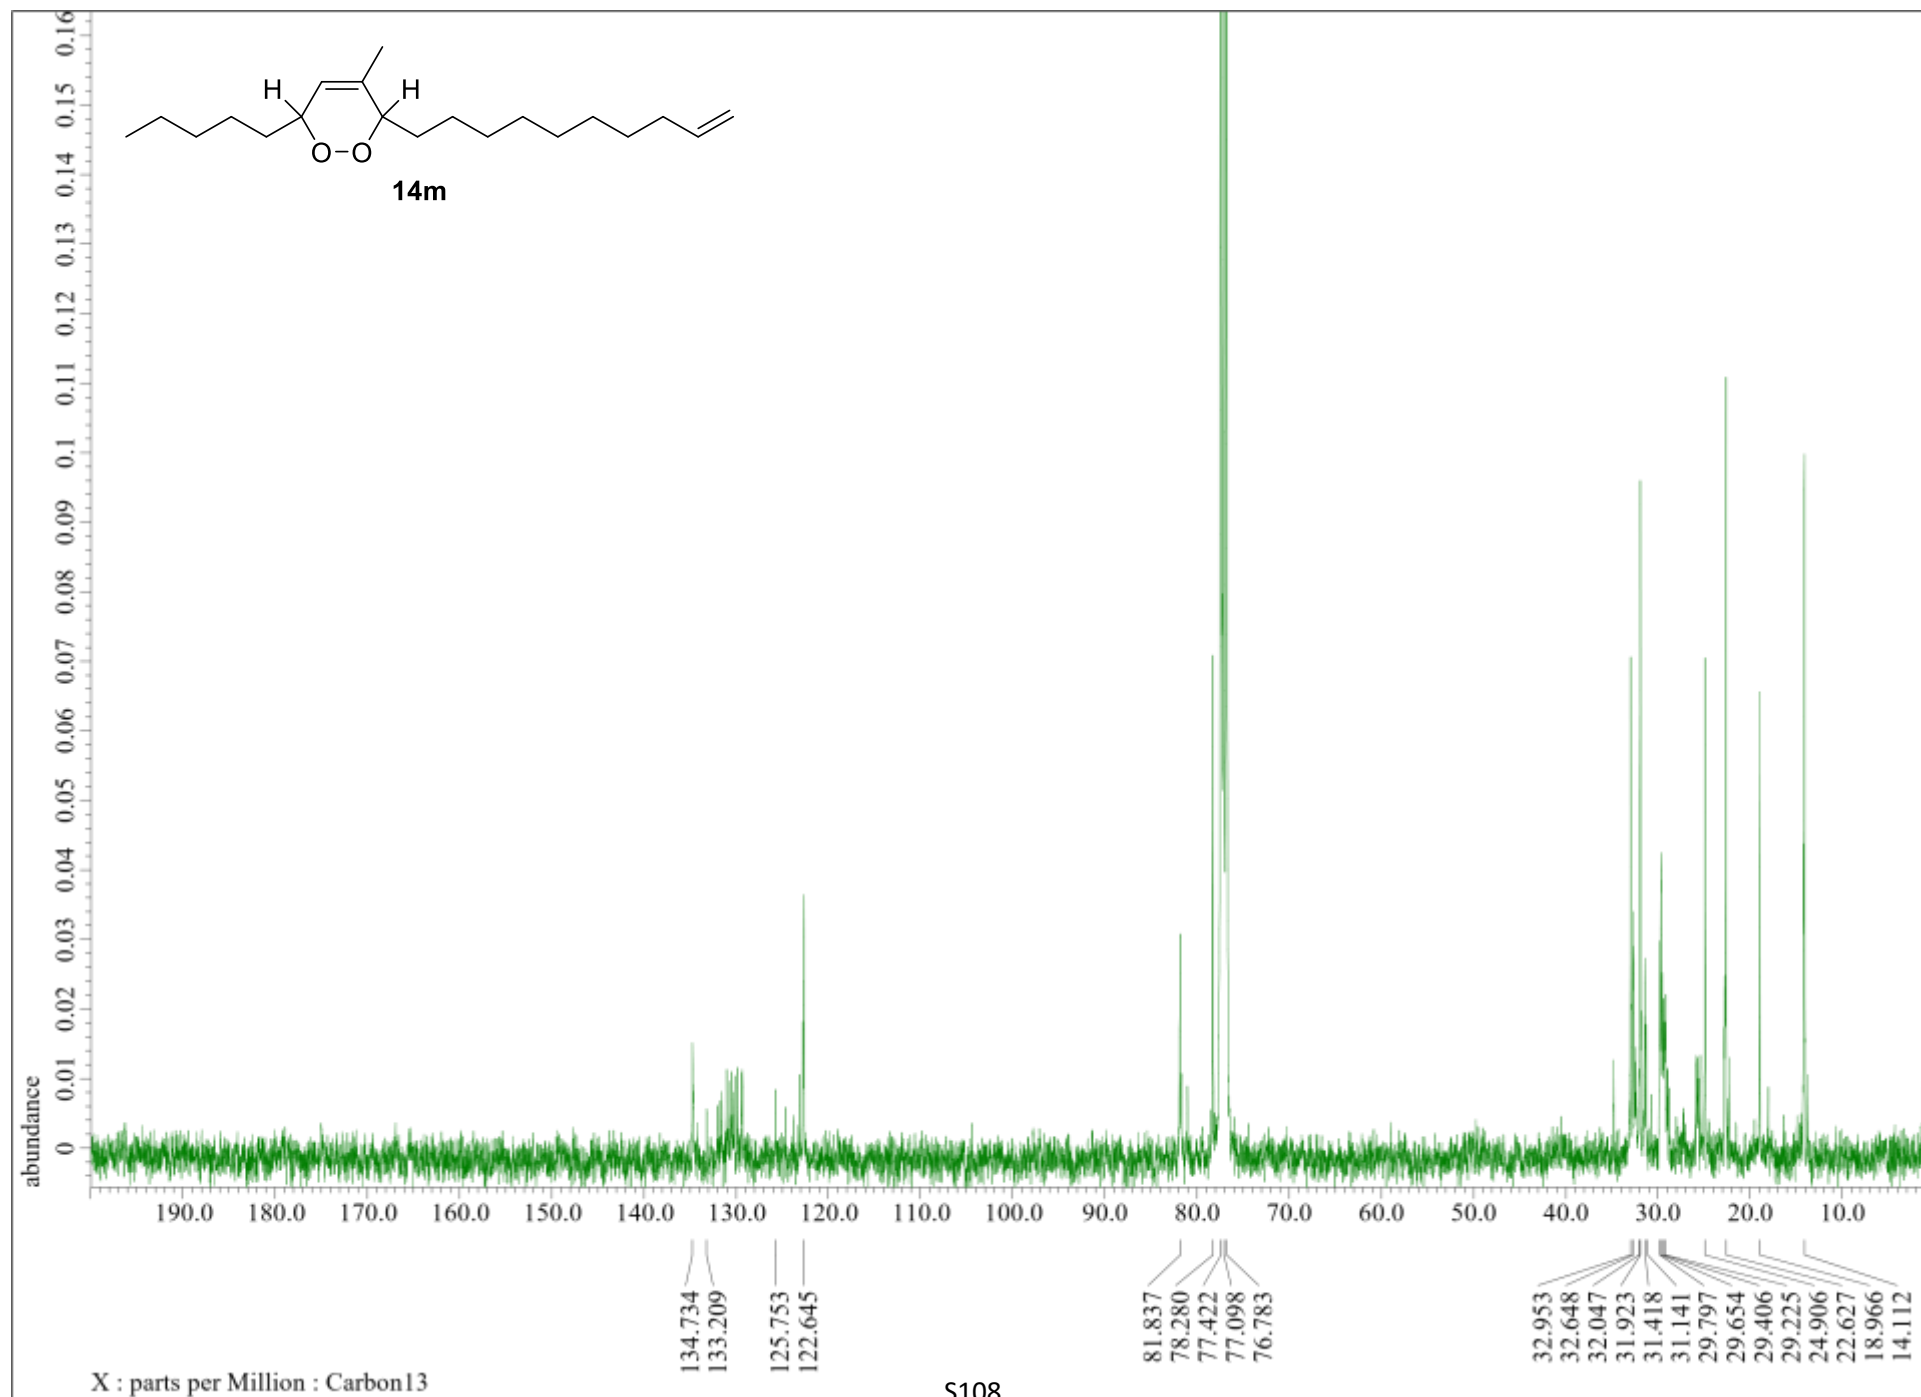

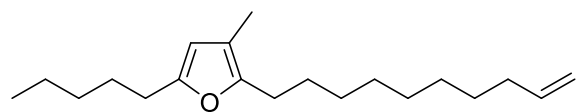

15m

\*Artifact from endoperoxide formation  
which could not be removed

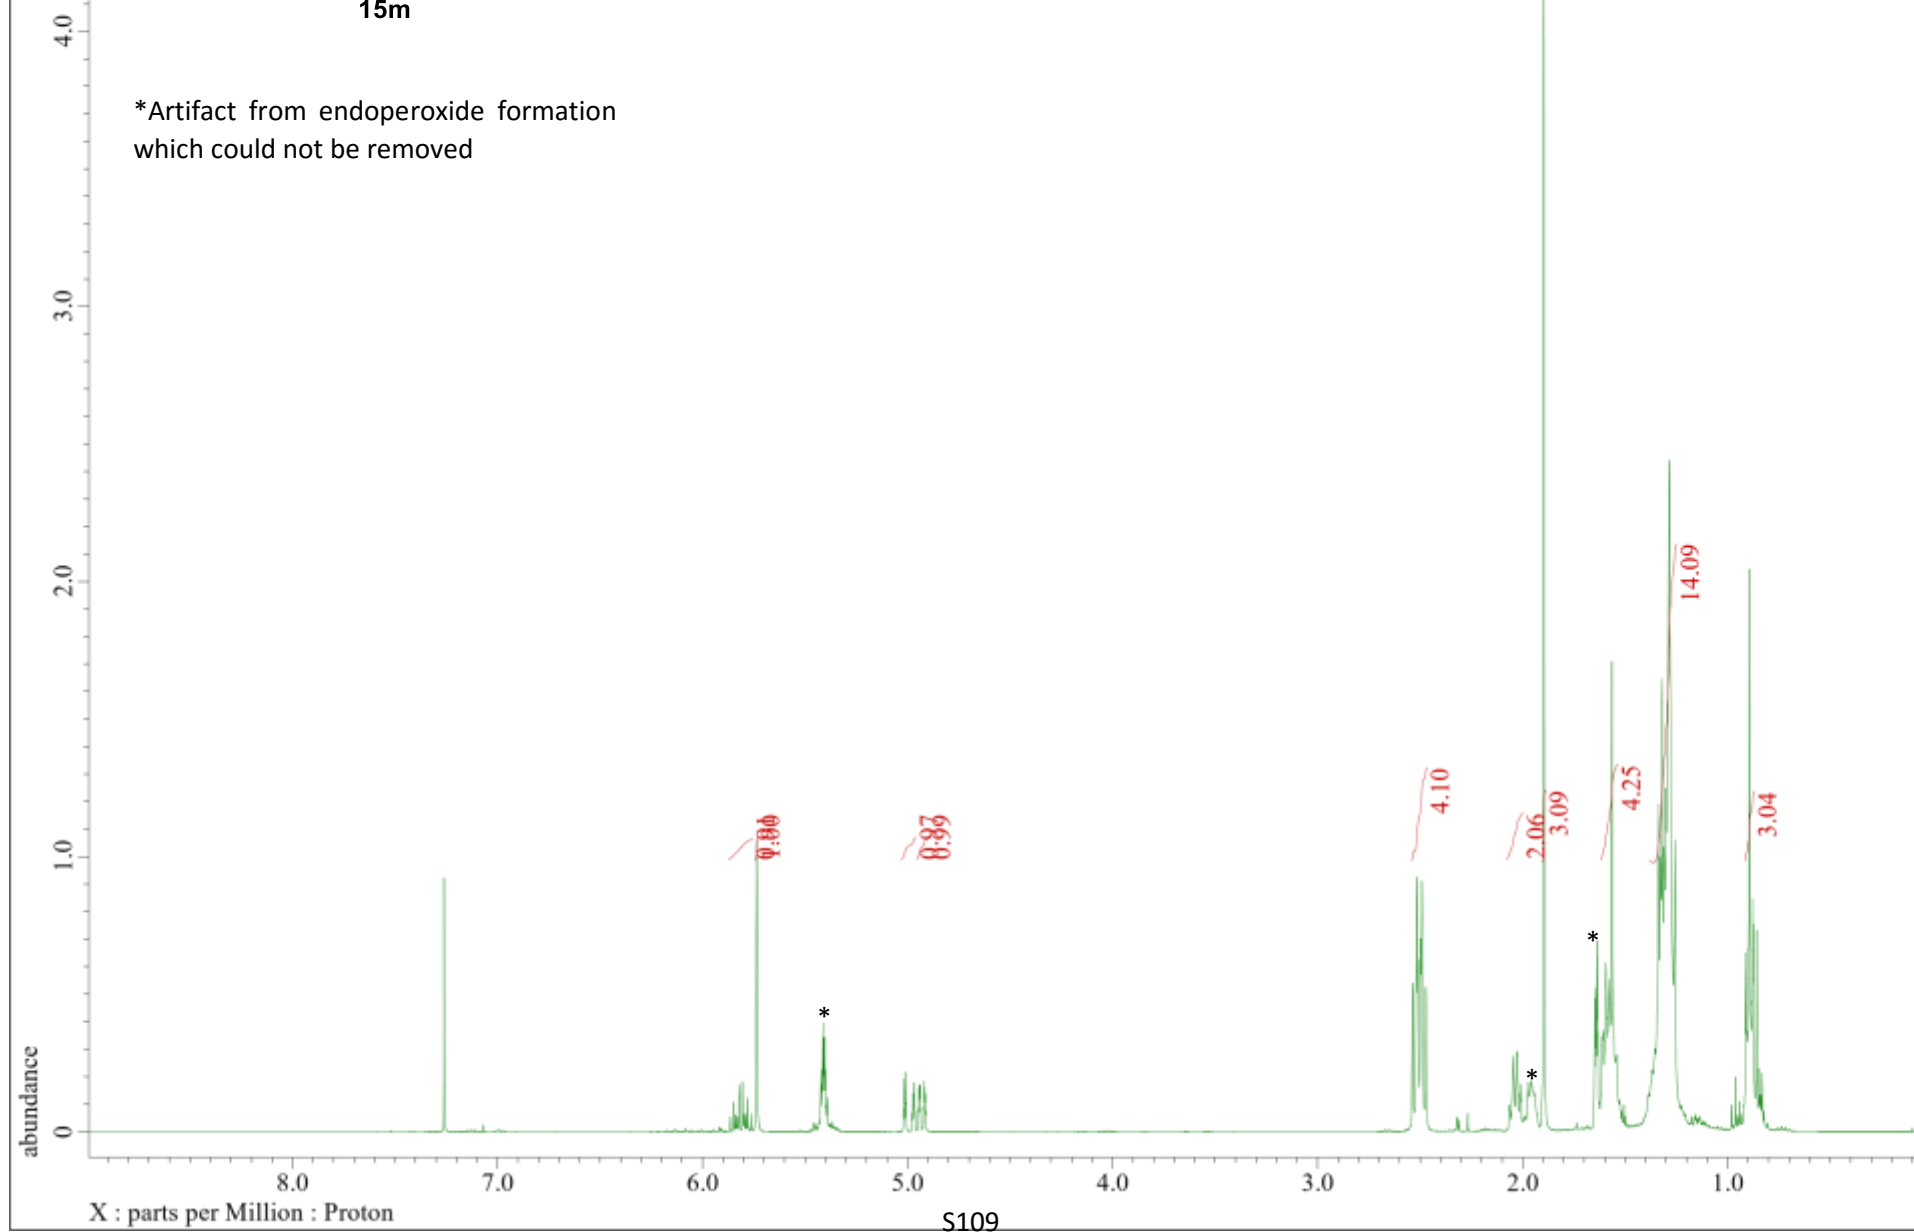

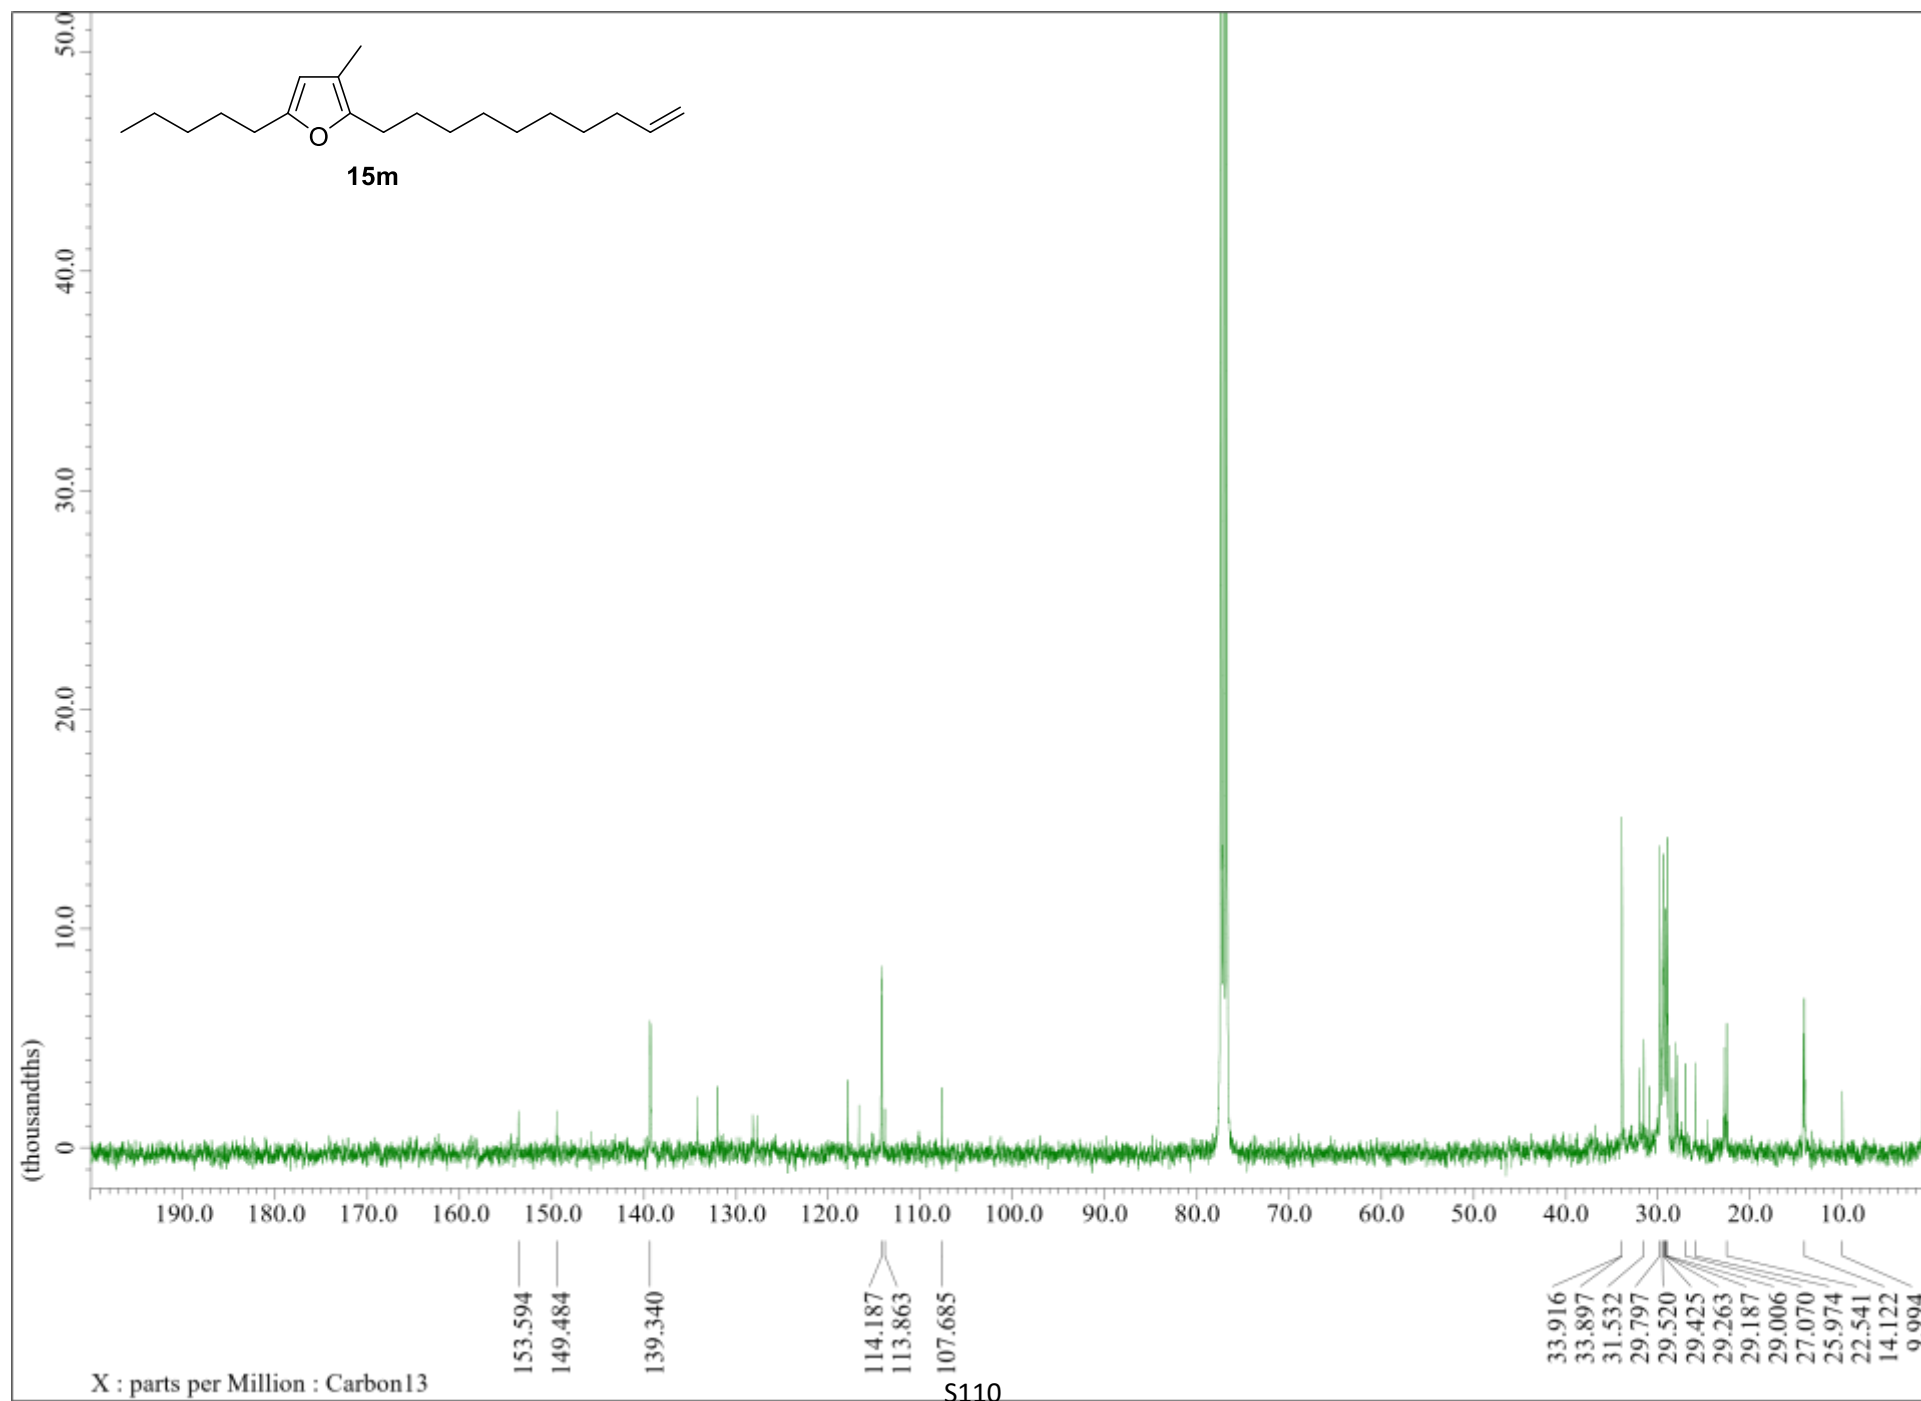

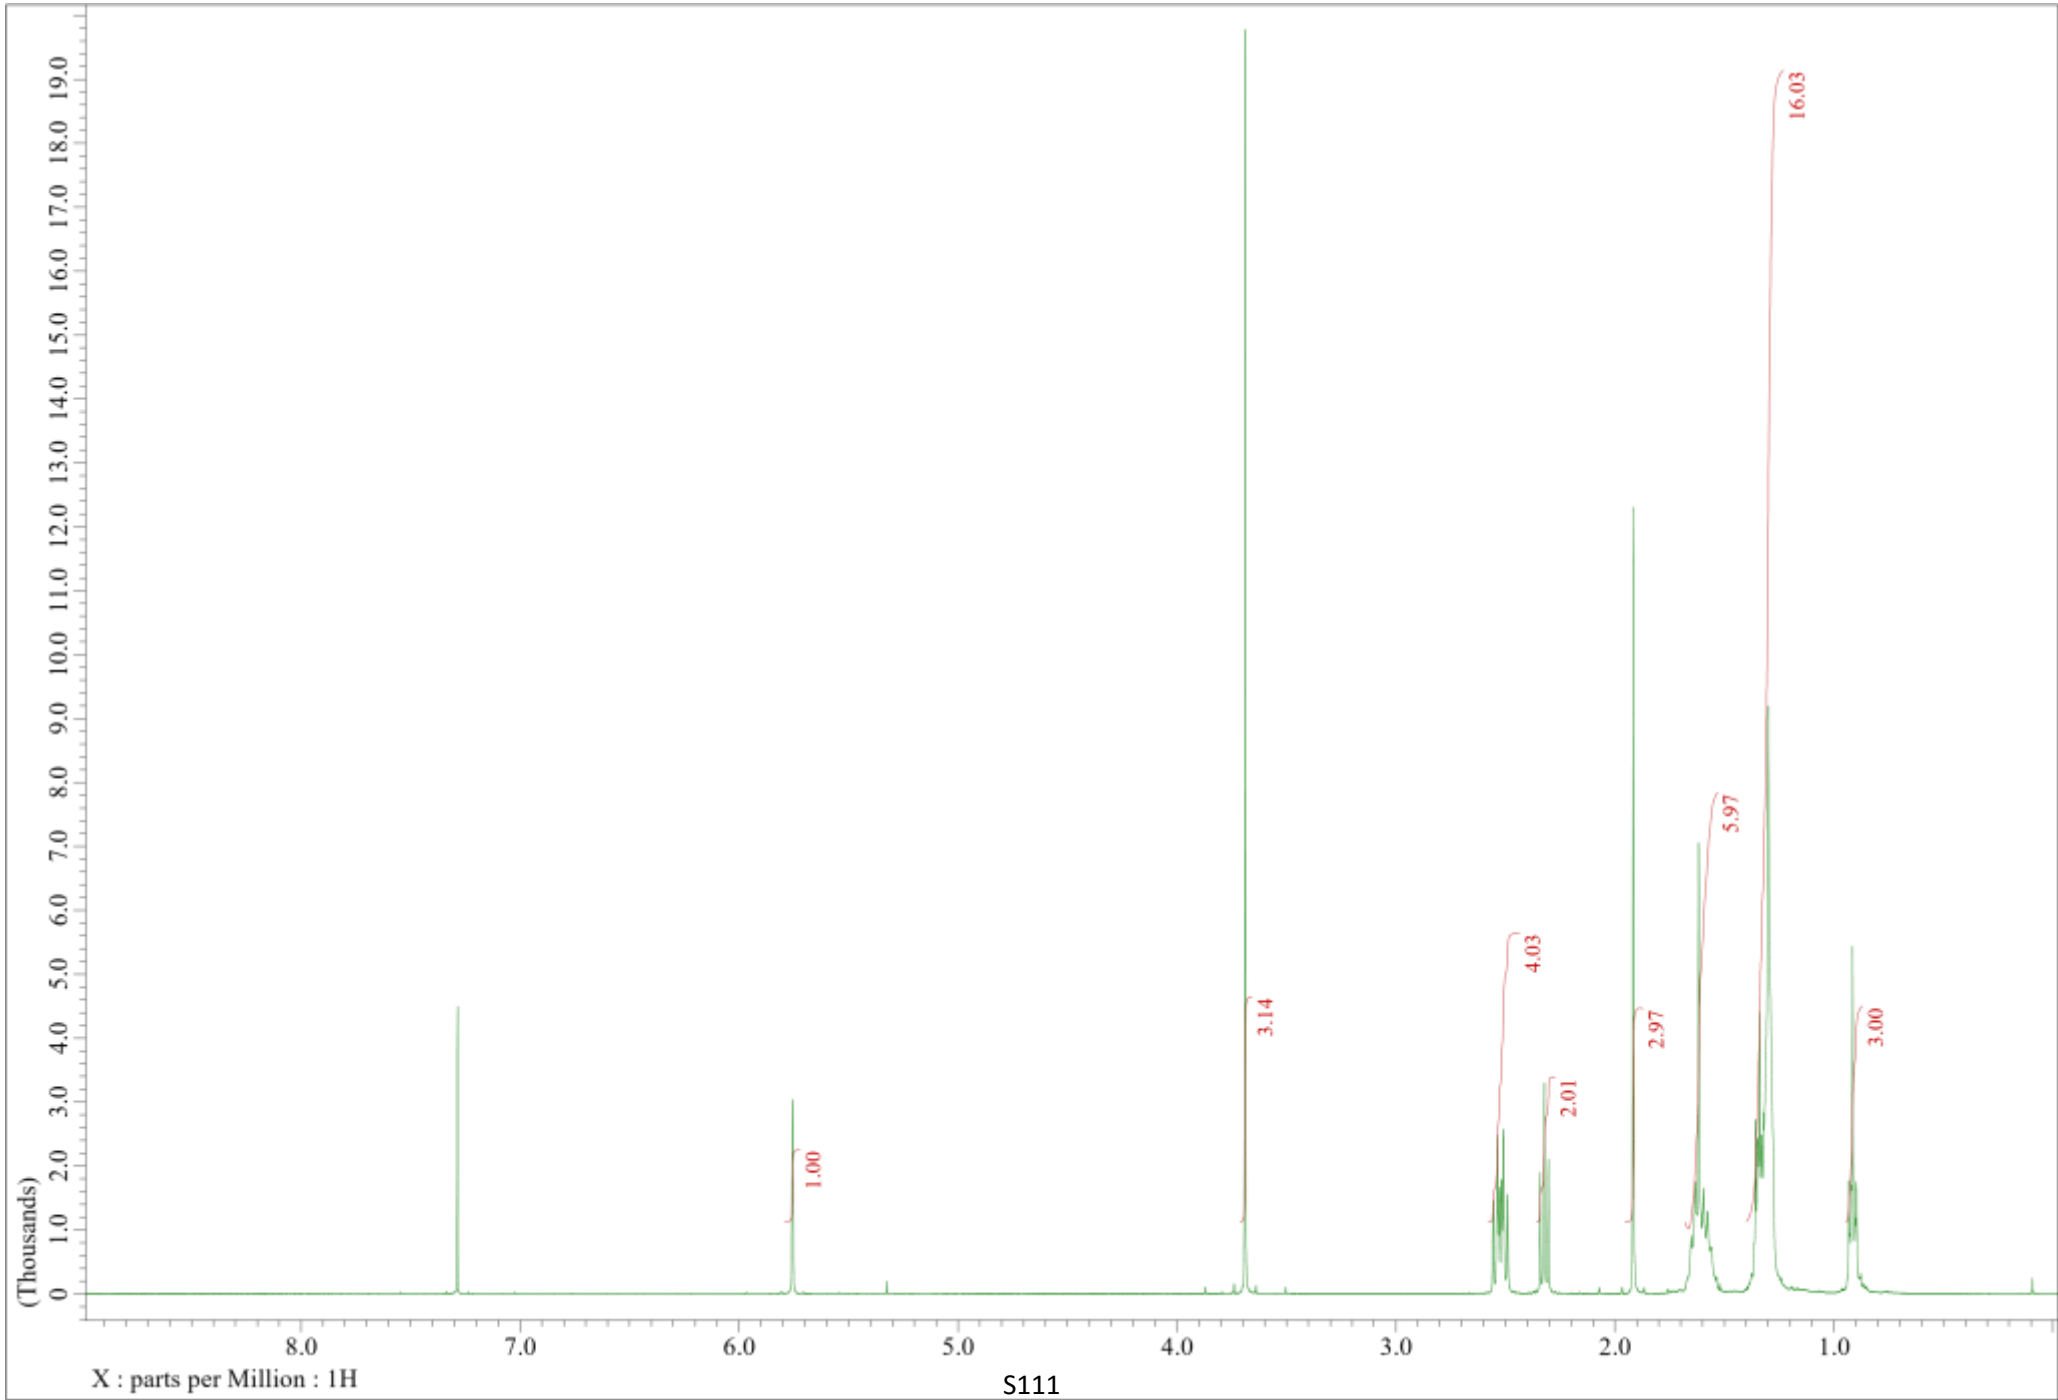

S111

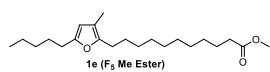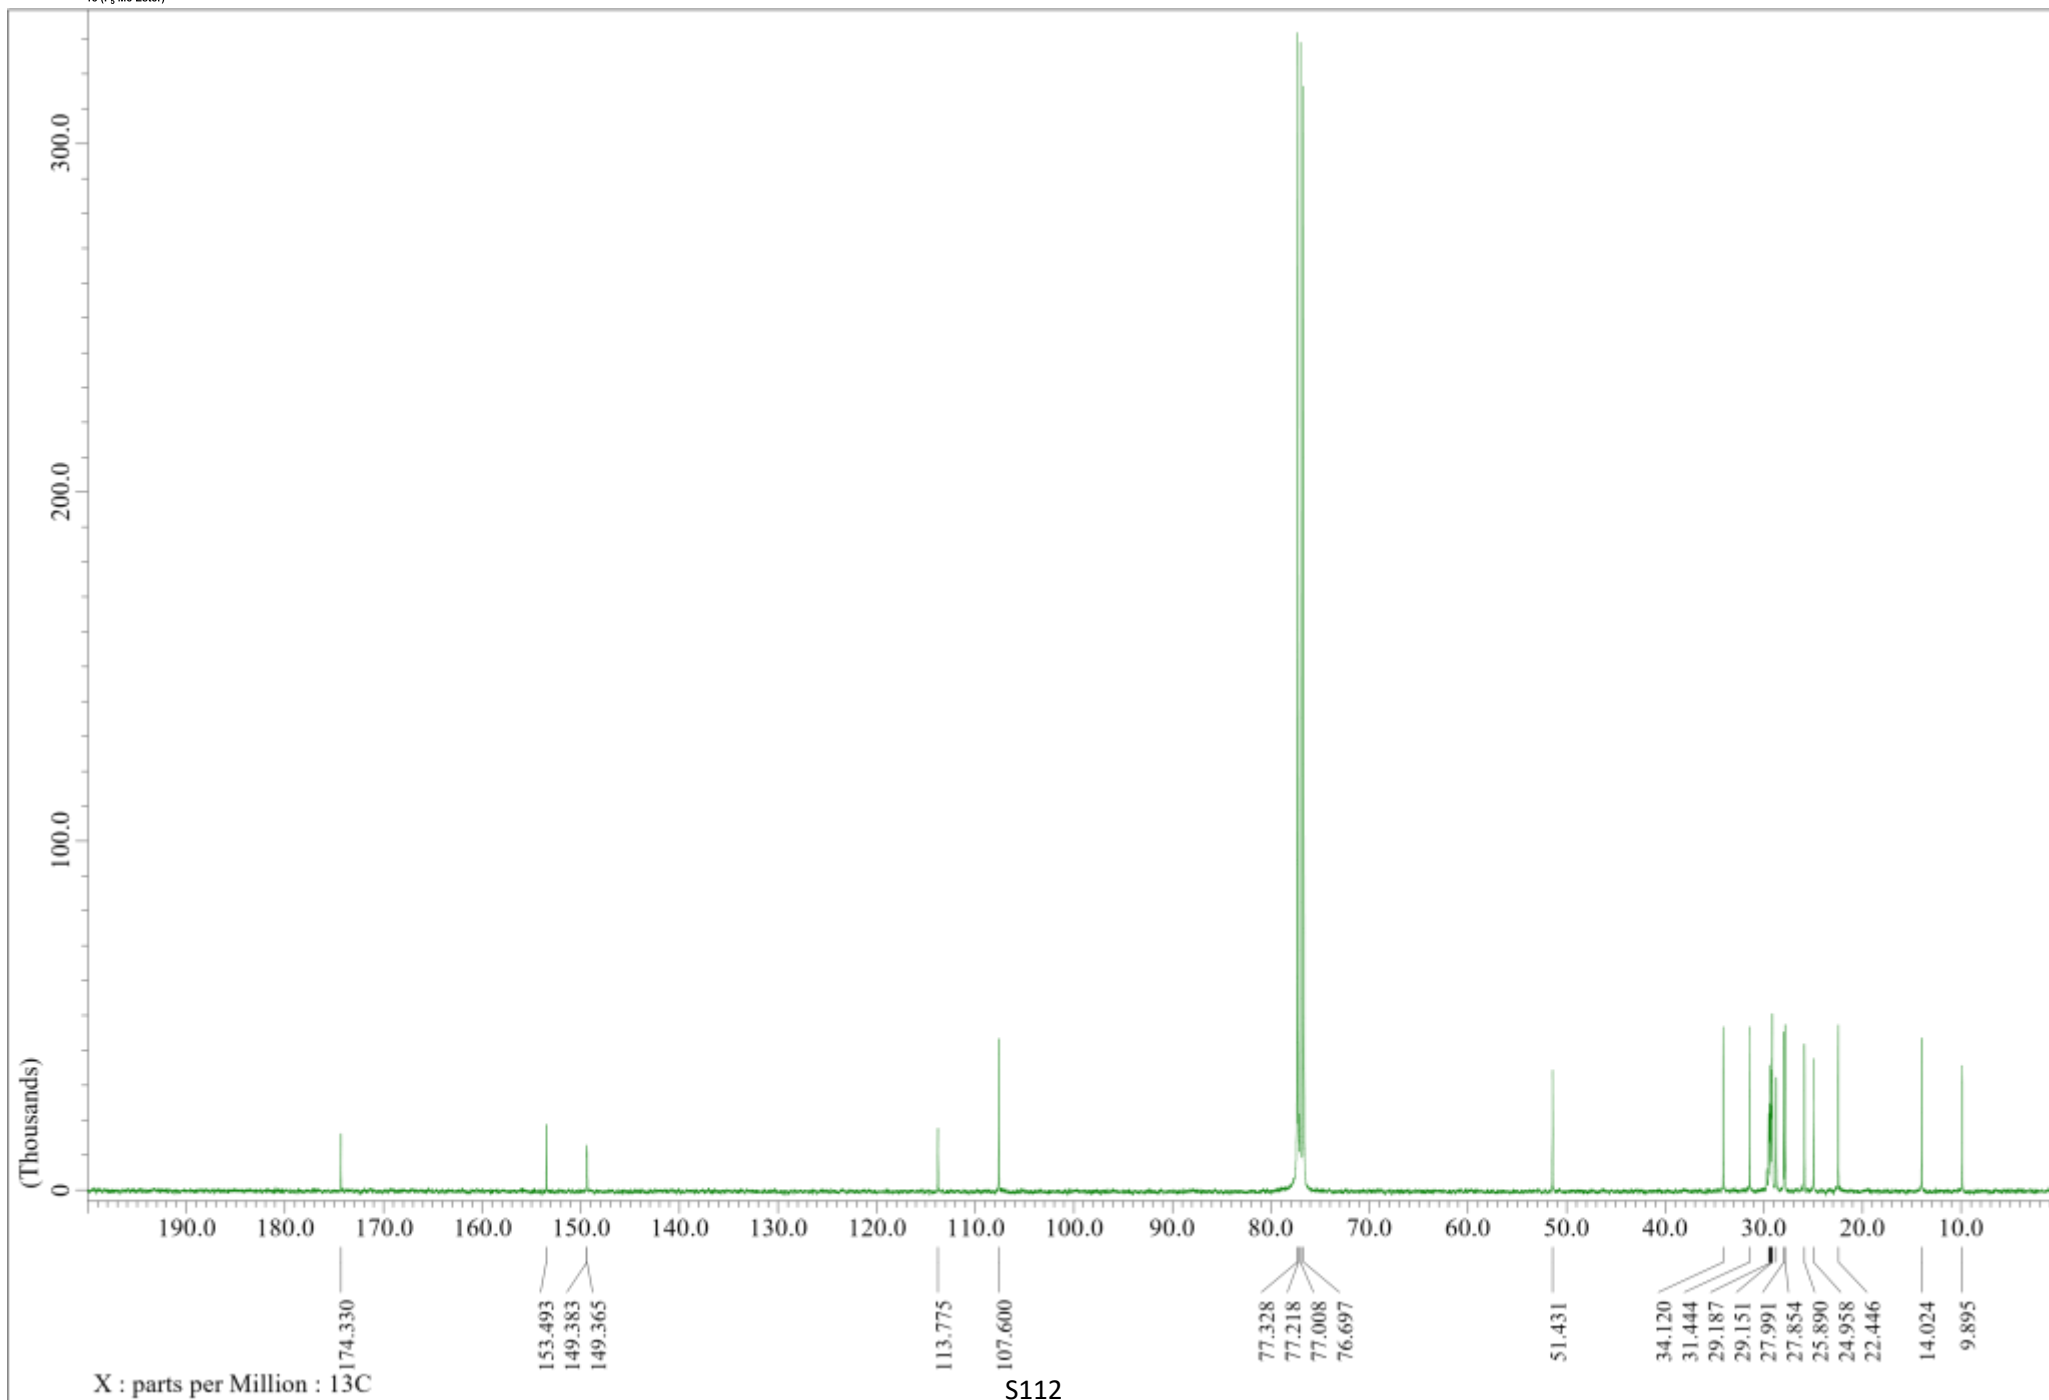

Supplement: c7cc03229c1.pdf [file c7cc03229c1.pdf]
